# Supplementary material for: Globally defining the effects of mutations in a picornavirus capsid
Source: eLife. 2021 Jan 12;10:e64256. doi: 10.7554/eLife.64256 (PMC7861617; doi:10.7554/eLife.64256)
Supplement: Supplementary file 6. [file elife-64256-supp6.xlsx]

## Sheet: Parameters
Supplementary File 6
Parameter name	Parameter description	Source
wt	WT amino acid	NA
position	position in P1	NA
mutation	mutation	NA
aa1_polarity	polarity of WT AA (categorical)	https://github.com/FowlerLab/Envision2017/tree/master/data
aa2_polarity	polarity of mut AA	https://github.com/FowlerLab/Envision2017/tree/master/data
aa1_PI	PI of WT AA	https://github.com/FowlerLab/Envision2017/tree/master/data
aa2_PI	PI of mut AA	https://github.com/FowlerLab/Envision2017/tree/master/data
deltaPI	change in PI	https://github.com/FowlerLab/Envision2017/tree/master/data
aa1_weight	weight of WT AA	https://github.com/FowlerLab/Envision2017/tree/master/data
aa2_weight	weight of mut AA	https://github.com/FowlerLab/Envision2017/tree/master/data
deltaWeight	change in weight	https://github.com/FowlerLab/Envision2017/tree/master/data
aa1vol	volume of WT AA	https://github.com/FowlerLab/Envision2017/tree/master/data
aa2vol	volume of mut AA	https://github.com/FowlerLab/Envision2017/tree/master/data
deltavolume	change in volume	https://github.com/FowlerLab/Envision2017/tree/master/data
Grantham	Grantham score	https://github.com/FowlerLab/Envision2017/tree/master/data
delta_hydrophobicity	change in hydrophobicity	https://github.com/pechmann/polio
wt_size	size classification of WT AA (S small, B big, P proline)	https://github.com/JKlesmith/PACT/blob/master/pact/pact/analysis/sequence/residue_chemical_size.py
mut_size	size of mut AA
wt_polar	polarity of WT AA (- is neg, + pos, P polar, C charged, N non polar)	https://github.com/JKlesmith/PACT/blob/master/pact/pact/analysis/sequence/residue_chemical_size.py
mut_polar	polarity of mut AA
wt_phobic	hydrophobic nature of WT AA (H Hydrophobic, L Hydrophilic, C Cysteine, P Proline)	https://github.com/JKlesmith/PACT/blob/master/pact/pact/analysis/sequence/residue_chemical_size.py
mut_phobic	hydrophobic nature of mut AA
ca.distance	CA distance from center	https://pymolwiki.org/index.php/Distancetoatom
avg.distance	average distance from center	https://pymolwiki.org/index.php/Distancetoatom
max.distance	maximum distance from center	https://pymolwiki.org/index.php/Distancetoatom
ss_class	secondary structure class (loop strand or helix)	dssp
struct_pos	structural position (core, interface, surface)	http://viperdb.scripps.edu/
structural_position	structural position (core, interface ,surface.external ,surface.internal )	http://viperdb.scripps.edu/
RSApent	relative surface accessibility	dssp
contact_num	number of contacts	http://viperdb.scripps.edu/
two_axis	two fold axis	http://viperdb.scripps.edu/
three_axis	three fold axis	http://viperdb.scripps.edu/
five_axis	five fold axis	http://viperdb.scripps.edu/
Aggregation	Tango score
ddg	delta delta G from FoldX (monomer)
pent_ddg	delta delta G from FoldX (Pentamer)
pent_Backbone.Hbond	pentamer sequence detail from FoldX BuildModel output
pent_Sidechain.Hbond	pentamer sequence detail from FoldX BuildModel output
pent_Van.der.Waals	pentamer sequence detail from FoldX BuildModel output
pent_Electrostatics	pentamer sequence detail from FoldX BuildModel output
pent_Solvation.Polar	pentamer sequence detail from FoldX BuildModel output
pent_Solvation.Hydrophobic	pentamer sequence detail from FoldX BuildModel output
pent_Van.der.Waals.clashes	pentamer sequence detail from FoldX BuildModel output
pent_entropy.sidechain	pentamer sequence detail from FoldX BuildModel output
pent_entropy.mainchain	pentamer sequence detail from FoldX BuildModel output
pent_torsional.clash	pentamer sequence detail from FoldX BuildModel output
pent_backbone.clash	pentamer sequence detail from FoldX BuildModel output
pent_helix.dipole	pentamer sequence detail from FoldX BuildModel output
pent_electrostatic.kon	pentamer sequence detail from FoldX BuildModel output
pent_energy.Ionisation	pentamer sequence detail from FoldX BuildModel output
pent_bfact	b factor for pentamer
entB	shannon entropy of enterovirus B alignments
ent_cvbs	shannon entropy of CVB alignments
ent_cvb3	shannon entropy of CVB3 alignments
p1_avg_log2effect	mean log2 mutation fitness effect
type	what position was used for (training or testing)

## Sheet: data_modeling
wt	position	mutation	aa1_polarity	aa2_polarity	aa1_PI	aa2_PI	deltaPI	aa1_weight	aa2_weight	deltaWeight	aa1vol	aa2vol	deltavolume	Grantham	delta_hydrophobicity	wt_size	mut_size	wt_polar	mut_polar	wt_phobic	mut_phobic	ca.distance	avg.distance	max.distance	ss_class	struct_pos	structural_position	RSApent	contact_num	two_axis	three_axis	five_axis	Aggregation	ddg	pent_ddg	pent_Backbone.Hbond	pent_Sidechain.Hbond	pent_Van.der.Waals	pent_Electrostatics	pent_Solvation.Polar	pent_Solvation.Hydrophobic	pent_Van.der.Waals.clashes	pent_entropy.sidechain	pent_entropy.mainchain	pent_torsional.clash	pent_backbone.clash	pent_helix.dipole	pent_electrostatic.kon	pent_energy.Ionisation
G	2	A	Special	Hydrophobic	3.29	6	2.71	75	89	14	60.1	88.6	28.5	60	-2.2	S	S	N	N	B	B	377.315	377.554	378.578	loop	interface	interface	0.548077	2	0	0	1	0	0.079256	-0.132754	0.00128167	-2.13e-05	-1.34808	0.0109532	2.26794	-1.90592	0.208464	0.0304142	0.803229	-0.24174	0.000292612	-5.65e-08	-7.08e-07	0.0407155
G	2	C	Special	Special	3.29	5.07	1.78	75	121	46	60.1	108.5	48.4	159	-2.9	S	S	N	P	B	C	377.315	377.554	378.578	loop	interface	interface	0.548077	2	0	0	1	0	0.10394	0.707595	0.00198269	0	-2.45069	0.0201116	3.75249	-2.86113	0.00230153	0.926966	1.04727	0.186504	0	0	0	0.0817876
G	2	D	Special	negativeCharge	3.29	5.05	1.76	75	133	58	60.1	111.1	51	94	3.1	S	S	N	-	B	L	377.315	377.554	378.578	loop	interface	interface	0.548077	2	0	0	1	0	0.113284	1.62108	0.00198269	0	-1.78682	-0.036866	3.36268	-2.34658	0.00489271	0.376919	1.83572	0.174692	0	0	-0.0225571	0.0570216
G	2	I	Special	Hydrophobic	3.29	6.02	2.73	75	131	56	60.1	166.7	106.6	135	-4.9	S	B	N	N	B	B	377.315	377.554	378.578	loop	interface	interface	0.548077	2	0	0	1	0	0.40158	-3.65956	0.00198269	0	-4.3292	0.0514024	6.05962	-6.58446	0.13045	1.28397	-0.801184	0.41106	0	0	0	0.116786
G	2	L	Special	Hydrophobic	3.29	9.71	6.42	75	131	56	60.1	166.7	106.6	138	-4.2	S	B	N	N	B	B	377.315	377.554	378.578	loop	interface	interface	0.548077	2	0	0	1	0	0.26145	-2.78255	0.00198269	0	-3.49735	0.0531535	5.3841	-5.3033	0.0576409	0.904298	-0.715897	0.26214	0	0	0	0.0706725
G	2	N	Special	Polar	3.29	5.47	2.18	75	132	57	60.1	114.1	54	80	3.1	S	S	N	P	B	L	377.315	377.554	378.578	loop	interface	interface	0.548077	2	0	0	1	0	0.212084	1.85822	0.00198269	0	-2.43416	0.0354241	4.35685	-3.18274	0.0115713	0.592756	1.73016	0.691106	0	0	0	0.0552816
G	2	P	Special	Special	3.29	6.3	3.01	75	115	40	60.1	112.7	52.6	42	1.2	S	P	N	N	B	P	377.315	377.554	378.578	loop	interface	interface	0.548077	2	0	0	1	0	0.204929	5.10339	-0.0728156	0.00768998	-3.88352	0.045056	5.90698	-5.8172	6.71546	1.25022	0.543311	0.335138	0.000427981	-5.65e-08	-7.08e-07	0.0730812
G	2	Q	Special	Polar	3.29	6.24	2.95	75	146	71	60.1	143.8	83.7	87	3.1	S	B	N	P	B	L	377.315	377.554	378.578	loop	interface	interface	0.548077	2	0	0	1	0	0.147579	-2.01492	-0.0171479	-0.0190418	-3.1338	0.0414797	4.99281	-4.44746	0.223676	1.06674	-0.717351	-0.0745686	0.000643714	-5.65e-08	-7.08e-07	0.0697397
G	2	R	Special	PositiveCharge	3.29	6.34	3.05	75	174	99	60.1	173.4	113.3	125	4.1	S	B	N	+	B	L	377.315	377.554	378.578	loop	interface	interface	0.548077	2	0	0	1	1.36	0.0744125	-2.59501	0.00198269	0	-3.45573	0.370455	4.05493	-5.38854	0.0305664	0.884744	-0.0366039	0.627756	2.27e-13	0	0.248565	0.0668731
G	2	S	Special	Polar	3.29	5.68	2.39	75	105	30	60.1	89	28.9	56	0.4	S	S	N	P	B	L	377.315	377.554	378.578	loop	interface	interface	0.548077	2	0	0	1	0	0.0770256	1.25523	0.00198269	0	-1.32327	0.0131641	2.47631	-1.34372	0.00158695	0.358931	0.874081	0.155943	0	0	0	0.0402185
G	2	T	Special	Polar	3.29	5.6	2.31	75	119	44	60.1	116.1	56	59	0.3	S	S	N	P	B	L	377.315	377.554	378.578	loop	interface	interface	0.548077	2	0	0	1	0	0.215086	1.64286	0.00198269	0	-2.27087	0.0271919	4.44144	-2.62139	0.00722732	0.353476	1.31033	0.313858	0	0	0	0.0796104
G	2	V	Special	Hydrophobic	3.29	5.61	2.32	75	117	42	60.1	140	79.9	109	-4.6	S	S	N	N	B	B	377.315	377.554	378.578	loop	interface	interface	0.548077	2	0	0	1	0	0.345453	2.0029	0.00198269	0	-3.04379	0.041591	5.67788	-3.79802	0.195835	0.566759	1.77462	0.489238	0	0	0	0.0968045
G	2	Y	Special	Hydrophobic	3.29	5.66	2.37	75	181	106	60.1	193.6	133.5	147	0.9	S	B	N	N	B	B	377.315	377.554	378.578	loop	interface	interface	0.548077	2	0	0	1	0	0.420244	0.920607	0.00198269	0	-2.91074	3.53805	4.4877	-4.42891	0.019002	0.225849	-0.286216	0.225977	1.79e-05	0	0	0.0479134
A	3	C	Hydrophobic	Special	6	5.07	-0.93	89	121	32	88.6	108.5	19.9	195	-0.7	S	S	N	P	B	C	377.403	376.9	378.348	loop	surface	surface.internal	0.418605	0	0	0	0	0	0.448927	3.31076	-0.073764	0	-2.05789	0.00285005	1.94354	-2.24551	-0.0979791	2.76275	3.02959	0.047166	0	0	0	0
A	3	D	Hydrophobic	negativeCharge	6	5.05	-0.95	89	133	44	88.6	111.1	22.5	126	5.3	S	S	N	-	B	L	377.403	376.9	378.348	loop	surface	surface.internal	0.418605	0	0	0	0	0	0.537673	3.22946	-0.0802864	0	-1.94315	-3.15895	7.27614	-1.5831	-0.0782504	2.82959	0.521062	0.0133043	0	0	-0.566899	0
A	3	E	Hydrophobic	negativeCharge	6	3.22	-2.78	89	147	58	88.6	138.4	49.8	107	5.3	S	B	N	-	B	L	377.403	376.9	378.348	loop	surface	surface.internal	0.418605	0	0	0	0	0	0.0329009	0.711409	-4.45464	-4.395	-2.46425	-1.86381	4.43737	-3.40881	0.022199	6.91543	5.74895	0.052219	0	0	0.121742	0
A	3	F	Hydrophobic	Hydrophobic	6	3.32	-2.68	89	165	76	88.6	189.9	101.3	113	-1	S	B	N	N	B	B	377.403	376.9	378.348	loop	surface	surface.internal	0.418605	0	0	0	0	0	-0.28653	2.24376	-0.0839267	-2.13e-05	-4.81972	1.6583	5.93978	-7.08598	0.143871	3.38307	3.21069	-0.102492	-0.00145776	-5.65e-08	-7.08e-07	0.000198876
A	3	G	Hydrophobic	Special	6	3.29	-2.71	89	75	-14	88.6	60.1	-28.5	60	2.2	S	S	N	N	B	B	377.403	376.9	378.348	loop	surface	surface.internal	0.418605	0	0	0	0	0	0.773292	3.33912	0.0215138	-2.13e-05	2.65923	-1.22e-06	-2.4055	4.74967	-0.262604	-0.741559	-0.515049	-0.176854	0.0184014	-5.65e-08	-7.08e-07	0.0102957
A	3	I	Hydrophobic	Hydrophobic	6	6.02	0.02	89	131	42	88.6	166.7	78.1	94	-2.7	S	B	N	N	B	B	377.403	376.9	378.348	loop	surface	surface.internal	0.418605	0	0	0	0	0	0.464149	3.81839	-0.36493	-2.13e-05	-6.41381	0.0322033	6.46878	-11.0047	5.88562	4.42998	4.46525	0.320236	-0.00103033	-5.65e-08	-7.08e-07	-0.000209825
A	3	L	Hydrophobic	Hydrophobic	6	9.71	3.71	89	131	42	88.6	166.7	78.1	96	-2	S	B	N	N	B	B	377.403	376.9	378.348	loop	surface	surface.internal	0.418605	0	0	0	0	0	-0.481085	-4.39984	-0.308621	0	-5.52892	0.0335985	5.61771	-9.60236	0.223405	3.9832	1.08379	0.0983629	0	0	0	0
A	3	N	Hydrophobic	Polar	6	5.47	-0.53	89	132	43	88.6	114.1	25.5	111	5.3	S	S	N	P	B	L	377.403	376.9	378.348	loop	surface	surface.internal	0.418605	0	0	0	0	0	0.420703	3.20871	-0.100263	-2.13e-05	-2.02443	0.0154605	4.52664	-1.75383	0.0537987	2.19625	0.389902	-0.0948769	8.97e-05	-5.65e-08	-7.08e-07	7.64e-05
A	3	P	Hydrophobic	Special	6	6.3	0.3	89	115	26	88.6	112.7	24.1	27	3.4	S	P	N	N	B	P	377.403	376.9	378.348	loop	surface	surface.internal	0.418605	0	0	0	0	0	-0.351544	-0.424045	-0.0139751	-2.13e-05	-0.395631	0.0113685	0.0945643	-1.06624	-0.038284	1.51161	-0.320322	-0.199916	0.00751324	-5.65e-08	-7.08e-07	-0.00720358
A	3	Q	Hydrophobic	Polar	6	6.24	0.24	89	146	57	88.6	143.8	55.2	91	5.3	S	B	N	P	B	L	377.403	376.9	378.348	loop	surface	surface.internal	0.418605	0	0	0	0	0	0.299309	3.94547	-1.79077	-1.72993	-3.06106	0.0287184	5.01512	-3.87292	-0.100952	4.775	4.72683	-0.0445606	0.000772121	-5.65e-08	-7.08e-07	-6.85e-08
A	3	R	Hydrophobic	PositiveCharge	6	6.34	0.34	89	174	85	88.6	173.4	84.8	112	6.3	S	B	N	+	B	L	377.403	376.9	378.348	loop	surface	surface.internal	0.418605	0	0	0	0	1.36	0.0688345	11.5019	-0.105627	0.00103957	-4.25399	4.17836	6.64506	-5.07727	0.974535	3.26763	2.71329	0.845929	0.0233105	-5.65e-08	2.30879	0.00418773
A	3	S	Hydrophobic	Polar	6	5.68	-0.32	89	105	16	88.6	89	0.4	99	2.6	S	S	N	P	B	L	377.403	376.9	378.348	loop	surface	surface.internal	0.418605	0	0	0	0	0	0.741739	6.5618	0.00232314	0	-0.465696	0	2.9446	1.64688	-0.0454286	1.34798	1.13825	-0.00710895	0	0	0	0
A	3	T	Hydrophobic	Polar	6	5.6	-0.4	89	119	30	88.6	116.1	27.5	58	2.5	S	S	N	P	B	L	377.403	376.9	378.348	loop	surface	surface.internal	0.418605	0	0	0	0	0	2.64254	12.3316	0.476166	-2.55402	-2.70336	0.00710389	5.35266	-2.26408	9.65652	2.87993	1.09876	0.381921	0.145801	-5.65e-08	-7.08e-07	-4.59e-05
A	3	V	Hydrophobic	Hydrophobic	6	5.61	-0.39	89	117	28	88.6	140	51.4	64	-2.4	S	S	N	N	B	B	377.403	376.9	378.348	loop	surface	surface.internal	0.418605	0	0	0	0	0	0.643605	5.78624	-0.248225	0	-3.54146	0.0168829	4.06322	-5.80314	4.63609	2.85319	3.22862	0.581065	0	0	0	0
A	3	Y	Hydrophobic	Hydrophobic	6	5.66	-0.34	89	181	92	88.6	193.6	105	112	3.1	S	B	N	N	B	B	377.403	376.9	378.348	loop	surface	surface.internal	0.418605	0	0	0	0	0	-0.265011	2.9373	-0.0808788	0	-4.26141	1.3369	4.70397	-6.52209	0.41891	3.54166	2.82309	0.977156	0.000110573	0	0	0
Q	4	A	Polar	Hydrophobic	6.24	6	-0.24	146	89	-57	143.8	88.6	-55.2	91	-5.3	B	S	P	N	L	B	374.516	374.618	375.902	strand	interface	interface	0.324444	1	0	0	1	0	0.442949	2.49614	0.14363	4.83064	3.72338	-1.22e-06	-5.95685	3.32219	-0.128393	-4.48039	1.22995	-0.122056	1.16e-06	-5.65e-08	-7.08e-07	-0.0659646
Q	4	D	Polar	negativeCharge	6.24	5.05	-1.19	146	133	-13	143.8	111.1	-32.7	61	0	B	S	P	-	L	L	374.516	374.618	375.902	strand	interface	interface	0.324444	1	0	0	1	0	0.544359	1.71848	-3.55949	1.18453	3.0794	-0.44678	-4.51407	2.88421	0.0807759	-1.71871	5.12904	-0.0140127	-0.0144088	-5.65e-08	-0.320289	-0.0661225
Q	4	E	Polar	negativeCharge	6.24	3.22	-3.02	146	147	1	143.8	138.4	-5.4	29	0	B	B	P	-	L	L	374.516	374.618	375.902	strand	interface	interface	0.324444	1	0	0	1	0	-0.0715656	0.350745	0.0631107	-2.29536	-0.150022	-0.73484	1.59906	-0.513506	0.0915297	1.69852	1.02137	-0.0203588	0.000137615	-5.65e-08	-0.342788	-0.0659646
Q	4	F	Polar	Hydrophobic	6.24	3.32	-2.92	146	165	19	143.8	189.9	46.1	116	-6.3	B	B	P	N	L	B	374.516	374.618	375.902	strand	interface	interface	0.324444	1	0	0	1	1.44	-0.331015	-0.359063	0.0620315	4.83065	-0.21003	-1.22e-06	-1.14311	-1.22466	0.0523927	-2.37237	-0.387211	-0.0247979	0.031584	-5.65e-08	-7.08e-07	0.0580384
Q	4	G	Polar	Special	6.24	3.29	-2.95	146	75	-71	143.8	60.1	-83.7	87	-3.1	B	S	P	N	L	B	374.516	374.618	375.902	strand	interface	interface	0.324444	1	0	0	1	0	0.360921	2.24349	0.145487	4.8139	5.11275	-1.22e-06	-8.01725	5.03302	-0.154546	-4.50665	-0.0182943	-0.0985488	-0.000392748	-5.65e-08	-7.08e-07	-0.0663791
Q	4	I	Polar	Hydrophobic	6.24	6.02	-0.22	146	131	-15	143.8	166.7	22.9	109	-8	B	B	P	N	L	B	374.516	374.618	375.902	strand	interface	interface	0.324444	1	0	0	1	1.28	-0.413779	-2.83679	-0.117841	4.85693	-2.19032	-1.22e-06	0.315089	-4.99462	0.0379949	-1.71389	0.975634	0.019624	-0.0140881	-5.65e-08	-7.08e-07	-0.0253831
Q	4	L	Polar	Hydrophobic	6.24	9.71	3.47	146	131	-15	143.8	166.7	22.9	113	-7.3	B	B	P	N	L	B	374.516	374.618	375.902	strand	interface	interface	0.324444	1	0	0	1	0	-0.100017	-1.49	-0.0852149	4.85495	-1.10395	-1.22e-06	0.000815429	-2.96432	-0.0943649	-2.21687	0.103425	-0.011054	1.16e-06	-5.65e-08	-7.08e-07	0.0265863
Q	4	M	Polar	Hydrophobic	6.24	5.74	-0.5	146	149	3	143.8	162.9	19.1	101	-5.4	B	B	P	N	L	B	374.516	374.618	375.902	strand	interface	interface	0.324444	1	0	0	1	0	-1.27976	-5.4002	-0.613319	4.88554	-5.35454	0	2.20872	-9.27052	0.510157	0.19207	1.87731	0.230358	0.0622296	0	0	-0.0659646
Q	4	N	Polar	Polar	6.24	5.47	-0.77	146	132	-14	143.8	114.1	-29.7	46	0	B	S	P	P	L	L	374.516	374.618	375.902	strand	interface	interface	0.324444	1	0	0	1	0	0.496247	3.34319	0.142985	4.90202	3.2466	-1.22e-06	-4.62275	3.15193	-0.0742004	-3.98696	0.833373	-0.186719	-0.0138395	-5.65e-08	-7.08e-07	-0.0630808
Q	4	P	Polar	Special	6.24	6.3	0.06	146	115	-31	143.8	112.7	-31.1	76	-1.9	B	P	P	N	L	P	374.516	374.618	375.902	strand	interface	interface	0.324444	1	0	0	1	0	2.35016	14.2696	6.25447	4.84669	0.863101	-1.22e-06	-3.39304	-1.10756	5.54335	-3.09409	4.4611	-0.104937	0.000659051	-5.65e-08	-7.08e-07	0.000529158
Q	4	R	Polar	PositiveCharge	6.24	6.34	0.1	146	174	28	143.8	173.4	29.6	43	1	B	B	P	+	L	L	374.516	374.618	375.902	strand	interface	interface	0.324444	1	0	0	1	1.36	0.0859472	0.0668263	0.14476	4.74731	1.44505	0.241497	-3.81442	0.469113	0.004652	-2.92341	-0.710493	0.212088	0	0	0.263198	-0.0125253
Q	4	S	Polar	Polar	6.24	5.68	-0.56	146	105	-41	143.8	89	-54.8	68	-2.7	B	S	P	P	L	L	374.516	374.618	375.902	strand	interface	interface	0.324444	1	0	0	1	0	0.395325	2.45627	0.14363	4.84769	3.75289	-1.22e-06	-5.48337	4.09487	-0.128684	-4.12697	-0.455639	-0.122166	1.16e-06	-5.65e-08	-7.08e-07	-0.0659646
Q	4	T	Polar	Polar	6.24	5.6	-0.64	146	119	-27	143.8	116.1	-27.7	42	-2.8	B	S	P	P	L	L	374.516	374.618	375.902	strand	interface	interface	0.324444	1	0	0	1	0	0.0965975	0.64434	-0.588164	5.45851	1.90782	-0.0188235	-3.50287	1.21402	0.189918	-3.58354	-0.467794	0.10119	-0.0138376	-5.65e-08	-7.08e-07	-0.0659322
Q	4	V	Polar	Hydrophobic	6.24	5.61	-0.63	146	117	-29	143.8	140	-3.8	96	-7.7	B	S	P	N	L	B	374.516	374.618	375.902	strand	interface	interface	0.324444	1	0	0	1	1.35	-0.0270352	-0.458729	0.0315637	4.81399	0.192141	-1.22e-06	-1.45384	-1.1129	0.0377688	-3.07036	-0.20246	0.330492	4.23e-05	-5.65e-08	-7.08e-07	-0.0251211
Q	4	Y	Polar	Hydrophobic	6.24	5.66	-0.58	146	181	35	143.8	193.6	49.8	99	-2.2	B	B	P	N	L	B	374.516	374.618	375.902	strand	interface	interface	0.324444	1	0	0	1	0	-0.0543507	-0.0374766	-0.740771	4.27831	-0.295927	-1.22e-06	-0.499558	-0.971943	0.040132	-1.81227	-0.0221226	-0.107695	0.0311293	-5.65e-08	-7.08e-07	0.0943651
V	5	A	Hydrophobic	Hydrophobic	5.61	6	0.39	117	89	-28	140	88.6	-51.4	64	2.4	S	S	N	N	B	B	373.829	373.482	374.984	strand	interface	interface	0.413793	1	0	0	1	0	0.511738	3.4336	0.881494	0.655743	6.48464	-1.22e-06	-8.57583	8.70347	-0.420855	-3.71008	0.126445	-0.604664	-0.0936717	-5.65e-08	-7.08e-07	-0.106768
V	5	C	Hydrophobic	Special	5.61	5.07	-0.54	117	121	4	140	108.5	-31.5	192	1.7	S	S	N	P	B	C	373.829	373.482	374.984	strand	interface	interface	0.413793	1	0	0	1	0	-0.0397506	0.283597	0.267763	-1.20875	1.7371	0	-3.4415	3.6602	-0.546695	0.459835	0.0443884	-0.660164	-0.271346	0	0	-0.0285871
V	5	D	Hydrophobic	negativeCharge	5.61	5.05	-0.56	117	133	16	140	111.1	-28.9	152	7.7	S	S	N	-	B	L	373.829	373.482	374.984	strand	interface	interface	0.413793	1	0	0	1	0	-0.185387	0.608356	0.318058	0	4.27474	-0.999994	-5.27495	6.37916	-0.638885	-1.50687	-1.2518	0.109133	-0.309567	0	-0.734633	-0.0656072
V	5	E	Hydrophobic	negativeCharge	5.61	3.22	-2.39	117	147	30	140	138.4	-1.6	121	7.7	S	B	N	-	B	L	373.829	373.482	374.984	strand	interface	interface	0.413793	1	0	0	1	0	-0.513518	0.401426	0.211137	0	1.78676	-1.50909	-1.45408	3.10989	-0.163752	0.0238813	-0.397966	-0.398296	-0.0363251	0	-0.802292	-0.0047642
V	5	F	Hydrophobic	Hydrophobic	5.61	3.32	-2.29	117	165	48	140	189.9	49.9	50	1.4	S	B	N	N	B	B	373.829	373.482	374.984	strand	interface	interface	0.413793	1	0	0	1	0	-0.440576	2.62114	0.457822	0.10733	4.40988	0.280894	-4.97146	6.42894	-0.45395	-2.05329	-1.46626	-0.0378656	-0.119803	-5.65e-08	-7.08e-07	-0.080911
V	5	G	Hydrophobic	Special	5.61	3.29	-2.32	117	75	-42	140	60.1	-79.9	109	4.6	S	S	N	N	B	B	373.829	373.482	374.984	strand	interface	interface	0.413793	1	0	0	1	0	2.05378	10.0263	0.664222	0.153988	8.04157	-1.22e-06	-10.6422	10.9908	-0.499179	-3.69245	5.72207	-0.606234	-0.17332	-5.65e-08	-7.08e-07	-0.106253
V	5	H	Hydrophobic	PositiveCharge	5.61	7.59	1.98	117	155	38	140	153.2	13.2	84	7.4	S	B	N	+	B	L	373.829	373.482	374.984	strand	interface	interface	0.413793	1	0	0	1	0.12	0.321536	4.27326	0.294661	0	3.93979	2.84e-14	-4.62486	6.06574	-0.631365	-1.90071	-0.12439	1.07608	-0.306586	0	0	0.178309
V	5	I	Hydrophobic	Hydrophobic	5.61	6.02	0.41	117	131	14	140	166.7	26.7	29	-0.3	S	B	N	N	B	B	373.829	373.482	374.984	strand	interface	interface	0.413793	1	0	0	1	0	-0.421829	-1.93231	-0.399907	-0.352166	-1.86302	0.00580162	2.20329	-3.11357	-0.184423	1.56524	0.682999	-0.491757	0.00168795	-5.65e-08	-7.08e-07	0.0152068
V	5	K	Hydrophobic	PositiveCharge	5.61	9.74	4.13	117	146	29	140	168.6	28.6	97	8.1	S	B	N	+	B	L	373.829	373.482	374.984	strand	interface	interface	0.413793	1	0	0	1	1.36	-0.256527	-0.297873	-0.405081	-0.429992	0.242302	0.297655	-1.16061	0.549423	0.174725	0.856137	-0.155126	-0.622836	0.214748	-5.65e-08	0.271184	0.0843473
V	5	L	Hydrophobic	Hydrophobic	5.61	9.71	4.1	117	131	14	140	166.7	26.7	32	0.4	S	B	N	N	B	B	373.829	373.482	374.984	strand	interface	interface	0.413793	1	0	0	1	0	-0.573654	-1.30166	-0.231047	-0.126208	-0.28846	0.00500824	-0.123983	-1.39378	0.724601	0.872234	-0.253656	-0.548407	0.23735	-5.65e-08	-7.08e-07	0.0620376
V	5	M	Hydrophobic	Hydrophobic	5.61	5.74	0.13	117	149	32	140	162.9	22.9	21	2.3	S	B	N	N	B	B	373.829	373.482	374.984	strand	interface	interface	0.413793	1	0	0	1	0	-0.612816	-2.38176	-0.303165	-0.205328	-0.0899022	-1.22e-06	-1.6358	-0.151169	0.467762	0.538091	-0.573072	-0.539102	0.33842	-5.65e-08	-7.08e-07	0.109921
V	5	N	Hydrophobic	Polar	5.61	5.47	-0.14	117	132	15	140	114.1	-25.9	133	7.7	S	S	N	P	B	L	373.829	373.482	374.984	strand	interface	interface	0.413793	1	0	0	1	0	0.0252366	-0.807432	-0.944377	-5.90562	2.89126	-1.22e-06	-1.39536	5.90026	0.546908	-0.75617	-0.579541	-0.452947	0.0408052	-5.65e-08	-7.08e-07	-0.111852
V	5	P	Hydrophobic	Special	5.61	6.3	0.69	117	115	-2	140	112.7	-27.3	68	5.8	S	P	N	N	B	P	373.829	373.482	374.984	strand	interface	interface	0.413793	1	0	0	1	0	1.67094	8.49081	0.644306	0.252178	5.62902	-1.22e-06	-8.15402	7.77297	-0.24699	-2.6006	5.90674	-0.619559	-0.253246	-5.65e-08	-7.08e-07	-0.0932341
V	5	Q	Hydrophobic	Polar	5.61	6.24	0.63	117	146	29	140	143.8	3.8	96	7.7	S	B	N	P	B	L	373.829	373.482	374.984	strand	interface	interface	0.413793	1	0	0	1	0	0.24815	1.83699	-0.0634196	-0.0814551	2.18388	-1.22e-06	-1.83979	3.96221	0.313576	-0.0733221	-2.045	-0.541948	0.311951	-5.65e-08	-7.08e-07	0.0222539
V	5	R	Hydrophobic	PositiveCharge	5.61	6.34	0.73	117	174	57	140	173.4	33.4	96	8.7	S	B	N	+	B	L	373.829	373.482	374.984	strand	interface	interface	0.413793	1	0	0	1	1.36	0.0387526	1.47001	0.518566	0.483183	1.96881	0.707662	-3.2091	3.46376	0.256646	-0.835168	-2.26662	-0.228458	0.211637	-5.65e-08	0.562607	0.0481182
V	5	S	Hydrophobic	Polar	5.61	5.68	0.07	117	105	-12	140	89	-51	124	5	S	S	N	P	B	L	373.829	373.482	374.984	strand	interface	interface	0.413793	1	0	0	1	0	0.367038	3.62436	1.21005	0.814936	6.77189	-1.22e-06	-8.379	9.90892	-0.420911	-3.66421	-2.45759	-0.0247859	-0.144178	-5.65e-08	-7.08e-07	-0.134945
V	5	T	Hydrophobic	Polar	5.61	5.6	-0.01	117	119	2	140	116.1	-23.9	69	4.9	S	S	N	P	B	L	373.829	373.482	374.984	strand	interface	interface	0.413793	1	0	0	1	0	0.127452	1.31042	-0.0144876	-0.304634	2.10982	0	-2.24054	3.28234	-0.548144	-0.57778	-0.0575977	-0.297492	-0.232622	0	0	-0.0410724
V	5	W	Hydrophobic	Hydrophobic	5.61	5.89	0.28	117	204	87	140	227.8	87.8	88	5.1	S	B	N	N	B	B	373.829	373.482	374.984	strand	interface	interface	0.413793	1	0	0	1	0	0.333259	5.36956	0.302857	0	2.31854	0	-2.47674	3.90619	-0.434366	-1.09369	2.71685	0.195521	-0.310188	0	0	-0.065605
S	6	A	Polar	Hydrophobic	5.68	6	0.32	105	89	-16	89	88.6	-0.4	99	-2.6	S	S	P	N	L	B	372.086	372.393	373.127	strand	surface	surface.internal	0.36129	0	0	0	0	0	-0.0485147	-0.0563473	-0.0126244	0	0.0482334	0	-1.09136	-1.25899	-0.00805676	-0.773792	3.04119	-0.000940867	0.00143158	0	0	0
S	6	C	Polar	Special	5.68	5.07	-0.61	105	121	16	89	108.5	19.5	112	-3.3	S	S	P	P	L	C	372.086	372.393	373.127	strand	surface	surface.internal	0.36129	0	0	0	0	0	-0.0456821	0.00450647	-0.113733	0	-1.3742	0	0.425014	-2.51071	0.181793	1.02913	2.30345	0.0637611	0.0365299	0	0	0
S	6	E	Polar	negativeCharge	5.68	3.22	-2.46	105	147	42	89	138.4	49.4	80	2.7	S	B	P	-	L	L	372.086	372.393	373.127	strand	surface	surface.internal	0.36129	0	0	0	0	0	-0.770862	-3.14518	-2.65915	-3.80247	-2.07097	-0.384678	3.17472	-3.29353	0.237597	4.0872	1.56019	0.126833	0.0693825	-0.0755179	-0.0454109	7.11e-15
S	6	F	Polar	Hydrophobic	5.68	3.32	-2.36	105	165	60	89	189.9	100.9	155	-3.6	S	B	P	N	L	B	372.086	372.393	373.127	strand	surface	surface.internal	0.36129	0	0	0	0	0	-0.940559	-4.19804	-0.244535	0.339501	-6.87129	0.15331	5.24599	-10.3825	-0.160108	3.66789	3.98224	0.0653585	0.0500716	-5.65e-08	-7.08e-07	0.00606121
S	6	G	Polar	Special	5.68	3.29	-2.39	105	75	-30	89	60.1	-28.9	56	-0.4	S	S	P	N	L	B	372.086	372.393	373.127	strand	surface	surface.internal	0.36129	0	0	0	0	0	-0.810245	-4.0965	0.144712	0	2.02484	0	-3.62501	1.28298	-0.613839	-0.891104	-2.34412	-0.0749568	-0.0600972	0	0	0
S	6	H	Polar	PositiveCharge	5.68	7.59	1.91	105	155	50	89	153.2	64.2	89	2.4	S	B	P	+	L	L	372.086	372.393	373.127	strand	surface	surface.internal	0.36129	0	0	0	0	0.12	-0.208603	1.58911	-0.429114	-0.352837	-2.69973	1.22e-06	3.16564	-3.97396	0.423937	1.67443	3.47398	0.0628493	0.0387295	5.65e-08	7.08e-07	0.243912
S	6	I	Polar	Hydrophobic	5.68	6.02	0.34	105	131	26	89	166.7	77.7	142	-5.3	S	B	P	N	L	B	372.086	372.393	373.127	strand	surface	surface.internal	0.36129	0	0	0	0	0	0.0112123	0.706192	-0.357071	0.131648	-5.10569	0.0015588	4.43855	-8.60362	4.53638	2.32501	3.11882	0.220609	0.168379	5.65e-08	7.08e-07	-2.66e-10
S	6	K	Polar	PositiveCharge	5.68	9.74	4.06	105	146	41	89	168.6	79.6	121	3.1	S	B	P	+	L	L	372.086	372.393	373.127	strand	surface	surface.internal	0.36129	0	0	0	0	1.36	-0.340626	-0.75042	-0.0840503	-1.70739	-2.64769	0.0726528	2.49426	-4.66531	0.264223	2.05494	3.28621	0.0731497	0.115479	0.0485291	0.0600507	0
S	6	L	Polar	Hydrophobic	5.68	9.71	4.03	105	131	26	89	166.7	77.7	145	-4.6	S	B	P	N	L	B	372.086	372.393	373.127	strand	surface	surface.internal	0.36129	0	0	0	0	0	-0.591736	-2.94802	-0.262696	0	-4.495	0	3.48387	-7.87721	0.344659	1.93729	3.80446	0.11661	0.135746	0	0	0
S	6	M	Polar	Hydrophobic	5.68	5.74	0.06	105	149	44	89	162.9	73.9	135	-2.7	S	B	P	N	L	B	372.086	372.393	373.127	strand	surface	surface.internal	0.36129	0	0	0	0	0	-1.15875	-4.3179	-0.290404	0	-6.28711	0	4.50001	-9.82541	0.289262	3.29064	3.8665	0.138621	0.0847191	0	0	0
S	6	N	Polar	Polar	5.68	5.47	-0.21	105	132	27	89	114.1	25.1	46	2.7	S	S	P	P	L	L	372.086	372.393	373.127	strand	surface	surface.internal	0.36129	0	0	0	0	0	-0.443662	-3.20248	-2.26254	-2.20355	-1.42715	1.22e-06	1.78937	-2.21452	1.07667	2.30754	-0.370604	0.102298	0.0771535	5.65e-08	7.08e-07	-2.66e-10
S	6	P	Polar	Special	5.68	6.3	0.62	105	115	10	89	112.7	23.7	74	0.8	S	P	P	N	L	P	372.086	372.393	373.127	strand	surface	surface.internal	0.36129	0	0	0	0	0	0.0952445	2.42458	5.51216	0	-2.68006	0	-0.123387	-6.34324	0.999967	0.688426	4.33914	0.031564	0.0376539	0	0	0
S	6	Q	Polar	Polar	5.68	6.24	0.56	105	146	41	89	143.8	54.8	68	2.7	S	B	P	P	L	L	372.086	372.393	373.127	strand	surface	surface.internal	0.36129	0	0	0	0	0	-0.709572	-2.13789	-1.99645	-2.93624	-2.04874	-0.0118286	2.76611	-3.02605	0.372701	3.12488	1.37382	0.243898	0.080662	5.65e-08	7.08e-07	-2.66e-10
S	6	R	Polar	PositiveCharge	5.68	6.34	0.66	105	174	69	89	173.4	84.4	110	3.7	S	B	P	+	L	L	372.086	372.393	373.127	strand	surface	surface.internal	0.36129	0	0	0	0	1.36	-0.204936	-0.962331	-1.01216	-4.56224	-2.90112	-0.0242735	3.06576	-4.1619	0.342493	3.90654	3.69978	0.479181	0.15666	0.147595	0.0580057	7.11e-15
S	6	T	Polar	Polar	5.68	5.6	-0.08	105	119	14	89	116.1	27.1	58	-0.1	S	S	P	P	L	L	372.086	372.393	373.127	strand	surface	surface.internal	0.36129	0	0	0	0	0	0.766594	3.96642	-0.0738977	-6.315	-1.28024	0	3.01848	-1.20066	1.29723	1.93752	2.32825	4.25474	0.0673779	0	0	0
S	6	V	Polar	Hydrophobic	5.68	5.61	-0.07	105	117	12	89	140	51	124	-5	S	S	P	N	L	B	372.086	372.393	373.127	strand	surface	surface.internal	0.36129	0	0	0	0	0	0.416629	3.38671	-0.237652	2.13e-05	-2.60094	1.22e-06	2.50818	-4.42194	4.348	1.04528	2.36498	0.380789	0.144899	5.65e-08	7.08e-07	-2.66e-10
S	6	W	Polar	Hydrophobic	5.68	5.89	0.21	105	204	99	89	227.8	138.8	177	0.1	S	B	P	N	L	B	372.086	372.393	373.127	strand	surface	surface.internal	0.36129	0	0	0	0	0	-0.460721	-3.19472	-0.180432	-0.0444885	-6.5706	1.22e-06	5.2957	-9.7829	0.491371	3.76486	3.76976	0.0620009	0.0134503	5.65e-08	7.08e-07	-2.66e-10
S	6	Y	Polar	Hydrophobic	5.68	5.66	-0.02	105	181	76	89	193.6	104.6	144	0.5	S	B	P	N	L	B	372.086	372.393	373.127	strand	surface	surface.internal	0.36129	0	0	0	0	0	-0.413863	-2.17529	-0.204785	0	-6.25238	0.141167	5.12465	-9.2051	0.307427	3.58315	4.2547	0.0758731	0.0471428	0	0	0
T	7	A	Polar	Hydrophobic	5.6	6	0.4	119	89	-30	116.1	88.6	-27.5	58	-2.5	S	S	P	N	L	B	371.487	370.954	372.247	strand	surface	surface.internal	0.494186	0	0	0	0	0	0.640277	3.52048	2.8981	2.87938	0.912562	0	-2.11508	0.14032	-0.0322925	-2.75369	2.888	-1.29682	-0.0511403	0	0	0
T	7	C	Polar	Special	5.6	5.07	-0.53	119	121	2	116.1	108.5	-7.6	149	-3.2	S	S	P	P	L	C	371.487	370.954	372.247	strand	surface	surface.internal	0.494186	0	0	0	0	0	0.38027	1.41028	1.99265	1.98596	-0.401939	0	-0.924135	-1.02066	-0.0174951	-1.11086	2.204	-1.29724	0.108298	0	0	0
T	7	D	Polar	negativeCharge	5.6	5.05	-0.55	119	133	14	116.1	111.1	-5	85	2.8	S	S	P	-	L	L	371.487	370.954	372.247	strand	surface	surface.internal	0.494186	0	0	0	0	0	1.02814	3.63477	2.85167	2.87938	0.146955	-0.107608	-0.75645	-0.650043	0.287728	-2.10456	2.38809	-1.24468	0.157762	0	-0.0557015	-3.55e-15
T	7	E	Polar	negativeCharge	5.6	3.22	-2.38	119	147	28	116.1	138.4	22.3	65	2.8	S	B	P	-	L	L	371.487	370.954	372.247	strand	surface	surface.internal	0.494186	0	0	0	0	0	-0.277953	-0.371647	-0.582556	-0.506149	-0.656172	-0.0154986	0.683873	-1.42278	0.282288	1.65807	1.32926	-1.08059	0.101121	0	-0.0749149	0.0135153
T	7	F	Polar	Hydrophobic	5.6	3.32	-2.28	119	165	46	116.1	189.9	73.8	103	-3.5	S	B	P	N	L	B	371.487	370.954	372.247	strand	surface	surface.internal	0.494186	0	0	0	0	0	-0.568784	-2.00596	2.86135	3.1511	-4.40173	0.0169178	3.03312	-6.7581	-0.063783	0.240368	1.21146	-1.29666	0.000575429	-5.65e-08	-7.08e-07	2.66e-10
T	7	G	Polar	Special	5.6	3.29	-2.31	119	75	-44	116.1	60.1	-56	59	-0.3	S	S	P	N	L	B	371.487	370.954	372.247	strand	surface	surface.internal	0.494186	0	0	0	0	0	0.93264	3.96709	4.19676	4.32208	2.02009	0.00740023	-3.94677	1.10612	-0.384061	-3.93262	1.86293	-1.28485	-0.334246	-5.65e-08	-7.08e-07	2.66e-10
T	7	H	Polar	PositiveCharge	5.6	7.59	1.99	119	155	36	116.1	153.2	37.1	47	2.5	S	B	P	+	L	L	371.487	370.954	372.247	strand	surface	surface.internal	0.494186	0	0	0	0	0.12	0.0998449	0.774827	0.241867	0.405519	-2.52751	-0.0175485	5.19463	-2.72498	0.19506	0.392374	0.100813	-1.30158	0.141056	-5.65e-08	-0.119502	0.935689
T	7	I	Polar	Hydrophobic	5.6	6.02	0.42	119	131	12	116.1	166.7	50.6	89	-5.2	S	B	P	N	L	B	371.487	370.954	372.247	strand	surface	surface.internal	0.494186	0	0	0	0	0	-0.17955	-1.34689	2.55129	2.88164	-2.65708	-1.22e-06	2.29484	-4.70454	0.665614	-1.19174	-0.0472004	-1.14119	0.357191	-5.65e-08	-7.08e-07	0.00147637
T	7	L	Polar	Hydrophobic	5.6	9.71	4.11	119	131	12	116.1	166.7	50.6	92	-4.5	S	B	P	N	L	B	371.487	370.954	372.247	strand	surface	surface.internal	0.494186	0	0	0	0	0	-0.125561	-0.0605729	2.58685	2.87938	-2.14509	0	1.85425	-3.90076	0.805264	-1.39605	0.488017	-1.23244	0.333911	0	0	0
T	7	N	Polar	Polar	5.6	5.47	-0.13	119	132	13	116.1	114.1	-2	65	2.8	S	S	P	P	L	L	371.487	370.954	372.247	strand	surface	surface.internal	0.494186	0	0	0	0	0	0.104177	1.09772	0.507062	0.495643	-0.742496	1.22e-06	0.755056	-1.07009	0.248687	0.542981	1.54474	-1.17981	0.0719865	5.65e-08	7.08e-07	-0.00404128
T	7	P	Polar	Special	5.6	6.3	0.7	119	115	-4	116.1	112.7	-3.4	38	0.9	S	P	P	N	L	P	371.487	370.954	372.247	strand	surface	surface.internal	0.494186	0	0	0	0	0	-0.118119	1.00035	2.96754	3.01253	0.694611	-1.22e-06	-3.83545	-0.696564	0.412019	-2.10873	1.86097	-1.30808	0.203392	-5.65e-08	-7.08e-07	0.00150547
T	7	Q	Polar	Polar	5.6	6.24	0.64	119	146	27	116.1	143.8	27.7	42	2.8	S	B	P	P	L	L	371.487	370.954	372.247	strand	surface	surface.internal	0.494186	0	0	0	0	0	-0.173243	-1.21355	-0.116838	-0.0867142	-1.10512	0	0.940933	-1.65994	-0.00301382	1.12547	0.983924	-1.29224	0.0768399	0	0	0
T	7	R	Polar	PositiveCharge	5.6	6.34	0.74	119	174	55	116.1	173.4	57.3	71	3.8	S	B	P	+	L	L	371.487	370.954	372.247	strand	surface	surface.internal	0.494186	0	0	0	0	1.36	0.038384	-0.4856	-0.976339	-2.64087	-2.65095	0.187463	3.49527	-2.99859	0.216157	3.89943	2.04043	-0.878747	0.217402	0	-0.178859	-3.55e-15
T	7	S	Polar	Polar	5.6	5.68	0.08	119	105	-14	116.1	89	-27.1	58	0.1	S	S	P	P	L	L	371.487	370.954	372.247	strand	surface	surface.internal	0.494186	0	0	0	0	0	0.0960091	0.0700757	-0.217607	-0.235892	0.465992	0	-0.976201	0.462345	-0.029594	-0.171093	1.368	-0.595874	-0.0213553	0	0	0
T	7	V	Polar	Hydrophobic	5.6	5.61	0.01	119	117	-2	116.1	140	23.9	69	-4.9	S	S	P	N	L	B	371.487	370.954	372.247	strand	surface	surface.internal	0.494186	0	0	0	0	0	0.138916	0.888841	2.75396	2.87938	-0.887032	0	0.805484	-1.76336	0.434389	-2.08385	0.0456055	-1.29574	0.260756	0	0	0
T	7	W	Polar	Hydrophobic	5.6	5.89	0.29	119	204	85	116.1	227.8	111.7	128	0.2	S	B	P	N	L	B	371.487	370.954	372.247	strand	surface	surface.internal	0.494186	0	0	0	0	0	0.266445	-0.637623	2.64304	2.87219	-3.43222	0	2.14754	-5.84911	1.26599	-0.717713	1.60922	-1.17655	0.29585	0	0	0
T	7	Y	Polar	Hydrophobic	5.6	5.66	0.06	119	181	62	116.1	193.6	77.5	92	0.6	S	B	P	N	L	B	371.487	370.954	372.247	strand	surface	surface.internal	0.494186	0	0	0	0	0	-0.510982	-0.75822	2.82626	3.22222	-4.74937	0.0129354	4.16923	-6.68165	-0.0138604	0.536737	1.17646	-1.25609	0.0863549	-5.65e-08	-7.08e-07	-0.00109018
Q	8	A	Polar	Hydrophobic	6.24	6	-0.24	146	89	-57	143.8	88.6	-55.2	91	-5.3	B	S	P	N	L	B	373.789	374.949	378.268	loop	interface	interface	0.0311111	3	0	0	1	0	0.0365835	1.67856	1.07491	10.9157	9.83468	-0.0230854	-16.4229	7.75794	-0.148147	-8.37459	-3.06642	0.175775	-3.98501	-5.65e-08	-7.08e-07	-0.0452918
Q	8	C	Polar	Special	6.24	5.07	-1.17	146	121	-25	143.8	108.5	-35.3	154	-6	B	S	P	P	L	C	373.789	374.949	378.268	loop	interface	interface	0.0311111	3	0	0	1	0	0.386507	2.90108	0.233544	9.84207	5.79912	-0.0396194	-13.9459	3.90712	-0.117155	-3.6246	0.561258	0.303831	-2.91644	-5.65e-08	-7.08e-07	-0.0185541
Q	8	D	Polar	negativeCharge	6.24	5.05	-1.19	146	133	-13	143.8	111.1	-32.7	61	0	B	S	P	-	L	L	373.789	374.949	378.268	loop	interface	interface	0.0311111	3	0	0	1	0	-0.234248	22.0328	0.897013	10.7977	6.17612	-1.72822	2.58499	6.8784	2.38555	-6.15872	-1.99017	1.91225	-3.39202	0.000112799	0.290533	-0.0128053
Q	8	E	Polar	negativeCharge	6.24	3.22	-3.02	146	147	1	143.8	138.4	-5.4	29	0	B	B	P	-	L	L	373.789	374.949	378.268	loop	interface	interface	0.0311111	3	0	0	1	0	-0.124386	16.7282	3.39516	7.42349	1.37229	0.0791874	6.50098	0.692282	-0.192756	-1.52519	-1.28403	0.061736	-0.909455	4.3e-05	0.245572	-0.0405498
Q	8	F	Polar	Hydrophobic	6.24	3.32	-2.92	146	165	19	143.8	189.9	46.1	116	-6.3	B	B	P	N	L	B	373.789	374.949	378.268	loop	interface	interface	0.0311111	3	0	0	1	0	-0.414907	55.5836	0.988861	10.8039	-0.175252	-0.0641594	-7.62996	-5.6656	58.5629	-4.06832	-0.273473	3.12695	-2.71803	-5.65e-08	-7.08e-07	-0.0221444
Q	8	G	Polar	Special	6.24	3.29	-2.95	146	75	-71	143.8	60.1	-83.7	87	-3.1	B	S	P	N	L	B	373.789	374.949	378.268	loop	interface	interface	0.0311111	3	0	0	1	0	0.43399	6.64479	1.16807	11.0953	13.7935	-0.020761	-20.1738	14.0086	-0.439054	-8.6126	-4.06662	-0.0654196	-4.96241	-5.65e-08	-7.08e-07	-0.0424276
Q	8	I	Polar	Hydrophobic	6.24	6.02	-0.22	146	131	-15	143.8	166.7	22.9	109	-8	B	B	P	N	L	B	373.789	374.949	378.268	loop	interface	interface	0.0311111	3	0	0	1	0	0.327749	1.93752	0.846759	10.6681	1.16655	-0.0387698	-8.69577	-6.06745	3.64265	-3.57024	1.48128	2.50243	-2.16309	-5.65e-08	-7.08e-07	0.00196217
Q	8	K	Polar	PositiveCharge	6.24	9.74	3.5	146	146	0	143.8	168.6	24.8	53	0.4	B	B	P	+	L	L	373.789	374.949	378.268	loop	interface	interface	0.0311111	3	0	0	1	1.36	-0.7144	12.1331	-2.44356	1.05393	-2.36782	0.462639	12.0532	-5.02584	7.63215	0.948117	-0.15965	0.186064	0.911817	7.65e-05	-0.153748	-0.0524506
Q	8	L	Polar	Hydrophobic	6.24	9.71	3.47	146	131	-15	143.8	166.7	22.9	113	-7.3	B	B	P	N	L	B	373.789	374.949	378.268	loop	interface	interface	0.0311111	3	0	0	1	0	-0.625189	3.73359	0.937341	10.5675	2.13154	-0.0380158	-9.60695	-4.61594	6.20224	-3.27421	-1.54707	2.97489	-3.07871	-5.65e-08	-7.08e-07	0.00224755
Q	8	M	Polar	Hydrophobic	6.24	5.74	-0.5	146	149	3	143.8	162.9	19.1	101	-5.4	B	B	P	N	L	B	373.789	374.949	378.268	loop	interface	interface	0.0311111	3	0	0	1	0	-0.801222	-3.7771	0.6238	10.9732	-1.06528	-0.00692126	-7.10863	-7.2341	0.749572	-1.93395	1.02087	0.224464	-1.2672	8.41e-05	0.00200078	-0.022236
Q	8	N	Polar	Polar	6.24	5.47	-0.77	146	132	-14	143.8	114.1	-29.7	46	0	B	S	P	P	L	L	373.789	374.949	378.268	loop	interface	interface	0.0311111	3	0	0	1	0	0.0818006	17.4106	1.01758	11.0467	6.12517	-0.0366225	-5.85018	7.33006	4.01341	-5.18477	-1.80336	0.752827	-3.87086	-5.65e-08	-7.08e-07	-0.000154436
Q	8	P	Polar	Special	6.24	6.3	0.06	146	115	-31	143.8	112.7	-31.1	76	-1.9	B	P	P	N	L	P	373.789	374.949	378.268	loop	interface	interface	0.0311111	3	0	0	1	0	1.49482	7.95623	7.10313	10.5969	6.64329	-0.0332124	-15.6206	1.92138	13.0388	-7.086	-8.53225	-0.0562467	-3.36549	-5.65e-08	-7.08e-07	-0.019049
Q	8	R	Polar	PositiveCharge	6.24	6.34	0.1	146	174	28	143.8	173.4	29.6	43	1	B	B	P	+	L	L	373.789	374.949	378.268	loop	interface	interface	0.0311111	3	0	0	1	1.36	-0.414413	17.6243	-3.95414	6.23823	-5.39548	0.887341	12.1914	-2.78888	7.88208	0.745734	0.847536	1.21083	1.49993	9.91e-05	-0.132502	-0.107957
Q	8	S	Polar	Polar	6.24	5.68	-0.56	146	105	-41	143.8	89	-54.8	68	-2.7	B	S	P	P	L	L	373.789	374.949	378.268	loop	interface	interface	0.0311111	3	0	0	1	0	0.315332	6.69891	-0.605494	8.67913	9.76345	-0.040607	-12.4873	11.718	-0.430426	-5.9381	-4.41409	0.468359	-4.02207	-5.65e-08	-7.08e-07	-0.0139876
Q	8	T	Polar	Polar	6.24	5.6	-0.64	146	119	-27	143.8	116.1	-27.7	42	-2.8	B	S	P	P	L	L	373.789	374.949	378.268	loop	interface	interface	0.0311111	3	0	0	1	0	1.04028	5.72622	0.529545	10.347	5.55425	-0.0192411	-8.25934	3.68005	-0.111064	-5.7923	-0.05324	-0.108898	-3.13222	-5.65e-08	-7.08e-07	-0.0405615
Q	8	V	Polar	Hydrophobic	6.24	5.61	-0.63	146	117	-29	143.8	140	-3.8	96	-7.7	B	S	P	N	L	B	373.789	374.949	378.268	loop	interface	interface	0.0311111	3	0	0	1	0	0.733069	-0.571863	0.993623	10.6969	3.34884	-0.0387998	-10.3544	-2.44797	3.73767	-6.11582	-0.105447	-0.261876	-2.47044	-5.65e-08	-7.08e-07	-0.0245452
Q	8	W	Polar	Hydrophobic	6.24	5.89	-0.35	146	204	58	143.8	227.8	84	130	-2.6	B	B	P	N	L	B	373.789	374.949	378.268	loop	interface	interface	0.0311111	3	0	0	1	0	-0.0558067	60.8464	0.685705	10.7465	-3.61477	-0.0139986	-2.22417	-9.01457	55.351	-2.55359	0.940894	10.5599	-2.02977	-5.65e-08	-7.08e-07	-0.0165282
Q	8	Y	Polar	Hydrophobic	6.24	5.66	-0.58	146	181	35	143.8	193.6	49.8	99	-2.2	B	B	P	N	L	B	373.789	374.949	378.268	loop	interface	interface	0.0311111	3	0	0	1	0	-0.358638	47.2632	0.510554	9.59271	-0.554688	-0.045016	-5.75375	-5.11201	40.0882	-2.62688	0.036288	11.1504	-2.95271	-5.65e-08	-7.08e-07	-0.0226373
K	9	A	PositiveCharge	Hydrophobic	9.74	6	-3.74	146	89	-57	168.6	88.6	-80	106	-5.7	B	S	+	N	L	B	372.599	372.208	374.008	loop	interface	interface	0.101695	4	0	0	0	-1.36	0.420111	2.84098	0.55073	10.6476	9.87573	4.7511	-23.1378	10.2548	-0.297086	-10.1777	-2.02843	1.55146	-1.64237	-0.0314434	0.881898	2.65e-10
K	9	C	PositiveCharge	Special	9.74	5.07	-4.67	146	121	-25	168.6	108.5	-60.1	202	-6.4	B	S	+	P	L	C	372.599	372.208	374.008	loop	interface	interface	0.101695	4	0	0	0	-1.36	0.363684	4.18367	-0.0908884	9.69324	6.77602	4.59155	-19.8522	7.24481	0.446456	-6.87611	-0.400941	1.8523	-1.14832	-0.0488488	0.848265	2.65e-10
K	9	E	PositiveCharge	negativeCharge	9.74	3.22	-6.52	146	147	1	168.6	138.4	-30.2	56	-0.4	B	B	+	-	L	L	372.599	372.208	374.008	loop	interface	interface	0.101695	4	0	0	0	-1.36	-0.586322	15.4801	-2.514	6.36936	4.15103	6.34393	-9.35029	4.88051	1.91909	-2.78527	2.43266	1.91827	-1.39424	-0.149709	2.26455	2.65e-10
K	9	F	PositiveCharge	Hydrophobic	9.74	3.32	-6.42	146	165	19	168.6	189.9	21.3	102	-6.7	B	B	+	N	L	B	372.599	372.208	374.008	loop	interface	interface	0.101695	4	0	0	0	-1.36	-0.972408	23.2228	-0.479206	15.1417	-3.40427	2.3739	-7.65811	-6.5901	27.6066	-5.03028	0.407117	-0.00911121	1.00389	-0.031334	0.895948	0
K	9	G	PositiveCharge	Special	9.74	3.29	-6.45	146	75	-71	168.6	60.1	-108.5	127	-3.5	B	S	+	N	L	B	372.599	372.208	374.008	loop	interface	interface	0.101695	4	0	0	0	-1.36	0.662038	5.60014	0.478955	9.58403	12.7955	4.66687	-27.6947	13.8287	0.402342	-10.8516	-0.179275	1.73283	-2.58615	-0.0312309	0.867762	2.65e-10
K	9	H	PositiveCharge	PositiveCharge	9.74	7.59	-2.15	146	155	9	168.6	153.2	-15.4	32	-0.7	B	B	+	+	L	L	372.599	372.208	374.008	loop	interface	interface	0.101695	4	0	0	0	-1.24	0.302207	5.37453	0.279546	2.76638	-0.0635604	0.934528	-1.60147	1.41307	2.30914	-4.95197	0.470493	2.01726	-0.252019	-0.011737	-0.237061	2.04992
K	9	I	PositiveCharge	Hydrophobic	9.74	6.02	-3.72	146	131	-15	168.6	166.7	-1.9	102	-8.4	B	B	+	N	L	B	372.599	372.208	374.008	loop	interface	interface	0.101695	4	0	0	0	-1.36	-0.0333061	8.21612	0.196334	10.4008	1.05917	4.56876	-11.1576	-2.24422	3.35648	-4.64187	-0.627923	6.48459	0.118837	-0.0480921	0.869731	2.65e-10
K	9	L	PositiveCharge	Hydrophobic	9.74	9.71	-0.03	146	131	-15	168.6	166.7	-1.9	107	-7.7	B	B	+	N	L	B	372.599	372.208	374.008	loop	interface	interface	0.101695	4	0	0	0	-1.36	-0.489181	0.890442	0.57522	11.0145	1.33434	4.42204	-11.6909	-1.73461	0.554323	-4.78605	-1.25973	1.6437	-0.770306	-0.0306405	0.848176	2.65e-10
K	9	P	PositiveCharge	Special	9.74	6.3	-3.44	146	115	-31	168.6	112.7	-55.9	103	-2.3	B	P	+	N	L	P	372.599	372.208	374.008	loop	interface	interface	0.101695	4	0	0	0	-1.36	-0.527748	15.9069	0.60027	12.486	5.77276	4.47862	-20.8304	3.94907	19.6487	-7.7008	-4.7313	1.43048	-1.62702	-0.0316003	0.834985	2.65e-10
K	9	Q	PositiveCharge	Polar	9.74	6.24	-3.5	146	146	0	168.6	143.8	-24.8	53	-0.4	B	B	+	P	L	L	372.599	372.208	374.008	loop	interface	interface	0.101695	4	0	0	0	-1.36	0.0875936	5.51835	0.745351	5.06708	3.32147	4.80599	-13.0965	4.31107	-0.309893	-1.35522	-0.30261	1.46489	-1.48738	-0.0306734	0.897374	2.65e-10
K	9	R	PositiveCharge	PositiveCharge	9.74	6.34	-3.4	146	174	28	168.6	173.4	4.8	26	0.6	B	B	+	+	L	L	372.599	372.208	374.008	loop	interface	interface	0.101695	4	0	0	0	0	-0.174298	6.60533	-0.286411	7.34788	-0.992321	0.375374	-2.47487	1.87467	-0.15525	-0.869507	0.496137	1.55357	-0.749504	0.115211	-0.379157	2.65e-10
K	9	S	PositiveCharge	Polar	9.74	5.68	-4.06	146	105	-41	168.6	89	-79.6	121	-3.1	B	S	+	P	L	L	372.599	372.208	374.008	loop	interface	interface	0.101695	4	0	0	0	-1.36	0.582934	7.61196	0.947387	4.92792	8.57585	4.85094	-18.9707	11.039	-0.514853	-7.46744	-2.03642	5.39797	-1.02128	-0.0296701	0.89198	2.65e-10
K	9	T	PositiveCharge	Polar	9.74	5.6	-4.14	146	119	-27	168.6	116.1	-52.5	78	-3.2	B	S	+	P	L	L	372.599	372.208	374.008	loop	interface	interface	0.101695	4	0	0	0	-1.36	0.429581	8.48229	0.372573	7.48947	5.95059	4.66963	-15.0095	7.28702	2.03859	-6.19149	-1.08284	2.07894	-1.00125	-0.0305849	0.909878	2.65e-10
K	9	V	PositiveCharge	Hydrophobic	9.74	5.61	-4.13	146	117	-29	168.6	140	-28.6	97	-8.1	B	S	+	N	L	B	372.599	372.208	374.008	loop	interface	interface	0.101695	4	0	0	0	-1.36	0.455213	8.83295	0.663001	12.5056	3.92357	4.25138	-13.6779	2.68209	1.10852	-7.07169	-0.459201	4.06688	-0.075516	-0.0315973	0.872337	2.65e-10
K	9	W	PositiveCharge	Hydrophobic	9.74	5.89	-3.85	146	204	58	168.6	227.8	59.2	110	-3	B	B	+	N	L	B	372.599	372.208	374.008	loop	interface	interface	0.101695	4	0	0	0	-1.36	-0.276714	23.3225	0.328836	11.1917	-4.9289	4.07473	-2.86424	-6.60145	20.7119	-4.68563	1.50064	3.80341	1.09099	-0.031934	0.823484	2.65e-10
K	9	Y	PositiveCharge	Hydrophobic	9.74	5.66	-4.08	146	181	35	168.6	193.6	25	85	-2.6	B	B	+	N	L	B	372.599	372.208	374.008	loop	interface	interface	0.101695	4	0	0	0	-1.36	-0.360868	40.6359	3.08296	7.3139	-4.27261	2.33578	-3.1119	-5.54604	40.5595	-4.44854	0.936005	2.95486	1.21036	-0.0463916	0.878425	2.65e-10
T	10	A	Polar	Hydrophobic	5.6	6	0.4	119	89	-30	116.1	88.6	-27.5	58	-2.5	S	S	P	N	L	B	371.947	371.577	373.417	loop	interface	interface	0.511628	1	0	0	1	0	-0.259729	-2.54661	1.3478	1.36059	0.310055	-0.016619	-0.990033	0.0484602	-1.4646	-1.50534	-1.22669	-0.410224	0.0877476	0	0	0
T	10	C	Polar	Special	5.6	5.07	-0.53	119	121	2	116.1	108.5	-7.6	149	-3.2	S	S	P	P	L	C	371.947	371.577	373.417	loop	interface	interface	0.511628	1	0	0	1	0	-0.48244	-2.81419	1.34978	1.36024	-0.306431	-0.007887	0.0359214	-0.367598	-1.63023	-0.944582	-1.89013	-0.413282	0.100275	0	0	0
T	10	D	Polar	negativeCharge	5.6	5.05	-0.55	119	133	14	116.1	111.1	-5	85	2.8	S	S	P	-	L	L	371.947	371.577	373.417	loop	interface	interface	0.511628	1	0	0	1	0	-1.05173	-3.89155	0.618759	0.657098	-0.14145	-0.255731	0.128167	-0.298726	-1.21488	-0.494372	-2.59305	-0.798007	0.021821	0	0.500646	0
T	10	E	Polar	negativeCharge	5.6	3.22	-2.38	119	147	28	116.1	138.4	22.3	65	2.8	S	B	P	-	L	L	371.947	371.577	373.417	loop	interface	interface	0.511628	1	0	0	1	0	-0.53569	-3.31661	1.32856	1.35854	-1.11868	-0.148159	1.03243	-1.74425	-1.53978	-0.476665	-1.97265	-0.378945	0.0801953	0	0.342991	0
T	10	F	Polar	Hydrophobic	5.6	3.32	-2.28	119	165	46	116.1	189.9	73.8	103	-3.5	S	B	P	N	L	B	371.947	371.577	373.417	loop	interface	interface	0.511628	1	0	0	1	0	0.731734	-0.760713	1.53534	1.87184	-5.01965	-0.00226314	5.06555	-6.52837	-1.51378	0.737512	3.58428	-0.491163	0.111041	0	0	0
T	10	G	Polar	Special	5.6	3.29	-2.31	119	75	-44	116.1	60.1	-56	59	-0.3	S	S	P	N	L	B	371.947	371.577	373.417	loop	interface	interface	0.511628	1	0	0	1	0	-0.825626	-6.23662	1.36196	1.36151	1.10601	-0.0419522	-1.99236	1.17813	-1.75546	-1.50626	-5.54002	-0.408175	-0.0534761	0	0	0
T	10	H	Polar	PositiveCharge	5.6	7.59	1.99	119	155	36	116.1	153.2	37.1	47	2.5	S	B	P	+	L	L	371.947	371.577	373.417	loop	interface	interface	0.511628	1	0	0	1	0.12	-0.393824	-2.41528	-1.34904	-1.43232	-2.48517	0.287113	6.20661	-1.83321	-1.7427	1.89103	-2.57492	-0.196003	0.0972408	0	-0.255395	1.06872
T	10	I	Polar	Hydrophobic	5.6	6.02	0.42	119	131	12	116.1	166.7	50.6	89	-5.2	S	B	P	N	L	B	371.947	371.577	373.417	loop	interface	interface	0.511628	1	0	0	1	0	1.70826	4.74912	0.651204	2.28836	-1.95183	-0.0263743	1.66937	-3.60615	1.82038	-0.41271	4.70643	-0.388522	0.119185	0.0139054	-0.0149457	2.65e-10
T	10	K	Polar	PositiveCharge	5.6	9.74	4.14	119	146	27	116.1	168.6	52.5	78	3.2	S	B	P	+	L	L	371.947	371.577	373.417	loop	interface	interface	0.511628	1	0	0	1	1.36	1.085	0.116878	1.1342	2.64625	-1.4423	-0.0882276	-0.409	-3.50525	-1.44943	-0.353187	4.70257	-0.838412	0.0747635	0.0136671	-0.294011	2.65e-10
T	10	L	Polar	Hydrophobic	5.6	9.71	4.11	119	131	12	116.1	166.7	50.6	92	-4.5	S	B	P	N	L	B	371.947	371.577	373.417	loop	interface	interface	0.511628	1	0	0	1	0	0.728735	-1.79996	1.32577	1.41125	-2.71994	-0.0909696	1.18329	-5.62172	-1.09189	0.318447	4.07819	-0.592381	0.445254	2.91e-09	7.66e-07	-2.65e-10
T	10	M	Polar	Hydrophobic	5.6	5.74	0.14	119	149	30	116.1	162.9	46.8	81	-2.6	S	B	P	N	L	B	371.947	371.577	373.417	loop	interface	interface	0.511628	1	0	0	1	0	-1.50896	-9.41499	3.7616	4.13136	-6.34606	-0.00164596	3.64809	-10.8362	-1.08952	0.257067	-1.07338	-1.86631	0.504569	-7.42e-09	-7.7e-07	2.65e-10
T	10	N	Polar	Polar	5.6	5.47	-0.13	119	132	13	116.1	114.1	-2	65	2.8	S	S	P	P	L	L	371.947	371.577	373.417	loop	interface	interface	0.511628	1	0	0	1	0	-0.656583	-4.73696	1.22416	1.1715	-0.687545	-0.00778342	0.840743	-0.650145	-0.949517	-0.636778	-4.25734	-0.784253	0.0205655	2.91e-09	7.66e-07	-2.65e-10
T	10	P	Polar	Special	5.6	6.3	0.7	119	115	-4	116.1	112.7	-3.4	38	0.9	S	P	P	N	L	P	371.947	371.577	373.417	loop	interface	interface	0.511628	1	0	0	1	0	1.99056	2.72024	1.27057	1.3614	-1.34174	-0.0476013	0.172174	-2.41949	2.53551	-0.683854	2.26226	-0.388986	0.0766662	2.91e-09	7.66e-07	-2.65e-10
T	10	Q	Polar	Polar	5.6	6.24	0.64	119	146	27	116.1	143.8	27.7	42	2.8	S	B	P	P	L	L	371.947	371.577	373.417	loop	interface	interface	0.511628	1	0	0	1	0	1.2958	1.73936	1.35429	1.19678	-1.95903	-0.00788983	2.22367	-2.71299	-1.56776	0.185051	3.25794	-0.230701	0.127866	2.91e-09	7.66e-07	-2.02e-06
T	10	R	Polar	PositiveCharge	5.6	6.34	0.74	119	174	55	116.1	173.4	57.3	71	3.8	S	B	P	+	L	L	371.947	371.577	373.417	loop	interface	interface	0.511628	1	0	0	1	1.36	-0.584377	-6.08115	1.17137	-4.88719	-3.73221	-0.00292086	4.842	-4.05593	-1.44103	4.05722	-1.88348	0.165449	0.132372	2.91e-09	-0.314438	-5.03e-06
T	10	S	Polar	Polar	5.6	5.68	0.08	119	105	-14	116.1	89	-27.1	58	0.1	S	S	P	P	L	L	371.947	371.577	373.417	loop	interface	interface	0.511628	1	0	0	1	0	-0.592252	-6.21538	-0.886933	-1.01972	-0.259114	-0.007887	0.638943	0.159502	-1.46325	0.698493	-3.50697	-0.568439	0.123707	0	0	0
T	10	V	Polar	Hydrophobic	5.6	5.61	0.01	119	117	-2	116.1	140	23.9	69	-4.9	S	S	P	N	L	B	371.947	371.577	373.417	loop	interface	interface	0.511628	1	0	0	1	0	0.366131	2.23776	1.8706	1.87833	-0.273475	0	0.587197	-0.529136	1.87044	-1.82636	-1.05775	-0.282097	-0.0491139	0	0	0
T	10	W	Polar	Hydrophobic	5.6	5.89	0.29	119	204	85	116.1	227.8	111.7	128	0.2	S	B	P	N	L	B	371.947	371.577	373.417	loop	interface	interface	0.511628	1	0	0	1	0	-0.522877	-3.10071	1.32368	0.439434	-2.00595	-0.0593768	2.76678	-2.38763	-1.04079	0.170075	-1.59392	-0.713	0.0913055	2.91e-09	7.66e-07	-2.65e-10
T	10	Y	Polar	Hydrophobic	5.6	5.66	0.06	119	181	62	116.1	193.6	77.5	92	0.6	S	B	P	N	L	B	371.947	371.577	373.417	loop	interface	interface	0.511628	1	0	0	1	0	0.367768	-2.51493	1.51744	-2.69231	-4.49306	-0.00243745	4.64912	-5.62047	-1.23225	2.27459	3.96401	-0.879572	0.0645	0	0	0
G	11	A	Special	Hydrophobic	3.29	6	2.71	75	89	14	60.1	88.6	28.5	60	-2.2	S	S	N	N	B	B	369.707	369.309	370.753	loop	surface	surface.internal	0.490385	0	0	0	0	0	-0.026112	1.20572	-0.0552202	-0.102544	-2.50264	-0.58583	2.43518	-4.32598	3.17872	0.0180173	2.26159	0.884436	0.136801	-2.91e-09	-7.66e-07	2.65e-10
G	11	C	Special	Special	3.29	5.07	1.78	75	121	46	60.1	108.5	48.4	159	-2.9	S	S	N	P	B	C	369.707	369.309	370.753	loop	surface	surface.internal	0.490385	0	0	0	0	0	-0.0553344	4.22776	-1.01228	-0.695698	-5.6029	-1.20709	5.05213	-7.76794	6.43408	3.52978	2.53771	2.95562	0.392817	-2.91e-09	0.00433809	2.65e-10
G	11	D	Special	negativeCharge	3.29	5.05	1.76	75	133	58	60.1	111.1	51	94	3.1	S	S	N	-	B	L	369.707	369.309	370.753	loop	surface	surface.internal	0.490385	0	0	0	0	0	-0.210063	9.00077	0.652338	0.593059	-2.83145	2.10459	4.6389	-4.62507	2.97953	0.806508	2.09115	1.93998	0.135774	-0.0171919	0.668004	0.000436135
G	11	E	Special	negativeCharge	3.29	3.22	-0.07	75	147	72	60.1	138.4	78.3	98	3.1	S	B	N	-	B	L	369.707	369.309	370.753	loop	surface	surface.internal	0.490385	0	0	0	0	0	-0.310219	15.8973	-1.16192	-0.801715	-8.27871	1.21582	15.2508	-11.2727	6.48396	6.10443	3.58244	3.94159	0.545585	-2.91e-09	0.8333	2.65e-10
G	11	H	Special	PositiveCharge	3.29	7.59	4.3	75	155	80	60.1	153.2	93.1	98	2.8	S	B	N	+	B	L	369.707	369.309	370.753	loop	surface	surface.internal	0.490385	0	0	0	0	0.12	-0.153875	37.7866	-0.053629	-1.85828	-8.56974	-2.72295	13.6916	-10.3145	38.2326	4.16491	3.16147	1.63938	0.163232	0	5.33e-14	0.415824
G	11	I	Special	Hydrophobic	3.29	6.02	2.73	75	131	56	60.1	166.7	106.6	135	-4.9	S	B	N	N	B	B	369.707	369.309	370.753	loop	surface	surface.internal	0.490385	0	0	0	0	0	-0.0371685	9.22272	1.54225	2.79262	-8.81549	-0.977556	7.40728	-15.6942	9.9146	3.85522	2.17711	7.04399	0.502301	-0.0540622	0.0309595	2.65e-10
G	11	K	Special	PositiveCharge	3.29	9.74	6.45	75	146	71	60.1	168.6	108.5	127	3.5	S	B	N	+	B	L	369.707	369.309	370.753	loop	surface	surface.internal	0.490385	0	0	0	0	1.36	-0.169046	10.4487	-2.16332	-4.05671	-9.09675	-3.32934	16.797	-12.6725	5.75662	8.23158	4.21694	7.26639	0.503845	-2.91e-09	-0.501284	2.45e-05
G	11	L	Special	Hydrophobic	3.29	9.71	6.42	75	131	56	60.1	166.7	106.6	138	-4.2	S	B	N	N	B	B	369.707	369.309	370.753	loop	surface	surface.internal	0.490385	0	0	0	0	0	-0.0671139	16.2327	-0.397799	0.133024	-9.83125	-1.78246	9.3517	-17.005	16.9161	4.60979	3.56379	10.699	0.638544	-0.0172195	-0.00703463	2.65e-10
G	11	N	Special	Polar	3.29	5.47	2.18	75	132	57	60.1	114.1	54	80	3.1	S	S	N	P	B	L	369.707	369.309	370.753	loop	surface	surface.internal	0.490385	0	0	0	0	0	-0.339305	8.03572	1.40349	-4.29394	-4.65427	1.07732	6.1892	-6.10024	5.08721	4.02119	1.56422	3.65009	0.166606	-2.91e-09	0.0914481	2.65e-10
G	11	P	Special	Special	3.29	6.3	3.01	75	115	40	60.1	112.7	52.6	42	1.2	S	P	N	N	B	P	369.707	369.309	370.753	loop	surface	surface.internal	0.490385	0	0	0	0	0	0.139068	4.25626	1.32328	1.25455	-4.3942	-1.05193	4.21308	-7.3903	7.38697	0.140085	0.688863	2.08587	0.13834	-2.91e-09	-7.66e-07	-6.87e-06
G	11	Q	Special	Polar	3.29	6.24	2.95	75	146	71	60.1	143.8	83.7	87	3.1	S	B	N	P	B	L	369.707	369.309	370.753	loop	surface	surface.internal	0.490385	0	0	0	0	0	-0.449761	12.6901	-1.84019	-5.41772	-10.335	-1.77334	15.5375	-12.3743	11.1041	7.90081	3.76346	6.12469	0.646421	-2.91e-09	5.16e-05	2.65e-10
G	11	R	Special	PositiveCharge	3.29	6.34	3.05	75	174	99	60.1	173.4	113.3	125	4.1	S	B	N	+	B	L	369.707	369.309	370.753	loop	surface	surface.internal	0.490385	0	0	0	0	1.36	0.000497084	15.7627	-4.91381	-5.14851	-14.9008	-7.56172	25.0394	-14.937	17.0914	8.8871	4.93769	8.16451	1.36998	-0.0173663	-0.878184	-2.07e-05
G	11	S	Special	Polar	3.29	5.68	2.39	75	105	30	60.1	89	28.9	56	0.4	S	S	N	P	B	L	369.707	369.309	370.753	loop	surface	surface.internal	0.490385	0	0	0	0	0	0.0151325	-0.862885	-0.0475353	-8.33644	-3.41344	-0.742188	5.43665	-3.44362	2.9026	2.67748	2.24783	1.85718	0.155392	-2.91e-09	-0.00140563	2.65e-10
G	11	T	Special	Polar	3.29	5.6	2.31	75	119	44	60.1	116.1	56	59	0.3	S	S	N	P	B	L	369.707	369.309	370.753	loop	surface	surface.internal	0.490385	0	0	0	0	0	-0.0289637	-1.52413	-0.190397	-7.49692	-5.77536	-1.3476	7.83791	-8.33976	6.27089	2.60902	2.88755	2.02067	0.291102	-2.91e-09	-0.000140167	2.65e-10
G	11	V	Special	Hydrophobic	3.29	5.61	2.32	75	117	42	60.1	140	79.9	109	-4.6	S	S	N	N	B	B	369.707	369.309	370.753	loop	surface	surface.internal	0.490385	0	0	0	0	0	-0.0642528	9.54664	0.452666	1.08426	-6.8079	-1.47226	6.38823	-11.7188	12.1088	1.97908	2.47024	5.08186	0.454156	-0.0192957	-0.00024727	2.65e-10
I	25	A	Hydrophobic	Hydrophobic	6.02	6	-0.02	131	89	-42	166.7	88.6	-78.1	94	2.7	B	S	N	N	B	B	373.746	374.492	376.243	loop	interface	interface	0.593909	3	0	0	1	-16.64	0.238798	1.44105	0.0863123	0.302022	3.04034	2.82e-06	-3.61159	3.78729	-0.315757	-1.62	0.261689	-0.463503	-0.219419	-2.91e-09	-7.66e-07	-0.0257421
I	25	C	Hydrophobic	Special	6.02	5.07	-0.95	131	121	-10	166.7	108.5	-58.2	198	2	B	S	N	P	B	C	373.746	374.492	376.243	loop	interface	interface	0.593909	3	0	0	1	-16.64	0.250455	1.49471	-0.200515	0.0305036	1.62425	0	-2.18352	2.64131	0.194437	-0.190266	0.0606948	-0.476008	-0.150689	0	0	-0.0061791
I	25	D	Hydrophobic	negativeCharge	6.02	5.05	-0.97	131	133	2	166.7	111.1	-55.6	168	8	B	S	N	-	B	L	373.746	374.492	376.243	loop	interface	interface	0.593909	3	0	0	1	-16.64	0.203434	0.349776	-3.55213	-3.31874	0.723708	-0.0691369	3.275	2.27691	-0.0951552	1.30249	-0.0125263	-0.0651125	-0.0484835	0	-0.114534	-0.00100704
I	25	E	Hydrophobic	negativeCharge	6.02	3.22	-2.8	131	147	16	166.7	138.4	-28.3	134	8	B	B	N	-	B	L	373.746	374.492	376.243	loop	interface	interface	0.593909	3	0	0	1	-16.64	-0.487485	-1.87518	-4.29672	-4.10034	2.54612	-0.0425926	-2.80102	3.428	-0.255234	3.42174	0.611633	-0.374731	-0.211679	0	0.0134627	-0.0254903
I	25	G	Hydrophobic	Special	6.02	3.29	-2.73	131	75	-56	166.7	60.1	-106.6	135	4.9	B	S	N	N	B	B	373.746	374.492	376.243	loop	interface	interface	0.593909	3	0	0	1	-16.64	0.256397	2.29533	0.107638	0.408374	4.39343	0	-5.52144	5.2979	-0.292497	-1.66806	-0.472231	0.0674966	-0.345044	0	0	-0.0252896
I	25	H	Hydrophobic	PositiveCharge	6.02	7.59	1.57	131	155	24	166.7	153.2	-13.5	94	7.7	B	B	N	+	B	L	373.746	374.492	376.243	loop	interface	interface	0.593909	3	0	0	1	-16.52	0.301652	1.9113	0.0990306	0.199834	2.89847	-8.53e-14	-3.31622	3.72673	-0.27988	-1.27774	0.0252953	-0.382618	-0.250235	0	-3.55e-15	0.218402
I	25	K	Hydrophobic	PositiveCharge	6.02	9.74	3.72	131	146	15	166.7	168.6	1.9	102	8.4	B	B	N	+	B	L	373.746	374.492	376.243	loop	interface	interface	0.593909	3	0	0	1	-15.3	0.0246047	0.259093	0.0555553	-2.55448	0.514185	0.12545	-0.362748	0.615761	-0.0965904	1.87129	0.299692	-0.118344	-0.028694	-1.78e-15	-0.065191	-0.025481
I	25	L	Hydrophobic	Hydrophobic	6.02	9.71	3.69	131	131	0	166.7	166.7	0	5	0.7	B	B	N	N	B	B	373.746	374.492	376.243	loop	interface	interface	0.593909	3	0	0	1	-8.96	0.143201	0.412495	-0.158148	0.037376	-0.666059	0	1.28401	-0.78757	0.0586232	0.573135	0.451359	-0.38625	0.0163357	0	0	0.00602288
I	25	N	Hydrophobic	Polar	6.02	5.47	-0.55	131	132	1	166.7	114.1	-52.6	149	8	B	S	N	P	B	L	373.746	374.492	376.243	loop	interface	interface	0.593909	3	0	0	1	-16.64	0.292704	0.852213	0.0539099	-6.25984	1.14853	-2.82e-06	-0.0789808	2.6644	-0.119142	1.8959	0.389127	1.1862	0.0172736	2.91e-09	7.66e-07	-0.0278997
I	25	P	Hydrophobic	Special	6.02	6.3	0.28	131	115	-16	166.7	112.7	-54	95	6.1	B	P	N	N	B	P	373.746	374.492	376.243	loop	interface	interface	0.593909	3	0	0	1	-16.64	0.0313375	-0.580254	-0.066831	0.161003	1.68522	0	-1.81362	1.93849	-0.268958	-0.721802	0.286303	-1.75456	-0.0260872	0	0	-0.0254986
I	25	Q	Hydrophobic	Polar	6.02	6.24	0.22	131	146	15	166.7	143.8	-22.9	109	8	B	B	N	P	B	L	373.746	374.492	376.243	loop	interface	interface	0.593909	3	0	0	1	-16.64	-0.113295	-0.30934	-3.0061	-2.81666	2.62794	0	-2.68852	3.66785	-0.255254	1.96838	0.640464	-0.421951	-0.198064	0	0	-0.0254906
I	25	R	Hydrophobic	PositiveCharge	6.02	6.34	0.32	131	174	43	166.7	173.4	6.7	97	9	B	B	N	+	B	L	373.746	374.492	376.243	loop	interface	interface	0.593909	3	0	0	1	-15.3	0.0596213	0.752075	0.0963058	-2.06397	1.41671	0.129482	-1.38331	2.23241	-0.245481	0.644344	0.0727312	0.0359962	-0.152333	0.0149653	-0.172606	-0.0254959
I	25	S	Hydrophobic	Polar	6.02	5.68	-0.34	131	105	-26	166.7	89	-77.7	142	5.3	B	S	N	P	B	L	373.746	374.492	376.243	loop	interface	interface	0.593909	3	0	0	1	-16.64	0.32362	2.65145	0.0977584	0.310924	3.12419	0	-3.42789	4.44626	-0.246324	-1.33332	0.206856	-0.501535	-0.231053	0	0	-0.025475
I	25	T	Hydrophobic	Polar	6.02	5.6	-0.42	131	119	-12	166.7	116.1	-50.6	89	5.2	B	S	N	P	B	L	373.746	374.492	376.243	loop	interface	interface	0.593909	3	0	0	1	-16.64	0.355859	1.47485	0.0137957	0.202582	1.45977	0	-1.40191	2.15814	0.042214	-0.659126	-0.0156248	-0.324835	-0.0559512	0	0	-0.000147132
I	25	V	Hydrophobic	Hydrophobic	6.02	5.61	-0.41	131	117	-14	166.7	140	-26.7	29	0.3	B	S	N	N	B	B	373.746	374.492	376.243	loop	interface	interface	0.593909	3	0	0	1	0.86	0.361082	1.91307	-0.048156	0.0983445	0.879152	0	-0.648898	1.43551	0.397898	-0.425349	0.0129171	0.211698	0.00585508	0	0	-4.55e-05
I	25	W	Hydrophobic	Hydrophobic	6.02	5.89	-0.13	131	204	73	166.7	227.8	61.1	61	5.4	B	B	N	N	B	B	373.746	374.492	376.243	loop	interface	interface	0.593909	3	0	0	1	-7.66	0.184852	-0.718288	0.0619897	0.00754015	-0.141099	-0.219326	0.0869103	-0.189411	-0.254582	0.32912	-0.219649	-0.386784	0.322198	0	0	0.207003
I	25	Y	Hydrophobic	Hydrophobic	6.02	5.66	-0.36	131	181	50	166.7	193.6	26.9	33	5.8	B	B	N	N	B	B	373.746	374.492	376.243	loop	interface	interface	0.593909	3	0	0	1	-8.71	0.262061	0.738839	-0.347659	-0.316282	2.10305	2.82e-06	-2.83482	2.61355	-0.119251	-0.28996	0.464706	-0.506128	-0.258061	-2.91e-09	-7.66e-07	-0.0283689
H	26	A	PositiveCharge	Hydrophobic	7.59	6	-1.59	155	89	-66	153.2	88.6	-64.6	86	-5	B	S	+	N	L	B	374.427	373.47	376.804	strand	surface	surface.internal	0.254464	0	0	0	0	174.17	0.120262	2.53195	2.92165	2.60114	5.32346	1.14e-13	-7.46676	5.76609	0.204629	-5.37687	-0.992501	-0.00905517	-0.51253	0	1.07e-14	-0.439848
H	26	E	PositiveCharge	negativeCharge	7.59	3.22	-4.37	155	147	-8	153.2	138.4	-14.8	40	0.3	B	B	+	-	L	L	374.427	373.47	376.804	strand	surface	surface.internal	0.254464	0	0	0	0	-16.76	-0.129002	-0.745803	-0.179704	-0.354917	2.64694	-0.416489	-3.47035	2.37416	0.0872576	0.330854	-1.30585	0.316905	-0.00447507	0	-0.349841	-0.424778
H	26	F	PositiveCharge	Hydrophobic	7.59	3.32	-4.27	155	165	10	153.2	189.9	36.7	100	-6	B	B	+	N	L	B	374.427	373.47	376.804	strand	surface	surface.internal	0.254464	0	0	0	0	569.26	-0.797386	-2.88944	2.64076	2.60783	0.285452	-2.82e-06	-3.32383	-1.55143	0.33379	-1.3558	-2.54628	0.461501	0.213669	2.91e-09	7.66e-07	-0.441431
H	26	G	PositiveCharge	Special	7.59	3.29	-4.3	155	75	-80	153.2	60.1	-93.1	98	-2.8	B	S	+	N	L	B	374.427	373.47	376.804	strand	surface	surface.internal	0.254464	0	0	0	0	6.55	-0.543055	0.188645	3.22022	2.59825	7.61608	-1.99e-13	-9.88205	9.28215	-4.38058	-5.80331	-1.95957	-0.0625755	-0.921326	0	-3.55e-15	-0.439964
H	26	K	PositiveCharge	PositiveCharge	7.59	9.74	2.15	155	146	-9	153.2	168.6	15.4	32	0.7	B	B	+	+	L	L	374.427	373.47	376.804	strand	surface	surface.internal	0.254464	0	0	0	0	-15.42	-0.530424	-1.32472	2.22104	2.12961	2.71826	0.0972777	-4.87373	1.79606	0.180546	-2.64449	-2.7022	0.0575445	0.0970688	0	0.103053	-0.407688
H	26	L	PositiveCharge	Hydrophobic	7.59	9.71	2.12	155	131	-24	153.2	166.7	13.5	99	-7	B	B	+	N	L	B	374.427	373.47	376.804	strand	surface	surface.internal	0.254464	0	0	0	0	480.75	-0.602958	-1.83093	2.61528	2.60689	1.33791	-5.68e-14	-3.79398	-0.644117	0.753499	-2.40631	-1.94031	0.0806394	0.229715	0	1.07e-14	-0.440428
H	26	P	PositiveCharge	Special	7.59	6.3	-1.29	155	115	-40	153.2	112.7	-40.5	77	-1.6	B	P	+	N	L	P	374.427	373.47	376.804	strand	surface	surface.internal	0.254464	0	0	0	0	-16.76	0.474507	1.33739	2.9262	2.5966	4.91188	-2.82e-06	-8.97769	4.72205	-4.01219	-3.90612	3.41186	0.105373	-0.274351	2.91e-09	7.66e-07	-0.440568
H	26	R	PositiveCharge	PositiveCharge	7.59	6.34	-1.25	155	174	19	153.2	173.4	20.2	29	1.3	B	B	+	+	L	L	374.427	373.47	376.804	strand	surface	surface.internal	0.254464	0	0	0	0	-15.42	-0.369053	0.165332	2.27734	2.1333	2.8131	0.279307	-5.21694	2.20882	0.158171	-2.63185	-2.13801	0.391127	0.00634927	0	0.298508	-0.407536
H	26	S	PositiveCharge	Polar	7.59	5.68	-1.91	155	105	-50	153.2	89	-64.2	89	-2.4	B	S	+	P	L	L	374.427	373.47	376.804	strand	surface	surface.internal	0.254464	0	0	0	0	17.41	0.133867	2.01655	0.653853	0.158321	4.78982	2.84e-14	-4.94051	7.0934	-0.472888	-2.2637	-2.61102	0.0168556	-0.444511	0	0	-0.407581
H	26	T	PositiveCharge	Polar	7.59	5.6	-1.99	155	119	-36	153.2	116.1	-37.1	47	-2.5	B	S	+	P	L	L	374.427	373.47	376.804	strand	surface	surface.internal	0.254464	0	0	0	0	130.03	0.15709	2.30609	2.76406	2.61273	3.9288	-8.53e-14	-4.20468	4.7605	0.837905	-3.85965	-4.11508	0.0217901	-0.155433	0	0	-0.440296
H	26	V	PositiveCharge	Hydrophobic	7.59	5.61	-1.98	155	117	-38	153.2	140	-13.2	84	-7.4	B	S	+	N	L	B	374.427	373.47	376.804	strand	surface	surface.internal	0.254464	0	0	0	0	563.57	-0.18154	-1.42426	2.56564	2.61148	2.58904	-1.71e-13	-4.44678	1.7645	1.10163	-3.18629	-4.00743	0.0248417	0.075572	0	1.07e-14	-0.440887
H	26	W	PositiveCharge	Hydrophobic	7.59	5.89	-1.7	155	204	49	153.2	227.8	74.6	115	-2.3	B	B	+	N	L	B	374.427	373.47	376.804	strand	surface	surface.internal	0.254464	0	0	0	0	624	-0.3078	-3.88781	0.32052	0.489939	-1.97492	2.82e-06	0.540572	-3.53438	0.201526	0.288281	0.0542708	0.167055	0.10838	-2.91e-09	-7.66e-07	-0.440684
Y	27	A	Hydrophobic	Hydrophobic	5.66	6	0.34	181	89	-92	193.6	88.6	-105	112	-3.1	B	S	N	N	B	B	377.21	376.197	377.517	strand	interface	interface	0.0760456	1	0	0	1	-14.77	0.675123	12.5914	0.729898	5.22157	12.8388	7.27e-05	-13.3011	16.1006	-0.916126	-7.38735	-0.0780509	-0.616972	-1.64462	0	0	0
Y	27	C	Hydrophobic	Special	5.66	5.07	-0.59	181	121	-60	193.6	108.5	-85.1	194	-3.8	B	S	N	P	B	C	377.21	376.197	377.517	strand	interface	interface	0.0760456	1	0	0	1	-12.03	0.655075	11.886	-0.179697	4.74935	9.68268	-0.00030797	-10.2699	12.9978	-0.226339	-3.84097	-0.50359	-0.522938	-0.9663	0	0	-3.55e-15
Y	27	G	Hydrophobic	Special	5.66	3.29	-2.37	181	75	-106	193.6	60.1	-133.5	147	-0.9	B	S	N	N	B	B	377.21	376.197	377.517	strand	interface	interface	0.0760456	1	0	0	1	-16.64	0.758299	18.3313	1.4484	5.68431	16.5184	0.283832	-17.6025	21.276	-1.30915	-7.50198	0.229094	-0.697537	-2.25427	-0.000497009	-0.00576222	0.0086024
Y	27	H	Hydrophobic	PositiveCharge	5.66	7.59	1.93	181	155	-26	193.6	153.2	-40.4	83	1.9	B	B	N	+	B	L	377.21	376.197	377.517	strand	interface	interface	0.0760456	1	0	0	1	-16.52	0.973741	13.5522	2.68736	5.27837	4.06636	-0.145475	0.23205	6.89493	-0.304254	-3.4154	-2.03459	-0.267928	-0.549414	-0.000876406	0.00536864	0.556256
Y	27	I	Hydrophobic	Hydrophobic	5.66	6.02	0.36	181	131	-50	193.6	166.7	-26.9	33	-5.8	B	B	N	N	B	B	377.21	376.197	377.517	strand	interface	interface	0.0760456	1	0	0	1	19.77	0.766582	13.3446	-0.0869921	5.77982	3.75892	0.525366	-4.28417	2.15099	4.24779	-2.41661	-0.229726	3.898	0.215314	-0.0102065	0.0113942	2.65e-05
Y	27	L	Hydrophobic	Hydrophobic	5.66	9.71	4.05	181	131	-50	193.6	166.7	-26.9	36	-5.1	B	B	N	N	B	B	377.21	376.197	377.517	strand	interface	interface	0.0760456	1	0	0	1	-0.03	0.640228	3.12506	2.02115	4.53178	2.95854	0.522324	-4.39891	0.690172	-0.291934	-1.93188	-0.846388	-0.0958508	0.65859	-0.0268389	-0.00710648	2.68e-10
Y	27	P	Hydrophobic	Special	5.66	6.3	0.64	181	115	-66	193.6	112.7	-80.9	110	0.3	B	P	N	N	B	P	377.21	376.197	377.517	strand	interface	interface	0.0760456	1	0	0	1	-16.64	3.64317	22.2066	7.2091	5.65638	9.00442	0.00266274	-12.009	9.09896	6.38931	-6.13149	3.29611	-0.315395	-1.25646	0.000606069	-0.000328793	0.00523486
Y	27	Q	Hydrophobic	Polar	5.66	6.24	0.58	181	146	-35	193.6	143.8	-49.8	99	2.2	B	B	N	P	B	L	377.21	376.197	377.517	strand	interface	interface	0.0760456	1	0	0	1	-16.64	0.771458	14.5901	1.57168	4.62235	5.07077	-0.248833	-1.59216	8.0904	-0.727286	-0.670124	-1.10394	-0.407804	-0.483533	0.00118245	-0.0161218	2.68e-10
Y	27	R	Hydrophobic	PositiveCharge	5.66	6.34	0.68	181	174	-7	193.6	173.4	-20.2	77	3.2	B	B	N	+	B	L	377.21	376.197	377.517	strand	interface	interface	0.0760456	1	0	0	1	-15.3	0.514861	11.1657	-2.55801	-0.630152	0.343525	1.63044	7.33943	5.25071	-0.268748	1.81504	-2.39252	0.293593	0.67652	0.00109347	0.341265	2.68e-10
Y	27	T	Hydrophobic	Polar	5.66	5.6	-0.06	181	119	-62	193.6	116.1	-77.5	92	-0.6	B	S	N	P	B	L	377.21	376.197	377.517	strand	interface	interface	0.0760456	1	0	0	1	-15.31	0.623171	6.97365	-2.37118	1.59175	8.9609	0.502557	-6.66289	12.3741	-0.746532	-4.65226	-1.53351	-0.45934	-0.920437	-0.0155019	-0.0144658	2.68e-10
Y	27	V	Hydrophobic	Hydrophobic	5.66	5.61	-0.05	181	117	-64	193.6	140	-53.6	55	-5.5	B	S	N	N	B	B	377.21	376.197	377.517	strand	interface	interface	0.0760456	1	0	0	1	21.67	0.734324	9.55636	0.505302	5.0752	6.78105	0.691365	-6.68329	7.18818	1.98544	-4.99899	-2.18743	1.19463	-0.22661	-0.0021418	0.00699798	6.41e-05
Y	27	W	Hydrophobic	Hydrophobic	5.66	5.89	0.23	181	204	23	193.6	227.8	34.2	37	-0.4	B	B	N	N	B	B	377.21	376.197	377.517	strand	interface	interface	0.0760456	1	0	0	1	-2.24	0.467217	2.18837	1.68299	6.92486	-0.468752	-0.366448	2.11345	-0.791908	-0.192653	-5.0353	-1.67972	0.00185171	0.511542	-2.92e-09	-7.66e-07	2.68e-10
T	28	A	Polar	Hydrophobic	5.6	6	0.4	119	89	-30	116.1	88.6	-27.5	58	-2.5	S	S	P	N	L	B	378.323	378.931	379.787	strand	interface	interface	0.116279	2	0	0	1	7.5	0.319668	-1.01234	0.143792	0	3.29416	0	-7.03984	3.47333	-0.0421981	-2.93046	2.27462	-0.168794	0	0	0	-0.0169514
T	28	C	Polar	Special	5.6	5.07	-0.53	119	121	2	116.1	108.5	-7.6	149	-3.2	S	S	P	P	L	C	378.323	378.931	379.787	strand	interface	interface	0.116279	2	0	0	1	12.73	0.0566888	-1.40884	0.0191724	0	0.582957	0	-4.68673	0.355564	-0.0268623	0.379223	2.14185	-0.157077	0	0	0	-0.0169356
T	28	E	Polar	negativeCharge	5.6	3.22	-2.38	119	147	28	116.1	138.4	22.3	65	2.8	S	B	P	-	L	L	378.323	378.931	379.787	strand	interface	interface	0.116279	2	0	0	1	-16.64	-0.336821	-1.92823	0.0518312	0	-1.42602	-2.28949	2.18709	-2.81352	0.00713132	1.94831	1.13633	-0.1215	0	0	-0.591458	-0.0169429
T	28	F	Polar	Hydrophobic	5.6	3.32	-2.28	119	165	46	116.1	189.9	73.8	103	-3.5	S	B	P	N	L	B	378.323	378.931	379.787	strand	interface	interface	0.116279	2	0	0	1	265.06	-0.671175	17.6356	-0.467178	-0.0141203	-5.52644	2.11309	1.45479	-9.20875	22.2465	1.36952	1.18267	4.51875	0.120842	-2.92e-09	-7.66e-07	-0.0332147
T	28	G	Polar	Special	5.6	3.29	-2.31	119	75	-44	116.1	60.1	-56	59	-0.3	S	S	P	N	L	B	378.323	378.931	379.787	strand	interface	interface	0.116279	2	0	0	1	-15	0.75072	3.72481	0.192876	0	6.1567	0	-9.89123	8.21887	-0.0554674	-3.54962	2.84393	-0.174305	0	0	0	-0.01695
T	28	H	Polar	PositiveCharge	5.6	7.59	1.99	119	155	36	116.1	153.2	37.1	47	2.5	S	B	P	+	L	L	378.323	378.931	379.787	strand	interface	interface	0.116279	2	0	0	1	-16.52	0.212792	18.6198	-0.275697	0	-5.217	0.0147114	6.11092	-6.47194	17.6194	2.27037	2.90334	1.14905	0.0546229	0	2.49e-14	0.516632
T	28	K	Polar	PositiveCharge	5.6	9.74	4.14	119	146	27	116.1	168.6	52.5	78	3.2	S	B	P	+	L	L	378.323	378.931	379.787	strand	interface	interface	0.116279	2	0	0	1	-15.3	-0.631236	-2.06025	0.0189502	1.04e-05	-2.48529	1.48492	-0.276263	-5.9462	0.205642	3.09409	0.692087	0.0373033	-0.000314888	2.92e-09	1.13141	-0.0169096
T	28	L	Polar	Hydrophobic	5.6	9.71	4.11	119	131	12	116.1	166.7	50.6	92	-4.5	S	B	P	N	L	B	378.323	378.931	379.787	strand	interface	interface	0.116279	2	0	0	1	136.31	-0.564648	-9.40514	-0.223296	-0.00203437	-3.75246	0.0358853	-0.436517	-8.80191	1.08422	2.32193	0.528522	-0.142465	0.00255904	-2.92e-09	-7.66e-07	-0.0170104
T	28	N	Polar	Polar	5.6	5.47	-0.13	119	132	13	116.1	114.1	-2	65	2.8	S	S	P	P	L	L	378.323	378.931	379.787	strand	interface	interface	0.116279	2	0	0	1	-16.64	0.194115	3.75767	-0.101562	0	-1.40762	0	2.79444	-0.512298	0.675667	0.945925	1.53421	-0.154169	0	0	0	-0.0169325
T	28	P	Polar	Special	5.6	6.3	0.7	119	115	-4	116.1	112.7	-3.4	38	0.9	S	P	P	N	L	P	378.323	378.931	379.787	strand	interface	interface	0.116279	2	0	0	1	-16.64	0.0339967	-0.4558	4.77255	0.00162726	0.148126	0.00226136	-5.89135	-2.59453	4.44993	-1.33288	0.0919664	-0.136959	0.231834	-2.92e-09	-7.66e-07	0.0334492
T	28	Q	Polar	Polar	5.6	6.24	0.64	119	146	27	116.1	143.8	27.7	42	2.8	S	B	P	P	L	L	378.323	378.931	379.787	strand	interface	interface	0.116279	2	0	0	1	-16.64	-0.266676	-2.08156	0.0187697	0	-1.98217	0.000788449	-0.100646	-3.39136	0.0611447	2.67251	0.728053	-0.0717053	0	0	0	-0.0169517
T	28	R	Polar	PositiveCharge	5.6	6.34	0.74	119	174	55	116.1	173.4	57.3	71	3.8	S	B	P	+	L	L	378.323	378.931	379.787	strand	interface	interface	0.116279	2	0	0	1	-15.3	-0.328841	3.92535	0.00488149	0	-4.01199	4.10124	1.7378	-5.61701	0.0507141	3.34195	1.62576	0.274539	0	0	2.43439	-0.0169365
T	28	S	Polar	Polar	5.6	5.68	0.08	119	105	-14	116.1	89	-27.1	58	0.1	S	S	P	P	L	L	378.323	378.931	379.787	strand	interface	interface	0.116279	2	0	0	1	-14.31	0.495279	3.11478	-0.370317	-0.616831	2.55501	0	-3.82687	4.91417	-0.0416579	-0.675124	1.34202	-0.148676	0	0	0	-0.01695
T	28	V	Polar	Hydrophobic	5.6	5.61	0.01	119	117	-2	116.1	140	23.9	69	-4.9	S	S	P	N	L	B	378.323	378.931	379.787	strand	interface	interface	0.116279	2	0	0	1	253.31	-0.206768	-8.68833	-0.212976	0	-1.96689	0.00444487	-1.33158	-5.11392	0.0447944	-0.17034	0.172679	-0.132857	0	0	0	0.0183179
T	28	W	Polar	Hydrophobic	5.6	5.89	0.29	119	204	85	116.1	227.8	111.7	128	0.2	S	B	P	N	L	B	378.323	378.931	379.787	strand	interface	interface	0.116279	2	0	0	1	175.08	-0.57758	18.4936	-0.25432	-1.04e-05	-5.56915	0.0458977	3.98763	-8.31518	22.1402	1.88406	1.95915	2.65571	0.074392	-2.92e-09	-7.66e-07	-0.0404311
T	28	Y	Polar	Hydrophobic	5.6	5.66	0.06	119	181	62	116.1	193.6	77.5	92	0.6	S	B	P	N	L	B	378.323	378.931	379.787	strand	interface	interface	0.116279	2	0	0	1	135.89	-0.68209	21.6651	-0.307001	0.0648454	-5.75636	2.39406	3.52036	-8.7248	25.0217	1.83682	0.935728	2.7074	0.106606	-2.92e-09	-7.66e-07	-0.0276764
N	29	A	Polar	Hydrophobic	5.47	6	0.53	132	89	-43	114.1	88.6	-25.5	111	-5.3	S	S	P	N	L	B	378.765	378.329	378.878	strand	interface	interface	0.153846	1	0	0	0	242.2	0.0179483	2.16528	0.0335219	11.0369	4.63184	2.82e-06	-8.78965	3.06694	-0.116791	-6.70118	-0.838463	-0.15383	0.00066193	-2.92e-09	-7.66e-07	-0.00400525
N	29	D	Polar	negativeCharge	5.47	5.05	-0.42	132	133	1	114.1	111.1	-3	23	0	S	S	P	-	L	L	378.765	378.329	378.878	strand	interface	interface	0.153846	1	0	0	0	-15.56	-0.0099542	5.08627	0.0556741	11.382	3.21447	-2.43599	-3.77654	2.4398	-0.0953267	-4.97002	-0.508241	0.294298	-0.00195194	-0.000303578	-0.507722	-0.00584473
N	29	E	Polar	negativeCharge	5.47	3.22	-2.25	132	147	15	114.1	138.4	24.3	42	0	S	B	P	-	L	L	378.765	378.329	378.878	strand	interface	interface	0.153846	1	0	0	0	-15.56	-1.23586	1.06918	-2.10362	6.98384	0.946085	-2.30459	-0.0462686	-0.11391	-0.0766863	-0.484892	-0.889562	-0.183543	0.0483228	0.001388	-0.654861	-0.00420389
N	29	F	Polar	Hydrophobic	5.47	3.32	-2.15	132	165	33	114.1	189.9	75.8	158	-6.3	S	B	P	N	L	B	378.765	378.329	378.878	strand	interface	interface	0.153846	1	0	0	0	773.89	-0.743252	-3.43484	-0.180575	7.41672	-4.26975	0.0250888	1.49757	-7.78417	4.41406	-3.02203	-1.37525	-0.115935	0.0970921	0.00028571	-0.00541038	-0.0354634
N	29	G	Polar	Special	5.47	3.29	-2.18	132	75	-57	114.1	60.1	-54	80	-3.1	S	S	P	N	L	B	378.765	378.329	378.878	strand	interface	interface	0.153846	1	0	0	0	19.57	0.730848	5.52646	0.126105	11.0555	6.70552	2.82e-06	-11.5794	5.76081	-0.14756	-7.01787	0.800842	-0.174423	0.0456248	-2.92e-09	-7.66e-07	-0.00313235
N	29	H	Polar	PositiveCharge	5.47	7.59	2.12	132	155	23	114.1	153.2	39.1	68	-0.3	S	B	P	+	L	L	378.765	378.329	378.878	strand	interface	interface	0.153846	1	0	0	0	-6.98	-0.441556	2.62416	-0.123907	8.13508	-1.77575	-0.0470003	2.34487	-2.33019	0.0991042	-2.58418	-1.33471	-0.182765	0.349696	0.000835005	-0.00145098	0.424214
N	29	L	Polar	Hydrophobic	5.47	9.71	4.24	132	131	-1	114.1	166.7	52.6	153	-7.3	S	B	P	N	L	B	378.765	378.329	378.878	strand	interface	interface	0.153846	1	0	0	0	653.12	-1.18082	-2.13084	-0.2122	10.9445	-1.34632	2.82e-06	-2.5975	-5.49816	-0.0665326	-3.1613	-0.457625	0.287071	0.0229264	-2.92e-09	-7.66e-07	-0.02281
N	29	M	Polar	Hydrophobic	5.47	5.74	0.27	132	149	17	114.1	162.9	48.8	142	-5.4	S	B	P	N	L	B	378.765	378.329	378.878	strand	interface	interface	0.153846	1	0	0	0	316.01	-1.41575	-2.26486	-0.365914	11.9365	-3.34567	-0.0966601	-1.22437	-7.61062	0.282088	-1.86968	0.174723	-0.144315	0.15968	-2.92e-09	-7.66e-07	-0.000936104
N	29	P	Polar	Special	5.47	6.3	0.83	132	115	-17	114.1	112.7	-1.4	91	-1.9	S	P	P	N	L	P	378.765	378.329	378.878	strand	interface	interface	0.153846	1	0	0	0	-16.64	2.1247	13.3092	5.60853	11.0468	0.645677	2.82e-06	-7.07413	-4.24292	6.50119	-4.97793	6.14954	-0.347017	0.00012543	-2.92e-09	-7.66e-07	-0.000574898
N	29	Q	Polar	Polar	5.47	6.24	0.77	132	146	14	114.1	143.8	29.7	46	0	S	B	P	P	L	L	378.765	378.329	378.878	strand	interface	interface	0.153846	1	0	0	0	0.4	-0.545581	0.918574	0.0676622	5.05523	-0.139289	-0.098817	-0.686986	-0.914828	-0.112275	-0.463159	-1.7459	-0.0439081	0.00131248	-2.92e-09	-7.66e-07	0.000841195
N	29	R	Polar	PositiveCharge	5.47	6.34	0.87	132	174	42	114.1	173.4	59.3	86	1	S	B	P	+	L	L	378.765	378.329	378.878	strand	interface	interface	0.153846	1	0	0	0	-14.22	-2.04607	4.02586	-0.777827	2.15654	-2.65549	1.66358	3.49394	-2.63973	-0.0198129	3.42858	-1.79036	0.662813	0.113216	0.045373	0.461722	-0.0034602
N	29	S	Polar	Polar	5.47	5.68	0.21	132	105	-27	114.1	89	-25.1	46	-2.7	S	S	P	P	L	L	378.765	378.329	378.878	strand	interface	interface	0.153846	1	0	0	0	33.05	0.23261	1.60709	-1.20082	9.83423	4.60392	2.82e-06	-8.06863	4.52733	-0.0854816	-4.88172	-2.96792	-0.149645	8.53e-05	-2.92e-09	-7.66e-07	-0.00417172
N	29	T	Polar	Polar	5.47	5.6	0.13	132	119	-13	114.1	116.1	2	65	-2.8	S	S	P	P	L	L	378.765	378.329	378.878	strand	interface	interface	0.153846	1	0	0	0	184.55	-0.215226	2.11018	-0.530613	10.4896	2.38084	2.82e-06	-4.92556	1.0136	0.243917	-4.52372	-2.43463	0.399343	0.0450827	-2.92e-09	-7.66e-07	-0.00258749
N	29	V	Polar	Hydrophobic	5.47	5.61	0.14	132	117	-15	114.1	140	25.9	133	-7.7	S	S	P	N	L	B	378.765	378.329	378.878	strand	interface	interface	0.153846	1	0	0	0	766.45	-0.554932	-0.176311	0.0360744	11.0943	0.830254	2.82e-06	-4.44665	-2.12137	0.0526123	-4.33714	-1.84896	0.573202	0.0225896	-2.92e-09	-7.66e-07	-0.00859802
N	29	Y	Polar	Hydrophobic	5.47	5.66	0.19	132	181	49	114.1	193.6	79.5	143	-2.2	S	B	P	N	L	B	378.765	378.329	378.878	strand	interface	interface	0.153846	1	0	0	0	615.98	-0.384864	5.49766	-0.601381	9.25758	-4.71054	-0.489804	5.43883	-6.72033	6.58842	-2.39246	-0.837947	-0.040395	0.311149	0.0134794	0.00838704	-0.0161849
I	30	C	Hydrophobic	Special	6.02	5.07	-0.95	131	121	-10	166.7	108.5	-58.2	198	2	B	S	N	P	B	C	380.201	381.038	382.003	loop	interface	interface	0.22335	1	0	0	1	-14.28	1.30632	6.1275	-0.0515389	-0.93483	3.22242	0.0982	-3.76696	6.64521	-0.251668	-0.464407	2.04638	-0.419667	0.0837936	-2.92e-09	-7.66e-07	0.00437437
I	30	D	Hydrophobic	negativeCharge	6.02	5.05	-0.97	131	133	2	166.7	111.1	-55.6	168	8	B	S	N	-	B	L	380.201	381.038	382.003	loop	interface	interface	0.22335	1	0	0	1	-15.57	1.49109	3.24404	-0.147822	-6.70076	2.11428	-3.5089	5.76309	6.55267	-0.277519	-0.425127	0.414477	-0.297715	0.115894	-2.92e-09	-0.253848	0.0112115
I	30	F	Hydrophobic	Hydrophobic	6.02	3.32	-2.7	131	165	34	166.7	189.9	23.2	21	1.7	B	B	N	N	B	B	380.201	381.038	382.003	loop	interface	interface	0.22335	1	0	0	1	1.78	0.653783	8.45851	0.0498759	-0.00411306	-0.48367	0.119221	-1.23749	-0.103535	8.38178	0.667358	1.20955	-0.14044	-0.0707842	-2.92e-09	-7.66e-07	-2.4e-05
I	30	H	Hydrophobic	PositiveCharge	6.02	7.59	1.57	131	155	24	166.7	153.2	-13.5	94	7.7	B	B	N	+	B	L	380.201	381.038	382.003	loop	interface	interface	0.22335	1	0	0	1	-14.16	1.33365	20.4285	-0.0256356	0	0.257492	0.00642	3.66001	3.22429	10.7017	0.0967464	1.28828	0.887356	-0.168313	0	1.07e-14	0.331837
I	30	L	Hydrophobic	Hydrophobic	6.02	9.71	3.69	131	131	0	166.7	166.7	0	5	0.7	B	B	N	N	B	B	380.201	381.038	382.003	loop	interface	interface	0.22335	1	0	0	1	-7.75	0.451551	0.274865	-0.250683	0.0570735	-0.0820617	0.0413439	-0.0316311	-0.201169	0.0476952	0.0408787	0.885947	-0.230224	0.165384	-2.92e-09	-7.66e-07	-0.00230403
I	30	P	Hydrophobic	Special	6.02	6.3	0.28	131	115	-16	166.7	112.7	-54	95	6.1	B	P	N	N	B	P	380.201	381.038	382.003	loop	interface	interface	0.22335	1	0	0	1	-14.18	1.14231	6.13771	0.0127183	0.0926093	4.20631	0.135105	-6.97923	6.7135	-0.377181	-2.92799	5.61855	-0.33979	0.143647	-2.92e-09	-7.66e-07	-0.0168876
I	30	R	Hydrophobic	PositiveCharge	6.02	6.34	0.32	131	174	43	166.7	173.4	6.7	97	9	B	B	N	+	B	L	380.201	381.038	382.003	loop	interface	interface	0.22335	1	0	0	1	-14.22	0.77288	9.46541	-0.130782	-6.57773	-0.0345208	4.55753	1.81744	3.2983	0.194204	2.96016	0.845499	0.264266	0.0794587	-2.92e-09	2.27522	-0.00418602
I	30	S	Hydrophobic	Polar	6.02	5.68	-0.34	131	105	-26	166.7	89	-77.7	142	5.3	B	S	N	P	B	L	380.201	381.038	382.003	loop	interface	interface	0.22335	1	0	0	1	-14.11	1.77263	9.15348	-0.0481892	-5.28529	5.4914	0.0280156	-4.61429	10.8253	-0.229173	-1.08461	1.72011	2.35034	0.16374	-2.92e-09	-7.66e-07	-9.43e-05
I	30	T	Hydrophobic	Polar	6.02	5.6	-0.42	131	119	-12	166.7	116.1	-50.6	89	5.2	B	S	N	P	B	L	380.201	381.038	382.003	loop	interface	interface	0.22335	1	0	0	1	-14.09	0.918172	5.17671	-0.0285235	0.0144216	3.05433	0.0640025	-0.853447	6.28733	-0.275541	-1.5634	-1.1064	-0.416169	0.044109	-2.92e-09	-7.66e-07	0.000108933
I	30	V	Hydrophobic	Hydrophobic	6.02	5.61	-0.41	131	117	-14	166.7	140	-26.7	29	0.3	B	S	N	N	B	B	380.201	381.038	382.003	loop	interface	interface	0.22335	1	0	0	1	0.75	0.482064	3.06025	0.0300849	0.0473563	1.83465	0.0872485	-0.491063	3.6022	-0.299822	-1.2362	-1.04828	0.533991	-0.0207271	-2.92e-09	-7.66e-07	8.2e-05
I	30	W	Hydrophobic	Hydrophobic	6.02	5.89	-0.13	131	204	73	166.7	227.8	61.1	61	5.4	B	B	N	N	B	B	380.201	381.038	382.003	loop	interface	interface	0.22335	1	0	0	1	-5.29	1.17709	7.42352	-0.116157	-0.437356	-3.17142	0.0329613	2.53957	-2.98365	8.21407	1.3834	2.34362	-0.381425	0.0717416	-2.92e-09	-7.66e-07	-9.64e-05
I	30	Y	Hydrophobic	Hydrophobic	6.02	5.66	-0.36	131	181	50	166.7	193.6	26.9	33	5.8	B	B	N	N	B	B	380.201	381.038	382.003	loop	interface	interface	0.22335	1	0	0	1	-8.36	0.742759	9.35664	0.677929	-0.81544	-1.10607	0.0855376	1.33163	0.124543	6.98055	0.923133	1.33146	-0.193524	-0.0311392	-2.92e-09	-7.66e-07	0.0168921
N	31	A	Polar	Hydrophobic	5.47	6	0.53	132	89	-43	114.1	88.6	-25.5	111	-5.3	S	S	P	N	L	B	380.302	379.409	381.454	loop	interface	interface	0.0358974	3	0	0	1	222.23	-0.0558237	4.47516	2.59405	10.2587	5.77341	-0.0182764	-10.6551	3.47634	-0.222121	-5.38044	-1.51198	0.180146	-0.209886	-2.92e-09	-7.66e-07	-0.0195433
N	31	C	Polar	Special	5.47	5.07	-0.4	132	121	-11	114.1	108.5	-5.6	139	-6	S	S	P	P	L	C	380.302	379.409	381.454	loop	interface	interface	0.0358974	3	0	0	1	159.94	0.363318	7.69083	3.24498	9.24468	2.45418	2.82e-06	-7.09918	0.74523	-0.179538	-0.687725	0.0377309	-0.0512212	-0.182194	-2.92e-09	-7.66e-07	-0.0183087
N	31	D	Polar	negativeCharge	5.47	5.05	-0.42	132	133	1	114.1	111.1	-3	23	0	S	S	P	-	L	L	380.302	379.409	381.454	loop	interface	interface	0.0358974	3	0	0	1	-14.1	-0.482773	7.09903	3.21882	0.539456	1.15005	-0.836026	5.01558	0.770639	-0.092556	-1.03185	-1.36423	0.181986	-0.121012	0	-0.437025	-0.0158258
N	31	F	Polar	Hydrophobic	5.47	3.32	-2.15	132	165	33	114.1	189.9	75.8	158	-6.3	S	B	P	N	L	B	380.302	379.409	381.454	loop	interface	interface	0.0358974	3	0	0	1	790.41	0.318182	1.06289	3.22672	2.78292	-5.98243	0	0.733079	-11.6334	11.9474	1.41963	-1.45743	0.0288999	0.218699	0	0	-0.00253792
N	31	G	Polar	Special	5.47	3.29	-2.18	132	75	-57	114.1	60.1	-54	80	-3.1	S	S	P	N	L	B	380.302	379.409	381.454	loop	interface	interface	0.0358974	3	0	0	1	17.8	0.0479096	11.93	3.3685	10.2994	8.40088	2.82e-06	-13.3297	7.54862	-0.150065	-4.78578	0.675742	-0.0438667	-0.862935	-2.92e-09	-7.66e-07	-0.0536344
N	31	H	Polar	PositiveCharge	5.47	7.59	2.12	132	155	23	114.1	153.2	39.1	68	-0.3	S	B	P	+	L	L	380.302	379.409	381.454	loop	interface	interface	0.0358974	3	0	0	1	-5.37	0.624586	9.35579	2.39101	7.92124	-3.20657	-0.000234521	3.43278	-4.70181	2.56439	1.24785	-0.929434	-0.00107791	0.0156935	-2.92e-09	-7.66e-07	0.637635
N	31	I	Polar	Hydrophobic	5.47	6.02	0.55	132	131	-1	114.1	166.7	52.6	149	-8	S	B	P	N	L	B	380.302	379.409	381.454	loop	interface	interface	0.0358974	3	0	0	1	773.28	-0.240213	3.87974	0.749662	17.9645	-2.65717	-0.0100337	-1.7172	-10.5004	0.89837	0.731016	-1.91366	0.339822	-0.479084	-2.92e-09	-7.66e-07	-0.00509116
N	31	L	Polar	Hydrophobic	5.47	9.71	4.24	132	131	-1	114.1	166.7	52.6	153	-7.3	S	B	P	N	L	B	380.302	379.409	381.454	loop	interface	interface	0.0358974	3	0	0	1	649.63	-0.647047	1.29704	2.83437	10.6635	-3.39565	0.0166641	-0.0945703	-9.36293	1.00416	0.260393	-1.83515	1.19594	0.484941	-2.92e-09	-7.66e-07	0.0103597
N	31	M	Polar	Hydrophobic	5.47	5.74	0.27	132	149	17	114.1	162.9	48.8	142	-5.4	S	B	P	N	L	B	380.302	379.409	381.454	loop	interface	interface	0.0358974	3	0	0	1	294.57	-0.0810331	2.10933	2.63981	12.1721	-3.82339	-0.0132479	-0.388459	-8.38916	0.267299	0.230523	-0.643812	0.0882393	0.277405	-2.92e-09	-7.66e-07	-0.0306178
N	31	P	Polar	Special	5.47	6.3	0.83	132	115	-17	114.1	112.7	-1.4	91	-1.9	S	P	P	N	L	P	380.302	379.409	381.454	loop	interface	interface	0.0358974	3	0	0	1	-14.09	-0.984074	-3.82048	3.07888	9.37504	1.9236	0.0270012	-8.73655	-2.42599	-0.14677	-2.51245	-4.33495	-0.0964543	-0.0772652	-2.92e-09	-7.66e-07	0.0281573
N	31	Q	Polar	Polar	5.47	6.24	0.77	132	146	14	114.1	143.8	29.7	46	0	S	B	P	P	L	L	380.302	379.409	381.454	loop	interface	interface	0.0358974	3	0	0	1	0.34	0.2329	7.50232	0.427829	6.70838	-0.462974	-0.0211995	-0.0708029	-1.85643	-0.103795	2.6757	-0.799244	0.987655	0.105367	-2.92e-09	-7.66e-07	0.0172141
N	31	R	Polar	PositiveCharge	5.47	6.34	0.87	132	174	42	114.1	173.4	59.3	86	1	S	B	P	+	L	L	380.302	379.409	381.454	loop	interface	interface	0.0358974	3	0	0	1	-12.74	0.0142019	11.0012	2.58411	8.65328	-1.98292	0.816754	2.14765	-2.94247	0.00661652	1.67187	-1.52554	1.0916	0.0177321	-2.92e-09	0.478088	0.00218208
N	31	S	Polar	Polar	5.47	5.68	0.21	132	105	-27	114.1	89	-25.1	46	-2.7	S	S	P	P	L	L	380.302	379.409	381.454	loop	interface	interface	0.0358974	3	0	0	1	30.14	0.815433	11.4572	2.15949	10.2862	5.15627	2.82e-06	-7.17637	5.72773	0.081364	-4.32634	-1.39415	0.951193	-0.121444	-2.92e-09	-7.66e-07	-0.0082111
N	31	T	Polar	Polar	5.47	5.6	0.13	132	119	-13	114.1	116.1	2	65	-2.8	S	S	P	P	L	L	380.302	379.409	381.454	loop	interface	interface	0.0358974	3	0	0	1	167.24	0.292987	13.2152	-0.807217	10.8035	2.57351	-0.0651399	-3.23059	1.66898	3.39203	-1.40788	-1.07673	1.3444	-0.623637	-2.92e-09	-7.66e-07	0.0203513
N	31	V	Polar	Hydrophobic	5.47	5.61	0.14	132	117	-15	114.1	140	25.9	133	-7.7	S	S	P	N	L	B	380.302	379.409	381.454	loop	interface	interface	0.0358974	3	0	0	1	781.05	0.00705628	6.17831	1.70459	15.4222	0.1783	-0.0251095	-4.10005	-5.35597	1.661	-1.89868	-1.53423	0.169909	0.125517	-2.92e-09	-7.66e-07	-0.0436541
Y	32	A	Hydrophobic	Hydrophobic	5.66	6	0.34	181	89	-92	193.6	88.6	-105	112	-3.1	B	S	N	N	B	B	383.699	384.545	385.038	loop	interface	interface	0.212928	4	0	0	0	-10.64	0.730402	11.4409	0.292724	-0.105722	11.4449	-0.336665	-9.50736	16.6588	-0.362254	-6.56729	0.152695	-0.22889	-0.826908	-2.92e-09	-7.66e-07	2.88e-10
Y	32	I	Hydrophobic	Hydrophobic	5.66	6.02	0.36	181	131	-50	193.6	166.7	-26.9	33	-5.8	B	B	N	N	B	B	383.699	384.545	385.038	loop	interface	interface	0.212928	4	0	0	0	18.58	0.21358	8.21397	0.139842	-0.193759	3.802	-0.283512	-3.09367	3.969	1.37656	-1.64805	0.325546	3.82001	0.343509	-2.92e-09	-7.66e-07	2.88e-10
Y	32	L	Hydrophobic	Hydrophobic	5.66	9.71	4.05	181	131	-50	193.6	166.7	-26.9	36	-5.1	B	B	N	N	B	B	383.699	384.545	385.038	loop	interface	interface	0.212928	4	0	0	0	1.54	0.0719178	-0.511571	0.220697	0.0398179	2.5561	-0.371097	-2.37959	1.54459	-0.167934	-0.924005	-1.11871	0.08855	0.316034	-2.92e-09	-7.66e-07	2.88e-10
Y	32	P	Hydrophobic	Special	5.66	6.3	0.64	181	115	-66	193.6	112.7	-80.9	110	0.3	B	P	N	N	B	P	383.699	384.545	385.038	loop	interface	interface	0.212928	4	0	0	0	-12.44	-0.820263	6.85794	3.43235	4.43051	9.49807	-0.300096	-10.3374	12.1185	0.0736643	-7.58219	-4.19641	-0.279064	-4.97277	-2.92e-09	-7.66e-07	2.88e-10
Y	32	Q	Hydrophobic	Polar	5.66	6.24	0.58	181	146	-35	193.6	143.8	-49.8	99	2.2	B	B	N	P	B	L	383.699	384.545	385.038	loop	interface	interface	0.212928	4	0	0	0	-12.44	0.208438	8.52735	-2.5364	-3.0626	4.97275	-0.361415	-1.13209	9.06071	-0.353582	1.51364	0.493999	-0.067668	-0.0785321	-2.92e-09	-7.66e-07	2.88e-10
Y	32	R	Hydrophobic	PositiveCharge	5.66	6.34	0.68	181	174	-7	193.6	173.4	-20.2	77	3.2	B	B	N	+	B	L	383.699	384.545	385.038	loop	interface	interface	0.212928	4	0	0	0	-12.77	-0.218285	10.2331	-3.87052	-4.8707	1.53765	2.01051	4.00223	6.26245	0.718902	4.10793	-0.774063	0.0075848	-0.0754836	-2.92e-09	1.09685	0.00428296
Y	32	S	Hydrophobic	Polar	5.66	5.68	0.02	181	105	-76	193.6	89	-104.6	144	-0.5	B	S	N	P	B	L	383.699	384.545	385.038	loop	interface	interface	0.212928	4	0	0	0	-12.45	0.297735	14.5414	0.753383	-0.139269	11.0343	-0.36902	-6.83755	18.1313	-0.513586	-5.38418	-1.84579	-0.288203	-0.433797	-2.92e-09	-7.66e-07	2.88e-10
Y	32	T	Hydrophobic	Polar	5.66	5.6	-0.06	181	119	-62	193.6	116.1	-77.5	92	-0.6	B	S	N	P	B	L	383.699	384.545	385.038	loop	interface	interface	0.212928	4	0	0	0	-11.15	0.252076	11.1179	1.18055	-5.03431	8.41694	-0.163662	-4.35153	13.1342	-0.467426	-3.49434	1.7812	0.116232	-0.450042	-2.92e-09	-7.66e-07	2.25e-05
Y	32	V	Hydrophobic	Hydrophobic	5.66	5.61	-0.05	181	117	-64	193.6	140	-53.6	55	-5.5	B	S	N	N	B	B	383.699	384.545	385.038	loop	interface	interface	0.212928	4	0	0	0	20.71	0.673173	10.7562	0.199335	-0.0749881	6.61457	-0.362239	-5.7579	8.59041	1.32028	-4.24785	0.218126	4.25665	-0.109184	-2.92e-09	-7.66e-07	-0.00022155
Y	32	W	Hydrophobic	Hydrophobic	5.66	5.89	0.23	181	204	23	193.6	227.8	34.2	37	-0.4	B	B	N	N	B	B	383.699	384.545	385.038	loop	interface	interface	0.212928	4	0	0	0	0.72	0.0919886	-3.33269	-0.171379	0.0130677	-2.8547	-0.290872	2.78361	-4.34378	-0.327311	0.489379	1.52422	-0.155008	0.18603	-2.92e-09	-7.66e-07	7.62e-05
Y	33	C	Hydrophobic	Special	5.66	5.07	-0.59	181	121	-60	193.6	108.5	-85.1	194	-3.8	B	S	N	P	B	C	383.216	384.613	387.968	loop	interface	interface	0.0532319	4	0	0	0	-10.63	2.27159	18.5632	0.737057	0.487963	9.9023	-0.159063	-8.06281	14.4923	0.193353	-1.76961	2.94067	-0.19895	-0.491059	0	0	0
Y	33	G	Hydrophobic	Special	5.66	3.29	-2.37	181	75	-106	193.6	60.1	-133.5	147	-0.9	B	S	N	N	B	B	383.216	384.613	387.968	loop	interface	interface	0.0532319	4	0	0	0	-12.47	2.42481	21.3455	0.65401	0.792561	14.9479	-0.0465036	-12.8392	20.3678	-0.822565	-4.72448	3.31669	-0.300634	-1.79545	-2.91e-09	-7.66e-07	2.88e-10
Y	33	I	Hydrophobic	Hydrophobic	5.66	6.02	0.36	181	131	-50	193.6	166.7	-26.9	33	-5.8	B	B	N	N	B	B	383.216	384.613	387.968	loop	interface	interface	0.0532319	4	0	0	0	18.63	0.92485	12.3173	0.963977	0.974256	5.62864	-0.160886	-3.82975	5.57662	-0.0899348	-0.822596	2.83261	1.24432	0.732006	0	0	0
Y	33	R	Hydrophobic	PositiveCharge	5.66	6.34	0.68	181	174	-7	193.6	173.4	-20.2	77	3.2	B	B	N	+	B	L	383.216	384.613	387.968	loop	interface	interface	0.0532319	4	0	0	0	-11.12	1.05217	8.51899	-8.57861	-8.62229	2.31845	0.585598	5.04385	7.62958	-0.177473	4.46326	5.41433	0.521492	0.263933	-0.0822447	0.00304091	3.55e-15
Y	33	T	Hydrophobic	Polar	5.66	5.6	-0.06	181	119	-62	193.6	116.1	-77.5	92	-0.6	B	S	N	P	B	L	383.216	384.613	387.968	loop	interface	interface	0.0532319	4	0	0	0	-11.14	2.82109	21.1904	1.15293	0.988098	9.70659	-0.160966	-3.81823	14.3121	-0.153827	-2.58411	1.63224	0.115551	-0.303918	0	0	0
Y	33	V	Hydrophobic	Hydrophobic	5.66	5.61	-0.05	181	117	-64	193.6	140	-53.6	55	-5.5	B	S	N	N	B	B	383.216	384.613	387.968	loop	interface	interface	0.0532319	4	0	0	0	20.76	1.56738	15.6176	1.01635	0.994237	8.11277	-0.160735	-4.83549	10.3371	-0.125591	-2.49946	1.73501	1.04344	0.328827	0	0	0
K	34	H	PositiveCharge	PositiveCharge	9.74	7.59	-2.15	146	155	9	168.6	153.2	-15.4	32	-0.7	B	B	+	+	L	L	381.467	382.713	385.951	loop	interface	interface	0.101695	6	0	0	1	-11.69	0.241726	9.43251	4.91174	14.2693	1.42443	-3.82304	-2.3401	1.53051	1.18746	-9.47137	0.10453	-0.233293	0.229946	-0.124374	0.145748	1.85093
K	34	L	PositiveCharge	Hydrophobic	9.74	9.71	-0.03	146	131	-15	168.6	166.7	-1.9	107	-7.7	B	B	+	N	L	B	381.467	382.713	385.951	loop	interface	interface	0.101695	6	0	0	1	6.36	0.0620013	-1.93476	2.56266	9.85558	-0.0869392	5.30518	-11.0996	-3.42849	1.10466	-5.75162	-0.221281	-0.314451	0.424443	-0.145038	0.284619	2.87e-10
K	34	P	PositiveCharge	Special	9.74	6.3	-3.44	146	115	-31	168.6	112.7	-55.9	103	-2.3	B	P	+	N	L	P	381.467	382.713	385.951	loop	interface	interface	0.101695	6	0	0	1	-13.81	-0.443147	-1.97396	5.15566	13.1597	7.58273	5.70755	-21.9833	6.18281	1.29616	-13.1468	-5.34656	-0.815885	-5.68674	-0.0428404	0.276776	2.87e-10
K	34	R	PositiveCharge	PositiveCharge	9.74	6.34	-3.4	146	174	28	168.6	173.4	4.8	26	0.6	B	B	+	+	L	L	381.467	382.713	385.951	loop	interface	interface	0.101695	6	0	0	1	0.02	0.0163613	-2.15281	0.901653	-0.0970404	-4.03579	-1.82554	1.42643	-1.14144	1.85995	-0.205405	0.734733	0.435976	0.799666	-0.00530392	-0.201035	2.88e-10
K	34	T	PositiveCharge	Polar	9.74	5.6	-4.14	146	119	-27	168.6	116.1	-52.5	78	-3.2	B	S	+	P	L	L	381.467	382.713	385.951	loop	interface	interface	0.101695	6	0	0	1	-10.5	0.51259	8.7392	2.31449	9.79913	4.36941	5.53355	-13.6009	4.91735	0.98149	-8.1631	1.59585	0.83888	-0.819217	-0.10816	0.261193	2.87e-10
K	34	Y	PositiveCharge	Hydrophobic	9.74	5.66	-4.08	146	181	35	168.6	193.6	25	85	-2.6	B	B	+	N	L	B	381.467	382.713	385.951	loop	interface	interface	0.101695	6	0	0	1	1.77	-0.085988	3.2241	3.16068	10.0896	-3.72245	2.5383	-4.12313	-5.53896	0.58519	-6.15607	1.82855	4.33006	0.467103	-0.0678536	0.300193	2.87e-10
D	35	A	negativeCharge	Hydrophobic	5.05	6	0.95	133	89	-44	111.1	88.6	-22.5	126	-5.3	S	S	-	N	L	B	379.772	380.45	382.314	loop	interface	interface	0.0621762	3	0	0	0	-10.5	0.0438288	9.27245	5.23589	9.58299	4.61357	1.01481	-12.7031	3.90386	0.635053	-3.26585	0.333212	-0.195536	-1.05449	5.84e-05	0.117478	2.87e-10
D	35	P	negativeCharge	Special	5.05	6.3	1.25	133	115	-18	111.1	112.7	1.6	108	-1.9	S	P	-	N	L	P	379.772	380.45	382.314	loop	interface	interface	0.0621762	3	0	0	0	-10.47	1.27686	12.9528	4.07456	12.2211	1.81868	0.974597	-14.0114	-1.43599	6.55291	-1.85446	4.47482	0.0609351	-5.31807	-0.0329338	0.109991	2.88e-10
D	35	S	negativeCharge	Polar	5.05	5.68	0.63	133	105	-28	111.1	89	-22.1	65	-2.7	S	S	-	P	L	L	379.772	380.45	382.314	loop	interface	interface	0.0621762	3	0	0	0	-10.47	0.400938	10.9597	5.5897	5.8241	4.00299	1.17196	-9.97614	5.58274	0.380614	-0.645285	-1.37122	0.30587	-0.779031	-0.0343351	0.128722	2.88e-10
D	35	T	negativeCharge	Polar	5.05	5.6	0.55	133	119	-14	111.1	116.1	5	85	-2.8	S	S	-	P	L	L	379.772	380.45	382.314	loop	interface	interface	0.0621762	3	0	0	0	-10.47	0.453114	7.27856	5.55208	9.21141	0.974319	1.06765	-5.97419	-0.0093277	0.343726	-0.162434	-3.84078	0.0420482	0.102128	-0.0342427	0.108297	3.55e-15
D	35	Y	negativeCharge	Hydrophobic	5.05	5.66	0.61	133	181	48	111.1	193.6	82.5	160	-2.2	S	B	-	N	L	B	379.772	380.45	382.314	loop	interface	interface	0.0621762	3	0	0	0	-10.45	1.6659	5.70077	4.74083	9.29502	-9.33082	1.12649	2.57389	-14.4971	11.1956	1.08429	-1.40148	0.843768	3.36472	-0.0421854	0.112519	2.88e-10
A	36	D	Hydrophobic	negativeCharge	6	5.05	-0.95	89	133	44	88.6	111.1	22.5	126	5.3	S	S	N	-	B	L	376.971	376.983	377.74	helix	interface	interface	0.116279	2	0	0	1	-0.04	0.337912	9.55463	-0.153025	-7.32863	-2.65641	0.270038	9.40836	-1.83251	2.95716	3.31817	2.38561	2.90533	1.10585	0.000737766	0.184588	0.0952127
A	36	E	Hydrophobic	negativeCharge	6	3.22	-2.78	89	147	58	88.6	138.4	49.8	107	5.3	S	B	N	-	B	L	376.971	376.983	377.74	helix	interface	interface	0.116279	2	0	0	1	-0.01	-0.0233137	0.842152	-0.508772	-7.97497	-4.17237	-2.92442	9.52675	-4.52122	1.49551	7.93891	2.04291	-0.357636	1.1635	-0.0919404	-0.0553947	0.444798
A	36	G	Hydrophobic	Special	6	3.29	-2.71	89	75	-14	88.6	60.1	-28.5	60	2.2	S	S	N	N	B	B	376.971	376.983	377.74	helix	interface	interface	0.116279	2	0	0	1	-0.12	0.359835	5.84232	-0.0750714	0.143168	2.35127	0.00857027	-2.30275	3.67857	-6.57e-05	-0.188509	2.22201	-1.1e-06	-1.21041	0	-3.55e-15	0.00512487
A	36	I	Hydrophobic	Hydrophobic	6	6.02	0.02	89	131	42	88.6	166.7	78.1	94	-2.7	S	B	N	N	B	B	376.971	376.983	377.74	helix	interface	interface	0.116279	2	0	0	1	-0.01	0.462618	-0.931659	-0.781139	0.824757	-7.06793	-0.393708	6.93368	-11.217	2.81115	4.92651	2.9452	-0.0583018	1.68721	0.0137323	-0.0133917	0.144735
A	36	P	Hydrophobic	Special	6	6.3	0.3	89	115	26	88.6	112.7	24.1	27	3.4	S	P	N	N	B	P	376.971	376.983	377.74	helix	interface	interface	0.116279	2	0	0	1	0	-0.965847	1.22054	0.894215	0.733691	-2.82337	-0.022823	0.763213	-5.42346	10.9202	1.30434	-5.10139	-0.017793	-3.38018	0.0139426	-0.0201852	2.87e-10
A	36	R	Hydrophobic	PositiveCharge	6	6.34	0.34	89	174	85	88.6	173.4	84.8	112	6.3	S	B	N	+	B	L	376.971	376.983	377.74	helix	interface	interface	0.116279	2	0	0	1	1.37	-0.171143	2.22126	-0.120522	-6.46286	-5.91807	-1.75595	9.44295	-6.03491	0.369019	8.3899	3.24667	0.512831	1.19675	0.11294	0.035387	0.403883
A	36	S	Hydrophobic	Polar	6	5.68	-0.32	89	105	16	88.6	89	0.4	99	2.6	S	S	N	P	B	L	376.971	376.983	377.74	helix	interface	interface	0.116279	2	0	0	1	0	0.432063	2.15463	-2.81023	-2.96331	-0.55078	-0.0588813	2.57218	1.50638	0.000670173	2.64899	1.65513	0.154483	0.180651	0	0	0
A	36	T	Hydrophobic	Polar	6	5.6	-0.4	89	119	30	88.6	116.1	27.5	58	2.5	S	S	N	P	B	L	376.971	376.983	377.74	helix	interface	interface	0.116279	2	0	0	1	0.02	0.472943	-2.18973	-3.06448	-3.16077	-3.38803	-0.0528167	5.319	-3.80344	0.0045162	2.97196	2.87561	0.108718	0.74672	0	0	0
A	36	Y	Hydrophobic	Hydrophobic	6	5.66	-0.34	89	181	92	88.6	193.6	105	112	3.1	S	B	N	N	B	B	376.971	376.983	377.74	helix	interface	interface	0.116279	2	0	0	1	0	-0.589959	-4.50851	-0.951662	-1.73905	-9.88287	-3.59592	13.5093	-12.4992	1.27146	4.53683	3.32924	1.00409	2.50136	0.0290068	-0.0149556	0.495258
A	37	C	Hydrophobic	Special	6	5.07	-0.93	89	121	32	88.6	108.5	19.9	195	-0.7	S	S	N	P	B	C	378.554	379.024	379.754	helix	interface	interface	0.0775194	3	0	0	0	0	0.716599	3.68321	-0.334132	0.204153	-2.39096	-0.158062	2.32772	-2.39647	0.154868	3.3085	2.812	0.222091	0.673195	0	0	-0.0664981
A	37	D	Hydrophobic	negativeCharge	6	5.05	-0.95	89	133	44	88.6	111.1	22.5	126	5.3	S	S	N	-	B	L	378.554	379.024	379.754	helix	interface	interface	0.0775194	3	0	0	0	-0.54	3.59222	17.8472	-0.454639	-0.0380039	-3.90638	5.44814	14.6741	-2.71695	-0.0947465	2.56475	1.18142	0.614068	1.30205	0.076913	0.380342	0.118226
A	37	E	Hydrophobic	negativeCharge	6	3.22	-2.78	89	147	58	88.6	138.4	49.8	107	5.3	S	B	N	-	B	L	378.554	379.024	379.754	helix	interface	interface	0.0775194	3	0	0	0	-0.01	2.69421	13.3006	-4.51415	-3.66292	-6.88618	6.82995	18.4619	-6.91509	1.2406	7.08317	0.675197	0.51095	2.50421	0.151585	0.372392	-0.0467166
A	37	L	Hydrophobic	Hydrophobic	6	9.71	3.71	89	131	42	88.6	166.7	78.1	96	-2	S	B	N	N	B	B	378.554	379.024	379.754	helix	interface	interface	0.0775194	3	0	0	0	0	-0.218702	0.420187	-0.559661	0.637464	-7.44674	-1.3939	8.39075	-12.5558	1.31617	4.81845	0.724644	6.39937	2.86525	0.0612084	-0.00534761	0.0336252
A	37	P	Hydrophobic	Special	6	6.3	0.3	89	115	26	88.6	112.7	24.1	27	3.4	S	P	N	N	B	P	378.554	379.024	379.754	helix	interface	interface	0.0775194	3	0	0	0	0.02	-1.15156	-5.19448	-0.302537	0.239522	-2.23411	-0.163398	0.335298	-4.14979	5.35905	1.2814	-5.46677	0.00501564	-7.9272	0	0	-0.0981602
A	37	R	Hydrophobic	PositiveCharge	6	6.34	0.34	89	174	85	88.6	173.4	84.8	112	6.3	S	B	N	+	B	L	378.554	379.024	379.754	helix	interface	interface	0.0775194	3	0	0	0	1.35	1.78724	1.74	-3.40439	-3.91451	-12.3282	-7.46225	22.7576	-10.5453	1.48667	9.2381	2.73758	3.51054	2.89397	-0.00158903	-0.377739	0.0434053
A	37	S	Hydrophobic	Polar	6	5.68	-0.32	89	105	16	88.6	89	0.4	99	2.6	S	S	N	P	B	L	378.554	379.024	379.754	helix	interface	interface	0.0775194	3	0	0	0	-0.24	1.55231	7.93824	-0.022379	0.204153	-0.736085	-0.0140675	3.86216	1.82771	0.00662217	1.87856	0.988	0.0100625	0.747431	0	0	-0.0664981
A	37	Y	Hydrophobic	Hydrophobic	6	5.66	-0.34	89	181	92	88.6	193.6	105	112	3.1	S	B	N	N	B	B	378.554	379.024	379.754	helix	interface	interface	0.0775194	3	0	0	0	-0.01	-2.08888	-9.43273	-4.91898	-4.00765	-12.9939	-3.7285	14.3159	-17.2612	7.19797	4.23751	4.03963	3.65855	2.87147	0.0143169	0.011824	0.00177029
S	38	A	Polar	Hydrophobic	5.68	6	0.32	105	89	-16	89	88.6	-0.4	99	-2.6	S	S	P	N	L	B	381.307	381.486	382.801	helix	interface	interface	0	2	0	0	0	-0.1	-0.854146	-3.61649	2.69571	2.77927	1.28271	0.00906494	-4.80238	-2.52288	0.11904	-2.64827	-0.522764	-0.00599079	-0.381916	0	0	0
S	38	N	Polar	Polar	5.68	5.47	-0.21	105	132	27	89	114.1	25.1	46	2.7	S	S	P	P	L	L	381.307	381.486	382.801	helix	interface	interface	0	2	0	0	0	-0.02	2.80144	18.0848	2.05589	0.0176225	-4.84836	-0.0270881	9.76456	-5.88379	13.1891	0.798132	2.72522	0.293524	2.17348	1.31e-08	-1e-06	2.86e-10
S	38	P	Polar	Special	5.68	6.3	0.62	105	115	10	89	112.7	23.7	74	0.8	S	P	P	N	L	P	381.307	381.486	382.801	helix	interface	interface	0	2	0	0	0	0.01	1.16101	11.7744	6.76396	2.7279	-1.66339	-0.0107564	-2.98086	-8.13301	18.86	-1.36702	-2.34333	-0.0434702	-9.49477	-4.37e-06	-3.04e-05	-0.0355918
S	38	T	Polar	Polar	5.68	5.6	-0.08	105	119	14	89	116.1	27.1	58	-0.1	S	S	P	P	L	L	381.307	381.486	382.801	helix	interface	interface	0	2	0	0	0	-0.12	0.40838	0.0253694	-1.11004	-0.403013	-3.58229	0.023029	4.36733	-7.22498	5.28328	-0.0427988	2.23573	0.479144	2.1039	0	-3.55e-15	-3.55e-15
S	38	V	Polar	Hydrophobic	5.68	5.61	-0.07	105	117	12	89	140	51	124	-5	S	S	P	N	L	B	381.307	381.486	382.801	helix	interface	interface	0	2	0	0	0	0.01	0.670962	2.93486	2.01701	3.04742	-5.717	0.0231285	2.23461	-13.8627	12.5684	-0.51256	2.71252	0.42396	3.30047	0	0	-3.55e-15
N	39	A	Polar	Hydrophobic	5.47	6	0.53	132	89	-43	114.1	88.6	-25.5	111	-5.3	S	S	P	N	L	B	378.969	378.311	379.494	loop	interface	interface	0.0615385	4	0	0	1	-0.03	-0.380771	5.02508	0.54884	11.281	5.69232	0.0296981	-10.7883	3.78039	-0.317208	-3.80717	-1.20807	-0.191031	-2.41239	1.31e-08	-1e-06	0.00460824
N	39	C	Polar	Special	5.47	5.07	-0.4	132	121	-11	114.1	108.5	-5.6	139	-6	S	S	P	P	L	C	378.969	378.311	379.494	loop	interface	interface	0.0615385	4	0	0	1	0.01	0.0782287	3.33208	-0.561729	9.0344	2.185	0.0195194	-8.4987	0.432609	-0.0951992	0.21285	0.630409	-0.00511162	-1.07755	1.31e-08	-1e-06	-0.0219693
N	39	E	Polar	negativeCharge	5.47	3.22	-2.25	132	147	15	114.1	138.4	24.3	42	0	S	B	P	-	L	L	378.969	378.311	379.494	loop	interface	interface	0.0615385	4	0	0	1	-0.12	-0.532153	1.20717	-0.617569	1.71035	0.177472	-2.82272	2.12568	-1.24597	-0.307408	3.55609	-0.203337	0.0216466	-1.45159	-0.176095	-0.810957	-0.200019
N	39	F	Polar	Hydrophobic	5.47	3.32	-2.15	132	165	33	114.1	189.9	75.8	158	-6.3	S	B	P	N	L	B	378.969	378.311	379.494	loop	interface	interface	0.0615385	4	0	0	1	0	-0.444473	4.89577	-3.32542	8.09441	-3.70542	0.417811	0.457863	-7.03263	8.58159	0.589445	0.672819	0.207211	-1.83367	1.31e-08	-1e-06	-0.0619253
N	39	G	Polar	Special	5.47	3.29	-2.18	132	75	-57	114.1	60.1	-54	80	-3.1	S	S	P	N	L	B	378.969	378.311	379.494	loop	interface	interface	0.0615385	4	0	0	1	0.01	0.272454	8.39361	0.753619	10.981	8.10696	0.177639	-14.2707	7.03832	-0.375221	-3.88326	-0.044645	0.014612	-2.99335	1.31e-08	-1e-06	-0.104802
N	39	L	Polar	Hydrophobic	5.47	9.71	4.24	132	131	-1	114.1	166.7	52.6	153	-7.3	S	B	P	N	L	B	378.969	378.311	379.494	loop	interface	interface	0.0615385	4	0	0	1	-0.1	-1.02625	-0.335406	0.445987	11.3105	-2.69999	0.0224516	-2.59379	-9.41079	1.83522	1.62074	-1.26726	0.492408	-0.409559	1.31e-08	-9.97e-07	-0.0908539
N	39	M	Polar	Hydrophobic	5.47	5.74	0.27	132	149	17	114.1	162.9	48.8	142	-5.4	S	B	P	N	L	B	378.969	378.311	379.494	loop	interface	interface	0.0615385	4	0	0	1	-0.07	-0.919411	-4.38889	0.0961994	9.87693	-3.41083	-0.0444371	-3.66674	-9.67157	-0.221133	3.07201	-0.428118	0.00879564	-0.422986	1.31e-08	-1e-06	2.87e-10
N	39	P	Polar	Special	5.47	6.3	0.83	132	115	-17	114.1	112.7	-1.4	91	-1.9	S	P	P	N	L	P	378.969	378.311	379.494	loop	interface	interface	0.0615385	4	0	0	1	0.01	1.6457	15.0584	-0.238935	10.4056	2.23052	-0.0769393	-11.0738	-2.22604	24.0719	-2.43804	-5.67933	-0.0110391	-9.25119	0	0	0.0945027
N	39	Q	Polar	Polar	5.47	6.24	0.77	132	146	14	114.1	143.8	29.7	46	0	S	B	P	P	L	L	378.969	378.311	379.494	loop	interface	interface	0.0615385	4	0	0	1	0	0.330617	6.00866	-1.75646	6.70679	-1.43517	-0.0931416	0.307934	-3.00614	0.480946	4.21346	0.560844	-0.00270606	-0.670158	1.31e-08	-1e-06	0.0322984
N	39	R	Polar	PositiveCharge	5.47	6.34	0.87	132	174	42	114.1	173.4	59.3	86	1	S	B	P	+	L	L	378.969	378.311	379.494	loop	interface	interface	0.0615385	4	0	0	1	1.36	0.164959	9.88837	0.165314	9.49854	-1.00102	1.61607	-0.707656	-2.39703	-0.105019	2.6875	-0.668878	0.355363	-1.43833	0.0920242	0.521558	-0.168403
N	39	S	Polar	Polar	5.47	5.68	0.21	132	105	-27	114.1	89	-25.1	46	-2.7	S	S	P	P	L	L	378.969	378.311	379.494	loop	interface	interface	0.0615385	4	0	0	1	0.01	0.264892	3.87227	-2.80964	7.86862	4.60924	-0.116286	-7.60737	5.14529	-0.243791	-1.11113	-1.91643	-0.101809	-1.89254	1.31e-08	-1e-06	0.155573
N	39	T	Polar	Polar	5.47	5.6	0.13	132	119	-13	114.1	116.1	2	65	-2.8	S	S	P	P	L	L	378.969	378.311	379.494	loop	interface	interface	0.0615385	4	0	0	1	0.01	1.17367	4.60833	-1.67571	6.29238	1.1152	-0.431451	-1.63621	-0.419074	-0.271087	-1.04584	2.02823	0.0766263	-0.424084	-0.00859703	-0.00601487	0.58987
N	39	V	Polar	Hydrophobic	5.47	5.61	0.14	132	117	-15	114.1	140	25.9	133	-7.7	S	S	P	N	L	B	378.969	378.311	379.494	loop	interface	interface	0.0615385	4	0	0	1	-0.03	0.396244	4.57215	-0.234838	9.95435	0.299593	0.00434976	-4.29989	-3.66094	1.31733	-1.3474	2.0397	0.584921	-0.819418	1.31e-08	-1e-06	-0.0850211
N	39	W	Polar	Hydrophobic	5.47	5.89	0.42	132	204	72	114.1	227.8	113.7	174	-2.6	S	B	P	N	L	B	378.969	378.311	379.494	loop	interface	interface	0.0615385	4	0	0	1	-0.02	0.548001	12.6331	0.105044	10.6245	-5.01536	-0.122406	3.91526	-7.81944	7.60542	2.01248	1.5268	-0.162485	-1.92963	1.31e-08	-9.99e-07	-0.0366903
S	40	A	Polar	Hydrophobic	5.68	6	0.32	105	89	-16	89	88.6	-0.4	99	-2.6	S	S	P	N	L	B	378.906	378.196	379.102	loop	interface	interface	0.103226	3	0	0	1	-0.02	-0.230586	1.27896	0.13047	5.694	0.472952	1.04277	-3.5944	-1.58224	0.159386	-2.69268	2.30781	-0.55783	0.00156109	-0.0519895	-0.0492909	2.88e-10
S	40	C	Polar	Special	5.68	5.07	-0.61	105	121	16	89	108.5	19.5	112	-3.3	S	S	P	P	L	C	378.906	378.196	379.102	loop	interface	interface	0.103226	3	0	0	1	0.01	0.615392	4.6671	-0.182516	5.74336	-1.71349	-0.362557	0.367536	-3.35497	0.0297867	0.157985	4.02504	-0.0430688	0.0818155	0	0	0
S	40	E	Polar	negativeCharge	5.68	3.22	-2.46	105	147	42	89	138.4	49.4	80	2.7	S	B	P	-	L	L	378.906	378.196	379.102	loop	interface	interface	0.103226	3	0	0	1	0.01	0.83289	-2.71578	-4.58567	-3.5852	-6.04651	-2.56763	13.893	-7.75919	1.06751	3.37528	4.64673	-0.442601	0.348628	-0.0206009	-0.690994	0.000144414
S	40	G	Polar	Special	5.68	3.29	-2.39	105	75	-30	89	60.1	-28.9	56	-0.4	S	S	P	N	L	B	378.906	378.196	379.102	loop	interface	interface	0.103226	3	0	0	1	0.01	0.173723	3.75533	0.423902	5.48419	2.89517	2.00432	-6.77184	1.86903	-0.342758	-2.98451	1.32754	-0.186701	0.0805693	0.00344547	0.03003	0.00350379
S	40	I	Polar	Hydrophobic	5.68	6.02	0.34	105	131	26	89	166.7	77.7	142	-5.3	S	B	P	N	L	B	378.906	378.196	379.102	loop	interface	interface	0.103226	3	0	0	1	0.01	-0.314851	1.21243	-0.236957	5.30476	-6.66409	-0.473247	6.4493	-11.8665	0.31091	1.2282	6.96002	0.256293	0.23318	-0.0322848	-0.0239343	2.89e-10
S	40	K	Polar	PositiveCharge	5.68	9.74	4.06	105	146	41	89	168.6	79.6	121	3.1	S	B	P	+	L	L	378.906	378.196	379.102	loop	interface	interface	0.103226	3	0	0	1	1.32	-0.808238	2.47536	-0.576195	-0.7666	-7.28139	1.75727	10.6352	-10.8376	0.265048	5.27674	4.22753	-0.427143	0.301929	-0.0481892	0.250709	2.89e-10
S	40	L	Polar	Hydrophobic	5.68	9.71	4.03	105	131	26	89	166.7	77.7	145	-4.6	S	B	P	N	L	B	378.906	378.196	379.102	loop	interface	interface	0.103226	3	0	0	1	-0.02	-0.438389	0.0187594	-0.506783	5.84614	-6.32442	0.387591	5.47558	-11.421	0.346624	1.10071	3.43647	1.71712	0.0857275	-0.00259282	-0.0366689	2.89e-10
S	40	N	Polar	Polar	5.68	5.47	-0.21	105	132	27	89	114.1	25.1	46	2.7	S	S	P	P	L	L	378.906	378.196	379.102	loop	interface	interface	0.103226	3	0	0	1	-0.01	0.692423	-0.597281	-0.7555	-2.31657	-3.08914	-0.235963	5.99573	-3.51171	0.280332	0.85446	2.53228	-0.366048	0.116978	0.000737538	0.0141129	2.88e-10
S	40	P	Polar	Special	5.68	6.3	0.62	105	115	10	89	112.7	23.7	74	0.8	S	P	P	N	L	P	378.906	378.196	379.102	loop	interface	interface	0.103226	3	0	0	1	0.01	-0.87239	-6.24512	-0.504913	6.98114	-2.18248	-0.386197	-1.18108	-5.69245	0.0513469	-1.3701	-2.04743	0.0965532	0.348437	0.0011398	-0.0106527	2.89e-10
S	40	Q	Polar	Polar	5.68	6.24	0.56	105	146	41	89	143.8	54.8	68	2.7	S	B	P	P	L	L	378.906	378.196	379.102	loop	interface	interface	0.103226	3	0	0	1	-0.01	-0.249319	-0.121328	-2.21913	-4.34829	-6.58518	-0.295798	9.80228	-8.06426	0.551788	5.88216	5.02751	0.127579	0.0374633	1.34e-08	-9.99e-07	2.89e-10
S	40	R	Polar	PositiveCharge	5.68	6.34	0.66	105	174	69	89	173.4	84.4	110	3.7	S	B	P	+	L	L	378.906	378.196	379.102	loop	interface	interface	0.103226	3	0	0	1	1.33	-1.0785	-7.88609	-8.28298	-8.2143	-10.4141	0.637444	14.5289	-11.1833	-0.17533	6.51391	7.85302	0.705832	0.562694	-0.0430605	0.187916	2.88e-10
S	40	T	Polar	Polar	5.68	5.6	-0.08	105	119	14	89	116.1	27.1	58	-0.1	S	S	P	P	L	L	378.906	378.196	379.102	loop	interface	interface	0.103226	3	0	0	1	0.01	0.360103	1.07863	-0.290061	0.427732	-2.68936	-0.466021	3.70305	-4.76833	0.155346	-0.0427988	5.04653	0.00253437	0.0272939	0	-3.55e-15	-3.55e-15
S	40	V	Polar	Hydrophobic	5.68	5.61	-0.07	105	117	12	89	140	51	124	-5	S	S	P	N	L	B	378.906	378.196	379.102	loop	interface	interface	0.103226	3	0	0	1	0.01	-0.189612	2.58723	-0.802798	6.74061	-4.46788	-0.801844	5.02499	-8.3227	0.149016	-0.514669	5.27873	0.285715	0.132724	0.0018145	0.0162457	2.89e-10
S	40	Y	Polar	Hydrophobic	5.68	5.66	-0.02	105	181	76	89	193.6	104.6	144	0.5	S	B	P	N	L	B	378.906	378.196	379.102	loop	interface	interface	0.103226	3	0	0	1	-0.01	-0.0132616	9.45087	-0.387851	1.50442	-8.34505	2.01179	9.11949	-11.4843	2.7566	1.76518	3.11842	9.43243	0.259028	-0.0189074	-0.0214149	6.73e-05
A	41	C	Hydrophobic	Special	6	5.07	-0.93	89	121	32	88.6	108.5	19.9	195	-0.7	S	S	N	P	B	C	376.289	376.112	377.49	loop	interface	interface	0.0155039	4	0	0	0	0	1.70155	7.35885	-0.153507	-0.0963033	-3.64641	-0.706106	2.94618	-3.29803	6.18523	4.95697	1.68471	0.349369	0.283655	0	0	0
A	41	G	Hydrophobic	Special	6	3.29	-2.71	89	75	-14	88.6	60.1	-28.5	60	2.2	S	S	N	N	B	B	376.289	376.112	377.49	loop	interface	interface	0.0155039	4	0	0	0	0	1.37921	6.39949	0.150402	0.093184	3.78766	1.03459	-4.54034	5.65533	-0.43069	-0.324277	1.14109	-0.213787	-0.793332	0	0	0.0463299
A	41	L	Hydrophobic	Hydrophobic	6	9.71	3.71	89	131	42	88.6	166.7	78.1	96	-2	S	B	N	N	B	B	376.289	376.112	377.49	loop	interface	interface	0.0155039	4	0	0	0	0	4.06548	23.5066	3.95317	3.77341	-8.12305	1.75897	9.67809	-13.6126	23.1971	5.3883	-1.7719	0.953634	1.72699	-2.0042	0.337194	-0.0215472
A	41	P	Hydrophobic	Special	6	6.3	0.3	89	115	26	88.6	112.7	24.1	27	3.4	S	P	N	N	B	P	376.289	376.112	377.49	loop	interface	interface	0.0155039	4	0	0	0	0	-0.569211	-9.14232	1.88992	-1.03938	-3.51586	-1.79248	2.05915	-5.55611	1.51027	1.4718	-3.75055	-0.32484	-0.103045	-0.023701	-0.0705402	2.9e-10
A	41	R	Hydrophobic	PositiveCharge	6	6.34	0.34	89	174	85	88.6	173.4	84.8	112	6.3	S	B	N	+	B	L	376.289	376.112	377.49	loop	interface	interface	0.0155039	4	0	0	0	1.35	6.51024	49.5508	-3.08149	-2.33992	-14.0573	-4.60831	33.7434	-8.31306	34.3227	9.23844	0.567214	5.34889	2.08906	-0.8574	-0.441339	0.02903
A	41	S	Hydrophobic	Polar	6	5.68	-0.32	89	105	16	88.6	89	0.4	99	2.6	S	S	N	P	B	L	376.289	376.112	377.49	loop	interface	interface	0.0155039	4	0	0	0	0	0.686542	3.21559	0.818442	-7.4756	-1.35306	-0.0724331	5.59456	2.51875	1.30243	2.7141	-0.706438	-0.0712246	0.0884989	0.0018762	-0.0557992	2.9e-10
A	41	Y	Hydrophobic	Hydrophobic	6	5.66	-0.34	89	181	92	88.6	193.6	105	112	3.1	S	B	N	N	B	B	376.289	376.112	377.49	loop	interface	interface	0.0155039	4	0	0	0	0	20.9469	67.0191	-2.67156	-7.51106	-13.0423	2.21608	20.5073	-14.2658	72.0764	4.61793	2.23521	3.30195	2.62734	-0.743233	0.266091	0.0320702
N	42	A	Polar	Hydrophobic	5.47	6	0.53	132	89	-43	114.1	88.6	-25.5	111	-5.3	S	S	P	N	L	B	372.647	372.329	373.901	loop	interface	interface	0.528205	2	0	0	0	0	0.210994	0.9782	-0.00377804	0	1.10228	0.170395	-2.38232	0.88389	-0.0179091	-0.798791	2.83571	-0.700491	-0.677401	0	0	-0.110781
N	42	C	Polar	Special	5.47	5.07	-0.4	132	121	-11	114.1	108.5	-5.6	139	-6	S	S	P	P	L	C	372.647	372.329	373.901	loop	interface	interface	0.528205	2	0	0	0	0	0.659384	2.61164	-0.0324923	0.0153209	-0.531181	-0.059656	-0.364019	-0.720641	0.0308623	0.705658	4.104	-0.64583	-0.0520633	0	0	0.109616
N	42	G	Polar	Special	5.47	3.29	-2.18	132	75	-57	114.1	60.1	-54	80	-3.1	S	S	P	N	L	B	372.647	372.329	373.901	loop	interface	interface	0.528205	2	0	0	0	0	1.28544	6.38914	-0.00753271	0.298408	2.68056	0.287196	-4.51594	3.1144	-0.0497301	-0.819002	6.70745	-1.09443	-1.48403	0	0	-0.212239
N	42	H	Polar	PositiveCharge	5.47	7.59	2.12	132	155	23	114.1	153.2	39.1	68	-0.3	S	B	P	+	L	L	372.647	372.329	373.901	loop	interface	interface	0.528205	2	0	0	0	0.12	0.00950725	-0.216264	-0.0478507	-0.114247	-1.81704	-0.220507	2.38773	-2.24477	0.315671	0.850937	0.924967	-0.678732	0.18437	0	0	0.427589
N	42	M	Polar	Hydrophobic	5.47	5.74	0.27	132	149	17	114.1	162.9	48.8	142	-5.4	S	B	P	N	L	B	372.647	372.329	373.901	loop	interface	interface	0.528205	2	0	0	0	0	-0.509263	-2.94255	-0.39338	-0.0226239	-3.80072	-0.337312	3.53434	-5.93208	0.176271	1.68615	2.47579	-0.637409	0.629166	-0.000307101	-0.00177107	0.31051
N	42	S	Polar	Polar	5.47	5.68	0.21	132	105	-27	114.1	89	-25.1	46	-2.7	S	S	P	P	L	L	372.647	372.329	373.901	loop	interface	interface	0.528205	2	0	0	0	0	0.951733	4.53493	0.0158057	0.00675231	1.04532	0.164508	-1.59567	1.8026	0.00110365	-0.243175	4.13838	-0.684915	-0.276544	0	0	-0.115787
N	42	T	Polar	Polar	5.47	5.6	0.13	132	119	-13	114.1	116.1	2	65	-2.8	S	S	P	P	L	L	372.647	372.329	373.901	loop	interface	interface	0.528205	2	0	0	0	0	1.10476	5.4729	0.0161986	0	0.295148	0.13074	0.392117	0.782503	-0.00418492	-0.247114	4.48796	-0.31271	0.606279	0	7.11e-15	-0.0677643
N	42	W	Polar	Hydrophobic	5.47	5.89	0.42	132	204	72	114.1	227.8	113.7	174	-2.6	S	B	P	N	L	B	372.647	372.329	373.901	loop	interface	interface	0.528205	2	0	0	0	0	0.373247	0.795526	0.00798156	-0.257635	-3.36553	-0.637157	3.28421	-5.13801	1.11149	1.64905	3.95229	-0.474232	0.324098	0	3.55e-15	0.663061
N	42	Y	Polar	Hydrophobic	5.47	5.66	0.19	132	181	49	114.1	193.6	79.5	143	-2.2	S	B	P	N	L	B	372.647	372.329	373.901	loop	interface	interface	0.528205	2	0	0	0	0	0.00381678	-0.563188	-0.174402	-0.229981	-4.40996	0.175507	3.87364	-6.27856	0.672958	2.404	3.30659	-0.502866	0.18557	0	0	0.599883
R	43	G	PositiveCharge	Special	6.34	3.29	-3.05	174	75	-99	173.4	60.1	-113.3	125	-4.1	B	S	+	N	L	B	372.685	374.921	378.699	loop	interface	interface	0.0109489	8	0	0	1	-1.36	3.21481	19.3473	3.55428	12.2361	16.623	9.15105	-26.7849	16.0949	-1.00887	-10.9396	-1.27422	-0.447159	-3.2413	1.00307	1.13973	9.47e-10
R	43	L	PositiveCharge	Hydrophobic	6.34	9.71	3.37	174	131	-43	173.4	166.7	-6.7	102	-8.3	B	B	+	N	L	B	372.685	374.921	378.699	loop	interface	interface	0.0109489	8	0	0	1	-1.36	1.47731	3.95962	4.29323	12.0736	4.91517	6.29351	-14.3746	-3.08754	-0.568237	-4.80641	-3.05796	0.125732	0.412775	1.05144	1.10172	9.47e-10
R	43	P	PositiveCharge	Special	6.34	6.3	-0.04	174	115	-59	173.4	112.7	-60.7	103	-2.9	B	P	+	N	L	P	372.685	374.921	378.699	loop	interface	interface	0.0109489	8	0	0	1	-1.36	3.52496	13.6093	5.36451	11.267	10.0983	9.22796	-20.8793	5.56352	4.29018	-8.81119	-4.51351	-0.125269	-9.79703	0.979822	1.1472	9.47e-10
R	43	T	PositiveCharge	Polar	6.34	5.6	-0.74	174	119	-55	173.4	116.1	-57.3	71	-3.8	B	S	+	P	L	L	372.685	374.921	378.699	loop	interface	interface	0.0109489	8	0	0	1	-1.36	3.61235	13.9596	3.79284	9.44305	9.17787	7.35555	-13.9328	7.08622	-0.612205	-8.26856	-1.44865	-0.234769	-0.0455496	0.680133	0.920939	9.47e-10
Q	44	A	Polar	Hydrophobic	6.24	6	-0.24	146	89	-57	143.8	88.6	-55.2	91	-5.3	B	S	P	N	L	B	369.696	370.408	372.434	loop	interface	interface	0.217778	2	0	0	1	0	0.506355	3.63145	2.53217	9.20319	6.82852	-0.0376506	-8.81415	6.81385	-0.402253	-9.80595	-2.17141	-0.539513	-1.03191	0.0198188	0.0048295	9.47e-10
Q	44	C	Polar	Special	6.24	5.07	-1.17	146	121	-25	143.8	108.5	-35.3	154	-6	B	S	P	P	L	C	369.696	370.408	372.434	loop	interface	interface	0.217778	2	0	0	1	0	0.351497	2.91544	2.9427	7.36126	4.49509	-0.039439	-7.83468	4.15573	-0.519321	-6.5215	-0.956218	-0.1694	-0.606641	-0.000103602	0.00131587	9.48e-10
Q	44	D	Polar	negativeCharge	6.24	5.05	-1.19	146	133	-13	143.8	111.1	-32.7	61	0	B	S	P	-	L	L	369.696	370.408	372.434	loop	interface	interface	0.217778	2	0	0	1	0	0.6434	4.13072	2.84722	9.23358	5.98687	0.293431	-6.46025	6.39346	-0.729353	-9.26522	-4.17434	-0.00542409	-0.108266	-0.143307	0.154048	9.48e-10
Q	44	F	Polar	Hydrophobic	6.24	3.32	-2.92	146	165	19	143.8	189.9	46.1	116	-6.3	B	B	P	N	L	B	369.696	370.408	372.434	loop	interface	interface	0.217778	2	0	0	1	0	-0.824002	2.21941	3.09462	9.11869	0.657492	0.102571	-2.17695	-1.284	-0.206782	-5.96951	-1.18323	0.0679586	2.35881	0.000189244	-0.0016416	9.47e-10
Q	44	G	Polar	Special	6.24	3.29	-2.95	146	75	-71	143.8	60.1	-83.7	87	-3.1	B	S	P	N	L	B	369.696	370.408	372.434	loop	interface	interface	0.217778	2	0	0	1	0	0.828178	3.16972	2.64023	9.28696	7.89715	-0.184281	-10.4882	8.05304	-0.355494	-10.0285	-2.9544	-0.709587	-1.60342	0.00439723	0.00843674	9.47e-10
Q	44	I	Polar	Hydrophobic	6.24	6.02	-0.22	146	131	-15	143.8	166.7	22.9	109	-8	B	B	P	N	L	B	369.696	370.408	372.434	loop	interface	interface	0.217778	2	0	0	1	0	-0.015052	0.952407	3.13321	8.91675	2.73825	0.0418097	-5.54409	0.348668	-0.191548	-7.25735	-1.76973	0.536428	0.869724	5.7e-07	-7.71e-07	9.47e-10
Q	44	L	Polar	Hydrophobic	6.24	9.71	3.47	146	131	-15	143.8	166.7	22.9	113	-7.3	B	B	P	N	L	B	369.696	370.408	372.434	loop	interface	interface	0.217778	2	0	0	1	0	-0.831635	-4.32682	3.05874	8.64446	-0.427513	-0.0293499	-2.78183	-4.92597	-0.0170081	-5.20349	-2.45048	-0.186116	0.570956	-0.009422	0.00115969	9.47e-10
Q	44	M	Polar	Hydrophobic	6.24	5.74	-0.5	146	149	3	143.8	162.9	19.1	101	-5.4	B	B	P	N	L	B	369.696	370.408	372.434	loop	interface	interface	0.217778	2	0	0	1	0	-0.817668	-4.11249	2.95943	8.98815	-3.06148	0.0261993	-0.896333	-7.62617	-0.0241622	-3.34517	-0.959453	-0.17436	0.351403	0.000101836	0.00074972	9.47e-10
Q	44	N	Polar	Polar	6.24	5.47	-0.77	146	132	-14	143.8	114.1	-29.7	46	0	B	S	P	P	L	L	369.696	370.408	372.434	loop	interface	interface	0.217778	2	0	0	1	0	0.366282	2.35664	2.84055	8.77284	5.64589	-0.0194609	-6.87032	5.683	-0.526114	-9.06815	-4.2608	0.156138	-0.137516	-0.000244618	0.00330981	9.47e-10
Q	44	P	Polar	Special	6.24	6.3	0.06	146	115	-31	143.8	112.7	-31.1	76	-1.9	B	P	P	N	L	P	369.696	370.408	372.434	loop	interface	interface	0.217778	2	0	0	1	0	2.03104	10.1096	2.81369	9.01636	5.0314	-0.13039	-8.8356	3.59477	3.78463	-8.46302	3.30972	-0.0130075	-8.07731	-0.000256422	0.00129921	9.47e-10
Q	44	R	Polar	PositiveCharge	6.24	6.34	0.1	146	174	28	143.8	173.4	29.6	43	1	B	B	P	+	L	L	369.696	370.408	372.434	loop	interface	interface	0.217778	2	0	0	1	1.36	0.0913873	1.87614	2.76844	1.90836	4.30634	-0.400561	-4.44175	4.66065	-0.619884	-3.19186	-3.58446	0.186384	0.272286	0.293724	-0.00924326	9.47e-10
Q	44	S	Polar	Polar	6.24	5.68	-0.56	146	105	-41	143.8	89	-54.8	68	-2.7	B	S	P	P	L	L	369.696	370.408	372.434	loop	interface	interface	0.217778	2	0	0	1	0	0.796678	5.06295	2.64809	7.9984	6.48527	0.0845237	-7.45042	7.54074	-0.625661	-8.80602	-2.72874	-0.0784837	-0.215754	-0.016482	0.0117372	9.47e-10
Q	44	T	Polar	Polar	6.24	5.6	-0.64	146	119	-27	143.8	116.1	-27.7	42	-2.8	B	S	P	P	L	L	369.696	370.408	372.434	loop	interface	interface	0.217778	2	0	0	1	0	0.475905	3.78831	2.97395	9.08617	5.26256	0.0332223	-7.21821	4.6537	-0.585491	-8.73661	-1.71858	0.0375998	-0.132612	5.68e-07	-7.82e-07	9.47e-10
Q	44	V	Polar	Hydrophobic	6.24	5.61	-0.63	146	117	-29	143.8	140	-3.8	96	-7.7	B	S	P	N	L	B	369.696	370.408	372.434	loop	interface	interface	0.217778	2	0	0	1	0	0.344426	3.30049	3.067	9.11047	4.34359	0.0273645	-6.62296	3.11375	-0.200039	-8.26818	-0.942784	-0.333029	0.616529	-7.76e-05	0.0053858	9.47e-10
Q	44	W	Polar	Hydrophobic	6.24	5.89	-0.35	146	204	58	143.8	227.8	84	130	-2.6	B	B	P	N	L	B	369.696	370.408	372.434	loop	interface	interface	0.217778	2	0	0	1	0	-0.5441	2.13341	3.17484	9.29664	-0.816785	-0.732999	0.403628	-2.90684	0.0645643	-5.42617	-0.807143	-0.146589	3.12687	0.0307041	-0.000442143	9.47e-10
D	45	A	negativeCharge	Hydrophobic	5.05	6	0.95	133	89	-44	111.1	88.6	-22.5	126	-5.3	S	S	-	N	L	B	366.73	366.122	368.055	loop	interface	interface	0.331606	1	0	0	0	0	3.67323	15.2337	3.34739	15.4824	1.86026	1.95102	-4.26344	1.79101	-1.00909	-7.84369	4.1472	-0.965609	-0.11868	0.457457	0.278872	9.47e-10
D	45	C	negativeCharge	Special	5.05	5.07	0.02	133	121	-12	111.1	108.5	-2.6	154	-6	S	S	-	P	L	C	366.73	366.122	368.055	loop	interface	interface	0.331606	1	0	0	0	0	3.13557	11.8621	2.55527	14.5273	-0.545342	1.56718	-2.57771	-0.858943	-0.81379	-5.23345	3.7894	-1.2346	0.883587	0.449073	0.23766	9.47e-10
D	45	F	negativeCharge	Hydrophobic	5.05	3.32	-1.73	133	165	32	111.1	189.9	78.8	177	-6.3	S	B	-	N	L	B	366.73	366.122	368.055	loop	interface	interface	0.331606	1	0	0	0	0	3.04612	13.0778	4.10838	15.9392	-1.79928	1.34888	0.365139	-2.81743	-2.06642	-4.56396	2.85346	-1.06039	0.890965	0.509035	0.235384	0.0258044
D	45	G	negativeCharge	Special	5.05	3.29	-1.76	133	75	-58	111.1	60.1	-51	94	-3.1	S	S	-	N	L	B	366.73	366.122	368.055	loop	interface	interface	0.331606	1	0	0	0	0	2.80158	14.3954	3.34122	15.5121	2.97485	1.92676	-6.25956	3.29549	-1.01436	-8.27583	3.20646	-1.04578	-0.527589	0.454964	0.279056	9.47e-10
D	45	H	negativeCharge	PositiveCharge	5.05	7.59	2.54	133	155	22	111.1	153.2	42.1	81	-0.3	S	B	-	+	L	L	366.73	366.122	368.055	loop	interface	interface	0.331606	1	0	0	0	0.12	3.90882	14.3066	3.40484	14.236	-0.28834	1.13784	-0.563565	-0.343111	-0.643878	-4.8414	2.31621	-1.09422	0.145672	0.453432	0.233292	0.299549
D	45	I	negativeCharge	Hydrophobic	5.05	6.02	0.97	133	131	-2	111.1	166.7	55.6	168	-8	S	B	-	N	L	B	366.73	366.122	368.055	loop	interface	interface	0.331606	1	0	0	0	0	2.83347	12.3518	3.46927	15.5986	-2.24024	1.59643	0.735343	-4.37207	-0.716421	-4.77142	2.57188	-0.19168	1.61878	0.431989	0.264307	-0.0242269
D	45	L	negativeCharge	Hydrophobic	5.05	9.71	4.66	133	131	-2	111.1	166.7	55.6	172	-7.3	S	B	-	N	L	B	366.73	366.122	368.055	loop	interface	interface	0.331606	1	0	0	0	0	3.05214	12.3089	3.36935	12.883	-2.38158	1.23576	2.3701	-3.89681	-0.777827	-2.68599	2.9951	-1.47518	1.42533	0.473406	0.173789	0.0257933
D	45	M	negativeCharge	Hydrophobic	5.05	5.74	0.69	133	149	16	111.1	162.9	51.8	160	-5.4	S	B	-	N	L	B	366.73	366.122	368.055	loop	interface	interface	0.331606	1	0	0	0	0	2.94549	12.3521	3.88683	16.1748	-4.99426	1.35239	3.69861	-8.42309	-2.03017	-3.08369	3.01859	2.05226	1.59235	0.452174	0.249174	-0.00157984
D	45	N	negativeCharge	Polar	5.05	5.47	0.42	133	132	-1	111.1	114.1	3	23	0	S	S	-	P	L	L	366.73	366.122	368.055	loop	interface	interface	0.331606	1	0	0	0	0	2.58417	8.58215	1.57554	7.74839	-0.502492	1.18581	-0.391014	-0.608929	-0.365688	-0.833108	0.356389	-0.256324	0.0832273	0.434673	0.238906	9.47e-10
D	45	P	negativeCharge	Special	5.05	6.3	1.25	133	115	-18	111.1	112.7	1.6	108	-1.9	S	P	-	N	L	P	366.73	366.122	368.055	loop	interface	interface	0.331606	1	0	0	0	0	2.64732	12.7078	3.39452	15.3651	-0.427903	1.88443	-3.6517	-1.88474	3.58753	-6.54784	0.911188	-0.656534	-2.58197	0.473653	0.260127	9.47e-10
D	45	Q	negativeCharge	Polar	5.05	6.24	1.19	133	146	13	111.1	143.8	32.7	61	0	S	B	-	P	L	L	366.73	366.122	368.055	loop	interface	interface	0.331606	1	0	0	0	0	3.56642	13.8577	1.66197	8.25223	-2.81094	0.371382	4.83758	-2.82346	-1.4307	2.90196	2.55915	-0.362398	0.557845	0.461167	0.239738	9.47e-10
D	45	R	negativeCharge	PositiveCharge	5.05	6.34	1.29	133	174	41	111.1	173.4	62.3	96	1	S	B	-	+	L	L	366.73	366.122	368.055	loop	interface	interface	0.331606	1	0	0	0	1.36	2.24731	8.7539	-3.18721	8.29407	-6.26637	-3.80153	11.5122	-4.66438	-0.391172	3.72534	2.32737	-0.250432	1.97131	1.95775	-0.50171	2.71e-10
D	45	S	negativeCharge	Polar	5.05	5.68	0.63	133	105	-28	111.1	89	-22.1	65	-2.7	S	S	-	P	L	L	366.73	366.122	368.055	loop	interface	interface	0.331606	1	0	0	0	0	3.4648	16.427	2.62932	14.1457	1.78652	2.07329	-3.62305	2.78396	0.0939314	-6.85392	3.69485	-1.00202	0.328684	0.42897	0.269441	9.47e-10
D	45	T	negativeCharge	Polar	5.05	5.6	0.55	133	119	-14	111.1	116.1	5	85	-2.8	S	S	-	P	L	L	366.73	366.122	368.055	loop	interface	interface	0.331606	1	0	0	0	0	3.4661	15.1628	4.3745	16.1712	0.161971	1.06979	-0.879733	-0.223531	-1.79726	-6.00707	1.82806	-0.247905	0.359516	0.461514	0.251288	9.47e-10
D	45	V	negativeCharge	Hydrophobic	5.05	5.61	0.56	133	117	-16	111.1	140	28.9	152	-7.7	S	S	-	N	L	B	366.73	366.122	368.055	loop	interface	interface	0.331606	1	0	0	0	0	3.46411	14.5304	3.36819	15.2347	-0.443448	1.39651	-0.194972	-1.09608	-0.765651	-5.8467	2.63298	-0.389985	1.10851	0.412343	0.222471	9.47e-10
D	45	W	negativeCharge	Hydrophobic	5.05	5.89	0.84	133	204	71	111.1	227.8	116.7	181	-2.6	S	B	-	N	L	B	366.73	366.122	368.055	loop	interface	interface	0.331606	1	0	0	0	0	3.32119	14.5654	3.44689	14.3282	-1.6791	0.79792	1.60766	-2.26971	-0.80046	-4.09928	3.74733	-1.28174	1.10569	0.47459	0.266343	0.0267662
D	45	Y	negativeCharge	Hydrophobic	5.05	5.66	0.61	133	181	48	111.1	193.6	82.5	160	-2.2	S	B	-	N	L	B	366.73	366.122	368.055	loop	interface	interface	0.331606	1	0	0	0	0	2.9692	12.918	4.25092	14.7407	-1.5184	0.861145	-0.143739	-2.4565	-1.87196	-3.43895	2.84466	-1.04979	0.916987	0.491525	0.208785	-0.000419844
F	46	A	Hydrophobic	Hydrophobic	3.32	6	2.68	165	89	-76	189.9	88.6	-101.3	113	1	B	S	N	N	B	B	364.426	365.641	368.434	loop	interface	interface	0.120833	6	0	0	0	0	2.28189	12.2033	3.16687	3.34218	14.816	-0.013627	-14.1501	19.6091	-0.796091	-10.8653	-2.63716	-0.268695	-3.48876	4.54e-07	-6.54e-07	9.47e-10
F	46	C	Hydrophobic	Special	3.32	5.07	1.75	165	121	-44	189.9	108.5	-81.4	205	0.3	B	S	N	P	B	C	364.426	365.641	368.434	loop	interface	interface	0.120833	6	0	0	0	0	2.3244	12.1917	3.32135	3.18662	12.0969	-0.00172112	-11.9368	16.6929	-0.163436	-7.89402	-2.34874	-0.761388	-2.61696	4.54e-07	-6.54e-07	9.47e-10
F	46	D	Hydrophobic	negativeCharge	3.32	5.05	1.73	165	133	-32	189.9	111.1	-78.8	177	6.3	B	S	N	-	B	L	364.426	365.641	368.434	loop	interface	interface	0.120833	6	0	0	0	0	3.00888	18.4776	3.41796	3.18399	11.3419	0.801893	-3.40512	16.5451	-0.514498	-7.92409	-4.46442	-0.473214	-2.91728	-0.269769	0.237937	9.47e-10
F	46	E	Hydrophobic	negativeCharge	3.32	3.22	-0.1	165	147	-18	189.9	138.4	-51.5	140	6.3	B	B	N	-	B	L	364.426	365.641	368.434	loop	interface	interface	0.120833	6	0	0	0	0	2.68523	16.9648	4.17408	-2.81773	8.93168	-0.55325	0.360754	13.5368	0.380597	-3.56337	-2.57708	-0.937278	-0.272617	-0.193246	0.222814	9.47e-10
F	46	G	Hydrophobic	Special	3.32	3.29	-0.03	165	75	-90	189.9	60.1	-129.8	153	3.2	B	S	N	N	B	B	364.426	365.641	368.434	loop	interface	interface	0.120833	6	0	0	0	0	2.15213	13.0491	3.71594	4.01302	16.9971	-0.0170679	-16.4079	22.6035	-0.950501	-11.1301	-4.2128	-1.55578	-4.99665	-0.0044505	-0.00183029	9.47e-10
F	46	H	Hydrophobic	PositiveCharge	3.32	7.59	4.27	165	155	-10	189.9	153.2	-36.7	100	6	B	B	N	+	B	L	364.426	365.641	368.434	loop	interface	interface	0.120833	6	0	0	0	0.12	3.15319	12.6359	-1.96342	-2.39991	2.56037	-0.148048	3.82119	7.08158	0.269165	-0.078198	2.52796	0.456257	-0.265753	4.54e-07	-6.54e-07	0.508909
F	46	I	Hydrophobic	Hydrophobic	3.32	6.02	2.7	165	131	-34	189.9	166.7	-23.2	21	-1.7	B	B	N	N	B	B	364.426	365.641	368.434	loop	interface	interface	0.120833	6	0	0	0	0	4.30177	22.0243	3.17298	2.89802	6.47358	0.033888	-5.79712	6.81393	10.2252	-6.04341	-0.747512	4.99468	0.662485	4.54e-07	-7.49e-07	9.47e-10
F	46	K	Hydrophobic	PositiveCharge	3.32	9.74	6.42	165	146	-19	189.9	168.6	-21.3	102	6.7	B	B	N	+	B	L	364.426	365.641	368.434	loop	interface	interface	0.120833	6	0	0	0	1.36	2.36525	12.3786	-5.20641	-5.82334	3.52076	-0.224218	7.19175	6.48264	0.627335	3.80762	1.9154	0.124133	-0.466758	0.237211	-0.274254	9.47e-10
F	46	L	Hydrophobic	Hydrophobic	3.32	9.71	6.39	165	131	-34	189.9	166.7	-23.2	22	-1	B	B	N	N	B	B	364.426	365.641	368.434	loop	interface	interface	0.120833	6	0	0	0	0	0.832799	3.00094	2.7809	3.37113	6.26134	0.0417973	-6.17135	6.44597	-0.422834	-6.25112	-2.68156	-0.373326	0.757424	4.55e-07	-7.51e-07	9.47e-10
F	46	M	Hydrophobic	Hydrophobic	3.32	5.74	2.42	165	149	-16	189.9	162.9	-27	28	0.9	B	B	N	N	B	B	364.426	365.641	368.434	loop	interface	interface	0.120833	6	0	0	0	0	1.2764	5.55013	1.76465	2.28036	3.0703	0.0170766	-2.97123	3.97315	0.287696	-3.46646	0.873318	-0.278718	2.08152	4.52e-07	-7.81e-07	9.47e-10
F	46	N	Hydrophobic	Polar	3.32	5.47	2.15	165	132	-33	189.9	114.1	-75.8	158	6.3	B	S	N	P	B	L	364.426	365.641	368.434	loop	interface	interface	0.120833	6	0	0	0	0	2.2744	12.8761	-1.395	-0.935709	6.64889	-0.0152861	-1.11722	12.3828	-0.530666	-1.46551	-0.144758	-0.551462	-1.99487	4.54e-07	-6.54e-07	9.47e-10
F	46	P	Hydrophobic	Special	3.32	6.3	2.98	165	115	-50	189.9	112.7	-77.2	114	4.4	B	P	N	N	B	P	364.426	365.641	368.434	loop	interface	interface	0.120833	6	0	0	0	0	2.46331	14.0968	3.3804	3.10857	12.2238	-0.112535	-13.4069	14.4228	7.35233	-8.73234	-3.56301	-0.576282	-7.00323	4.54e-07	-6.54e-07	9.47e-10
F	46	Q	Hydrophobic	Polar	3.32	6.24	2.92	165	146	-19	189.9	143.8	-46.1	116	6.3	B	B	N	P	B	L	364.426	365.641	368.434	loop	interface	interface	0.120833	6	0	0	0	0	1.93543	11.7579	-1.72261	-2.49066	5.6467	-0.00883222	-1.78033	9.76478	0.111743	0.76215	1.4591	0.0158741	-0.871608	4.54e-07	-6.54e-07	9.47e-10
F	46	R	Hydrophobic	PositiveCharge	3.32	6.34	3.02	165	174	9	189.9	173.4	-16.5	97	7.3	B	B	N	+	B	L	364.426	365.641	368.434	loop	interface	interface	0.120833	6	0	0	0	1.36	2.6457	11.9401	-2.68127	-4.75033	1.65022	-0.425614	4.31056	6.72473	0.273167	5.0607	2.12346	-0.162448	-0.63823	0.235962	-0.419081	9.47e-10
F	46	S	Hydrophobic	Polar	3.32	5.68	2.36	165	105	-60	189.9	89	-100.9	155	3.6	B	S	N	P	B	L	364.426	365.641	368.434	loop	interface	interface	0.120833	6	0	0	0	0	3.11803	16.5724	3.2893	3.27872	14.0604	0.0198928	-10.9723	20.6864	-0.344552	-9.53728	-3.09049	-0.817654	-3.1299	4.54e-07	-6.54e-07	9.47e-10
F	46	T	Hydrophobic	Polar	3.32	5.6	2.28	165	119	-46	189.9	116.1	-73.8	103	3.5	B	S	N	P	B	L	364.426	365.641	368.434	loop	interface	interface	0.120833	6	0	0	0	0	3.79853	19.0791	3.19518	3.47819	11.9144	0.00392103	-8.63551	16.7018	3.30722	-8.50711	-2.08256	-0.296364	-2.64894	4.54e-07	-6.54e-07	9.47e-10
F	46	V	Hydrophobic	Hydrophobic	3.32	5.61	2.29	165	117	-48	189.9	140	-49.9	50	-1.4	B	S	N	N	B	B	364.426	365.641	368.434	loop	interface	interface	0.120833	6	0	0	0	0	3.1648	17.5852	3.47172	3.45011	9.99865	-0.0342645	-9.14964	11.9913	8.12376	-7.80706	-1.72836	-0.731036	-1.77321	4.54e-07	-6.54e-07	9.47e-10
F	46	W	Hydrophobic	Hydrophobic	3.32	5.89	2.57	165	204	39	189.9	227.8	37.9	40	3.7	B	B	N	N	B	B	364.426	365.641	368.434	loop	interface	interface	0.120833	6	0	0	0	0	1.8903	8.97162	0.0604578	0.022647	-2.19481	-0.286741	5.08782	-1.53215	4.1867	1.12522	2.56908	-0.0666118	0.671934	4.55e-07	-7.48e-07	9.47e-10
F	46	Y	Hydrophobic	Hydrophobic	3.32	5.66	2.34	165	181	16	189.9	193.6	3.7	22	4.1	B	B	N	N	B	B	364.426	365.641	368.434	loop	interface	interface	0.120833	6	0	0	0	0	0.843058	4.21907	0.0140425	-2.81585	-0.778136	0.53079	2.66523	0.7562	2.06105	1.50621	0.268804	0.0254973	0.0828391	0.00167674	-0.0164494	9.47e-10
T	47	A	Polar	Hydrophobic	5.6	6	0.4	119	89	-30	116.1	88.6	-27.5	58	-2.5	S	S	P	N	L	B	361.419	361.466	362.733	loop	interface	interface	0.430233	1	0	0	0	0	0.542324	0.359782	0.0581356	8.62847	1.328	0.0779406	-3.40827	1.03017	-1.24375	-3.13329	-2.40592	-0.571679	-0.110075	0.00415218	-0.00416855	9.47e-10
T	47	C	Polar	Special	5.6	5.07	-0.53	119	121	2	116.1	108.5	-7.6	149	-3.2	S	S	P	P	L	C	361.419	361.466	362.733	loop	interface	interface	0.430233	1	0	0	0	0	1.23155	3.0935	-0.0211833	8.39819	-0.111283	0.0576964	-1.82287	-0.539133	-0.809017	-1.12211	-0.487407	-0.449226	-0.0656566	-0.00293577	0.00278589	9.47e-10
T	47	D	Polar	negativeCharge	5.6	5.05	-0.55	119	133	14	116.1	111.1	-5	85	2.8	S	S	P	-	L	L	361.419	361.466	362.733	loop	interface	interface	0.430233	1	0	0	0	0	1.48072	3.33641	0	8.41956	0.826547	2.7639	-2.42767	0.33095	-0.946439	-2.14705	-2.56957	-0.513672	-0.0660404	-0.269885	-0.130266	0
T	47	E	Polar	negativeCharge	5.6	3.22	-2.38	119	147	28	116.1	138.4	22.3	65	2.8	S	B	P	-	L	L	361.419	361.466	362.733	loop	interface	interface	0.430233	1	0	0	0	0	1.3942	2.43111	-0.034223	8.33678	-0.0369016	1.96713	-1.16445	-0.708019	-1.13813	-1.85139	-1.9836	-0.632759	0.0530891	-0.209574	-0.113744	9.47e-10
T	47	F	Polar	Hydrophobic	5.6	3.32	-2.28	119	165	46	116.1	189.9	73.8	103	-3.5	S	B	P	N	L	B	361.419	361.466	362.733	loop	interface	interface	0.430233	1	0	0	0	0	0.828718	1.28077	-0.0343813	8.38362	-2.49605	-1.24202	1.92529	-4.15116	-0.951148	0.71921	-0.419695	-0.497328	0.156408	0.0107212	0.0337057	9.47e-10
T	47	G	Polar	Special	5.6	3.29	-2.31	119	75	-44	116.1	60.1	-56	59	-0.3	S	S	P	N	L	B	361.419	361.466	362.733	loop	interface	interface	0.430233	1	0	0	0	0	0.647895	0.624067	-0.156809	8.27426	2.94222	0.134172	-5.774	3.43442	-1.15521	-3.45433	-3.30613	-0.317578	-0.381423	-0.0188607	0.0219313	9.47e-10
T	47	H	Polar	PositiveCharge	5.6	7.59	1.99	119	155	36	116.1	153.2	37.1	47	2.5	S	B	P	+	L	L	361.419	361.466	362.733	loop	interface	interface	0.430233	1	0	0	0	0.12	0.752512	0.653138	-0.195344	-0.261925	-0.288628	-0.601078	2.21536	0.112945	-1.23504	1.39435	-0.304434	-0.481076	0.225604	0.0190846	0.0350109	0.243912
T	47	I	Polar	Hydrophobic	5.6	6.02	0.42	119	131	12	116.1	166.7	50.6	89	-5.2	S	B	P	N	L	B	361.419	361.466	362.733	loop	interface	interface	0.430233	1	0	0	0	0	1.81532	5.63848	0.0389809	8.46937	-2.21134	-0.159808	2.53976	-4.05608	2.18852	-0.352619	-0.45923	-0.35908	0.314008	0.00174246	-0.00173699	9.47e-10
T	47	K	Polar	PositiveCharge	5.6	9.74	4.14	119	146	27	116.1	168.6	52.5	78	3.2	S	B	P	+	L	L	361.419	361.466	362.733	loop	interface	interface	0.430233	1	0	0	0	1.36	0.81675	0.884178	0.00540549	8.39758	-0.946507	-1.35324	0.530128	-1.99654	-1.15314	-0.206154	-1.81945	-0.48667	-0.0363992	0.0645336	-0.151777	9.47e-10
T	47	L	Polar	Hydrophobic	5.6	9.71	4.11	119	131	12	116.1	166.7	50.6	92	-4.5	S	B	P	N	L	B	361.419	361.466	362.733	loop	interface	interface	0.430233	1	0	0	0	0	0.783068	0.16062	-0.0243815	8.27426	-2.20259	-0.513659	2.60501	-4.03418	-0.932897	-0.326865	-2.32059	-0.464074	0.437026	0.0256265	0.0749624	9.47e-10
T	47	M	Polar	Hydrophobic	5.6	5.74	0.14	119	149	30	116.1	162.9	46.8	81	-2.6	S	B	P	N	L	B	361.419	361.466	362.733	loop	interface	interface	0.430233	1	0	0	0	0	0.636589	-0.410767	-0.0171056	8.27936	-3.84951	-0.668316	3.9586	-6.60382	-0.768656	1.26613	-1.52079	-0.566547	0.461539	0.0365735	0.0433207	9.47e-10
T	47	N	Polar	Polar	5.6	5.47	-0.13	119	132	13	116.1	114.1	-2	65	2.8	S	S	P	P	L	L	361.419	361.466	362.733	loop	interface	interface	0.430233	1	0	0	0	0	1.1639	0.552062	0.00284487	0.131936	-0.30654	-0.194303	1.04306	-0.112885	-1.17041	0.848807	0.760558	-0.448056	0.27406	0.00211631	-0.00506568	9.47e-10
T	47	P	Polar	Special	5.6	6.3	0.7	119	115	-4	116.1	112.7	-3.4	38	0.9	S	P	P	N	L	P	361.419	361.466	362.733	loop	interface	interface	0.430233	1	0	0	0	0	2.0277	7.85383	3.51614	15.521	-0.239685	0.778944	-4.21612	-2.2229	7.05049	-4.36312	-6.79843	-1.34861	-3.45309	0.0870686	0.0890241	9.47e-10
T	47	Q	Polar	Polar	5.6	6.24	0.64	119	146	27	116.1	143.8	27.7	42	2.8	S	B	P	P	L	L	361.419	361.466	362.733	loop	interface	interface	0.430233	1	0	0	0	0	0.977612	1.45661	-0.0296757	1.10399	-2.30119	-0.304869	5.05919	-2.95908	-0.874331	3.94443	-1.73178	-0.420001	0.512771	0.00249004	-0.0325639	9.47e-10
T	47	R	Polar	PositiveCharge	5.6	6.34	0.74	119	174	55	116.1	173.4	57.3	71	3.8	S	B	P	+	L	L	361.419	361.466	362.733	loop	interface	interface	0.430233	1	0	0	0	1.36	0.646544	-0.432964	0.0312058	8.49674	-0.230097	-1.96203	-1.2944	-1.17451	-1.14888	-0.776581	-2.31072	-0.207509	-0.0303757	0.138351	0.00546285	9.47e-10
T	47	S	Polar	Polar	5.6	5.68	0.08	119	105	-14	116.1	89	-27.1	58	0.1	S	S	P	P	L	L	361.419	361.466	362.733	loop	interface	interface	0.430233	1	0	0	0	0	-0.966371	-2.88659	0	0.362469	0.961235	0.0468504	-1.53614	1.94516	-1.11954	-0.430705	-2.65613	-0.459787	0.166061	0	0	0
T	47	V	Polar	Hydrophobic	5.6	5.61	0.01	119	117	-2	116.1	140	23.9	69	-4.9	S	S	P	N	L	B	361.419	361.466	362.733	loop	interface	interface	0.430233	1	0	0	0	0	2.09134	7.51335	0.0152333	8.48113	-1.00573	-0.0738418	0.925017	-1.94295	2.17198	-1.32022	0.460233	-0.197561	0.235095	0.00306399	-0.00300585	9.47e-10
T	47	W	Polar	Hydrophobic	5.6	5.89	0.29	119	204	85	116.1	227.8	111.7	128	0.2	S	B	P	N	L	B	361.419	361.466	362.733	loop	interface	interface	0.430233	1	0	0	0	0	1.26396	2.66422	0.0639302	5.78087	-1.40552	-0.103028	1.77317	-2.05261	-1.20126	0.627122	-0.249824	-0.559907	0.199401	-0.0135308	0.0048073	9.47e-10
T	47	Y	Polar	Hydrophobic	5.6	5.66	0.06	119	181	62	116.1	193.6	77.5	92	0.6	S	B	P	N	L	B	361.419	361.466	362.733	loop	interface	interface	0.430233	1	0	0	0	0	0.763127	2.13233	0.0432227	8.54039	-1.78746	-1.27681	1.32521	-3.02229	-1.19679	0.291423	-0.259123	-0.525428	0.0430952	0.0022024	-0.00221817	9.47e-10
Q	48	A	Polar	Hydrophobic	6.24	6	-0.24	146	89	-57	143.8	88.6	-55.2	91	-5.3	B	S	P	N	L	B	359.462	359.665	360.884	loop	interface	interface	0.231111	3	0	0	0	0	1.27869	5.04107	-0.795946	7.63545	4.96667	1.20266	-8.28291	4.57647	1.35855	-6.90771	1.42907	-0.117272	-0.320288	-0.024169	0.000194403	9.47e-10
Q	48	C	Polar	Special	6.24	5.07	-1.17	146	121	-25	143.8	108.5	-35.3	154	-6	B	S	P	P	L	C	359.462	359.665	360.884	loop	interface	interface	0.231111	3	0	0	0	0	1.09406	2.63352	-0.994761	7.56741	2.56079	1.004	-6.54939	2.1351	-0.107541	-4.46037	1.55518	-0.0768936	0.168958	0	-3.55e-15	0
Q	48	D	Polar	negativeCharge	6.24	5.05	-1.19	146	133	-13	143.8	111.1	-32.7	61	0	B	S	P	-	L	L	359.462	359.665	360.884	loop	interface	interface	0.231111	3	0	0	0	0	1.67113	6.04308	-0.802062	7.54344	4.17848	3.00495	-6.56871	3.8943	1.19448	-6.5061	0.192772	-0.0667417	-0.117871	-0.241891	0.22016	9.47e-10
Q	48	E	Polar	negativeCharge	6.24	3.22	-3.02	146	147	1	143.8	138.4	-5.4	29	0	B	B	P	-	L	L	359.462	359.665	360.884	loop	interface	interface	0.231111	3	0	0	0	0	1.0138	4.27974	0.0548894	6.61889	1.47796	0.28928	-0.0595333	1.18359	-0.751627	-3.85353	-0.735887	-0.0218555	-0.0503249	-0.223728	0.301288	9.47e-10
Q	48	F	Polar	Hydrophobic	6.24	3.32	-2.92	146	165	19	143.8	189.9	46.1	116	-6.3	B	B	P	N	L	B	359.462	359.665	360.884	loop	interface	interface	0.231111	3	0	0	0	0	1.36559	3.9381	0.0105281	8.3812	2.16012	1.24519	-4.27215	1.20772	-0.324674	-5.34101	-0.580987	1.45217	0.297728	0	0	0
Q	48	G	Polar	Special	6.24	3.29	-2.95	146	75	-71	143.8	60.1	-83.7	87	-3.1	B	S	P	N	L	B	359.462	359.665	360.884	loop	interface	interface	0.231111	3	0	0	0	0	1.5332	6.61321	-0.89601	7.61537	6.28946	1.24939	-9.98045	6.63897	0.798128	-6.97575	1.8953	-0.0103337	-0.416631	-0.00204993	-0.00880282	9.47e-10
Q	48	I	Polar	Hydrophobic	6.24	6.02	-0.22	146	131	-15	143.8	166.7	22.9	109	-8	B	B	P	N	L	B	359.462	359.665	360.884	loop	interface	interface	0.231111	3	0	0	0	0	0.356358	-1.09747	2.9254	10.7868	-0.743948	-0.0110221	-3.11529	-5.37925	-4.0484	-3.9954	-0.0697878	2.48104	0.0884466	0.0733227	-0.000928863	9.47e-10
Q	48	L	Polar	Hydrophobic	6.24	9.71	3.47	146	131	-15	143.8	166.7	22.9	113	-7.3	B	B	P	N	L	B	359.462	359.665	360.884	loop	interface	interface	0.231111	3	0	0	0	0	-0.886924	-6.30802	-0.0186838	7.85536	-1.30079	-0.0909673	-2.91935	-5.96028	-0.268963	-3.43681	-0.170103	0.00255927	0.31565	0	-3.55e-15	0
Q	48	M	Polar	Hydrophobic	6.24	5.74	-0.5	146	149	3	143.8	162.9	19.1	101	-5.4	B	B	P	N	L	B	359.462	359.665	360.884	loop	interface	interface	0.231111	3	0	0	0	0	-1.14399	-6.43841	-0.233577	7.42771	-3.49936	-0.138045	-1.05171	-6.95358	0.649989	-1.84825	-0.902109	0.110521	0.587467	0	0	0
Q	48	N	Polar	Polar	6.24	5.47	-0.77	146	132	-14	143.8	114.1	-29.7	46	0	B	S	P	P	L	L	359.462	359.665	360.884	loop	interface	interface	0.231111	3	0	0	0	0	1.05628	0.391004	-2.5953	2.17528	0.543933	0.717833	0.0792217	1.76934	0.241218	-3.41882	0.932867	-0.0545714	0.382825	0	-3.55e-15	0
Q	48	P	Polar	Special	6.24	6.3	0.06	146	115	-31	143.8	112.7	-31.1	76	-1.9	B	P	P	N	L	P	359.462	359.665	360.884	loop	interface	interface	0.231111	3	0	0	0	0	3.01594	11.8251	0.170742	8.1728	4.82293	0.919011	-8.73459	4.10622	1.06326	-6.41208	7.77195	-0.0551676	-1.13082	0	0	0
Q	48	R	Polar	PositiveCharge	6.24	6.34	0.1	146	174	28	143.8	173.4	29.6	43	1	B	B	P	+	L	L	359.462	359.665	360.884	loop	interface	interface	0.231111	3	0	0	0	1.36	0.60879	0.802021	-0.00375301	5.93055	1.85027	-1.13438	-4.05379	1.27344	0.095302	-3.14568	-0.0609079	0.345031	-0.135826	0.0473706	-0.34144	9.47e-10
Q	48	S	Polar	Polar	6.24	5.68	-0.56	146	105	-41	143.8	89	-54.8	68	-2.7	B	S	P	P	L	L	359.462	359.665	360.884	loop	interface	interface	0.231111	3	0	0	0	0	1.16721	4.10309	-2.10191	7.09613	3.83552	0.675494	-4.86516	4.87476	-1.61729	-4.53977	1.09447	-0.321763	-0.240186	0.00455382	-0.031931	9.47e-10
Q	48	T	Polar	Polar	6.24	5.6	-0.64	146	119	-27	143.8	116.1	-27.7	42	-2.8	B	S	P	P	L	L	359.462	359.665	360.884	loop	interface	interface	0.231111	3	0	0	0	0	0.472377	-0.148934	-2.55265	4.9603	2.41777	0.885073	-4.37387	1.84601	-0.426118	-4.08822	0.742129	0.395088	0.0444617	0.0199165	0.0256273	9.47e-10
Q	48	V	Polar	Hydrophobic	6.24	5.61	-0.63	146	117	-29	143.8	140	-3.8	96	-7.7	B	S	P	N	L	B	359.462	359.665	360.884	loop	interface	interface	0.231111	3	0	0	0	0	1.36675	5.61044	-0.0418125	7.94997	2.31582	0.861384	-4.95607	0.793663	0.313465	-5.65291	2.58157	1.44584	0.0973567	-8.44e-05	-0.000396906	9.47e-10
Q	48	Y	Polar	Hydrophobic	6.24	5.66	-0.58	146	181	35	143.8	193.6	49.8	99	-2.2	B	B	P	N	L	B	359.462	359.665	360.884	loop	interface	interface	0.231111	3	0	0	0	0	1.4404	5.07294	0.063925	9.68459	2.2883	1.05363	-4.44527	1.12175	0.19663	-5.95695	0.343372	0.768162	0.173659	-0.0195494	-0.0256577	9.47e-10
D	49	A	negativeCharge	Hydrophobic	5.05	6	0.95	133	89	-44	111.1	88.6	-22.5	126	-5.3	S	S	-	N	L	B	356.681	356.192	357.951	loop	interface	interface	0.487047	1	0	0	0	0	-0.080808	-0.622151	0.097609	0.0976102	0.776155	-0.654991	-1.94854	0.756954	-0.114617	-0.371125	1.81647	0.125963	-0.142818	0.0407629	-1.2444	9.47e-10
D	49	C	negativeCharge	Special	5.05	5.07	0.02	133	121	-12	111.1	108.5	-2.6	154	-6	S	S	-	P	L	C	356.681	356.192	357.951	loop	interface	interface	0.487047	1	0	0	0	0	-0.188584	-1.55891	0.017237	-0.0771219	-0.197343	-0.606062	-1.01367	-0.453199	0.397141	1.04729	0.54466	0.00722542	-0.0251729	0.0200701	-1.24515	-9.47e-10
D	49	F	negativeCharge	Hydrophobic	5.05	3.32	-1.73	133	165	32	111.1	189.9	78.8	177	-6.3	S	B	-	N	L	B	356.681	356.192	357.951	loop	interface	interface	0.487047	1	0	0	0	0	-0.693526	-3.46163	-0.250958	-0.231707	-3.02452	-0.646174	1.78748	-4.86082	0.062796	1.84088	3.26366	-0.207582	1.15	0.0203367	-1.21503	9.47e-10
D	49	G	negativeCharge	Special	5.05	3.29	-1.76	133	75	-58	111.1	60.1	-51	94	-3.1	S	S	-	N	L	B	356.681	356.192	357.951	loop	interface	interface	0.487047	1	0	0	0	0	0.976194	5.01295	0.216694	0.575385	2.32264	-0.249963	-4.12737	3.09951	-0.0500225	-0.343092	5.15863	-0.416893	-0.456816	0.0357496	-1.20831	9.47e-10
D	49	H	negativeCharge	PositiveCharge	5.05	7.59	2.54	133	155	22	111.1	153.2	42.1	81	-0.3	S	B	-	+	L	L	356.681	356.192	357.951	loop	interface	interface	0.487047	1	0	0	0	0.12	-0.163598	-1.83212	0.00415694	0.0498966	-0.825126	-1.07238	0.224592	-1.34472	-0.235563	0.895687	1.27321	0.0367288	-0.398483	0.0395473	-1.53087	0.652712
D	49	I	negativeCharge	Hydrophobic	5.05	6.02	0.97	133	131	-2	111.1	166.7	55.6	168	-8	S	B	-	N	L	B	356.681	356.192	357.951	loop	interface	interface	0.487047	1	0	0	0	0	-0.0802582	-0.193635	-0.329611	-0.658297	-4.11386	-1.18703	3.83819	-7.02309	4.06308	2.55544	3.48843	0.370466	0.792175	0.037636	-1.23499	-9.47e-10
D	49	K	negativeCharge	PositiveCharge	5.05	9.74	4.69	133	146	13	111.1	168.6	57.5	101	0.4	S	B	-	+	L	L	356.681	356.192	357.951	loop	interface	interface	0.487047	1	0	0	0	1.36	-0.569164	-3.40311	-0.0836778	-0.38498	-1.63842	-1.42283	1.38918	-2.70137	-0.129054	1.35815	1.88352	0.0130906	0.594417	0.0590859	-1.74579	0
D	49	L	negativeCharge	Hydrophobic	5.05	9.71	4.66	133	131	-2	111.1	166.7	55.6	172	-7.3	S	B	-	N	L	B	356.681	356.192	357.951	loop	interface	interface	0.487047	1	0	0	0	0	-0.936078	-4.28042	-1.07561	-1.41742	-3.38205	-1.23928	3.1372	-5.71198	2.27651	2.20338	1.91745	0.159031	0.194417	0.0192986	-1.16695	9.47e-10
D	49	M	negativeCharge	Hydrophobic	5.05	5.74	0.69	133	149	16	111.1	162.9	51.8	160	-5.4	S	B	-	N	L	B	356.681	356.192	357.951	loop	interface	interface	0.487047	1	0	0	0	0	-1.02471	-5.37949	-0.169419	-0.862041	-4.74041	-1.48595	3.97573	-7.90016	1.19726	3.02641	2.69271	0.004633	-0.150076	0.0406911	-1.15894	0
D	49	P	negativeCharge	Special	5.05	6.3	1.25	133	115	-18	111.1	112.7	1.6	108	-1.9	S	P	-	N	L	P	356.681	356.192	357.951	loop	interface	interface	0.487047	1	0	0	0	0	2.52936	8.44265	5.33719	5.49155	-2.62908	-1.82648	1.10485	-6.03666	-0.765814	1.48467	8.02189	-0.562536	0.248937	0.0539627	-1.2309	9.47e-10
D	49	Q	negativeCharge	Polar	5.05	6.24	1.19	133	146	13	111.1	143.8	32.7	61	0	S	B	-	P	L	L	356.681	356.192	357.951	loop	interface	interface	0.487047	1	0	0	0	0	0.336529	2.02828	-1.04176	-1.0536	-1.76952	-0.843641	2.33379	-2.0137	-0.0689199	1.99963	5.52336	0.14403	0.830541	0.0200254	-1.20142	0
D	49	R	negativeCharge	PositiveCharge	5.05	6.34	1.29	133	174	41	111.1	173.4	62.3	96	1	S	B	-	+	L	L	356.681	356.192	357.951	loop	interface	interface	0.487047	1	0	0	0	1.36	-0.934115	-4.2235	-0.263847	-3.73498	-2.79949	-3.39321	4.68171	-2.98194	-0.0188554	4.35191	1.59937	0.543094	-0.141293	0.156084	-2.36334	9.47e-10
D	49	S	negativeCharge	Polar	5.05	5.68	0.63	133	105	-28	111.1	89	-22.1	65	-2.7	S	S	-	P	L	L	356.681	356.192	357.951	loop	interface	interface	0.487047	1	0	0	0	0	0.38085	-1.27045	-0.0043903	-8.59668	-0.0964676	-0.805822	1.05898	1.29227	-0.0271428	2.01558	2.01416	3.06797	-0.113948	0.0402771	-1.22918	0
D	49	T	negativeCharge	Polar	5.05	5.6	0.55	133	119	-14	111.1	116.1	5	85	-2.8	S	S	-	P	L	L	356.681	356.192	357.951	loop	interface	interface	0.487047	1	0	0	0	0	0.996478	2.73145	-0.0134964	-3.98153	-0.540456	-0.870083	2.24794	0.331287	0.983214	1.68966	2.48617	1.57328	-0.0706004	0.0380487	-1.21258	0
D	49	V	negativeCharge	Hydrophobic	5.05	5.61	0.56	133	117	-16	111.1	140	28.9	152	-7.7	S	S	-	N	L	B	356.681	356.192	357.951	loop	interface	interface	0.487047	1	0	0	0	0	1.25842	1.82959	-0.109375	-0.544786	-1.85527	-1.14633	1.70687	-3.11243	1.55049	1.3391	2.84317	2.33321	-0.0337786	0.0410931	-1.21616	0
D	49	W	negativeCharge	Hydrophobic	5.05	5.89	0.84	133	204	71	111.1	227.8	116.7	181	-2.6	S	B	-	N	L	B	356.681	356.192	357.951	loop	interface	interface	0.487047	1	0	0	0	0	-0.349367	-2.17415	-0.202473	-0.336696	-2.55603	-0.90606	2.26467	-4.04116	0.187163	1.83201	2.98226	-0.237601	0.219878	0.0211548	-1.18138	9.47e-10
P	50	A	Special	Hydrophobic	6.3	6	-0.3	115	89	-26	112.7	88.6	-24.1	27	-3.4	P	S	N	N	P	B	356.205	355.982	356.758	helix	interface	interface	0.157233	2	0	0	0	0	2.16531	10.3841	0.00694783	0.0962272	2.53992	0.239822	-0.593192	4.60276	0.271544	-1.9414	5.10568	0.0557939	4.69978	0	0	0
P	50	C	Special	Special	6.3	5.07	-1.23	115	121	6	112.7	108.5	-4.2	169	-4.1	P	S	N	P	P	C	356.205	355.982	356.758	helix	interface	interface	0.157233	2	0	0	0	0	3.14854	14.3092	0.089722	-0.321348	0.508842	0.129493	1.33475	2.73792	-0.0523778	1.30793	8.0918	0.418555	5.13596	0.0409086	0.0229811	9.47e-10
P	50	E	Special	negativeCharge	6.3	3.22	-3.08	115	147	32	112.7	138.4	25.7	93	1.9	P	B	N	-	P	L	356.205	355.982	356.758	helix	interface	interface	0.157233	2	0	0	0	0	3.46727	19.4766	-3.93524	-5.14675	-1.4611	5.5784	8.56524	0.783958	0.639914	5.21002	7.0097	0.782077	7.04734	-0.00464916	1.45503	9.47e-10
P	50	F	Special	Hydrophobic	6.3	3.32	-2.98	115	165	50	112.7	189.9	77.2	114	-4.4	P	B	N	N	P	B	356.205	355.982	356.758	helix	interface	interface	0.157233	2	0	0	0	0	2.92356	14.3085	0	0.122762	-3.67542	-1.73683	6.91511	-3.34512	1.41903	3.15097	9.64312	1.81491	7.63489	0	3.55e-15	0
P	50	G	Special	Special	6.3	3.29	-3.01	115	75	-40	112.7	60.1	-52.6	42	-1.2	P	S	N	N	P	B	356.205	355.982	356.758	helix	interface	interface	0.157233	2	0	0	0	0	2.52812	13.3286	0.257717	0.143555	4.95204	0.259562	-3.97465	8.02016	-0.823079	-2.01946	7.00802	-0.50555	3.30371	0.0026005	0.00771201	9.47e-10
P	50	H	Special	PositiveCharge	6.3	7.59	1.29	115	155	40	112.7	153.2	40.5	77	1.6	P	B	N	+	P	L	356.205	355.982	356.758	helix	interface	interface	0.157233	2	0	0	0	0.12	4.16529	18.9647	-0.522728	-0.434829	-1.81669	-5.07087	9.84984	0.385478	0.551041	3.66132	11.1539	1.19001	6.71194	0.00555528	-1.27768	1.29035
P	50	I	Special	Hydrophobic	6.3	6.02	-0.28	115	131	16	112.7	166.7	54	95	-6.1	P	B	N	N	P	B	356.205	355.982	356.758	helix	interface	interface	0.157233	2	0	0	0	0	2.08646	18.332	-0.605001	2.28215	-3.971	-0.57555	7.87738	-5.3252	4.92088	2.92485	9.07093	1.56328	6.80297	0.0754978	0.0912709	0.00255582
P	50	K	Special	PositiveCharge	6.3	9.74	3.44	115	146	31	112.7	168.6	55.9	103	2.3	P	B	N	+	P	L	356.205	355.982	356.758	helix	interface	interface	0.157233	2	0	0	0	1.36	2.46122	12.5791	0.0285645	-0.747219	-0.997047	-1.97793	5.15062	0.383053	0.778051	2.95231	7.09875	0.610661	6.68513	0.000851794	-0.701583	9.47e-10
P	50	L	Special	Hydrophobic	6.3	9.71	3.41	115	131	16	112.7	166.7	54	98	-5.4	P	B	N	N	P	B	356.205	355.982	356.758	helix	interface	interface	0.157233	2	0	0	0	0	3.24926	12.3397	0	0.13844	-2.78362	-0.188459	5.83609	-3.22415	1.85227	2.15991	7.15576	1.39343	6.68932	0	0	0
P	50	N	Special	Polar	6.3	5.47	-0.83	115	132	17	112.7	114.1	1.4	91	1.9	P	S	N	P	P	L	356.205	355.982	356.758	helix	interface	interface	0.157233	2	0	0	0	0	2.28756	10.1578	-1.9823	-7.55808	0.509991	0.230176	2.42329	3.02431	0.777345	0.536349	7.78422	4.4168	6.3285	0.0225667	-0.0269103	9.47e-10
P	50	Q	Special	Polar	6.3	6.24	-0.06	115	146	31	112.7	143.8	31.1	76	1.9	P	B	N	P	P	L	356.205	355.982	356.758	helix	interface	interface	0.157233	2	0	0	0	0	2.82215	14.0707	-2.55813	-1.82298	-1.79271	0.225785	6.6454	0.307452	0.128426	3.75016	8.56936	0.621223	6.54391	0.000245653	-0.00353907	9.47e-10
P	50	R	Special	PositiveCharge	6.3	6.34	0.04	115	174	59	112.7	173.4	60.7	103	2.9	P	B	N	+	P	L	356.205	355.982	356.758	helix	interface	interface	0.157233	2	0	0	0	1.36	2.59506	12.0357	0.0560972	-0.317465	-1.69608	-3.80402	5.87784	0.512159	0.0219839	3.69111	7.62216	1.17235	6.74416	0.0376062	-1.13799	9.47e-10
P	50	S	Special	Polar	6.3	5.68	-0.62	115	105	-10	112.7	89	-23.7	74	-0.8	P	S	N	P	P	L	356.205	355.982	356.758	helix	interface	interface	0.157233	2	0	0	0	0	2.03104	11.4734	-0.0108358	-6.35678	1.44394	0.217272	3.39445	5.68852	-0.0267623	0.452558	6.52686	0.121109	4.95055	0.0194104	0.00362999	9.47e-10
P	50	T	Special	Polar	6.3	5.6	-0.7	115	119	4	112.7	116.1	3.4	38	-0.9	P	S	N	P	P	L	356.205	355.982	356.758	helix	interface	interface	0.157233	2	0	0	0	0	2.39167	15.2239	-0.0315425	-4.29573	-1.01558	-0.181962	7.02695	0.496742	6.19536	1.45863	7.6303	-2.1423	5.33648	0.0572098	0.0258188	3.95e-05
P	50	V	Special	Hydrophobic	6.3	5.61	-0.69	115	117	2	112.7	140	27.3	68	-5.8	P	S	N	N	P	B	356.205	355.982	356.758	helix	interface	interface	0.157233	2	0	0	0	0	3.69899	15.3299	0.104486	0.417739	-1.69467	-0.00254341	5.13787	-1.7573	3.94613	1.2534	7.79521	-0.00769549	6.71529	0.0577728	0.0797887	-0.000268632
P	50	W	Special	Hydrophobic	6.3	5.89	-0.41	115	204	89	112.7	227.8	115.1	147	-0.7	P	B	N	N	P	B	356.205	355.982	356.758	helix	interface	interface	0.157233	2	0	0	0	0	3.89313	17.8271	-0.0362017	-0.436884	-4.41393	0.0962075	9.26757	-3.43212	1.44669	3.68372	10.1542	1.43222	7.56085	0.0352799	0.0303704	9.47e-10
P	50	Y	Special	Hydrophobic	6.3	5.66	-0.64	115	181	66	112.7	193.6	80.9	110	-0.3	P	B	N	N	P	B	356.205	355.982	356.758	helix	interface	interface	0.157233	2	0	0	0	0	3.0535	15.1482	0.0714744	0.036919	-3.03476	-1.62996	6.22986	-2.31353	0.762359	3.67511	9.47619	1.87705	7.43464	-0.00116986	-0.00138451	9.47e-10
G	51	A	Special	Hydrophobic	3.29	6	2.71	75	89	14	60.1	88.6	28.5	60	-2.2	S	S	N	N	B	B	352.862	353.134	353.996	helix	surface	surface.external	0.317308	0	0	0	0	0	0.0803847	-0.212311	-0.078531	0.00109489	-1.28764	0.00326448	1.89384	-1.90091	0.434312	0.203316	0.14354	0.375406	1.32663	0	0	0
G	51	C	Special	Special	3.29	5.07	1.78	75	121	46	60.1	108.5	48.4	159	-2.9	S	S	N	P	B	C	352.862	353.134	353.996	helix	surface	surface.external	0.317308	0	0	0	0	0	0.347906	0.841567	-1.15404	-1.10098	-3.39043	-0.12004	4.27929	-4.07825	0.16721	2.40939	3.6079	0.252144	2.23007	-0.016778	-0.0138533	9.47e-10
G	51	D	Special	negativeCharge	3.29	5.05	1.76	75	133	58	60.1	111.1	51	94	3.1	S	S	N	-	B	L	352.862	353.134	353.996	helix	surface	surface.external	0.317308	0	0	0	0	0	1.37276	7.53668	-0.790908	-0.607254	-2.62188	4.06543	5.76665	-2.98615	0.690826	0.917586	1.44844	0.860695	2.14503	0	0.79325	0
G	51	E	Special	negativeCharge	3.29	3.22	-0.07	75	147	72	60.1	138.4	78.3	98	3.1	S	B	N	-	B	L	352.862	353.134	353.996	helix	surface	surface.external	0.317308	0	0	0	0	0	0.653553	2.81184	-0.149398	0.0349382	-2.78158	2.62774	4.05703	-3.78641	0.497628	0.966905	0.343259	0.509885	2.71912	-0.0184601	0.510692	-0.000390292
G	51	F	Special	Hydrophobic	3.29	3.32	0.03	75	165	90	60.1	189.9	129.8	153	-3.2	S	B	N	N	B	B	352.862	353.134	353.996	helix	surface	surface.external	0.317308	0	0	0	0	0	0.669514	2.37918	-0.978692	-1.564	-5.60353	-1.19323	7.3707	-7.78924	2.90437	4.53046	4.05954	0.656451	2.74677	-0.0194561	-0.00284141	0.00864502
G	51	H	Special	PositiveCharge	3.29	7.59	4.3	75	155	80	60.1	153.2	93.1	98	2.8	S	B	N	+	B	L	352.862	353.134	353.996	helix	surface	surface.external	0.317308	0	0	0	0	0.12	0.717397	4.14722	-0.251192	-4.84714	-3.95455	-1.34229	7.6564	-4.60824	0.676595	5.22065	4.27563	0.863025	2.57367	4.55e-07	-0.19438	0.652712
G	51	I	Special	Hydrophobic	3.29	6.02	2.73	75	131	56	60.1	166.7	106.6	135	-4.9	S	B	N	N	B	B	352.862	353.134	353.996	helix	surface	surface.external	0.317308	0	0	0	0	0	0.44381	1.83882	-0.414606	-0.0538299	-4.97034	0.245055	6.67484	-7.51619	0.798486	2.5279	3.94845	0.63424	3.46373	-0.0199095	-0.0152777	-2.39e-06
G	51	K	Special	PositiveCharge	3.29	9.74	6.45	75	146	71	60.1	168.6	108.5	127	3.5	S	B	N	+	B	L	352.862	353.134	353.996	helix	surface	surface.external	0.317308	0	0	0	0	1.36	-0.451883	-1.34377	-0.272074	-1.34545	-3.81913	-2.34963	5.99404	-5.4185	0.876491	3.91374	0.770814	0.5623	2.78768	0	-0.256357	0
G	51	L	Special	Hydrophobic	3.29	9.71	6.42	75	131	56	60.1	166.7	106.6	138	-4.2	S	B	N	N	B	B	352.862	353.134	353.996	helix	surface	surface.external	0.317308	0	0	0	0	0	0.73047	2.47093	-0.244868	0.00216886	-3.74233	0.00894288	6.0239	-5.21919	1.1467	1.92799	1.64081	0.926807	3.03355	0	0	0
G	51	N	Special	Polar	3.29	5.47	2.18	75	132	57	60.1	114.1	54	80	3.1	S	S	N	P	B	L	352.862	353.134	353.996	helix	surface	surface.external	0.317308	0	0	0	0	0	0.774554	3.87165	-1.26452	-3.70335	-3.30749	0.158172	5.98044	-3.60211	0.815418	4.07161	4.11454	0.647473	2.4014	-0.0181095	-0.0204268	9.47e-10
G	51	P	Special	Special	3.29	6.3	3.01	75	115	40	60.1	112.7	52.6	42	1.2	S	P	N	N	B	P	352.862	353.134	353.996	helix	surface	surface.external	0.317308	0	0	0	0	0	-0.342978	-1.44785	-0.349092	0.025006	-2.5533	0.0385882	1.35439	-4.3441	6.84429	1.51556	-4.58186	0.602655	-2.7232	0	0	0
G	51	Q	Special	Polar	3.29	6.24	2.95	75	146	71	60.1	143.8	83.7	87	3.1	S	B	N	P	B	L	352.862	353.134	353.996	helix	surface	surface.external	0.317308	0	0	0	0	0	-0.0333591	-0.137133	-0.827384	-8.118	-3.8341	-0.110392	6.54036	-4.98334	0.626189	7.27766	2.82515	0.466714	2.90254	0	0	0
G	51	R	Special	PositiveCharge	3.29	6.34	3.05	75	174	99	60.1	173.4	113.3	125	4.1	S	B	N	+	B	L	352.862	353.134	353.996	helix	surface	surface.external	0.317308	0	0	0	0	1.36	-0.137008	-0.216233	-0.229316	-3.52508	-3.68731	-3.99513	6.5921	-4.56844	0.487023	6.6722	1.5382	1.0554	2.56637	4.55e-07	-0.555883	9.47e-10
G	51	S	Special	Polar	3.29	5.68	2.39	75	105	30	60.1	89	28.9	56	0.4	S	S	N	P	B	L	352.862	353.134	353.996	helix	surface	surface.external	0.317308	0	0	0	0	0	0.718494	3.4713	-0.117854	0.00216886	-1.58542	0.00333904	3.3129	-1.16138	0.513497	0.965905	1.17831	0.359829	1.61741	0	0	0
G	51	T	Special	Polar	3.29	5.6	2.31	75	119	44	60.1	116.1	56	59	0.3	S	S	N	P	B	L	352.862	353.134	353.996	helix	surface	surface.external	0.317308	0	0	0	0	0	0.770231	3.42083	-0.239524	-0.127333	-2.56025	0.275977	4.46189	-3.14895	0.746149	1.11696	2.08635	0.862419	2.3679	-0.0178951	-0.0349713	9.47e-10
G	51	V	Special	Hydrophobic	3.29	5.61	2.32	75	117	42	60.1	140	79.9	109	-4.6	S	S	N	N	B	B	352.862	353.134	353.996	helix	surface	surface.external	0.317308	0	0	0	0	0	0.733829	3.00057	-0.400745	-0.257622	-3.95568	-0.217078	6.78502	-5.46895	1.18169	1.87796	2.72556	0.730411	3.19194	0	0	0
G	51	W	Special	Hydrophobic	3.29	5.89	2.6	75	204	129	60.1	227.8	167.7	184	0.5	S	B	N	N	B	B	352.862	353.134	353.996	helix	surface	surface.external	0.317308	0	0	0	0	0	0.634883	3.03545	-0.372973	0.0422308	-5.94051	0.276561	8.19811	-8.03348	0.943051	3.28083	3.81558	0.859525	2.70869	4.55e-07	-0.0334635	9.47e-10
G	51	Y	Special	Hydrophobic	3.29	5.66	2.37	75	181	106	60.1	193.6	133.5	147	0.9	S	B	N	N	B	B	352.862	353.134	353.996	helix	surface	surface.external	0.317308	0	0	0	0	0	0.611239	2.67065	-0.307339	0.0225655	-4.61941	-1.26316	6.41064	-6.31533	0.649537	3.81435	3.6272	0.676076	2.39692	-0.0177906	-0.00669624	9.47e-10
K	52	A	PositiveCharge	Hydrophobic	9.74	6	-3.74	146	89	-57	168.6	88.6	-80	106	-5.7	B	S	+	N	L	B	354.455	355.598	357.702	helix	interface	interface	0.0932203	3	0	0	0	-1.36	2.4926	9.96607	8.01157	7.98946	8.83891	10.5337	-22.9159	9.61035	-0.304852	-10.9844	-2.20141	-0.106753	-2.96182	-0.125665	1.62111	0
K	52	C	PositiveCharge	Special	9.74	5.07	-4.67	146	121	-25	168.6	108.5	-60.1	202	-6.4	B	S	+	P	L	C	354.455	355.598	357.702	helix	interface	interface	0.0932203	3	0	0	0	-1.36	3.29206	12.1249	7.92132	7.66116	6.27597	9.27999	-19.945	7.37176	-1.67359	-7.58664	0.758382	0.520529	-1.75901	-0.114228	1.65529	9.47e-10
K	52	D	PositiveCharge	negativeCharge	9.74	5.05	-4.69	146	133	-13	168.6	111.1	-57.5	101	-0.4	B	S	+	-	L	L	354.455	355.598	357.702	helix	interface	interface	0.0932203	3	0	0	0	-1.36	5.33452	22.7373	10.954	10.2404	6.43089	12.3311	-15.6764	7.57597	-0.555277	-11.092	-0.289966	0.403781	-1.42537	-0.204955	2.61971	9.47e-10
K	52	F	PositiveCharge	Hydrophobic	9.74	3.32	-6.42	146	165	19	168.6	189.9	21.3	102	-6.7	B	B	+	N	L	B	354.455	355.598	357.702	helix	interface	interface	0.0932203	3	0	0	0	-1.36	2.07986	6.96164	8.35683	8.31659	1.60057	7.49527	-14.6538	-0.325703	-1.05871	-5.96441	1.57154	0.0698659	0.555506	-0.12589	1.67944	9.47e-10
K	52	G	PositiveCharge	Special	9.74	3.29	-6.45	146	75	-71	168.6	60.1	-108.5	127	-3.5	B	S	+	N	L	B	354.455	355.598	357.702	helix	interface	interface	0.0932203	3	0	0	0	-1.36	3.54442	13.4566	7.71515	7.74529	11.1891	9.09348	-24.7435	13.6843	-0.468022	-10.678	-1.49664	-0.0845594	-4.62414	-0.117414	1.61741	9.47e-10
K	52	H	PositiveCharge	PositiveCharge	9.74	7.59	-2.15	146	155	9	168.6	153.2	-15.4	32	-0.7	B	B	+	+	L	L	354.455	355.598	357.702	helix	interface	interface	0.0932203	3	0	0	0	-1.24	2.33056	6.91121	3.68838	3.63981	3.51326	3.3195	-11.2008	4.43849	-0.518283	-4.87117	3.68624	-0.0524703	-0.20183	-0.120246	0.122575	1.26591
K	52	I	PositiveCharge	Hydrophobic	9.74	6.02	-3.72	146	131	-15	168.6	166.7	-1.9	102	-8.4	B	B	+	N	L	B	354.455	355.598	357.702	helix	interface	interface	0.0932203	3	0	0	0	-1.36	2.0729	6.71429	8.72807	8.71997	0.999577	9.58604	-14.4644	-2.83135	-1.45173	-6.08351	1.29202	0.647853	1.00475	-0.0971001	1.66886	9.47e-10
K	52	L	PositiveCharge	Hydrophobic	9.74	9.71	-0.03	146	131	-15	168.6	166.7	-1.9	107	-7.7	B	B	+	N	L	B	354.455	355.598	357.702	helix	interface	interface	0.0932203	3	0	0	0	-1.36	1.90516	6.10397	7.85801	7.81754	1.51592	9.31958	-14.656	-1.73948	-0.502438	-5.89451	0.822839	0.021822	0.6067	-0.11991	1.66056	9.47e-10
K	52	P	PositiveCharge	Special	9.74	6.3	-3.44	146	115	-31	168.6	112.7	-55.9	103	-2.3	B	P	+	N	L	P	354.455	355.598	357.702	helix	interface	interface	0.0932203	3	0	0	0	-1.36	0.736933	0.11747	8.16783	8.025	6.99964	9.5011	-22.9015	6.69326	-0.426235	-9.65307	-7.67095	-0.107334	-10.5015	-0.120771	1.61052	0
K	52	Q	PositiveCharge	Polar	9.74	6.24	-3.5	146	146	0	168.6	143.8	-24.8	53	-0.4	B	B	+	P	L	L	354.455	355.598	357.702	helix	interface	interface	0.0932203	3	0	0	0	-1.36	3.2727	11.2192	6.24577	6.45514	2.37651	9.60374	-13.6343	3.39275	-0.238479	-4.83836	0.179639	0.237267	-0.694469	-0.134905	1.57446	9.47e-10
K	52	R	PositiveCharge	PositiveCharge	9.74	6.34	-3.4	146	174	28	168.6	173.4	4.8	26	0.6	B	B	+	+	L	L	354.455	355.598	357.702	helix	interface	interface	0.0932203	3	0	0	0	0	0.200917	0.303382	3.74095	3.629	-2.54143	-5.32272	-2.33478	0.535173	0.740386	0.922711	0.945794	0.394098	-0.148037	0.154821	-0.560611	0
K	52	S	PositiveCharge	Polar	9.74	5.68	-4.06	146	105	-41	168.6	89	-79.6	121	-3.1	B	S	+	P	L	L	354.455	355.598	357.702	helix	interface	interface	0.0932203	3	0	0	0	-1.36	3.04615	11.2855	8.08352	1.65471	7.30602	9.16902	-17.9846	10.5059	0.0885479	-8.40198	-0.621032	-0.0695063	-1.73279	-0.120097	1.67499	0
K	52	T	PositiveCharge	Polar	9.74	5.6	-4.14	146	119	-27	168.6	116.1	-52.5	78	-3.2	B	S	+	P	L	L	354.455	355.598	357.702	helix	interface	interface	0.0932203	3	0	0	0	-1.36	2.67059	9.66076	8.34955	1.8946	5.25065	9.33582	-14.3325	6.92223	-1.21552	-7.90896	-0.132745	-0.00779104	-0.438806	-0.0968092	1.60221	9.47e-10
K	52	V	PositiveCharge	Hydrophobic	9.74	5.61	-4.13	146	117	-29	168.6	140	-28.6	97	-8.1	B	S	+	N	L	B	354.455	355.598	357.702	helix	interface	interface	0.0932203	3	0	0	0	-1.36	2.29289	7.88215	8.68605	8.67252	3.27519	9.26073	-16.386	1.2656	-1.45654	-8.45959	0.852554	0.608956	0.908883	-0.0962716	1.65899	9.47e-10
K	52	W	PositiveCharge	Hydrophobic	9.74	5.89	-3.85	146	204	58	168.6	227.8	59.2	110	-3	B	B	+	N	L	B	354.455	355.598	357.702	helix	interface	interface	0.0932203	3	0	0	0	-1.36	2.68911	10.9709	7.1835	4.97731	-0.367898	10.6102	-10.2974	-2.11726	0.990674	-4.46814	2.47954	0.542199	0.370703	-0.201939	1.64006	9.47e-10
K	52	Y	PositiveCharge	Hydrophobic	9.74	5.66	-4.08	146	181	35	168.6	193.6	25	85	-2.6	B	B	+	N	L	B	354.455	355.598	357.702	helix	interface	interface	0.0932203	3	0	0	0	-1.36	2.34632	7.77555	8.12609	8.17051	2.32802	6.85389	-15.5486	0.67267	-0.213335	-5.59268	1.37	0.0551581	0.332718	-0.120839	1.67464	0
F	53	A	Hydrophobic	Hydrophobic	3.32	6	2.68	165	89	-76	189.9	88.6	-101.3	113	1	B	S	N	N	B	B	355.725	357.344	359.803	loop	interface	interface	0.0583333	7	0	0	0	0	3.92956	20.8289	0.708269	0.865398	12.8282	0.739546	-10.3851	20.2001	-0.409824	-3.75873	0.243819	-0.202723	-3.88892	0	0	0
F	53	E	Hydrophobic	negativeCharge	3.32	3.22	-0.1	165	147	-18	189.9	138.4	-51.5	140	6.3	B	B	N	-	B	L	355.725	357.344	359.803	loop	interface	interface	0.0583333	7	0	0	0	0	5.68735	26.5858	-0.119101	-0.108835	5.99102	-1.42018	6.53146	12.2284	0.0523809	1.46404	0.63025	0.581166	-1.28007	-0.22701	0.982134	-9.47e-10
F	53	G	Hydrophobic	Special	3.32	3.29	-0.03	165	75	-90	189.9	60.1	-129.8	153	3.2	B	S	N	N	B	B	355.725	357.344	359.803	loop	interface	interface	0.0583333	7	0	0	0	0	4.42441	21.1647	0.737468	1.13958	15.3746	0.690801	-13.3532	24.2239	-0.747612	-3.74939	-2.45885	-0.697859	-5.89803	0.00351721	0.00187729	9.47e-10
F	53	H	Hydrophobic	PositiveCharge	3.32	7.59	4.27	165	155	-10	189.9	153.2	-36.7	100	6	B	B	N	+	B	L	355.725	357.344	359.803	loop	interface	interface	0.0583333	7	0	0	0	0.12	3.42099	17.0026	0.407946	0.567069	3.03613	-0.146156	4.61339	8.42288	-0.326101	0.469889	-0.695708	-0.00559902	-1.08963	0	0	0.658846
F	53	I	Hydrophobic	Hydrophobic	3.32	6.02	2.7	165	131	-34	189.9	166.7	-23.2	21	-1.7	B	B	N	N	B	B	355.725	357.344	359.803	loop	interface	interface	0.0583333	7	0	0	0	0	3.10248	14.895	0.54273	0.481429	5.08254	0.491145	-4.28491	5.3786	6.03787	1.00315	-0.385637	0.548108	-0.910912	0	0	0
F	53	K	Hydrophobic	PositiveCharge	3.32	9.74	6.42	165	146	-19	189.9	168.6	-21.3	102	6.7	B	B	N	+	B	L	355.725	357.344	359.803	loop	interface	interface	0.0583333	7	0	0	0	1.35	3.47068	16.3537	-2.4305	-4.14962	2.54827	-4.47048	15.6709	7.12665	-2.37723	5.92851	-0.481074	-0.0908222	-0.730204	0.276566	-1.19749	9.47e-10
F	53	L	Hydrophobic	Hydrophobic	3.32	9.71	6.39	165	131	-34	189.9	166.7	-23.2	22	-1	B	B	N	N	B	B	355.725	357.344	359.803	loop	interface	interface	0.0583333	7	0	0	0	0	1.38114	6.43171	0.541642	0.627402	4.68549	0.397522	-5.18038	4.5168	-0.180353	0.997042	-0.112334	0.138879	-0.896779	0	0	0
F	53	R	Hydrophobic	PositiveCharge	3.32	6.34	3.02	165	174	9	189.9	173.4	-16.5	97	7.3	B	B	N	+	B	L	355.725	357.344	359.803	loop	interface	interface	0.0583333	7	0	0	0	1.36	5.21177	23.3616	-0.957848	-2.9065	-0.307151	-4.11539	15.7477	8.89791	-1.93587	5.73746	2.69592	1.65257	-1.05796	0.51352	-1.66074	9.47e-10
F	53	S	Hydrophobic	Polar	3.32	5.68	2.36	165	105	-60	189.9	89	-100.9	155	3.6	B	S	N	P	B	L	355.725	357.344	359.803	loop	interface	interface	0.0583333	7	0	0	0	0	3.90821	18.8504	-4.15077	-3.7388	11.4301	0.714396	-7.22749	21.154	-0.257081	-1.11046	1.55773	0.478819	-2.6857	0	0	0
F	53	T	Hydrophobic	Polar	3.32	5.6	2.28	165	119	-46	189.9	116.1	-73.8	103	3.5	B	S	N	P	B	L	355.725	357.344	359.803	loop	interface	interface	0.0583333	7	0	0	0	0	2.78704	12.8441	-4.25045	-3.73038	9.10064	0.420586	-4.49872	16.367	-0.353529	-1.15326	0.609779	0.332392	-1.74555	0	0	0
F	53	V	Hydrophobic	Hydrophobic	3.32	5.61	2.29	165	117	-48	189.9	140	-49.9	50	-1.4	B	S	N	N	B	B	355.725	357.344	359.803	loop	interface	interface	0.0583333	7	0	0	0	0	4.31802	19.5916	0.600485	0.857223	8.25832	0.47077	-6.38025	11.8857	4.04235	-1.62339	-0.293001	1.77144	-1.40582	0.000828917	0.0010799	9.47e-10
F	53	W	Hydrophobic	Hydrophobic	3.32	5.89	2.57	165	204	39	189.9	227.8	37.9	40	3.7	B	B	N	N	B	B	355.725	357.344	359.803	loop	interface	interface	0.0583333	7	0	0	0	0	8.25515	46.167	4.41035	2.70648	-1.48157	3.68042	-0.096865	-1.55495	33.4054	-1.76514	5.07013	1.2803	1.12352	-0.0720728	0.584556	-1.63e-05
F	53	Y	Hydrophobic	Hydrophobic	3.32	5.66	2.34	165	181	16	189.9	193.6	3.7	22	4.1	B	B	N	N	B	B	355.725	357.344	359.803	loop	interface	interface	0.0583333	7	0	0	0	0	5.63904	26.4637	-0.194473	-0.990174	-1.06408	-0.285269	6.56782	1.48993	19.8271	0.57527	0.101513	0.436055	0.656085	0	0	0
T	54	A	Polar	Hydrophobic	5.6	6	0.4	119	89	-30	116.1	88.6	-27.5	58	-2.5	S	S	P	N	L	B	353.712	353.519	354.655	loop	interface	interface	0.0581395	4	0	0	0	0	-2.11252	-9.08672	0.553158	0.501592	4.27151	0.0601773	-8.31074	4.40971	-1.49296	-2.82437	0.990513	-7.22673	-1.54287	0	0	-0.0185673
T	54	C	Polar	Special	5.6	5.07	-0.53	119	121	2	116.1	108.5	-7.6	149	-3.2	S	S	P	P	L	C	353.712	353.519	354.655	loop	interface	interface	0.0581395	4	0	0	0	0	-1.24118	-5.74641	0.369701	0.325303	0.607989	-0.0287458	-4.86009	0.53903	-0.664939	1.23585	0.93825	-4.21009	-0.750299	0	0	0.00133427
T	54	D	Polar	negativeCharge	5.6	5.05	-0.55	119	133	14	116.1	111.1	-5	85	2.8	S	S	P	-	L	L	353.712	353.519	354.655	loop	interface	interface	0.0581395	4	0	0	0	0	4.19864	21.2194	-0.207446	1.00284	-0.502481	6.95746	8.36508	0.735239	8.1332	-0.125342	1.69596	-6.09279	0.0290116	-0.041611	1.29459	0.00473582
T	54	E	Polar	negativeCharge	5.6	3.22	-2.38	119	147	28	116.1	138.4	22.3	65	2.8	S	B	P	-	L	L	353.712	353.519	354.655	loop	interface	interface	0.0581395	4	0	0	0	0	2.84738	15.5671	0.542383	0.236426	-2.84874	3.93726	11.847	-2.72489	3.91505	3.28621	1.89171	-5.57574	-0.649002	-0.114683	1.17353	0.00165779
T	54	G	Polar	Special	5.6	3.29	-2.31	119	75	-44	116.1	60.1	-56	59	-0.3	S	S	P	N	L	B	353.712	353.519	354.655	loop	interface	interface	0.0581395	4	0	0	0	0	-0.878442	-5.18457	0.673579	0.501592	7.3618	0.0842574	-11.8097	9.50174	-2.18216	-2.9245	1.36345	-7.73617	-2.74124	0	0	-0.0185104
T	54	I	Polar	Hydrophobic	5.6	6.02	0.42	119	131	12	116.1	166.7	50.6	89	-5.2	S	B	P	N	L	B	353.712	353.519	354.655	loop	interface	interface	0.0581395	4	0	0	0	0	-0.278787	-1.11814	0.494464	0.212537	-4.82197	-0.155605	2.26485	-10.8083	1.7424	2.77733	0.720066	6.42616	1.19323	0.0197434	0.018448	-0.00831175
T	54	L	Polar	Hydrophobic	5.6	9.71	4.11	119	131	12	116.1	166.7	50.6	92	-4.5	S	B	P	N	L	B	353.712	353.519	354.655	loop	interface	interface	0.0581395	4	0	0	0	0	0.852351	2.13073	0.553158	0.501592	-4.16088	-0.255911	1.45966	-9.90472	5.52524	2.41026	1.9063	4.11454	1.92558	0	0	-0.0185031
T	54	N	Polar	Polar	5.6	5.47	-0.13	119	132	13	116.1	114.1	-2	65	2.8	S	S	P	P	L	L	353.712	353.519	354.655	loop	interface	interface	0.0581395	4	0	0	0	0	1.67899	9.94925	0.759208	0.681978	-1.43047	-0.0382108	3.34194	-0.24074	7.49661	0.720933	1.47297	-2.79327	1.58546	-4.72e-07	5.87e-07	-0.0217111
T	54	P	Polar	Special	5.6	6.3	0.7	119	115	-4	116.1	112.7	-3.4	38	0.9	S	P	P	N	L	P	353.712	353.519	354.655	loop	interface	interface	0.0581395	4	0	0	0	0	-0.564321	-2.48288	0.513141	0.476857	0.844683	0.0586366	-8.79293	-2.61859	14.2343	-1.6247	0.843062	-6.39876	-4.90549	4.63e-07	-5.96e-07	-0.0186184
T	54	Q	Polar	Polar	5.6	6.24	0.64	119	146	27	116.1	143.8	27.7	42	2.8	S	B	P	P	L	L	353.712	353.519	354.655	loop	interface	interface	0.0581395	4	0	0	0	0	-0.141426	0.347572	-2.78118	-4.606	-3.95182	-0.107973	6.30706	-3.23599	6.23967	6.93018	1.91554	-6.42799	-0.488702	0.020135	0.0238268	0.0221031
T	54	R	Polar	PositiveCharge	5.6	6.34	0.74	119	174	55	116.1	173.4	57.3	71	3.8	S	B	P	+	L	L	353.712	353.519	354.655	loop	interface	interface	0.0581395	4	0	0	0	1.36	-0.95483	-4.34002	1.12472	-2.55806	-6.3313	-8.97637	8.77676	-5.57235	0.385853	8.15136	2.68589	-0.535212	1.20322	1.59e-05	-1.46985	-0.0214888
T	54	S	Polar	Polar	5.6	5.68	0.08	119	105	-14	116.1	89	-27.1	58	0.1	S	S	P	P	L	L	353.712	353.519	354.655	loop	interface	interface	0.0581395	4	0	0	0	0	-1.3863	-3.69666	-0.529232	-0.542583	3.11355	0.00727133	-3.50367	6.07855	-0.949283	-0.515664	0.445421	-7.29154	-1.63729	0	0	-0.00948287
T	54	V	Polar	Hydrophobic	5.6	5.61	0.01	119	117	-2	116.1	140	23.9	69	-4.9	S	S	P	N	L	B	353.712	353.519	354.655	loop	interface	interface	0.0581395	4	0	0	0	0	-0.645965	-1.11051	0.563941	0.512455	-1.9563	0.0357036	-1.47156	-5.96301	0.032381	-0.448235	0.589411	7.0133	0.959641	-4.63e-07	5.96e-07	-0.0186032
T	54	W	Polar	Hydrophobic	5.6	5.89	0.29	119	204	85	116.1	227.8	111.7	128	0.2	S	B	P	N	L	B	353.712	353.519	354.655	loop	interface	interface	0.0581395	4	0	0	0	0	10.7636	36.5109	1.34871	5.34334	-10.5103	-0.53633	11.6438	-14.3146	24.66	1.47717	4.53757	12.8895	2.56223	-0.00125476	-0.0586648	0.0319163
E	55	A	negativeCharge	Hydrophobic	3.22	6	2.78	147	89	-58	138.4	88.6	-49.8	107	-5.3	B	S	-	N	L	B	350.064	349.43	351.403	loop	interface	interface	0.26009	2	0	0	0	-1.86	-1.02715	-3.93207	-0.877891	6.18924	2.32236	-1.16288	-4.61189	2.94865	-2.10256	-6.10385	0.738409	-0.716185	-0.147692	4.63e-07	-0.536542	-0.0189367
E	55	C	negativeCharge	Special	3.22	5.07	1.85	147	121	-26	138.4	108.5	-29.9	170	-6	B	S	-	P	L	C	350.064	349.43	351.403	loop	interface	interface	0.26009	2	0	0	0	-1.86	-1.06204	-3.25345	0.0145617	3.12625	-0.339455	-1.03372	-3.09593	0.315478	-0.561975	-1.45556	0.131704	0.133751	-0.0461565	4.63e-07	-0.525995	0.0374347
E	55	F	negativeCharge	Hydrophobic	3.22	3.32	0.1	147	165	18	138.4	189.9	51.5	140	-6.3	B	B	-	N	L	B	350.064	349.43	351.403	loop	interface	interface	0.26009	2	0	0	0	-1.86	1.22586	7.10359	0.000336844	3.30811	-7.64688	-1.05566	5.12639	-11.0837	1.30608	0.415032	2.34063	14.8487	0.339402	4.63e-07	-0.525995	0.0705652
E	55	G	negativeCharge	Special	3.22	3.29	0.07	147	75	-72	138.4	60.1	-78.3	98	-3.1	B	S	-	N	L	B	350.064	349.43	351.403	loop	interface	interface	0.26009	2	0	0	0	-1.86	-4.38646	-21.4178	0.0163681	6.80975	5.67606	-1.07503	-9.04327	7.8486	-12.1046	-7.25414	-7.45854	-4.25339	-0.817468	4.63e-07	-0.537801	-0.0417603
E	55	H	negativeCharge	PositiveCharge	3.22	7.59	4.37	147	155	8	138.4	153.2	14.8	40	-0.3	B	B	-	+	L	L	350.064	349.43	351.403	loop	interface	interface	0.26009	2	0	0	0	-1.74	2.22692	11.9806	0.0111581	4.25274	-4.63066	-1.07367	7.29629	-4.10444	1.20672	-0.781555	1.51379	8.35773	0.0517674	4.63e-07	-0.525995	0.458459
E	55	I	negativeCharge	Hydrophobic	3.22	6.02	2.8	147	131	-16	138.4	166.7	28.3	134	-8	B	B	-	N	L	B	350.064	349.43	351.403	loop	interface	interface	0.26009	2	0	0	0	-1.86	0.435492	2.4966	-2.48e-05	9.02109	-0.702477	-1.08218	-2.7668	-3.12866	2.98335	-4.51817	0.327645	2.88678	0.0939472	4.63e-07	-0.525995	0.00204098
E	55	K	negativeCharge	PositiveCharge	3.22	9.74	6.52	147	146	-1	138.4	168.6	30.2	56	0.4	B	B	-	+	L	L	350.064	349.43	351.403	loop	interface	interface	0.26009	2	0	0	0	-0.5	-0.184251	-0.900767	-2.46e-05	3.98934	-0.716323	-1.67115	-1.90225	-2.06441	0.549898	1.18317	0.215532	0.350135	0.135085	4.63e-07	-0.818912	-0.015768
E	55	L	negativeCharge	Hydrophobic	3.22	9.71	6.49	147	131	-16	138.4	166.7	28.3	138	-7.3	B	B	-	N	L	B	350.064	349.43	351.403	loop	interface	interface	0.26009	2	0	0	0	-1.86	0.491592	1.97573	-0.0320359	5.92865	-2.92548	-1.0577	0.114847	-5.62831	3.89367	-1.89224	0.961009	3.08797	0.426003	4.63e-07	-0.525995	0.0513254
E	55	M	negativeCharge	Hydrophobic	3.22	5.74	2.52	147	149	2	138.4	162.9	24.5	126	-5.4	B	B	-	N	L	B	350.064	349.43	351.403	loop	interface	interface	0.26009	2	0	0	0	-1.86	-0.613403	-2.84695	-2.48e-05	8.45065	-2.91017	-1.07002	-1.12984	-5.76749	1.53211	-2.40471	0.543345	0.401339	-0.00607704	4.63e-07	-0.525995	0.0338554
E	55	N	negativeCharge	Polar	3.22	5.47	2.25	147	132	-15	138.4	114.1	-24.3	42	0	B	S	-	P	L	L	350.064	349.43	351.403	loop	interface	interface	0.26009	2	0	0	0	-1.86	1.4756	3.74179	-2.48e-05	4.00474	-0.429324	-1.06976	0.752415	1.43365	1.26581	-3.78817	1.1558	0.956961	0.0445532	4.63e-07	-0.525995	-0.0143105
E	55	P	negativeCharge	Special	3.22	6.3	3.08	147	115	-32	138.4	112.7	-25.7	93	-1.9	B	P	-	N	L	P	350.064	349.43	351.403	loop	interface	interface	0.26009	2	0	0	0	-1.86	4.36523	24.5269	0.0133152	6.88506	-1.9519	-1.00414	-3.40546	-4.51024	32.2635	-4.35383	3.67263	-2.50412	1.2941	4.63e-07	-0.525995	-0.051979
E	55	Q	negativeCharge	Polar	3.22	6.24	3.02	147	146	-1	138.4	143.8	5.4	29	0	B	B	-	P	L	L	350.064	349.43	351.403	loop	interface	interface	0.26009	2	0	0	0	-1.86	-0.21812	-0.455558	-0.601484	3.68399	-0.885263	-1.08042	-0.571468	-0.631579	0.370791	-0.767713	0.231706	0.342624	0.328483	4.63e-07	-0.525995	-0.0207467
E	55	R	negativeCharge	PositiveCharge	3.22	6.34	3.12	147	174	27	138.4	173.4	35	54	1	B	B	-	+	L	L	350.064	349.43	351.403	loop	interface	interface	0.26009	2	0	0	0	-0.5	-0.965782	-0.234587	-3.66596	2.82886	-4.03994	-3.19131	3.41162	-3.67763	3.25526	3.21317	1.32804	1.81871	1.36577	0.000303435	-1.49547	-0.0202417
E	55	S	negativeCharge	Polar	3.22	5.68	2.46	147	105	-42	138.4	89	-49.4	80	-2.7	B	S	-	P	L	L	350.064	349.43	351.403	loop	interface	interface	0.26009	2	0	0	0	-1.86	0.106554	1.48688	-2.27804	3.35968	1.1169	-1.04387	-3.47564	3.44736	-1.76638	-2.90015	1.03151	4.61121	0.815491	4.63e-07	-0.525995	-0.0897088
E	55	T	negativeCharge	Polar	3.22	5.6	2.38	147	119	-28	138.4	116.1	-22.3	65	-2.8	B	S	-	P	L	L	350.064	349.43	351.403	loop	interface	interface	0.26009	2	0	0	0	-1.86	1.2124	5.98691	0.0311485	4.16596	0.242676	-1.01537	-0.512509	1.44729	2.63689	-3.38298	0.518259	2.34902	-0.131213	4.63e-07	-0.525995	0.0325219
E	55	V	negativeCharge	Hydrophobic	3.22	5.61	2.39	147	117	-30	138.4	140	1.6	121	-7.7	B	S	-	N	L	B	350.064	349.43	351.403	loop	interface	interface	0.26009	2	0	0	0	-1.86	0.893746	4.37245	-2.48e-05	3.62793	-1.39366	-1.00624	-0.725314	-2.71581	5.51218	-2.40683	0.690599	3.23326	0.0145728	4.63e-07	-0.525995	0.082353
E	55	Y	negativeCharge	Hydrophobic	3.22	5.66	2.44	147	181	34	138.4	193.6	55.2	122	-2.2	B	B	-	N	L	B	350.064	349.43	351.403	loop	interface	interface	0.26009	2	0	0	0	-1.86	3.07639	15.8017	0.0168195	4.54345	-6.08404	-1.04874	4.46494	-7.87261	0.57284	-0.393158	2.24388	19.8561	0.524769	4.63e-07	-0.525995	0.0282178
P	56	A	Special	Hydrophobic	6.3	6	-0.3	115	89	-26	112.7	88.6	-24.1	27	-3.4	P	S	N	N	P	B	350.062	350.319	351.593	loop	interface	interface	0.0754717	1	0	0	0	1.76	1.46425	7.48897	0.0881805	0	3.1463	0	-1.24793	5.39071	-1.3366	-1.34974	3.22276	-0.424714	5.88641	0	0	0
P	56	C	Special	Special	6.3	5.07	-1.23	115	121	6	112.7	108.5	-4.2	169	-4.1	P	S	N	P	P	C	350.062	350.319	351.593	loop	interface	interface	0.0754717	1	0	0	0	-0.15	2.88526	14.8631	0.0198587	0	0.160006	0	1.44255	2.38617	-0.881296	2.05648	9.37516	0.30419	7.53882	0	0	0
P	56	D	Special	negativeCharge	6.3	5.05	-1.25	115	133	18	112.7	111.1	-1.6	108	1.9	P	S	N	-	P	L	350.062	350.319	351.593	loop	interface	interface	0.0754717	1	0	0	0	-1.09	4.49488	22.0487	-1.2181	-1.18724	-0.9975	-1.98953	18.4975	2.54269	-1.39657	1.14789	3.73659	1.86558	8.35957	4.63e-07	-1.085	2.1324
P	56	E	Special	negativeCharge	6.3	3.22	-3.08	115	147	32	112.7	138.4	25.7	93	1.9	P	B	N	-	P	L	350.062	350.319	351.593	loop	interface	interface	0.0754717	1	0	0	0	-1.09	4.72469	23.7592	-4.59525	-4.44558	-4.03454	-2.40117	22.1353	-1.49756	5.22346	5.5869	6.27833	0.429632	10.1758	4.63e-07	-1.06603	2.14564
P	56	F	Special	Hydrophobic	6.3	3.32	-2.98	115	165	50	112.7	189.9	77.2	114	-4.4	P	B	N	N	P	B	350.062	350.319	351.593	loop	interface	interface	0.0754717	1	0	0	0	31.31	7.27363	35.3179	-0.254869	0	-8.44333	0	12.7697	-10.5286	26.2373	2.40095	9.12802	3.88742	11.6172	0	0	0.12135
P	56	G	Special	Special	6.3	3.29	-3.01	115	75	-40	112.7	60.1	-52.6	42	-1.2	P	S	N	N	P	B	350.062	350.319	351.593	loop	interface	interface	0.0754717	1	0	0	0	-0.02	1.50175	7.97111	0.0914797	0	6.26195	0	-5.67944	9.70121	-1.73654	-1.37535	1.44849	-0.740687	1.80202	0	0	0
P	56	H	Special	PositiveCharge	6.3	7.59	1.29	115	155	40	112.7	153.2	40.5	77	1.6	P	B	N	+	P	L	350.062	350.319	351.593	loop	interface	interface	0.0754717	1	0	0	0	-0.02	5.05626	25.0266	-1.88057	-1.66581	-6.20709	-3.79e-06	16.9692	-3.48982	6.5332	2.86851	7.70232	3.42452	10.607	-4.63e-07	5.96e-07	0.772168
P	56	K	Special	PositiveCharge	6.3	9.74	3.44	115	146	31	112.7	168.6	55.9	103	2.3	P	B	N	+	P	L	350.062	350.319	351.593	loop	interface	interface	0.0754717	1	0	0	0	0.27	3.54324	16.1134	-8.5082	-8.13315	-7.21459	-0.681001	23.4285	-6.3315	-0.0893904	8.1604	10.1739	5.54862	11.6879	-4.63e-07	-0.333964	0.0937012
P	56	L	Special	Hydrophobic	6.3	9.71	3.41	115	131	16	112.7	166.7	54	98	-5.4	P	B	N	N	P	B	350.062	350.319	351.593	loop	interface	interface	0.0754717	1	0	0	0	14.23	2.62457	14.3446	-0.319031	1.47e-05	-5.70831	-3.79e-06	8.74314	-8.7312	0.059016	3.45182	8.54838	8.2673	11.9123	-4.63e-07	5.96e-07	0.0334837
P	56	M	Special	Hydrophobic	6.3	5.74	-0.56	115	149	34	112.7	162.9	50.2	87	-3.5	P	B	N	N	P	B	350.062	350.319	351.593	loop	interface	interface	0.0754717	1	0	0	0	2.56	0.945023	3.9957	-0.422384	1.47e-05	-7.32073	-3.79e-06	9.4044	-9.42251	-0.640876	5.13119	6.74758	0.459027	12.186	-4.63e-07	5.96e-07	0.0599906
P	56	N	Special	Polar	6.3	5.47	-0.83	115	132	17	112.7	114.1	1.4	91	1.9	P	S	N	P	P	L	350.062	350.319	351.593	loop	interface	interface	0.0754717	1	0	0	0	-0.03	2.92364	13.236	-2.49794	-2.24691	-1.84912	0	8.57549	1.93943	1.59543	2.09959	3.15684	2.46323	8.8932	0	0	3.55e-15
P	56	Q	Special	Polar	6.3	6.24	-0.06	115	146	31	112.7	143.8	31.1	76	1.9	P	B	N	P	P	L	350.062	350.319	351.593	loop	interface	interface	0.0754717	1	0	0	0	-0.03	3.65898	17.8733	-2.5884	-2.29814	-5.26542	-3.79e-06	12.6558	-2.57513	-0.0229823	6.26556	6.51306	5.16498	10.9827	-4.63e-07	5.96e-07	0.02402
P	56	R	Special	PositiveCharge	6.3	6.34	0.04	115	174	59	112.7	173.4	60.7	103	2.9	P	B	N	+	P	L	350.062	350.319	351.593	loop	interface	interface	0.0754717	1	0	0	0	0.27	5.18413	25.7853	-2.9287	-1.9821	-10.6817	-0.137911	25.14	-5.31507	6.07298	7.89867	6.29811	1.87235	12.5932	0.0452135	-0.585543	0.08897
P	56	S	Special	Polar	6.3	5.68	-0.62	115	105	-10	112.7	89	-23.7	74	-0.8	P	S	N	P	P	L	350.062	350.319	351.593	loop	interface	interface	0.0754717	1	0	0	0	-0.03	2.97782	15.2291	0.0882639	0	2.29255	0	2.80521	7.10092	-1.444	0.487019	3.85478	0.0443888	6.56621	0	0	0
P	56	T	Special	Polar	6.3	5.6	-0.7	115	119	4	112.7	116.1	3.4	38	-0.9	P	S	N	P	P	L	350.062	350.319	351.593	loop	interface	interface	0.0754717	1	0	0	0	1.26	4.70083	24.0177	-3.48661	-3.15772	-0.633808	0	5.59832	2.14176	5.91302	1.20815	9.6612	6.77343	8.86447	0	0	0
P	56	V	Special	Hydrophobic	6.3	5.61	-0.69	115	117	2	112.7	140	27.3	68	-5.8	P	S	N	N	P	B	350.062	350.319	351.593	loop	interface	interface	0.0754717	1	0	0	0	29.8	4.42241	22.7551	-0.244264	0	-3.21516	0	6.07363	-4.21454	11.3997	0.738074	11.4403	0.777373	12.0235	0	0	0
P	56	W	Special	Hydrophobic	6.3	5.89	-0.41	115	204	89	112.7	227.8	115.1	147	-0.7	P	B	N	N	P	B	350.062	350.319	351.593	loop	interface	interface	0.0754717	1	0	0	0	9.04	9.55427	54.4763	-1.21595	-0.790053	-13.4328	2.84e-14	22.0276	-15.4613	41.6055	2.79291	13.128	5.64351	13.7092	0	0	0.17897
P	56	Y	Special	Hydrophobic	6.3	5.66	-0.64	115	181	66	112.7	193.6	80.9	110	-0.3	P	B	N	N	P	B	350.062	350.319	351.593	loop	interface	interface	0.0754717	1	0	0	0	7.32	9.31079	45.1768	-5.04394	-4.34244	-9.27561	-8.53e-14	14.0015	-9.22414	39.403	2.885	9.99502	6.63781	11.9196	0	0	0.140584
V	57	C	Hydrophobic	Special	5.61	5.07	-0.54	117	121	4	140	108.5	-31.5	192	1.7	S	S	N	P	B	C	346.456	346.205	347.751	strand	interface	interface	0.126437	4	0	0	0	-1.86	1.34827	7.05003	0.043687	0.0645665	3.27041	0	-3.34665	7.83018	-1.4156	2.06459	-0.700877	-0.694906	-0.71978	0	0	-0.0653699
V	57	D	Hydrophobic	negativeCharge	5.61	5.05	-0.56	117	133	16	140	111.1	-28.9	152	7.7	S	S	N	-	B	L	346.456	346.205	347.751	strand	interface	interface	0.126437	4	0	0	0	-1.86	5.12769	25.555	0.0540961	4.80256	1.92517	-7.7226	20.5654	8.12042	-0.717632	-1.2397	0.517534	-0.575956	-0.482834	4.63e-07	-2.61283	2.43857
V	57	E	Hydrophobic	negativeCharge	5.61	3.22	-2.39	117	147	30	140	138.4	-1.6	121	7.7	S	B	N	-	B	L	346.456	346.205	347.751	strand	interface	interface	0.126437	4	0	0	0	-1.86	5.02708	29.5788	-3.05701	0.826343	-1.25053	-4.64161	21.601	3.30485	4.9049	3.68278	3.09504	1.26572	-0.0480491	4.63e-07	-1.99129	1.83865
V	57	F	Hydrophobic	Hydrophobic	5.61	3.32	-2.29	117	165	48	140	189.9	49.9	50	1.4	S	B	N	N	B	B	346.456	346.205	347.751	strand	interface	interface	0.126437	4	0	0	0	0.12	6.74353	27.6996	0.162935	0.130286	-7.02992	-1.44326	8.86926	-7.81842	22.4558	2.96372	2.36763	6.94649	-0.382499	0	0	0.0950593
V	57	G	Hydrophobic	Special	5.61	3.29	-2.32	117	75	-42	140	60.1	-79.9	109	4.6	S	S	N	N	B	B	346.456	346.205	347.751	strand	interface	interface	0.126437	4	0	0	0	-1.86	2.82752	14.6928	0.391174	0.346247	11.5974	-0.000807095	-8.94119	18.9657	-2.38374	-3.50426	-0.939766	-0.772757	-2.55495	0	0	-0.065216
V	57	H	Hydrophobic	PositiveCharge	5.61	7.59	1.98	117	155	38	140	153.2	13.2	84	7.4	S	B	N	+	B	L	346.456	346.205	347.751	strand	interface	interface	0.126437	4	0	0	0	-1.74	5.11543	29.0786	-0.26408	-0.235373	-4.35081	0.06984	14.3621	0.228192	8.76821	3.04367	3.0688	3.5436	-0.512057	0	-3.91e-14	0.844416
V	57	I	Hydrophobic	Hydrophobic	5.61	6.02	0.41	117	131	14	140	166.7	26.7	29	-0.3	S	B	N	N	B	B	346.456	346.205	347.751	strand	interface	interface	0.126437	4	0	0	0	-0.09	1.70917	4.43761	-0.137866	-0.00123511	-3.36311	0.029667	3.46629	-5.33674	1.01738	3.24725	0.493966	5.00743	0.569318	-4.63e-07	5.96e-07	0.0145847
V	57	K	Hydrophobic	PositiveCharge	5.61	9.74	4.13	117	146	29	140	168.6	28.6	97	8.1	S	B	N	+	B	L	346.456	346.205	347.751	strand	interface	interface	0.126437	4	0	0	0	-0.5	4.23295	23.563	-2.86275	-2.9806	-3.45187	-3.69165	15.2135	-1.01424	4.38217	8.07033	1.55581	8.41009	-0.204829	0	-0.0836459	0.0158406
V	57	L	Hydrophobic	Hydrophobic	5.61	9.71	4.1	117	131	14	140	166.7	26.7	32	0.4	S	B	N	N	B	B	346.456	346.205	347.751	strand	interface	interface	0.126437	4	0	0	0	-0.98	1.54176	7.28189	-0.346479	-0.0536134	-3.18937	0	1.86318	-5.778	10.4718	2.74748	0.551167	1.02629	0.7097	0	0	-0.010507
V	57	N	Hydrophobic	Polar	5.61	5.47	-0.14	117	132	15	140	114.1	-25.9	133	7.7	S	S	N	P	B	L	346.456	346.205	347.751	strand	interface	interface	0.126437	4	0	0	0	-1.86	4.27385	19.2051	-0.68642	-0.760504	0.822575	0.0272794	7.44097	7.6066	0.191423	1.41646	0.882653	2.27674	-0.869874	-4.63e-07	5.96e-07	-0.0126571
V	57	P	Hydrophobic	Special	5.61	6.3	0.69	117	115	-2	140	112.7	-27.3	68	5.8	S	P	N	N	B	P	346.456	346.205	347.751	strand	interface	interface	0.126437	4	0	0	0	-1.86	3.18912	17.3113	0.139855	0.310987	4.65297	0.00895055	-5.97612	7.23482	14.6066	-1.28878	-2.36555	0.0194958	-2.3887	-3.29e-14	-2.03e-13	-0.0320101
V	57	Q	Hydrophobic	Polar	5.61	6.24	0.63	117	146	29	140	143.8	3.8	96	7.7	S	B	N	P	B	L	346.456	346.205	347.751	strand	interface	interface	0.126437	4	0	0	0	-1.86	4.59161	22.4628	-0.893209	0.0821375	-2.17569	-3.79e-06	10.1294	2.61811	5.76297	6.09891	0.947587	-0.0654074	0.478605	-4.63e-07	5.96e-07	-0.0419564
V	57	R	Hydrophobic	PositiveCharge	5.61	6.34	0.73	117	174	57	140	173.4	33.4	96	8.7	S	B	N	+	B	L	346.456	346.205	347.751	strand	interface	interface	0.126437	4	0	0	0	-0.5	8.97417	38.1977	-0.741993	0.555585	-6.06351	-5.31998	18.1572	0.61876	1.52712	7.70662	2.65743	19.2549	0.0578425	4.63e-07	-0.177415	0.0229516
V	57	S	Hydrophobic	Polar	5.61	5.68	0.07	117	105	-12	140	89	-51	124	5	S	S	N	P	B	L	346.456	346.205	347.751	strand	interface	interface	0.126437	4	0	0	0	-1.86	3.3711	17.2108	0.16628	0.306665	6.57418	8.24e-13	-0.792763	14.7628	-1.74577	-0.622965	-0.779523	-0.610472	-1.64308	-3.29e-14	-2.2e-13	-0.0476571
V	57	T	Hydrophobic	Polar	5.61	5.6	-0.01	117	119	2	140	116.1	-23.9	69	4.9	S	S	N	P	B	L	346.456	346.205	347.751	strand	interface	interface	0.126437	4	0	0	0	-1.86	1.67832	8.69455	0.0749467	0.0636006	2.49846	1.42e-12	2.11601	6.48946	-1.23375	0.0692348	-0.687575	-0.654492	-0.543673	-3.29e-14	-1.88e-13	-0.0413456
V	57	W	Hydrophobic	Hydrophobic	5.61	5.89	0.28	117	204	87	140	227.8	87.8	88	5.1	S	B	N	N	B	B	346.456	346.205	347.751	strand	interface	interface	0.126437	4	0	0	0	-1.86	9.42336	48.3191	-0.0455744	0.206404	-10.3774	0.120843	17.2676	-10.3657	23.5812	4.14478	4.64874	19.0811	0.11685	3.29e-14	-0.000484279	0.0575465
V	57	Y	Hydrophobic	Hydrophobic	5.61	5.66	0.05	117	181	64	140	193.6	53.6	55	5.5	S	B	N	N	B	B	346.456	346.205	347.751	strand	interface	interface	0.126437	4	0	0	0	-1.86	5.12858	36.505	-0.794349	-5.94957	-7.86731	-1.22004	10.7464	-7.2056	35.511	3.60056	5.17766	4.42471	-0.281747	0	0	0.0815715
K	58	A	PositiveCharge	Hydrophobic	9.74	6	-3.74	146	89	-57	168.6	88.6	-80	106	-5.7	B	S	+	N	L	B	343.926	342.531	344.787	loop	interface	interface	0.483051	5	0	0	0	-3.22	0.613194	4.34406	-0.0851398	0.00842052	3.70637	0.330408	-1.25683	6.93254	-0.00544074	-3.37019	-1.54794	-0.0385677	-0.290519	0	-0.329575	0
K	58	C	PositiveCharge	Special	9.74	5.07	-4.67	146	121	-25	168.6	108.5	-60.1	202	-6.4	B	S	+	P	L	C	343.926	342.531	344.787	loop	interface	interface	0.483051	5	0	0	0	-3.22	1.16322	7.0141	-0.0429877	-0.592963	1.7185	0.0864502	0.314079	4.89004	0.211042	-0.784943	1.48732	0.0571423	0.0180461	0	-0.329575	0
K	58	D	PositiveCharge	negativeCharge	9.74	5.05	-4.69	146	133	-13	168.6	111.1	-57.5	101	-0.4	B	S	+	-	L	L	343.926	342.531	344.787	loop	interface	interface	0.483051	5	0	0	0	-3.22	1.5123	8.51378	0	0.0403666	2.40236	1.25712	2.17222	5.39828	-0.0273757	-1.83833	-0.216069	0.127564	0.0207277	0	-0.802362	0
K	58	E	PositiveCharge	negativeCharge	9.74	3.22	-6.52	146	147	1	168.6	138.4	-30.2	56	-0.4	B	B	+	-	L	L	343.926	342.531	344.787	loop	interface	interface	0.483051	5	0	0	0	-3.22	0.806513	5.17798	-0.0250623	-0.0042967	0.527017	0.642098	3.82338	2.18976	0.0410092	-0.454619	-0.65369	0.0229564	0.0962774	0	-0.930571	0
K	58	F	PositiveCharge	Hydrophobic	9.74	3.32	-6.42	146	165	19	168.6	189.9	21.3	102	-6.7	B	B	+	N	L	B	343.926	342.531	344.787	loop	interface	interface	0.483051	5	0	0	0	2.57	-0.326805	-0.31686	-0.00691132	0.0585261	-1.23316	0.0635325	-0.123069	-1.76969	0.225974	0.260935	2.16855	0.368022	0.156527	0	-0.329575	0
K	58	G	PositiveCharge	Special	9.74	3.29	-6.45	146	75	-71	168.6	60.1	-108.5	127	-3.5	B	S	+	N	L	B	343.926	342.531	344.787	loop	interface	interface	0.483051	5	0	0	0	-3.22	1.83158	10.7479	0.221303	0.170312	5.98751	0.440614	-3.50485	10.7473	-0.106982	-3.44663	0.63681	-0.0678366	-0.802933	0	-0.329575	0
K	58	H	PositiveCharge	PositiveCharge	9.74	7.59	-2.15	146	155	9	168.6	153.2	-15.4	32	-0.7	B	B	+	+	L	L	343.926	342.531	344.787	loop	interface	interface	0.483051	5	0	0	0	-3.09	0.985543	4.43509	-0.0245968	-3.23168	0.530905	0.247108	1.89325	2.52781	0.0220906	-0.0840638	2.62104	0.0188881	0.348674	0	-0.329575	0.243912
K	58	I	PositiveCharge	Hydrophobic	9.74	6.02	-3.72	146	131	-15	168.6	166.7	-1.9	102	-8.4	B	B	+	N	L	B	343.926	342.531	344.787	loop	interface	interface	0.483051	5	0	0	0	1.93	-0.305535	-0.469691	-0.234551	-0.0928209	-2.0558	-0.0279644	2.73868	-3.3701	1.19317	0.361368	1.12877	0.213612	0.774698	3.29e-14	-0.324058	1.01e-12
K	58	L	PositiveCharge	Hydrophobic	9.74	9.71	-0.03	146	131	-15	168.6	166.7	-1.9	107	-7.7	B	B	+	N	L	B	343.926	342.531	344.787	loop	interface	interface	0.483051	5	0	0	0	-1.01	-0.653039	-1.81707	-0.112604	0.0384434	-0.499288	0.300583	0.431968	-1.19825	0.177485	-0.436516	-0.315859	0.126538	0.550188	0	-0.329575	0
K	58	P	PositiveCharge	Special	9.74	6.3	-3.44	146	115	-31	168.6	112.7	-55.9	103	-2.3	B	P	+	N	L	P	343.926	342.531	344.787	loop	interface	interface	0.483051	5	0	0	0	-3.22	4.75641	26.5664	5.96141	-0.104382	0.628465	0.31407	-1.11027	-0.028491	28.8602	-2.10964	-5.60773	0.0923989	-4.41512	3.29e-14	-0.329575	1.01e-12
K	58	R	PositiveCharge	PositiveCharge	9.74	6.34	-3.4	146	174	28	168.6	173.4	4.8	26	0.6	B	B	+	+	L	L	343.926	342.531	344.787	loop	interface	interface	0.483051	5	0	0	0	-1.86	0.142985	1.75819	0	-0.0019288	-0.829796	0.0212172	1.37659	0.350881	0.00632904	0.0118196	0.486729	0.331865	-0.0137556	0	0.00448513	0
K	58	S	PositiveCharge	Polar	9.74	5.68	-4.06	146	105	-41	168.6	89	-79.6	121	-3.1	B	S	+	P	L	L	343.926	342.531	344.787	loop	interface	interface	0.483051	5	0	0	0	-3.22	1.57147	7.63276	-0.0248065	-2.92958	3.19746	0.254584	1.01198	8.24776	-0.0148812	-1.59663	-0.538001	0.354442	-0.131434	0	-0.329575	0
K	58	T	PositiveCharge	Polar	9.74	5.6	-4.14	146	119	-27	168.6	116.1	-52.5	78	-3.2	B	S	+	P	L	L	343.926	342.531	344.787	loop	interface	interface	0.483051	5	0	0	0	-3.22	1.23605	7.33754	-0.0301612	-0.12004	0.989267	-0.0113868	2.84907	3.4071	1.29424	-1.18439	0.278074	0.191842	0.220312	3.29e-14	-0.326069	1.01e-12
K	58	V	PositiveCharge	Hydrophobic	9.74	5.61	-4.13	146	117	-29	168.6	140	-28.6	97	-8.1	B	S	+	N	L	B	343.926	342.531	344.787	loop	interface	interface	0.483051	5	0	0	0	2.2	0.640015	3.71905	-0.119162	-0.107528	0.0109621	-0.0220846	2.60708	1.05142	1.27193	-1.13975	0.393261	0.0972305	0.570931	3.29e-14	-0.324315	1.01e-12
K	58	W	PositiveCharge	Hydrophobic	9.74	5.89	-3.85	146	204	58	168.6	227.8	59.2	110	-3	B	B	+	N	L	B	343.926	342.531	344.787	loop	interface	interface	0.483051	5	0	0	0	-1.56	-0.369504	-0.457433	-0.00631548	0.0578563	-1.68607	0.274393	0.424089	-2.27972	0.145395	0.146069	2.78868	0.0077685	0.116712	0	-0.329575	0
K	58	Y	PositiveCharge	Hydrophobic	9.74	5.66	-4.08	146	181	35	168.6	193.6	25	85	-2.6	B	B	+	N	L	B	343.926	342.531	344.787	loop	interface	interface	0.483051	5	0	0	0	-1.86	0.00559407	1.49947	-0.000177218	0.0576247	-0.491006	-0.160919	0.374858	-0.111789	0.0759471	-0.0585255	2.08891	0.0541243	0.210871	0	-0.329575	0
D	59	A	negativeCharge	Hydrophobic	5.05	6	0.95	133	89	-44	111.1	88.6	-22.5	126	-5.3	S	S	-	N	L	B	341.144	340.612	342.257	loop	interface	interface	0.295337	3	0	0	0	-1.86	0.126623	5.42639	0.537257	4.61296	2.85601	4.4538	-7.4456	1.65038	-0.334062	-4.17528	2.96243	-0.158361	-0.509225	3.29e-14	0.466844	1.01e-12
D	59	C	negativeCharge	Special	5.05	5.07	0.02	133	121	-12	111.1	108.5	-2.6	154	-6	S	S	-	P	L	C	341.144	340.612	342.257	loop	interface	interface	0.295337	3	0	0	0	-1.86	-0.191588	4.11231	0.0105519	3.77231	-0.114103	3.27565	-3.11762	-0.458591	-0.0730999	-0.985709	1.57138	-0.131793	0.0175427	3.29e-14	0.363336	1.01e-12
D	59	G	negativeCharge	Special	5.05	3.29	-1.76	133	75	-58	111.1	60.1	-51	94	-3.1	S	S	-	N	L	B	341.144	340.612	342.257	loop	interface	interface	0.295337	3	0	0	0	-1.86	0.624692	8.15594	0.0109647	5.06553	3.91299	4.00364	-9.01122	3.44134	-0.179289	-3.51019	4.24154	-0.165773	-0.488525	0	0.346395	0
D	59	H	negativeCharge	PositiveCharge	5.05	7.59	2.54	133	155	22	111.1	153.2	42.1	81	-0.3	S	B	-	+	L	L	341.144	340.612	342.257	loop	interface	interface	0.295337	3	0	0	0	-1.74	0.722316	7.0561	-0.628986	0.53988	-1.72383	2.54729	2.28232	-1.32116	-0.00458015	0.446754	4.36453	-0.143491	-0.0371796	3.29e-14	0.242759	0.454612
D	59	I	negativeCharge	Hydrophobic	5.05	6.02	0.97	133	131	-2	111.1	166.7	55.6	168	-8	S	B	-	N	L	B	341.144	340.612	342.257	loop	interface	interface	0.295337	3	0	0	0	-1.86	-1.06421	1.11097	-0.262996	4.54646	-2.94003	3.26968	1.57536	-4.9898	-0.200396	-0.349137	-0.639927	0.727573	0.0759368	3.29e-14	0.374185	1.01e-12
D	59	K	negativeCharge	PositiveCharge	5.05	9.74	4.69	133	146	13	111.1	168.6	57.5	101	0.4	S	B	-	+	L	L	341.144	340.612	342.257	loop	interface	interface	0.295337	3	0	0	0	-0.5	-0.305749	3.28659	0.528053	0.00176103	-1.07408	1.86158	1.29708	-2.37789	-0.25994	1.13373	2.21666	-0.138526	-0.37013	3.29e-14	0.0981583	1.01e-12
D	59	N	negativeCharge	Polar	5.05	5.47	0.42	133	132	-1	111.1	114.1	3	23	0	S	S	-	P	L	L	341.144	340.612	342.257	loop	interface	interface	0.295337	3	0	0	0	-1.86	-0.0808931	-0.545427	-0.800918	-5.42381	-0.302648	3.8732	-0.895476	-0.134568	0.0657998	0.807646	0.33904	1.50986	0.0639315	0	0.41644	0
D	59	P	negativeCharge	Special	5.05	6.3	1.25	133	115	-18	111.1	112.7	1.6	108	-1.9	S	P	-	N	L	P	341.144	340.612	342.257	loop	interface	interface	0.295337	3	0	0	0	-1.86	2.51518	18.0595	3.04693	6.69732	1.13147	4.26065	-8.54885	-2.3827	10.3556	-3.48433	6.62221	-0.133594	-5.38219	3.29e-14	0.494765	1.01e-12
D	59	R	negativeCharge	PositiveCharge	5.05	6.34	1.29	133	174	41	111.1	173.4	62.3	96	1	S	B	-	+	L	L	341.144	340.612	342.257	loop	interface	interface	0.295337	3	0	0	0	-0.5	-0.960842	3.72323	-2.54014	0.867147	-2.60874	1.06884	3.10984	-2.62682	-0.557971	2.14235	4.5925	0.330822	-0.309531	3.29e-14	-0.0469498	-0.00765646
D	59	S	negativeCharge	Polar	5.05	5.68	0.63	133	105	-28	111.1	89	-22.1	65	-2.7	S	S	-	P	L	L	341.144	340.612	342.257	loop	interface	interface	0.295337	3	0	0	0	-1.86	-0.0486675	3.73248	0.511403	-0.443095	1.13789	3.96268	-3.40683	1.79058	-0.0892477	-1.45629	0.789019	0.532413	0.154585	3.29e-14	0.40395	1.01e-12
D	59	T	negativeCharge	Polar	5.05	5.6	0.55	133	119	-14	111.1	116.1	5	85	-2.8	S	S	-	P	L	L	341.144	340.612	342.257	loop	interface	interface	0.295337	3	0	0	0	-1.86	-0.148934	2.99776	0.351361	0.808879	0.597119	3.90953	-1.69204	1.07612	-0.131201	-1.62944	-0.985515	0.275426	-0.11904	0	0.417527	0
I	60	A	Hydrophobic	Hydrophobic	6.02	6	-0.02	131	89	-42	166.7	88.6	-78.1	94	2.7	B	S	N	N	B	B	342.054	341.497	342.707	loop	surface	surface.internal	0.80203	0	0	0	0	-1.86	-0.211011	-1.11865	2.35e-10	1.5e-10	0.589301	-1.91e-11	-1.02119	0.644297	-0.00342125	-0.242734	-0.935871	-0.149028	0.0040667	3.29e-14	-1.07e-11	1.01e-12
I	60	C	Hydrophobic	Special	6.02	5.07	-0.95	131	121	-10	166.7	108.5	-58.2	198	2	B	S	N	P	B	C	342.054	341.497	342.707	loop	surface	surface.internal	0.80203	0	0	0	0	-1.86	0.0716296	0.322559	-0.000166088	-0.0128835	0.629699	-0.00802626	-1.18929	0.709105	0.00722135	-0.169831	0.540653	-0.183612	-0.0966683	-3.29e-14	-0.00030547	-9.91e-13
I	60	E	Hydrophobic	negativeCharge	6.02	3.22	-2.8	131	147	16	166.7	138.4	-28.3	134	8	B	B	N	-	B	L	342.054	341.497	342.707	loop	surface	surface.internal	0.80203	0	0	0	0	-1.86	-0.0845527	-0.662711	-2.53886	-2.53886	0.188347	0.929873	-0.174996	0.237392	2.27e-13	2.3022	1.00003	-0.101142	0.0554203	0	0.0333175	-3.55e-15
I	60	F	Hydrophobic	Hydrophobic	6.02	3.32	-2.7	131	165	34	166.7	189.9	23.2	21	1.7	B	B	N	N	B	B	342.054	341.497	342.707	loop	surface	surface.internal	0.80203	0	0	0	0	0.23	-0.451439	-2.47161	2.35e-10	1.58e-10	-4.43562	-0.363682	3.53023	-6.89925	0.014059	3.34778	2.60278	-0.267908	-0.0646273	3.29e-14	-1.08e-11	1.03e-12
I	60	G	Hydrophobic	Special	6.02	3.29	-2.73	131	75	-56	166.7	60.1	-106.6	135	4.9	B	S	N	N	B	B	342.054	341.497	342.707	loop	surface	surface.internal	0.80203	0	0	0	0	-1.86	0.151751	0.700539	0	0	1.54189	0	-2.55316	1.73664	4.15e-05	-0.449711	0.582097	-0.157265	-0.139505	0	0	0
I	60	H	Hydrophobic	PositiveCharge	6.02	7.59	1.57	131	155	24	166.7	153.2	-13.5	94	7.7	B	B	N	+	B	L	342.054	341.497	342.707	loop	surface	surface.internal	0.80203	0	0	0	0	-1.74	0.014434	-0.174393	0	0	-0.0341111	1.14e-13	-0.0337882	-0.106875	0	0.0265386	-0.130179	-0.139891	0.0133797	0	7.11e-15	0.243912
I	60	K	Hydrophobic	PositiveCharge	6.02	9.74	3.72	131	146	15	166.7	168.6	1.9	102	8.4	B	B	N	+	B	L	342.054	341.497	342.707	loop	surface	surface.internal	0.80203	0	0	0	0	-0.5	-0.679966	-3.23097	0	-2.27e-13	-1.6573	-0.511786	0.415071	-3.12977	7.96e-13	1.56033	0.320523	-0.146272	-0.0908116	0	-0.081758	0
I	60	L	Hydrophobic	Hydrophobic	6.02	9.71	3.69	131	131	0	166.7	166.7	0	5	0.7	B	B	N	N	B	B	342.054	341.497	342.707	loop	surface	surface.internal	0.80203	0	0	0	0	-0.93	-0.414218	-2.05361	2.35e-10	1.54e-10	-1.8597	-1.84e-11	1.26493	-3.34502	0.00302855	1.20129	0.763024	-0.081161	-0.0464358	3.29e-14	-1.1e-11	9.7e-13
I	60	P	Hydrophobic	Special	6.02	6.3	0.28	131	115	-16	166.7	112.7	-54	95	6.1	B	P	N	N	B	P	342.054	341.497	342.707	loop	surface	surface.internal	0.80203	0	0	0	0	-1.86	-1.13152	-6.00693	0	0.0303906	0.506721	-0.0578314	-1.06042	0.600827	-2.2e-08	-0.37248	-5.50348	-0.150655	0.198949	0	0	0
I	60	Q	Hydrophobic	Polar	6.02	6.24	0.22	131	146	15	166.7	143.8	-22.9	109	8	B	B	N	P	B	L	342.054	341.497	342.707	loop	surface	surface.internal	0.80203	0	0	0	0	-1.86	-0.12798	-0.593479	0	0	0.120616	2.84e-14	-0.661671	-0.134189	0	0.124543	0.102732	-0.14551	-0.0899141	0	0	1.07e-14
I	60	R	Hydrophobic	PositiveCharge	6.02	6.34	0.32	131	174	43	166.7	173.4	6.7	97	9	B	B	N	+	B	L	342.054	341.497	342.707	loop	surface	surface.internal	0.80203	0	0	0	0	-0.5	-0.409487	-2.0143	0	0	-0.777955	-1.27736	-0.48619	-1.85844	0	1.43666	0.984863	0.238645	-0.079903	0	-0.27453	1.07e-14
I	60	S	Hydrophobic	Polar	6.02	5.68	-0.34	131	105	-26	166.7	89	-77.7	142	5.3	B	S	N	P	B	L	342.054	341.497	342.707	loop	surface	surface.internal	0.80203	0	0	0	0	-1.86	-0.0272127	-0.123298	0	0	0.913923	0	-1.09714	1.39145	0	-0.403574	-0.777953	-0.150002	-0.0922136	0	0	0
I	60	T	Hydrophobic	Polar	6.02	5.6	-0.42	131	119	-12	166.7	116.1	-50.6	89	5.2	B	S	N	P	B	L	342.054	341.497	342.707	loop	surface	surface.internal	0.80203	0	0	0	0	-1.86	0.0309075	0.0946262	0	0	0.447177	0	-0.555213	0.655621	0	-0.17833	-0.114676	-0.159953	-0.0450547	0	0	0
I	60	V	Hydrophobic	Hydrophobic	6.02	5.61	-0.41	131	117	-14	166.7	140	-26.7	29	0.3	B	S	N	N	B	B	342.054	341.497	342.707	loop	surface	surface.internal	0.80203	0	0	0	0	0.1	0.127891	0.485926	0	0	0.279124	0	0.0102059	0.648013	0	-0.241335	0.0244782	-0.234561	0.0170235	0	0	0
M	61	A	Hydrophobic	Hydrophobic	5.74	6	0.26	149	89	-60	162.9	88.6	-74.3	84	0.1	B	S	N	N	B	B	342.265	343.066	344.296	loop	interface	interface	0.125	3	0	0	0	-0.58	3.16962	16.0069	0.307989	0.507952	9.87692	0.00920418	-6.27818	15.1873	-0.68387	-5.31783	2.62104	-0.100964	-0.524623	0	0	-0.122651
M	61	C	Hydrophobic	Special	5.74	5.07	-0.67	149	121	-28	162.9	108.5	-54.4	196	-0.6	B	S	N	P	B	C	342.265	343.066	344.296	loop	interface	interface	0.125	3	0	0	0	-1.86	2.41924	11.3947	-0.187735	-1.10651	6.9143	1.53e-11	-4.42595	11.7231	-0.966166	-2.17309	1.47217	0.239888	-0.632059	-3.29e-14	1.06e-11	-0.0952705
M	61	E	Hydrophobic	negativeCharge	5.74	3.22	-2.52	149	147	-2	162.9	138.4	-24.5	126	5.4	B	B	N	-	B	L	342.265	343.066	344.296	loop	interface	interface	0.125	3	0	0	0	-1.86	2.11558	10.7289	0.165135	-4.01267	3.66391	-6.80908	10.4184	8.06025	-0.279129	0.440312	-0.626013	0.0201738	-0.4454	3.29e-14	-1.91633	1.60392
M	61	F	Hydrophobic	Hydrophobic	5.74	3.32	-2.42	149	165	16	162.9	189.9	27	28	-0.9	B	B	N	N	B	B	342.265	343.066	344.296	loop	interface	interface	0.125	3	0	0	0	18.54	2.37324	10.5085	0.0309664	-2.12805	-0.654985	-0.237022	3.97838	0.942381	7.64701	-1.35602	2.1324	0.186389	2.23274	0	0	-0.0329477
M	61	G	Hydrophobic	Special	5.74	3.29	-2.45	149	75	-74	162.9	60.1	-102.8	127	2.3	B	S	N	N	B	B	342.265	343.066	344.296	loop	interface	interface	0.125	3	0	0	0	-1.86	3.18932	16.0827	0.260133	0.38014	11.8283	-0.0126972	-8.52286	18.0432	-0.265694	-5.32365	0.299574	-0.433061	-0.707234	3.29e-14	-8.15e-12	-0.170745
M	61	H	Hydrophobic	PositiveCharge	5.74	7.59	1.85	149	155	6	162.9	153.2	-9.7	87	5.1	B	B	N	+	B	L	342.265	343.066	344.296	loop	interface	interface	0.125	3	0	0	0	-1.74	2.95016	16.6812	-0.585373	-1.29291	2.3879	-0.00523146	5.64292	7.66543	1.35293	-1.1876	2.42064	-0.0490816	1.19623	0	0	0.331621
M	61	K	Hydrophobic	PositiveCharge	5.74	9.74	4	149	146	-3	162.9	168.6	5.7	95	5.8	B	B	N	+	B	L	342.265	343.066	344.296	loop	interface	interface	0.125	3	0	0	0	-0.5	0.809757	4.76229	-0.195875	-15.0084	0.352221	-1.87364	14.5212	3.53874	0.146967	4.14413	-0.499386	-0.00892885	0.0268799	-3.29e-14	-0.349089	-0.00565837
M	61	L	Hydrophobic	Hydrophobic	5.74	9.71	3.97	149	131	-18	162.9	166.7	3.8	15	-1.9	B	B	N	N	B	B	342.265	343.066	344.296	loop	interface	interface	0.125	3	0	0	0	7.36	0.293613	1.46882	0.265053	-0.0657721	2.48861	1.35e-11	-1.05874	2.59762	-0.305833	-1.52881	-0.892309	0.00352232	-0.193384	-3.29e-14	8.22e-12	-0.0345222
M	61	N	Hydrophobic	Polar	5.74	5.47	-0.27	149	132	-17	162.9	114.1	-48.8	142	5.4	B	S	N	P	B	L	342.265	343.066	344.296	loop	interface	interface	0.125	3	0	0	0	-1.86	2.59313	13.0209	0.306713	-1.68934	5.63856	-2.84e-14	1.13035	11.6124	-0.422191	-2.10687	-1.32028	-0.0296838	-0.375966	0	0	-0.0987956
M	61	P	Hydrophobic	Special	5.74	6.3	0.56	149	115	-34	162.9	112.7	-50.2	87	3.5	B	P	N	N	B	P	342.265	343.066	344.296	loop	interface	interface	0.125	3	0	0	0	-1.86	2.27343	11.7699	0.29501	0.461132	5.47824	0.0536439	-3.33098	7.8177	0.536968	-3.19397	2.93682	0.781403	-0.377984	3.29e-14	-6.56e-12	-0.0660961
M	61	Q	Hydrophobic	Polar	5.74	6.24	0.5	149	146	-3	162.9	143.8	-19.1	101	5.4	B	B	N	P	B	L	342.265	343.066	344.296	loop	interface	interface	0.125	3	0	0	0	-1.86	2.06352	10.51	0.10502	-4.35731	2.65472	1.53e-11	3.94797	7.64278	-0.29783	0.997487	-0.167052	0.0224218	-0.358985	-3.29e-14	1.06e-11	-0.0382377
M	61	R	Hydrophobic	PositiveCharge	5.74	6.34	0.6	149	174	25	162.9	173.4	10.5	91	6.4	B	B	N	+	B	L	342.265	343.066	344.296	loop	interface	interface	0.125	3	0	0	0	-0.5	2.01712	10.1602	-3.48087	-7.63879	-1.48212	-4.80373	13.0383	5.77288	0.670995	3.83972	2.97901	1.90218	0.913961	3.29e-14	-0.566795	-0.0706429
M	61	S	Hydrophobic	Polar	5.74	5.68	-0.06	149	105	-44	162.9	89	-73.9	135	2.7	B	S	N	P	B	L	342.265	343.066	344.296	loop	interface	interface	0.125	3	0	0	0	-1.86	3.14838	16.1486	-0.414691	-0.451892	8.70455	0.00243952	-2.94209	15.5309	-0.693693	-3.2275	-0.310868	0.0678765	-0.570802	0	0	-0.116392
M	61	T	Hydrophobic	Polar	5.74	5.6	-0.14	149	119	-30	162.9	116.1	-46.8	81	2.6	B	S	N	P	B	L	342.265	343.066	344.296	loop	interface	interface	0.125	3	0	0	0	-0.95	2.72543	13.4226	0.220581	0.272709	6.86726	0.00926619	-0.448256	12.1457	-0.375414	-3.33083	-2.20985	0.351259	-0.563435	0	0	-0.0798553
M	61	V	Hydrophobic	Hydrophobic	5.74	5.61	-0.13	149	117	-32	162.9	140	-22.9	21	-2.3	B	S	N	N	B	B	342.265	343.066	344.296	loop	interface	interface	0.125	3	0	0	0	17.27	1.50773	7.81559	0.308481	0.353512	5.51719	-0.00841193	-1.68517	8.875	-0.573937	-3.30564	-1.53702	-0.0686347	-0.00375252	0	0	-0.0597748
M	61	W	Hydrophobic	Hydrophobic	5.74	5.89	0.15	149	204	55	162.9	227.8	64.9	67	2.8	B	B	N	N	B	B	342.265	343.066	344.296	loop	interface	interface	0.125	3	0	0	0	4.63	4.26423	22.0314	-0.0947701	0.283202	-5.82595	0.0573907	13.9459	-3.81534	13.1214	-0.0562713	4.87063	-0.525817	5.00637	3.29e-14	-5.27e-12	0.0710155
M	61	Y	Hydrophobic	Hydrophobic	5.74	5.66	-0.08	149	181	32	162.9	193.6	30.7	36	3.2	B	B	N	N	B	B	342.265	343.066	344.296	loop	interface	interface	0.125	3	0	0	0	3.45	2.20665	9.70759	-1.98078	-4.47414	-1.82119	-0.16446	7.56223	1.60318	6.13317	-0.777169	2.41873	1.24771	3.27843	3.29e-14	-5.24e-12	-0.0396983
I	62	A	Hydrophobic	Hydrophobic	6.02	6	-0.02	131	89	-42	166.7	88.6	-78.1	94	2.7	B	S	N	N	B	B	341.125	340.17	341.536	loop	surface	surface.internal	0.497462	0	0	0	0	-1.86	0.727834	3.84054	3.42e-09	9.11e-10	3.26982	-4.52e-12	-2.50694	5.69699	0.0357132	-2.90018	0.518499	-0.273358	-1.40072	3.29e-14	-5.24e-12	2.46e-08
I	62	C	Hydrophobic	Special	6.02	5.07	-0.95	131	121	-10	166.7	108.5	-58.2	198	2	B	S	N	P	B	C	341.125	340.17	341.536	loop	surface	surface.internal	0.497462	0	0	0	0	-1.86	0.66554	3.3655	3.42e-09	-0.515026	1.69463	-4.15e-12	-1.18674	3.99549	-0.00919894	-0.50719	0.159075	-0.265537	-0.274575	3.29e-14	-5.02e-12	2.46e-08
I	62	D	Hydrophobic	negativeCharge	6.02	5.05	-0.97	131	133	2	166.7	111.1	-55.6	168	8	B	S	N	-	B	L	341.125	340.17	341.536	loop	surface	surface.internal	0.497462	0	0	0	0	-1.86	0.714834	2.56555	3.42e-09	-3.39743	2.61041	0.94017	-0.702308	5.1532	-0.00604544	-0.691568	-1.5731	-0.24572	-0.957215	3.29e-14	0.477957	2.46e-08
I	62	E	Hydrophobic	negativeCharge	6.02	3.22	-2.8	131	147	16	166.7	138.4	-28.3	134	8	B	B	N	-	B	L	341.125	340.17	341.536	loop	surface	surface.internal	0.497462	0	0	0	0	-1.86	0.716874	3.58435	-0.020803	-1.48256	1.75826	0.862672	-1.13407	3.20622	-0.0139637	-0.0392174	0.260213	-0.262374	-0.875625	0	0.449981	0
I	62	F	Hydrophobic	Hydrophobic	6.02	3.32	-2.7	131	165	34	166.7	189.9	23.2	21	1.7	B	B	N	N	B	B	341.125	340.17	341.536	loop	surface	surface.internal	0.497462	0	0	0	0	0.23	0.15752	0.711162	3.42e-09	9.11e-10	-0.773456	-4.29e-12	0.360118	-0.771624	-0.00108101	0.543441	1.53618	-0.182412	-1.46899	3.29e-14	-4.75e-12	2.46e-08
I	62	G	Hydrophobic	Special	6.02	3.29	-2.73	131	75	-56	166.7	60.1	-106.6	135	4.9	B	S	N	N	B	B	341.125	340.17	341.536	loop	surface	surface.internal	0.497462	0	0	0	0	-1.86	1.20673	6.29561	3.42e-09	9.11e-10	5.49254	-4.04e-12	-4.65247	9.23935	0.00460322	-3.65296	0.262583	-0.398035	-2.72398	3.29e-14	-4.86e-12	2.46e-08
I	62	H	Hydrophobic	PositiveCharge	6.02	7.59	1.57	131	155	24	166.7	153.2	-13.5	94	7.7	B	B	N	+	B	L	341.125	340.17	341.536	loop	surface	surface.internal	0.497462	0	0	0	0	-1.74	0.645214	3.50486	3.42e-09	9.11e-10	2.21585	-4.01e-12	-1.58766	4.08797	-0.016329	-1.55451	0.446358	-0.330729	-1.66797	3.29e-14	-4.85e-12	0.243913
I	62	K	Hydrophobic	PositiveCharge	6.02	9.74	3.72	131	146	15	166.7	168.6	1.9	102	8.4	B	B	N	+	B	L	341.125	340.17	341.536	loop	surface	surface.internal	0.497462	0	0	0	0	-0.5	0.0062477	0.341787	-0.0469775	-1.50551	1.16762	-0.423249	-1.01325	1.90681	0.00801799	0.679909	0.0942455	-0.2655	-0.777609	0	-0.260328	0
I	62	L	Hydrophobic	Hydrophobic	6.02	9.71	3.69	131	131	0	166.7	166.7	0	5	0.7	B	B	N	N	B	B	341.125	340.17	341.536	loop	surface	surface.internal	0.497462	0	0	0	0	-0.93	0.101283	0.767115	-0.0421053	0	0.0704588	0	-0.0110425	0.096418	0.0080621	0.0252138	0.774009	-0.153899	-0.426433	0	0	0
I	62	N	Hydrophobic	Polar	6.02	5.47	-0.55	131	132	1	166.7	114.1	-52.6	149	8	B	S	N	P	B	L	341.125	340.17	341.536	loop	surface	surface.internal	0.497462	0	0	0	0	-1.86	0.597041	2.77518	-0.0144769	-3.39935	1.64722	-4.29e-12	0.23186	4.16878	0.0442267	0.756657	-0.384143	-0.275591	-0.23881	3.29e-14	-5.09e-12	2.46e-08
I	62	P	Hydrophobic	Special	6.02	6.3	0.28	131	115	-16	166.7	112.7	-54	95	6.1	B	P	N	N	B	P	341.125	340.17	341.536	loop	surface	surface.internal	0.497462	0	0	0	0	-1.86	0.124551	0.497136	3.42e-09	9.11e-10	1.3672	-4.29e-12	-1.86406	2.18018	-0.00399436	-1.06978	0.167333	-0.279744	-0.779777	3.29e-14	-4.75e-12	2.46e-08
I	62	Q	Hydrophobic	Polar	6.02	6.24	0.22	131	146	15	166.7	143.8	-22.9	109	8	B	B	N	P	B	L	341.125	340.17	341.536	loop	surface	surface.internal	0.497462	0	0	0	0	-1.86	0.483159	2.82087	-2.09196	-3.18242	0.297608	0	1.31767	1.84717	-0.00696507	2.74341	1.92857	-0.0322221	-0.648375	0	0	0
I	62	R	Hydrophobic	PositiveCharge	6.02	6.34	0.32	131	174	43	166.7	173.4	6.7	97	9	B	B	N	+	B	L	341.125	340.17	341.536	loop	surface	surface.internal	0.497462	0	0	0	0	-0.5	-0.202251	0.357847	0	0	0.677039	-1.04878	-1.03654	1.37771	-0.00876311	0.662673	0.226005	0.0737887	-1.0431	0	-0.565276	0
I	62	S	Hydrophobic	Polar	6.02	5.68	-0.34	131	105	-26	166.7	89	-77.7	142	5.3	B	S	N	P	B	L	341.125	340.17	341.536	loop	surface	surface.internal	0.497462	0	0	0	0	-1.86	1.17613	6.11991	3.42e-09	9.11e-10	3.64345	-4.29e-12	-2.27099	7.21119	0.0092524	-2.59003	0.439995	-0.322955	-2.07546	3.29e-14	-4.75e-12	2.46e-08
I	62	T	Hydrophobic	Polar	6.02	5.6	-0.42	131	119	-12	166.7	116.1	-50.6	89	5.2	B	S	N	P	B	L	341.125	340.17	341.536	loop	surface	surface.internal	0.497462	0	0	0	0	-1.86	0.625407	3.25858	3.42e-09	9.11e-10	2.53617	-4.29e-12	-1.28909	4.9756	-0.00170693	-1.93235	-0.752658	-0.277392	-0.665239	3.29e-14	-4.74e-12	2.46e-08
I	62	V	Hydrophobic	Hydrophobic	6.02	5.61	-0.41	131	117	-14	166.7	140	-26.7	29	0.3	B	S	N	N	B	B	341.125	340.17	341.536	loop	surface	surface.internal	0.497462	0	0	0	0	0.1	0.494279	2.63927	3.42e-09	9.11e-10	1.38052	-4.29e-12	-0.19426	3.04438	-0.00475422	-1.20739	-0.0836785	-0.295546	-0.171983	3.29e-14	-4.74e-12	2.46e-08
I	62	W	Hydrophobic	Hydrophobic	6.02	5.89	-0.13	131	204	73	166.7	227.8	61.1	61	5.4	B	B	N	N	B	B	341.125	340.17	341.536	loop	surface	surface.internal	0.497462	0	0	0	0	-1.86	0.490275	2.64783	3.42e-09	9.11e-10	-0.483505	-4.29e-12	0.356978	-0.271098	0.0472874	0.336109	2.89557	-0.233516	-1.81845	3.29e-14	-4.74e-12	2.46e-08
I	62	Y	Hydrophobic	Hydrophobic	6.02	5.66	-0.36	131	181	50	166.7	193.6	26.9	33	5.8	B	B	N	N	B	B	341.125	340.17	341.536	loop	surface	surface.internal	0.497462	0	0	0	0	-1.86	0.108473	1.13581	0	0	-0.124337	0	-0.230052	0.197023	0.0146917	0.112971	1.4073	-0.241791	-1.53501	0	0	0
K	63	A	PositiveCharge	Hydrophobic	9.74	6	-3.74	146	89	-57	168.6	88.6	-80	106	-5.7	B	S	+	N	L	B	343.272	344.331	347.167	loop	interface	interface	0.338983	5	0	0	0	9.6	1.60437	9.70097	0.224282	4.93	5.4082	5.35753	-8.6977	7.7862	-0.11609	-7.79746	1.62538	-0.107353	-1.3973	3.38e-14	1.05544	0.03254
K	63	C	PositiveCharge	Special	9.74	5.07	-4.67	146	121	-25	168.6	108.5	-60.1	202	-6.4	B	S	+	P	L	C	343.272	344.331	347.167	loop	interface	interface	0.338983	5	0	0	0	-0.18	2.68128	12.7391	0.0616319	4.21699	3.68748	5.38249	-7.64968	5.79998	-0.126598	-5.67261	6.00769	-0.0414598	-1.00064	0	1.07318	0
K	63	G	PositiveCharge	Special	9.74	3.29	-6.45	146	75	-71	168.6	60.1	-108.5	127	-3.5	B	S	+	N	L	B	343.272	344.331	347.167	loop	interface	interface	0.338983	5	0	0	0	-1.84	2.98456	15.5853	0.217968	3.99828	7.27329	5.34287	-11.3252	10.3251	-0.206969	-7.53426	6.4462	-0.025138	-2.696	3.2e-14	1.04864	0.0245388
K	63	R	PositiveCharge	PositiveCharge	9.74	6.34	-3.4	146	174	28	168.6	173.4	4.8	26	0.6	B	B	+	+	L	L	343.272	344.331	347.167	loop	interface	interface	0.338983	5	0	0	0	0	0.60545	2.16835	-5.19157	-0.870733	-2.91792	-4.78959	5.01005	-0.099062	0.235868	2.70823	8.3938	0.540256	0.328095	0	-0.850978	0
K	63	T	PositiveCharge	Polar	9.74	5.6	-4.14	146	119	-27	168.6	116.1	-52.5	78	-3.2	B	S	+	P	L	L	343.272	344.331	347.167	loop	interface	interface	0.338983	5	0	0	0	5.97	2.63347	14.6239	-1.54547	2.63824	4.87049	5.3364	-6.84886	7.70274	-0.114324	-4.8015	6.00796	0.314676	-0.842561	3.11e-14	1.06351	2.46e-08
K	63	V	PositiveCharge	Hydrophobic	9.74	5.61	-4.13	146	117	-29	168.6	140	-28.6	97	-8.1	B	S	+	N	L	B	343.272	344.331	347.167	loop	interface	interface	0.338983	5	0	0	0	147.24	2.61188	13.2272	0.0473024	4.19672	2.85214	5.38421	-5.50098	3.91168	0.0557394	-5.59397	6.16198	0.639199	0.262557	0	1.07318	0
S	64	A	Polar	Hydrophobic	5.68	6	0.32	105	89	-16	89	88.6	-0.4	99	-2.6	S	S	P	N	L	B	340.469	339.821	341.426	loop	interface	interface	0.296774	1	0	0	0	-0.01	-0.924293	-4.45372	-3.41e-09	-7.82e-10	0.288419	9.44e-12	-1.6174	-1.35507	4.73e-05	-1.32139	-0.434798	-0.0135282	-0.648437	-2.93e-14	4.13e-12	-2.46e-08
S	64	C	Polar	Special	5.68	5.07	-0.61	105	121	16	89	108.5	19.5	112	-3.3	S	S	P	P	L	C	340.469	339.821	341.426	loop	interface	interface	0.296774	1	0	0	0	-0.14	-0.357061	-1.58016	-0.0130715	0	-1.36142	0	-0.895392	-3.50887	0.00161439	1.41067	2.81427	-0.0279648	0.634989	0	0	0
S	64	E	Polar	negativeCharge	5.68	3.22	-2.46	105	147	42	89	138.4	49.4	80	2.7	S	B	P	-	L	L	340.469	339.821	341.426	loop	interface	interface	0.296774	1	0	0	0	-1.08	-0.81593	-4.17065	-3.83004	-3.69779	-3.10474	0.409658	3.86405	-5.94432	0.0020009	6.2053	1.04599	0.0754822	1.94931	0	0.803762	0
S	64	F	Polar	Hydrophobic	5.68	3.32	-2.36	105	165	60	89	189.9	100.9	155	-3.6	S	B	P	N	L	B	340.469	339.821	341.426	loop	interface	interface	0.296774	1	0	0	0	0	-1.28988	-6.24598	-2.8211	-3.44721	-6.804	-2.33681	10.2355	-11.3279	0.783874	4.96568	4.3364	0.198816	0.983178	2.93e-14	-0.0291754	2.46e-08
S	64	G	Polar	Special	5.68	3.29	-2.39	105	75	-30	89	60.1	-28.9	56	-0.4	S	S	P	N	L	B	340.469	339.821	341.426	loop	interface	interface	0.296774	1	0	0	0	-0.01	0.244402	1.16823	0	0	2.66682	0	-3.81838	2.55026	-0.00280825	-1.78379	1.59155	-0.0354239	-1.9425	0	0	0
S	64	H	Polar	PositiveCharge	5.68	7.59	1.91	105	155	50	89	153.2	64.2	89	2.4	S	B	P	+	L	L	340.469	339.821	341.426	loop	interface	interface	0.296774	1	0	0	0	0.12	-0.0860931	-0.973727	-2.80049	-2.61855	-4.66949	-2.40825	9.98796	-7.18165	0.496457	3.71564	4.17024	0.170404	0.523544	2.93e-14	-0.511014	0.675032
S	64	I	Polar	Hydrophobic	5.68	6.02	0.34	105	131	26	89	166.7	77.7	142	-5.3	S	B	P	N	L	B	340.469	339.821	341.426	loop	interface	interface	0.296774	1	0	0	0	0	-1.48291	-7.21971	-0.319808	2.27e-13	-4.37997	-0.024287	1.86468	-9.70213	0.00659889	2.78175	2.54797	0.00548625	2.67701	0	0	0
S	64	L	Polar	Hydrophobic	5.68	9.71	4.03	105	131	26	89	166.7	77.7	145	-4.6	S	B	P	N	L	B	340.469	339.821	341.426	loop	interface	interface	0.296774	1	0	0	0	-0.02	-1.58851	-7.56539	-0.342244	0	-3.53877	-2.84e-14	0.869721	-8.20768	0.0186432	2.16641	1.31583	0.152698	2.33644	0	0	0
S	64	P	Polar	Special	5.68	6.3	0.62	105	115	10	89	112.7	23.7	74	0.8	S	P	P	N	L	P	340.469	339.821	341.426	loop	interface	interface	0.296774	1	0	0	0	0	-2.38898	-11.7155	-0.00550014	0	-1.64571	-0.00701489	-2.74948	-5.68418	3.66168	0.950274	-6.20061	-0.0349934	-5.41532	0	0	0
S	64	Q	Polar	Polar	5.68	6.24	0.56	105	146	41	89	143.8	54.8	68	2.7	S	B	P	P	L	L	340.469	339.821	341.426	loop	interface	interface	0.296774	1	0	0	0	-0.01	-1.00784	-4.78975	-2.71527	-2.53775	-3.27479	-8.53e-14	2.59159	-6.19291	0.0022208	4.76898	2.49832	0.0698707	2.2045	0	0	0
S	64	R	Polar	PositiveCharge	5.68	6.34	0.66	105	174	69	89	173.4	84.4	110	3.7	S	B	P	+	L	L	340.469	339.821	341.426	loop	interface	interface	0.296774	1	0	0	0	0.28	-1.3661	-6.8029	-0.122257	0	-2.79265	-0.921871	0.0735092	-6.4823	0.00241088	2.64062	1.30005	0.337624	1.07703	0	-0.83804	0
S	64	T	Polar	Polar	5.68	5.6	-0.08	105	119	14	89	116.1	27.1	58	-0.1	S	S	P	P	L	L	340.469	339.821	341.426	loop	interface	interface	0.296774	1	0	0	0	0	0.126239	0.329457	-0.00112798	0	-1.51609	-0.024707	1.72702	-3.29158	-0.0193569	0.870069	2.59029	-0.00507572	0.879783	0	0	0
S	64	V	Polar	Hydrophobic	5.68	5.61	-0.07	105	117	12	89	140	51	124	-5	S	S	P	N	L	B	340.469	339.821	341.426	loop	interface	interface	0.296774	1	0	0	0	0	-0.811851	-3.9189	-0.141468	7.93e-10	-2.94593	-0.0400108	1.4295	-6.7559	-0.00296459	1.66421	2.8614	0.012257	1.94559	2.93e-14	-3.3e-12	2.46e-08
S	64	W	Polar	Hydrophobic	5.68	5.89	0.21	105	204	99	89	227.8	138.8	177	0.1	S	B	P	N	L	B	340.469	339.821	341.426	loop	interface	interface	0.296774	1	0	0	0	0	-0.822056	-5.79963	-2.04729	-1.98148	-8.27876	-2.18041	11.3259	-13.2355	0.462037	5.2748	4.58589	0.309141	1.88693	2.93e-14	-0.0339377	2.46e-08
S	64	Y	Polar	Hydrophobic	5.68	5.66	-0.02	105	181	76	89	193.6	104.6	144	0.5	S	B	P	N	L	B	340.469	339.821	341.426	loop	interface	interface	0.296774	1	0	0	0	-0.02	-1.15342	-4.90881	-1.1038	-3.03046	-6.03211	-1.98811	8.60712	-10.1219	0.462651	4.75707	3.44175	0.138991	1.02675	2.93e-14	-0.0400002	2.46e-08
L	65	A	Hydrophobic	Hydrophobic	9.71	6	-3.71	131	89	-42	166.7	88.6	-78.1	96	2	B	S	N	N	B	B	338.323	337.911	340.093	loop	interface	interface	0.41791	2	0	0	0	0	1.22629	5.48644	3.42e-09	7.93e-10	4.31892	6.03e-12	-2.69014	7.55436	0.0328998	-3.72575	0.0446499	-0.0484869	-2.26902	3.02e-14	-3.31e-12	2.46e-08
L	65	C	Hydrophobic	Special	9.71	5.07	-4.64	131	121	-10	166.7	108.5	-58.2	198	1.3	B	S	N	P	B	C	338.323	337.911	340.093	loop	interface	interface	0.41791	2	0	0	0	-0.01	1.43107	7.16324	-0.270415	-0.345415	2.22559	0	-1.46977	5.05369	-0.00274303	-0.940381	2.53884	0.373846	-1.39374	0	0	0
L	65	D	Hydrophobic	negativeCharge	9.71	5.05	-4.66	131	133	2	166.7	111.1	-55.6	172	7.3	B	S	N	-	B	L	338.323	337.911	340.093	loop	interface	interface	0.41791	2	0	0	0	0	1.47024	6.81221	-0.000213961	-2.47941	2.4307	1.15256	0.426812	5.30644	0.0401233	-0.811889	0.0123471	-0.0327514	-1.57157	3.02e-14	0.767483	2.46e-08
L	65	E	Hydrophobic	negativeCharge	9.71	3.22	-6.49	131	147	16	166.7	138.4	-28.3	138	7.3	B	B	N	-	B	L	338.323	337.911	340.093	loop	interface	interface	0.41791	2	0	0	0	0	0.980956	4.7596	-7.61e-05	-3.53178	1.47764	1.21816	0.108248	3.40315	-0.0106983	1.18558	0.150381	-0.0566106	-0.952365	3.02e-14	0.815613	2.46e-08
L	65	F	Hydrophobic	Hydrophobic	9.71	3.32	-6.39	131	165	34	166.7	189.9	23.2	22	1	B	B	N	N	B	B	338.323	337.911	340.093	loop	interface	interface	0.41791	2	0	0	0	-0.01	0.20392	1.166	3.42e-09	7.95e-10	-0.0318254	4.75e-12	-0.529785	0.490675	-0.0134257	0.510886	0.728251	0.0112258	-0.123278	3.02e-14	-2.95e-12	2.46e-08
L	65	G	Hydrophobic	Special	9.71	3.29	-6.42	131	75	-56	166.7	60.1	-106.6	138	4.2	B	S	N	N	B	B	338.323	337.911	340.093	loop	interface	interface	0.41791	2	0	0	0	0	1.32074	6.22505	3.42e-09	7.96e-10	5.24529	4.43e-12	-3.37171	8.9681	0.225116	-3.57116	-1.23542	-0.0351707	-2.88391	3.02e-14	-2.97e-12	2.46e-08
L	65	H	Hydrophobic	PositiveCharge	9.71	7.59	-2.12	131	155	24	166.7	153.2	-13.5	99	7	B	B	N	+	B	L	338.323	337.911	340.093	loop	interface	interface	0.41791	2	0	0	0	0.12	1.03837	5.48524	0	-1.9737	1.05379	2.27e-13	0.917228	3.29506	0.00511701	0.823044	1.11182	0.00897422	-0.65673	0	2.49e-14	0.243912
L	65	I	Hydrophobic	Hydrophobic	9.71	6.02	-3.69	131	131	0	166.7	166.7	0	5	-0.7	B	B	N	N	B	B	338.323	337.911	340.093	loop	interface	interface	0.41791	2	0	0	0	0	1.5652	7.31128	0	0	-2.84941	0	3.62449	-4.25876	4.97267	1.13723	3.69208	0.993002	0.977059	0	0	0
L	65	K	Hydrophobic	PositiveCharge	9.71	9.74	0.03	131	146	15	166.7	168.6	1.9	107	7.7	B	B	N	+	B	L	338.323	337.911	340.093	loop	interface	interface	0.41791	2	0	0	0	1.36	0.14675	0.914574	0	-2.27e-13	0.984414	-0.665437	-0.932364	1.81246	0.0167803	-0.129193	0.281896	0.000700287	-0.70983	0	-0.454681	0
L	65	M	Hydrophobic	Hydrophobic	9.71	5.74	-3.97	131	149	18	166.7	162.9	-3.8	15	1.9	B	B	N	N	B	B	338.323	337.911	340.093	loop	interface	interface	0.41791	2	0	0	0	0	0.444944	2.09475	-0.0382782	0	0.0672923	0	-0.289629	0.60988	0.00710251	-0.219404	1.97374	-0.01595	-0.469449	0	0	0
L	65	N	Hydrophobic	Polar	9.71	5.47	-4.24	131	132	1	166.7	114.1	-52.6	153	7.3	B	S	N	P	B	L	338.323	337.911	340.093	loop	interface	interface	0.41791	2	0	0	0	0	1.02164	5.59189	3.42e-09	-0.925341	2.27142	6.28e-12	-0.28605	5.02894	0.0159556	-1.10669	0.634279	-0.0406164	-1.4369	3.02e-14	-3.13e-12	2.46e-08
L	65	P	Hydrophobic	Special	9.71	6.3	-3.41	131	115	-16	166.7	112.7	-54	98	5.4	B	P	N	N	B	P	338.323	337.911	340.093	loop	interface	interface	0.41791	2	0	0	0	0	3.66682	17.7207	5.6899	7.95e-10	1.05009	4.75e-12	-0.417797	2.23434	13.8029	-1.02818	-4.7781	1.1675	-7.35663	3.02e-14	-2.96e-12	2.46e-08
L	65	Q	Hydrophobic	Polar	9.71	6.24	-3.47	131	146	15	166.7	143.8	-22.9	113	7.3	B	B	N	P	B	L	338.323	337.911	340.093	loop	interface	interface	0.41791	2	0	0	0	0	0.499212	3.03207	0	-2.526	1.65419	0	-0.614155	3.61275	-0.0069536	0.809344	0.120795	-0.0179026	-0.854136	0	0	0
L	65	R	Hydrophobic	PositiveCharge	9.71	6.34	-3.37	131	174	43	166.7	173.4	6.7	102	8.3	B	B	N	+	B	L	338.323	337.911	340.093	loop	interface	interface	0.41791	2	0	0	0	1.36	0.19355	1.33467	0	0	0.77869	-1.22553	-0.629878	2.25715	-0.00592876	0.238507	0.381484	0.30964	-1.13275	0	-0.769455	0
L	65	S	Hydrophobic	Polar	9.71	5.68	-4.03	131	105	-26	166.7	89	-77.7	145	4.6	B	S	N	P	B	L	338.323	337.911	340.093	loop	interface	interface	0.41791	2	0	0	0	0	0.977118	4.26738	-2.93502	-3.12252	2.53193	4.75e-12	1.39652	7.09801	-0.0119801	-0.59619	-0.218143	0.124769	-1.35354	3.02e-14	-2.97e-12	2.46e-08
L	65	T	Hydrophobic	Polar	9.71	5.6	-4.11	131	119	-12	166.7	116.1	-50.6	92	4.5	B	S	N	P	B	L	338.323	337.911	340.093	loop	interface	interface	0.41791	2	0	0	0	0	1.16497	5.9111	-2.58286	-2.77036	0.950592	4.75e-12	3.12631	4.18431	-0.00872119	-0.165137	2.69611	0.480861	-0.528586	3.02e-14	-2.97e-12	2.46e-08
L	65	V	Hydrophobic	Hydrophobic	9.71	5.61	-4.1	131	117	-14	166.7	140	-26.7	32	-0.4	B	S	N	N	B	B	338.323	337.911	340.093	loop	interface	interface	0.41791	2	0	0	0	0	1.61741	8.35979	0	0	-0.679393	0	1.83102	-0.262878	4.56701	-0.469257	3.1577	0.21558	0.62777	0	0	0
L	65	Y	Hydrophobic	Hydrophobic	9.71	5.66	-4.05	131	181	50	166.7	193.6	26.9	36	5.1	B	B	N	N	B	B	338.323	337.911	340.093	loop	interface	interface	0.41791	2	0	0	0	-0.01	0.27029	1.45015	3.42e-09	7.95e-10	0.675931	4.75e-12	-1.07853	1.58775	-0.0107381	-0.0581421	0.359706	-0.0258357	-0.558634	3.02e-14	-2.99e-12	2.46e-08
P	66	A	Special	Hydrophobic	6.3	6	-0.3	115	89	-26	112.7	88.6	-24.1	27	-3.4	P	S	N	N	P	B	338.416	337.626	338.916	loop	interface	interface	0.345912	3	0	0	0	-0.03	1.17411	5.6709	0	0	1.52512	0	0.585433	3.05408	-0.0179101	-1.82388	2.35731	-0.00925403	-0.496593	0	0	0
P	66	C	Special	Special	6.3	5.07	-1.23	115	121	6	112.7	108.5	-4.2	169	-4.1	P	S	N	P	P	C	338.416	337.626	338.916	loop	interface	interface	0.345912	3	0	0	0	-0.01	1.73382	7.56788	0	0	-0.62537	0	2.48414	0.868616	0.0172999	0.477451	3.91649	0.429254	-0.233881	0	0	0
P	66	D	Special	negativeCharge	6.3	5.05	-1.25	115	133	18	112.7	111.1	-1.6	108	1.9	P	S	N	-	P	L	338.416	337.626	338.916	loop	interface	interface	0.345912	3	0	0	0	-0.03	3.91977	18.2806	0.483854	-1.22496	-1.13658	1.69845	8.58438	0.77436	0.069807	0.250937	4.01207	4.15596	-0.0286372	3.02e-14	0.612284	2.46e-08
P	66	E	Special	negativeCharge	6.3	3.22	-3.08	115	147	32	112.7	138.4	25.7	93	1.9	P	B	N	-	P	L	338.416	337.626	338.916	loop	interface	interface	0.345912	3	0	0	0	1.23	1.82028	6.82846	-2.6214	-5.82674	-1.53828	1.29929	5.32972	-1.35058	-0.0182184	4.98103	4.83859	1.12229	-0.323993	3.02e-14	0.612764	2.46e-08
P	66	G	Special	Special	6.3	3.29	-3.01	115	75	-40	112.7	60.1	-52.6	42	-1.2	P	S	N	N	P	B	338.416	337.626	338.916	loop	interface	interface	0.345912	3	0	0	0	-0.01	2.06395	10.5989	0	0.000651854	3.61636	0	-1.12755	6.52472	-0.0208677	-2.17908	3.84428	-0.0596382	-1.03381	0	0	0
P	66	I	Special	Hydrophobic	6.3	6.02	-0.28	115	131	16	112.7	166.7	54	95	-6.1	P	B	N	N	P	B	338.416	337.626	338.916	loop	interface	interface	0.345912	3	0	0	0	8.85	1.11466	5.31754	-0.079683	-0.00377367	-4.3125	2.84e-14	5.96331	-6.48693	4.51677	2.22093	3.14023	0.359194	0.127983	0	0	0
P	66	K	Special	PositiveCharge	6.3	9.74	3.44	115	146	31	112.7	168.6	55.9	103	2.3	P	B	N	+	P	L	338.416	337.626	338.916	loop	interface	interface	0.345912	3	0	0	0	1.34	0.856416	4.51503	0	0	-2.50265	-0.717535	4.15389	-2.94142	-0.00662319	1.67441	4.31928	0.859334	-0.166878	0	-0.323662	0
P	66	L	Special	Hydrophobic	6.3	9.71	3.41	115	131	16	112.7	166.7	54	98	-5.4	P	B	N	N	P	B	338.416	337.626	338.916	loop	interface	interface	0.345912	3	0	0	0	3.5	1.14272	5.56248	0	0	-2.72116	0	4.22338	-3.98067	-0.00338141	1.45012	2.47466	4.11953	-0.0368654	0	0	0
P	66	M	Special	Hydrophobic	6.3	5.74	-0.56	115	149	34	112.7	162.9	50.2	87	-3.5	P	B	N	N	P	B	338.416	337.626	338.916	loop	interface	interface	0.345912	3	0	0	0	0.56	0.864096	3.89866	-0.190275	-0.0882209	-4.09948	-0.00498432	6.37872	-4.94041	0.0455882	1.75372	3.69162	1.35237	0.199606	3.02e-14	-4.14e-12	2.46e-08
P	66	N	Special	Polar	6.3	5.47	-0.83	115	132	17	112.7	114.1	1.4	91	1.9	P	S	N	P	P	L	338.416	337.626	338.916	loop	interface	interface	0.345912	3	0	0	0	-0.02	2.61521	15.0788	-1.22808	-1.26558	-2.1095	-0.00261408	8.02985	0.199561	1.32293	1.22326	4.72207	4.18687	0.132032	3.02e-14	-3.01e-12	2.46e-08
P	66	Q	Special	Polar	6.3	6.24	-0.06	115	146	31	112.7	143.8	31.1	76	1.9	P	B	N	P	P	L	338.416	337.626	338.916	loop	interface	interface	0.345912	3	0	0	0	-0.01	1.743	7.68438	-1.63509	-1.67259	-2.70233	0	5.94389	-2.04112	0.0108085	2.96603	4.94022	1.87456	-0.0468281	0	0	0
P	66	R	Special	PositiveCharge	6.3	6.34	0.04	115	174	59	112.7	173.4	60.7	103	2.9	P	B	N	+	P	L	338.416	337.626	338.916	loop	interface	interface	0.345912	3	0	0	0	1.34	1.20223	5.40499	-1.62252	-1.4645	-3.7735	-1.45341	7.15857	-3.06541	0.0146183	4.6264	3.42602	2.09621	-0.0243694	0	-0.537485	0
P	66	S	Special	Polar	6.3	5.68	-0.62	115	105	-10	112.7	89	-23.7	74	-0.8	P	S	N	P	P	L	338.416	337.626	338.916	loop	interface	interface	0.345912	3	0	0	0	-0.01	2.40729	11.778	3.45e-09	8.15e-10	0.935277	5.12e-12	2.93205	3.9969	0.301298	-0.610591	2.51015	1.71289	-0.43828	3.02e-14	-4.12e-12	2.46e-08
P	66	T	Special	Polar	6.3	5.6	-0.7	115	119	4	112.7	116.1	3.4	38	-0.9	P	S	N	P	P	L	338.416	337.626	338.916	loop	interface	interface	0.345912	3	0	0	0	-0.01	1.84799	9.63389	-0.93447	-0.864895	0.892654	5.12e-12	1.86898	1.74558	4.35596	-0.356741	2.78974	0.137082	-0.824642	3.02e-14	-4.13e-12	2.46e-08
P	66	V	Special	Hydrophobic	6.3	5.61	-0.69	115	117	2	112.7	140	27.3	68	-5.8	P	S	N	N	P	B	338.416	337.626	338.916	loop	interface	interface	0.345912	3	0	0	0	9.34	1.29288	6.67319	3.45e-09	8.16e-10	-2.71055	5.23e-12	4.26727	-3.75673	4.41225	1.21413	3.21558	0.0312383	-0.055555	3.02e-14	-4.06e-12	2.46e-08
P	66	Y	Special	Hydrophobic	6.3	5.66	-0.64	115	181	66	112.7	193.6	80.9	110	-0.3	P	B	N	N	P	B	338.416	337.626	338.916	loop	interface	interface	0.345912	3	0	0	0	1.65	4.25909	8.4612	0.124936	-2.27457	-3.24003	0.0193113	2.72693	-4.97943	0.393821	3.40067	4.81409	7.40946	-0.336824	3.02e-14	0.0660186	2.46e-08
A	67	D	Hydrophobic	negativeCharge	6	5.05	-0.95	89	133	44	88.6	111.1	22.5	126	5.3	S	S	N	-	B	L	340.546	340.394	341.954	loop	interface	interface	0.131783	3	0	0	0	0	2.58231	11.777	-1.59589	-0.512353	-4.26462	-7.65239	20.7154	-2.65114	3.12508	1.98233	1.48222	0.451703	0.777374	3.02e-14	-2.03429	2.73099
A	67	E	Hydrophobic	negativeCharge	6	3.22	-2.78	89	147	58	88.6	138.4	49.8	107	5.3	S	B	N	-	B	L	340.546	340.394	341.954	loop	interface	interface	0.131783	3	0	0	0	0	4.70565	24.5913	0.796695	2.02955	-7.49331	-8.06953	23.2514	-7.58451	7.29821	6.19473	2.22812	5.28569	1.74026	3.02e-14	-2.11971	2.774
A	67	G	Hydrophobic	Special	6	3.29	-2.71	89	75	-14	88.6	60.1	-28.5	60	2.2	S	S	N	N	B	B	340.546	340.394	341.954	loop	interface	interface	0.131783	3	0	0	0	0	1.68905	7.82225	0.284868	0.00561973	3.41114	0	-2.91535	5.67875	-0.367425	-0.493452	2.22146	-0.00334642	-0.351689	0	0	0
A	67	H	Hydrophobic	PositiveCharge	6	7.59	1.59	89	155	66	88.6	153.2	64.6	86	5	S	B	N	+	B	L	340.546	340.394	341.954	loop	interface	interface	0.131783	3	0	0	0	0.12	7.9171	40.2873	-0.968566	-0.446949	-10.2035	2.84e-13	15.3493	-10.7796	37.3952	5.37502	3.78423	0.00738113	1.48763	0	7.11e-14	0.774707
A	67	I	Hydrophobic	Hydrophobic	6	6.02	0.02	89	131	42	88.6	166.7	78.1	94	-2.7	S	B	N	N	B	B	340.546	340.394	341.954	loop	interface	interface	0.131783	3	0	0	0	0	2.2262	10.5035	-0.578582	-0.126188	-8.63244	-0.00931078	7.52331	-14.3977	12.9666	5.72954	3.4985	4.52604	1.90046	2.93e-14	-4.16e-12	0.0037172
A	67	L	Hydrophobic	Hydrophobic	6	9.71	3.71	89	131	42	88.6	166.7	78.1	96	-2	S	B	N	N	B	B	340.546	340.394	341.954	loop	interface	interface	0.131783	3	0	0	0	0	1.66605	9.67135	1.85077	1.91134	-8.53131	1.28e-11	10.2748	-13.134	8.23553	5.66202	2.55089	0.833965	1.95649	2.93e-14	-4.16e-12	0.0172706
A	67	N	Hydrophobic	Polar	6	5.47	-0.53	89	132	43	88.6	114.1	25.5	111	5.3	S	S	N	P	B	L	340.546	340.394	341.954	loop	interface	interface	0.131783	3	0	0	0	0	3.18067	15.3674	-0.453839	-0.536726	-5.46808	8.92e-06	13.0648	-3.08512	-1.7612	4.07447	3.01628	6.5094	1.34131	2.93e-14	-4.11e-12	0.00748649
A	67	P	Hydrophobic	Special	6	6.3	0.3	89	115	26	88.6	112.7	24.1	27	3.4	S	P	N	N	B	P	340.546	340.394	341.954	loop	interface	interface	0.131783	3	0	0	0	0	-1.36003	-5.22344	1.14085	1.33855	-1.55648	2.63e-11	-3.1643	-5.60585	7.92636	-0.129316	-5.32036	0.147118	-3.58075	2.93e-14	-2.81e-12	2.46e-08
A	67	Q	Hydrophobic	Polar	6	6.24	0.24	89	146	57	88.6	143.8	55.2	91	5.3	S	B	N	P	B	L	340.546	340.394	341.954	loop	interface	interface	0.131783	3	0	0	0	0	4.14428	19.2316	0.0462767	-0.576549	-8.60899	0.00291714	14.0812	-8.32943	6.00627	8.1272	3.80891	4.65784	2.09352	2.93e-14	-2.8e-12	0.0159388
A	67	R	Hydrophobic	PositiveCharge	6	6.34	0.34	89	174	85	88.6	173.4	84.8	112	6.3	S	B	N	+	B	L	340.546	340.394	341.954	loop	interface	interface	0.131783	3	0	0	0	1.36	2.99247	19.9615	-1.12062	-4.74123	-14.9638	-3.80204	25.5907	-12.3825	15.5189	10.6503	4.95473	0.998001	4.09776	3.02e-14	-0.823429	0.0824901
A	67	S	Hydrophobic	Polar	6	5.68	-0.32	89	105	16	88.6	89	0.4	99	2.6	S	S	N	P	B	L	340.546	340.394	341.954	loop	interface	interface	0.131783	3	0	0	0	0	0.578882	2.48188	-0.0813503	-5.67356	-0.918615	2.65e-11	3.94744	1.95906	0.126589	2.69733	0.42294	-0.000830747	0.280608	2.93e-14	-2.77e-12	0.0028765
A	67	T	Hydrophobic	Polar	6	5.6	-0.4	89	119	30	88.6	116.1	27.5	58	2.5	S	S	N	P	B	L	340.546	340.394	341.954	loop	interface	interface	0.131783	3	0	0	0	0	1.32497	5.44233	-0.240553	-5.47777	-3.48065	2.6e-11	5.91005	-3.59042	5.44605	3.19951	2.21696	1.46065	0.633737	2.93e-14	-2.75e-12	-0.00150569
A	67	V	Hydrophobic	Hydrophobic	6	5.61	-0.39	89	117	28	88.6	140	51.4	64	-2.4	S	S	N	N	B	B	340.546	340.394	341.954	loop	interface	interface	0.131783	3	0	0	0	0	1.41879	8.97485	0.106661	0.38163	-5.58811	-0.00338158	5.71728	-9.1892	9.03939	2.4938	3.00275	3.03916	1.27482	2.93e-14	-2.74e-12	-0.0251203
A	67	Y	Hydrophobic	Hydrophobic	6	5.66	-0.34	89	181	92	88.6	193.6	105	112	3.1	S	B	N	N	B	B	340.546	340.394	341.954	loop	interface	interface	0.131783	3	0	0	0	0	2.5915	16.8762	0.625482	-0.563052	-13.3329	0.00123044	15.7451	-15.938	18.3911	4.79503	5.21218	1.8709	2.19134	2.93e-14	-0.00610268	0.0751841
L	68	A	Hydrophobic	Hydrophobic	9.71	6	-3.71	131	89	-42	166.7	88.6	-78.1	96	2	B	S	N	N	B	B	337.916	338.587	340.405	loop	interface	interface	0.00995025	6	0	0	0	0	2.07267	9.41107	0.39286	0.55281	9.41471	0.733452	-8.43924	14.596	-0.7402	-5.41048	-1.42014	-0.268688	-1.2531	3.02e-14	-2.55e-12	2.46e-08
L	68	C	Hydrophobic	Special	9.71	5.07	-4.64	131	121	-10	166.7	108.5	-58.2	198	1.3	B	S	N	P	B	C	337.916	338.587	340.405	loop	interface	interface	0.00995025	6	0	0	0	0	1.84708	7.65476	0.419224	0.647888	8.14555	0.527446	-8.84737	13.0159	-0.421561	-3.3573	-2.27217	-0.202843	-1.3538	3.02e-14	-1.4e-12	2.46e-08
L	68	E	Hydrophobic	negativeCharge	9.71	3.22	-6.49	131	147	16	166.7	138.4	-28.3	138	7.3	B	B	N	-	B	L	337.916	338.587	340.405	loop	interface	interface	0.00995025	6	0	0	0	0	2.89229	11.7492	-0.00517749	-2.25924	2.1206	-5.15521	9.4038	7.95379	-0.0849777	1.73728	-1.49393	-0.216083	-0.620652	0	-0.251623	0
L	68	G	Hydrophobic	Special	9.71	3.29	-6.42	131	75	-56	166.7	60.1	-106.6	138	4.2	B	S	N	N	B	B	337.916	338.587	340.405	loop	interface	interface	0.00995025	6	0	0	0	0	3.31971	15.9328	-0.811945	-0.587558	11.725	0.95875	-10.6492	18.9739	1.18173	-5.77392	1.61819	-0.710038	-1.24287	3.02e-14	0.00783582	2.46e-08
L	68	I	Hydrophobic	Hydrophobic	9.71	6.02	-3.69	131	131	0	166.7	166.7	0	5	-0.7	B	B	N	N	B	B	337.916	338.587	340.405	loop	interface	interface	0.00995025	6	0	0	0	0	0.329182	1.35389	0.273157	0.367346	-1.63214	0.0504483	1.01113	-2.992	0.617905	0.388587	0.456883	2.81257	0.993212	3.02e-14	-2.86e-12	2.46e-08
L	68	M	Hydrophobic	Hydrophobic	9.71	5.74	-3.97	131	149	18	166.7	162.9	-3.8	15	1.9	B	B	N	N	B	B	337.916	338.587	340.405	loop	interface	interface	0.00995025	6	0	0	0	0	-0.199698	-1.69072	0.409633	0.233377	0.127056	-0.100917	-1.99226	0.680894	-0.0184019	0.358185	-1.22259	-0.165694	-0.889854	3.02e-14	-4.35e-12	2.46e-08
L	68	N	Hydrophobic	Polar	9.71	5.47	-4.24	131	132	1	166.7	114.1	-52.6	153	7.3	B	S	N	P	B	L	337.916	338.587	340.405	loop	interface	interface	0.00995025	6	0	0	0	0	2.72058	14.6926	1.45951	0.219572	5.50414	0.399494	-1.11414	11.671	-0.372699	-1.99985	0.248214	-1.3216	-1.20185	3.02e-14	-0.000991372	2.46e-08
L	68	P	Hydrophobic	Special	9.71	6.3	-3.41	131	115	-16	166.7	112.7	-54	98	5.4	B	P	N	N	B	P	337.916	338.587	340.405	loop	interface	interface	0.00995025	6	0	0	0	0	3.76756	19.8419	0.621298	0.680793	5.86188	0.702374	-7.48317	8.32461	9.2484	-4.3209	6.23421	-0.0121964	-4.18953	3.02e-14	-0.015432	2.46e-08
L	68	Q	Hydrophobic	Polar	9.71	6.24	-3.47	131	146	15	166.7	143.8	-22.9	113	7.3	B	B	N	P	B	L	337.916	338.587	340.405	loop	interface	interface	0.00995025	6	0	0	0	0	1.72739	10.1657	-1.41149	-2.97185	1.13502	0.0621653	4.51894	7.02813	0.176599	2.19835	-0.437579	-0.132549	-0.526657	0	0	0
L	68	R	Hydrophobic	PositiveCharge	9.71	6.34	-3.37	131	174	43	166.7	173.4	6.7	102	8.3	B	B	N	+	B	L	337.916	338.587	340.405	loop	interface	interface	0.00995025	6	0	0	0	1.36	2.69922	12.1322	-3.7499	-10.6125	-3.66318	-4.43674	15.4934	5.1366	8.00662	4.32303	0.631293	1.27401	1.11006	3.02e-14	-0.270478	2.46e-08
L	68	S	Hydrophobic	Polar	9.71	5.68	-4.03	131	105	-26	166.7	89	-77.7	145	4.6	B	S	N	P	B	L	337.916	338.587	340.405	loop	interface	interface	0.00995025	6	0	0	0	0	2.64644	12.4021	0.167391	-2.27232	7.36743	0.697802	-3.14591	15.1303	-0.597071	-2.34676	-2.22308	-0.375646	-0.626705	0	0	0
L	68	T	Hydrophobic	Polar	9.71	5.6	-4.11	131	119	-12	166.7	116.1	-50.6	92	4.5	B	S	N	P	B	L	337.916	338.587	340.405	loop	interface	interface	0.00995025	6	0	0	0	0	1.65837	7.68646	0.48788	-2.35988	4.96427	0.448373	-0.976105	10.563	-0.493634	-2.2476	-2.40913	-0.290755	-0.772783	0	3.55e-15	0
L	68	V	Hydrophobic	Hydrophobic	9.71	5.61	-4.1	131	117	-14	166.7	140	-26.7	32	-0.4	B	S	N	N	B	B	337.916	338.587	340.405	loop	interface	interface	0.00995025	6	0	0	0	0	0.374842	-0.419241	-1.01721	2.47281	2.78739	0.14368	-4.22644	3.9969	-0.26418	-2.25814	-1.92571	-0.128344	-1.09727	3.02e-14	-7.19e-12	2.46e-08
L	68	Y	Hydrophobic	Hydrophobic	9.71	5.66	-4.05	131	181	50	166.7	193.6	26.9	36	5.1	B	B	N	N	B	B	337.916	338.587	340.405	loop	interface	interface	0.00995025	6	0	0	0	0	3.41917	16.0529	-0.267861	-0.262201	-3.49799	0.638047	6.31032	-1.16788	16.3779	-0.779985	-1.24084	-0.0565544	-0.351175	0	0	0
N	69	A	Polar	Hydrophobic	5.47	6	0.53	132	89	-43	114.1	88.6	-25.5	111	-5.3	S	S	P	N	L	B	334.167	333.693	335.5	loop	interface	interface	0.574359	3	0	0	0	0	0.159785	1.35582	2.94297	2.94297	2.67151	0.0191024	-7.27657	1.75444	0.2505	-3.43046	1.54327	-0.0619179	-0.694675	0	0	0
N	69	C	Polar	Special	5.47	5.07	-0.4	132	121	-11	114.1	108.5	-5.6	139	-6	S	S	P	P	L	C	334.167	333.693	335.5	loop	interface	interface	0.574359	3	0	0	0	0	0.127023	0.868361	2.83797	2.80047	0.863314	0.003971	-3.6311	0.0641957	0.00879258	-2.08	-0.0220605	0.0228129	-0.0715981	0	7.11e-15	0
N	69	E	Polar	negativeCharge	5.47	3.22	-2.25	132	147	15	114.1	138.4	24.3	42	0	S	B	P	-	L	L	334.167	333.693	335.5	loop	interface	interface	0.574359	3	0	0	0	0	0.078676	0.125763	2.94297	2.94297	0.758594	0.279345	-4.72212	-1.15305	0.142786	-2.45932	1.04262	-0.0411943	-0.615288	3.02e-14	0.392147	2.46e-08
N	69	F	Polar	Hydrophobic	5.47	3.32	-2.15	132	165	33	114.1	189.9	75.8	158	-6.3	S	B	P	N	L	B	334.167	333.693	335.5	loop	interface	interface	0.574359	3	0	0	0	0	0.0645735	0.859671	2.943	2.943	0.702821	-2.50315	-2.97181	-0.949437	0.0217717	-0.0133853	0.749805	-0.0629585	-0.753541	0	0	0
N	69	G	Polar	Special	5.47	3.29	-2.18	132	75	-57	114.1	60.1	-54	80	-3.1	S	S	P	N	L	B	334.167	333.693	335.5	loop	interface	interface	0.574359	3	0	0	0	0	-0.391776	-1.18057	2.94315	2.94315	3.83287	0.0102212	-10.9065	2.97224	-0.0376451	-3.45783	0.550463	-0.0307136	-0.941422	0	0	0
N	69	I	Polar	Hydrophobic	5.47	6.02	0.55	132	131	-1	114.1	166.7	52.6	149	-8	S	B	P	N	L	B	334.167	333.693	335.5	loop	interface	interface	0.574359	3	0	0	0	0	-0.0651821	1.64935	2.68326	2.72076	-1.56212	-0.0133791	1.86292	-3.8916	0.692527	-1.46704	-0.172501	0.796515	0.306405	0	7.11e-15	0
N	69	L	Polar	Hydrophobic	5.47	9.71	4.24	132	131	-1	114.1	166.7	52.6	153	-7.3	S	B	P	N	L	B	334.167	333.693	335.5	loop	interface	interface	0.574359	3	0	0	0	0	-0.332181	-0.482101	2.86604	2.94298	-0.487935	0.00876787	-1.96347	-2.98785	0.0320306	-1.80558	0.981804	-0.0688922	-0.514746	0	0	0
N	69	P	Polar	Special	5.47	6.3	0.83	132	115	-17	114.1	112.7	-1.4	91	-1.9	S	P	P	N	L	P	334.167	333.693	335.5	loop	interface	interface	0.574359	3	0	0	0	0	-1.36189	-6.12919	2.94297	2.93347	-0.574415	-0.0290238	-4.61472	-3.6791	1.14161	-2.12655	-2.16112	0.0376779	0.675539	0	0	0
N	69	Q	Polar	Polar	5.47	6.24	0.77	132	146	14	114.1	143.8	29.7	46	0	S	B	P	P	L	L	334.167	333.693	335.5	loop	interface	interface	0.574359	3	0	0	0	0	-0.601127	-1.71908	2.8872	-4.3627	-1.14313	-0.064578	1.45293	-2.05991	-0.00507257	2.05069	-0.692333	0.221422	0.259492	-3.02e-14	-0.00360678	-2.46e-08
N	69	R	Polar	PositiveCharge	5.47	6.34	0.87	132	174	42	114.1	173.4	59.3	86	1	S	B	P	+	L	L	334.167	333.693	335.5	loop	interface	interface	0.574359	3	0	0	0	1.36	-0.678634	-1.77879	2.89979	2.93247	-0.40574	-0.40188	-3.67904	-2.7345	0.0166492	-1.03281	0.965595	0.287989	-0.562413	3.02e-14	-0.627318	2.46e-08
N	69	S	Polar	Polar	5.47	5.68	0.21	132	105	-27	114.1	89	-25.1	46	-2.7	S	S	P	P	L	L	334.167	333.693	335.5	loop	interface	interface	0.574359	3	0	0	0	0	-0.227254	-0.456142	0.720431	0.532931	2.126	0.0304834	-6.02669	1.7332	-0.00454987	-0.764056	1.25172	-0.0556068	-0.65914	0	0	0
N	69	T	Polar	Polar	5.47	5.6	0.13	132	119	-13	114.1	116.1	2	65	-2.8	S	S	P	P	L	L	334.167	333.693	335.5	loop	interface	interface	0.574359	3	0	0	0	0	0.272038	1.64474	2.4652	2.4652	1.1175	0.0124933	-2.21467	0.469078	-0.0307266	-2.41425	-0.320205	0.0951315	-0.0370885	0	0	0
N	69	V	Polar	Hydrophobic	5.47	5.61	0.14	132	117	-15	114.1	140	25.9	133	-7.7	S	S	P	N	L	B	334.167	333.693	335.5	loop	interface	interface	0.574359	3	0	0	0	0	0.42662	2.04178	2.94297	2.94297	0.342809	0.00851867	-1.07724	-0.985134	0.287894	-2.46747	-0.338328	0.384788	0.142355	0	0	0
N	69	W	Polar	Hydrophobic	5.47	5.89	0.42	132	204	72	114.1	227.8	113.7	174	-2.6	S	B	P	N	L	B	334.167	333.693	335.5	loop	interface	interface	0.574359	3	0	0	0	0	-0.0306402	-0.149883	2.79658	2.85995	-0.466375	-0.0249569	-2.14015	-2.63294	0.286108	-1.82792	1.06129	-0.0621579	-0.641051	-3.02e-14	0.000688133	-2.46e-08
G	77	A	Special	Hydrophobic	3.29	6	2.71	75	89	14	60.1	88.6	28.5	60	-2.2	S	S	N	N	B	B	325.255	325.738	326.48	loop	interface	interface	1.35577	2	0	0	0	0	0.0370287	0.204933	0	0	0.0549245	2.84e-14	-0.122372	0.0354756	0	0	0.00500723	0.231898	0	0	0	0
G	77	C	Special	Special	3.29	5.07	1.78	75	121	46	60.1	108.5	48.4	159	-2.9	S	S	N	P	B	C	325.255	325.738	326.48	loop	interface	interface	1.35577	2	0	0	0	0	0.0634205	0.32696	0	0	0.0549245	0	-0.122372	0.0354756	0	0.121465	0.00556832	0.231898	0	0	0	0
G	77	D	Special	negativeCharge	3.29	5.05	1.76	75	133	58	60.1	111.1	51	94	3.1	S	S	N	-	B	L	325.255	325.738	326.48	loop	interface	interface	1.35577	2	0	0	0	0	0.135484	0.721672	0	0	0.0498438	0.276472	-0.122372	0.0238075	0	0.00963915	0.0662118	0.23312	0	0	0.18495	0
G	77	E	Special	negativeCharge	3.29	3.22	-0.07	75	147	72	60.1	138.4	78.3	98	3.1	S	B	N	-	B	L	325.255	325.738	326.48	loop	interface	interface	1.35577	2	0	0	0	0	0.101029	0.509812	0	0	0.0549245	0.160195	-0.122372	0.0354756	0	0.0503098	-0.00808834	0.231902	0	0	0.107465	0
G	77	F	Special	Hydrophobic	3.29	3.32	0.03	75	165	90	60.1	189.9	129.8	153	-3.2	S	B	N	N	B	B	325.255	325.738	326.48	loop	interface	interface	1.35577	2	0	0	0	0	0.320143	1.60517	0	0	-0.0220064	1.21264	-0.122372	-0.132082	0	0.202714	0.465807	0.0004732	0	0	0	0
G	77	H	Special	PositiveCharge	3.29	7.59	4.3	75	155	80	60.1	153.2	93.1	98	2.8	S	B	N	+	B	L	325.255	325.738	326.48	loop	interface	interface	1.35577	2	0	0	0	0.12	0.112203	0.557395	0	0	0.0549245	0	-0.122372	0.0354756	0	0.121465	-0.00790914	0.231898	0	0	0	0.243912
G	77	I	Special	Hydrophobic	3.29	6.02	2.73	75	131	56	60.1	166.7	106.6	135	-4.9	S	B	N	N	B	B	325.255	325.738	326.48	loop	interface	interface	1.35577	2	0	0	0	0	0.143565	0.748764	0	0	0.032578	-2.84e-14	0.0548457	0.0354756	0	0.121465	0.153542	0.350858	0	0	0	0
G	77	K	Special	PositiveCharge	3.29	9.74	6.45	75	146	71	60.1	168.6	108.5	127	3.5	S	B	N	+	B	L	325.255	325.738	326.48	loop	interface	interface	1.35577	2	0	0	0	1.36	0.00686249	0.0746825	0	0	0.0549245	-0.231906	-0.122372	0.0354756	0	0.246267	0.0265227	0.232051	0	0	-0.16628	0
G	77	L	Special	Hydrophobic	3.29	9.71	6.42	75	131	56	60.1	166.7	106.6	138	-4.2	S	B	N	N	B	B	325.255	325.738	326.48	loop	interface	interface	1.35577	2	0	0	0	0	0.0680477	0.369797	0	0	0.0549245	-2.84e-14	-0.122372	0.0354756	0	0.121465	0.0480393	0.232264	0	0	0	0
G	77	N	Special	Polar	3.29	5.47	2.18	75	132	57	60.1	114.1	54	80	3.1	S	S	N	P	B	L	325.255	325.738	326.48	loop	interface	interface	1.35577	2	0	0	0	0	0.154557	0.773274	0	0	0.0549245	0	-0.122372	0.0354756	0	0.121465	-0.00318655	0.686967	0	0	0	0
G	77	P	Special	Special	3.29	6.3	3.01	75	115	40	60.1	112.7	52.6	42	1.2	S	P	N	N	B	P	325.255	325.738	326.48	loop	interface	interface	1.35577	2	0	0	0	0	0.0239555	0.150617	0	0	0.0549245	0	-0.122372	0.0354756	0	0.121465	0.0611239	0	0	0	0	0
G	77	Q	Special	Polar	3.29	6.24	2.95	75	146	71	60.1	143.8	83.7	87	3.1	S	B	N	P	B	L	325.255	325.738	326.48	loop	interface	interface	1.35577	2	0	0	0	0	0.0634205	0.313102	0	0	0.0549245	0	-0.122372	0.0354756	0	0.121465	-0.00828969	0.231898	0	0	0	0
G	77	R	Special	PositiveCharge	3.29	6.34	3.05	75	174	99	60.1	173.4	113.3	125	4.1	S	B	N	+	B	L	325.255	325.738	326.48	loop	interface	interface	1.35577	2	0	0	0	1.36	-0.0649543	-0.272729	0	0	-0.1313	-0.568936	-0.0999441	-0.332652	0	0.523858	0.321496	0.575031	0	0	-0.560282	0
G	77	S	Special	Polar	3.29	5.68	2.39	75	105	30	60.1	89	28.9	56	0.4	S	S	N	P	B	L	325.255	325.738	326.48	loop	interface	interface	1.35577	2	0	0	0	0	0.0634205	0.31025	0	0	0.0549245	0	-0.122372	0.0354756	0	0.121465	-0.0111408	0.231898	0	0	0	0
G	77	T	Special	Polar	3.29	5.6	2.31	75	119	44	60.1	116.1	56	59	0.3	S	S	N	P	B	L	325.255	325.738	326.48	loop	interface	interface	1.35577	2	0	0	0	0	0.107656	0.568365	0	0	0.0549245	0	-0.122372	0.0354756	0	0.121465	0.129163	0.349708	0	0	0	0
G	77	V	Special	Hydrophobic	3.29	5.61	2.32	75	117	42	60.1	140	79.9	109	-4.6	S	S	N	N	B	B	325.255	325.738	326.48	loop	interface	interface	1.35577	2	0	0	0	0	0.118388	0.614723	0	0	0.0549245	0	-0.122372	0.0354756	0	0.121465	0.175521	0.349708	0	0	0	0
G	77	Y	Special	Hydrophobic	3.29	5.66	2.37	75	181	106	60.1	193.6	133.5	147	0.9	S	B	N	N	B	B	325.255	325.738	326.48	loop	interface	interface	1.35577	2	0	0	0	0	0.357723	1.83154	0	0	0.0166745	1.17477	-0.122372	-0.0510372	0	0.210661	0.370789	0.232053	0	0	0	0
Y	78	A	Hydrophobic	Hydrophobic	5.66	6	0.34	181	89	-92	193.6	88.6	-105	112	-3.1	B	S	N	N	B	B	328.937	328.629	330.208	loop	interface	interface	0.589354	3	0	1	0	0	1.02846	5.06628	0	8.42204	3.89105	1.72893	-7.8017	3.69273	0.230915	-6.36967	1.3656	-0.0936085	-0.962737	0	0	0
Y	78	C	Hydrophobic	Special	5.66	5.07	-0.59	181	121	-60	193.6	108.5	-85.1	194	-3.8	B	S	N	P	B	C	328.937	328.629	330.208	loop	interface	interface	0.589354	3	0	1	0	0	0.508721	2.51708	0	8.42407	3.62531	1.72116	-7.10641	3.50186	-0.0962269	-6.33623	-1.14159	-0.0748543	-0.859461	0	0	0
Y	78	D	Hydrophobic	negativeCharge	5.66	5.05	-0.61	181	133	-48	193.6	111.1	-82.5	160	2.2	B	S	N	-	B	L	328.937	328.629	330.208	loop	interface	interface	0.589354	3	0	1	0	0	0.581497	2.7973	0	8.36509	3.66422	1.44692	-7.21958	3.56232	-0.0729138	-6.26855	-1.30577	-0.0271057	-0.887704	0	0.652681	0
Y	78	E	Hydrophobic	negativeCharge	5.66	3.22	-2.44	181	147	-34	193.6	138.4	-55.2	122	2.2	B	B	N	-	B	L	328.937	328.629	330.208	loop	interface	interface	0.589354	3	0	1	0	0	0.438817	2.01769	0	8.46739	3.7411	1.40167	-7.47126	3.57136	-0.1321	-6.22972	-1.63189	-0.117596	-0.912503	0	0.41874	0
Y	78	F	Hydrophobic	Hydrophobic	5.66	3.32	-2.34	181	165	-16	193.6	189.9	-3.7	22	-4.1	B	B	N	N	B	B	328.937	328.629	330.208	loop	interface	interface	0.589354	3	0	1	0	0	0.487243	2.38388	0	8.37434	3.39185	1.78522	-7.05624	3.1143	-0.0837177	-6.10464	-0.945991	-0.091248	-0.83683	0	0	0
Y	78	H	Hydrophobic	PositiveCharge	5.66	7.59	1.93	181	155	-26	193.6	153.2	-40.4	83	1.9	B	B	N	+	B	L	328.937	328.629	330.208	loop	interface	interface	0.589354	3	0	1	0	0.12	0.573126	2.72264	-0.196578	7.5264	3.77926	1.72321	-7.80876	3.57816	1.36839	-6.14042	-1.25062	-0.0998714	-0.901951	-8.34e-08	-0.0004421	0.243912
Y	78	L	Hydrophobic	Hydrophobic	5.66	9.71	4.05	181	131	-50	193.6	166.7	-26.9	36	-5.1	B	B	N	N	B	B	328.937	328.629	330.208	loop	interface	interface	0.589354	3	0	1	0	0	0.51824	2.73	0	8.4694	3.60513	1.74585	-7.16034	3.4546	-0.129249	-6.30954	-0.828026	-0.117821	-0.902984	0	0	0
Y	78	M	Hydrophobic	Hydrophobic	5.66	5.74	0.08	181	149	-32	193.6	162.9	-30.7	36	-3.2	B	B	N	N	B	B	328.937	328.629	330.208	loop	interface	interface	0.589354	3	0	1	0	0	0.429823	2.29867	0	8.55379	3.74638	1.7736	-7.46795	3.57959	-0.202505	-6.35891	-1.23008	-0.0952363	-0.863911	0	0	0
Y	78	P	Hydrophobic	Special	5.66	6.3	0.64	181	115	-66	193.6	112.7	-80.9	110	0.3	B	P	N	N	B	P	328.937	328.629	330.208	loop	interface	interface	0.589354	3	0	1	0	0	3.93958	19.8234	-0.196512	7.53764	3.80817	1.72622	-7.82053	3.71246	5.88249	-6.16625	11.372	-0.0323113	-0.974391	-8.34e-08	6.59e-08	-8.45e-08
Y	78	Q	Hydrophobic	Polar	5.66	6.24	0.58	181	146	-35	193.6	143.8	-49.8	99	2.2	B	B	N	P	B	L	328.937	328.629	330.208	loop	interface	interface	0.589354	3	0	1	0	0	0.408423	2.02817	0	8.33917	3.75181	1.73568	-7.39469	3.6286	-0.0814705	-6.36629	-1.52124	-0.0633957	-0.861733	0	0	0
Y	78	R	Hydrophobic	PositiveCharge	5.66	6.34	0.68	181	174	-7	193.6	173.4	-20.2	77	3.2	B	B	N	+	B	L	328.937	328.629	330.208	loop	interface	interface	0.589354	3	0	1	0	1.36	0.325952	1.85756	0	8.50043	3.49644	1.18338	-7.41901	3.07937	-0.188145	-5.64252	-0.619665	0.254768	-0.861748	0	-0.787499	0
Y	78	S	Hydrophobic	Polar	5.66	5.68	0.02	181	105	-76	193.6	89	-104.6	144	-0.5	B	S	N	P	B	L	328.937	328.629	330.208	loop	interface	interface	0.589354	3	0	1	0	0	0.902369	3.55128	0	8.40609	3.794	1.74082	-7.47066	3.68687	-0.100719	-6.36168	-0.0618221	-0.0816342	-0.925735	0	0	0
Y	78	T	Hydrophobic	Polar	5.66	5.6	-0.06	181	119	-62	193.6	116.1	-77.5	92	-0.6	B	S	N	P	B	L	328.937	328.629	330.208	loop	interface	interface	0.589354	3	0	1	0	0	0.588167	3.04012	0	8.30335	3.57642	1.73644	-6.83534	3.51919	-0.161476	-6.33727	-0.839091	0.077904	-0.842026	0	0	0
Y	78	V	Hydrophobic	Hydrophobic	5.66	5.61	-0.05	181	117	-64	193.6	140	-53.6	55	-5.5	B	S	N	N	B	B	328.937	328.629	330.208	loop	interface	interface	0.589354	3	0	1	0	0	0.730603	3.85668	0	8.45228	3.22239	1.73383	-6.06309	3.23094	-0.208704	-6.2974	-0.596644	0.383089	-0.704906	0	0	0
S	79	A	Polar	Hydrophobic	5.68	6	0.32	105	89	-16	89	88.6	-0.4	99	-2.6	S	S	P	N	L	B	332	332.315	333.276	loop	interface	interface	0.245161	1	0	0	0	0	1.50941	8.02827	5.95384	5.75367	1.27899	0.0508819	-2.4175	-0.757426	-0.0196372	-2.64827	1.00944	-0.175717	-0.430255	0	0	0
S	79	D	Polar	negativeCharge	5.68	5.05	-0.63	105	133	28	89	111.1	22.1	65	2.7	S	S	P	-	L	L	332	332.315	333.276	loop	interface	interface	0.245161	1	0	0	0	0	2.04779	12.6713	3.17119	2.41004	-0.648601	1.25234	2.93209	-2.06135	1.92807	-0.259177	2.45312	0.171345	0.499729	-8.34e-08	1.3222	-8.45e-08
S	79	E	Polar	negativeCharge	5.68	3.22	-2.46	105	147	42	89	138.4	49.4	80	2.7	S	B	P	-	L	L	332	332.315	333.276	loop	interface	interface	0.245161	1	0	0	0	0	2.25522	11.5646	5.95858	5.75835	-0.314755	1.5234	1.26547	-2.62742	-0.0120612	-1.30793	0.130198	-0.14796	-0.169688	0	1.33868	0
S	79	F	Polar	Hydrophobic	5.68	3.32	-2.36	105	165	60	89	189.9	100.9	155	-3.6	S	B	P	N	L	B	332	332.315	333.276	loop	interface	interface	0.245161	1	0	0	0	0	1.40856	7.48137	5.96848	5.76828	-2.01584	-1.32038	3.57537	-4.8288	-0.0193782	0.65189	-0.0931817	-0.205073	-0.45693	0	-7.11e-15	0
S	79	G	Polar	Special	5.68	3.29	-2.39	105	75	-30	89	60.1	-28.9	56	-0.4	S	S	P	N	L	B	332	332.315	333.276	loop	interface	interface	0.245161	1	0	0	0	0	1.93412	10.1047	5.94916	5.75778	3.19762	0.0450906	-7.1215	2.0424	0.00154454	-2.64827	3.11791	-0.237015	-1.49381	0	0	0
S	79	H	Polar	PositiveCharge	5.68	7.59	1.91	105	155	50	89	153.2	64.2	89	2.4	S	B	P	+	L	L	332	332.315	333.276	loop	interface	interface	0.245161	1	0	0	0	0.12	1.2583	6.69476	1.69182	1.49163	-1.14998	0.0320027	3.25842	-2.60545	-0.0213458	1.58035	2.37533	-0.201943	-0.45503	0	0	0.243912
S	79	I	Polar	Hydrophobic	5.68	6.02	0.34	105	131	26	89	166.7	77.7	142	-5.3	S	B	P	N	L	B	332	332.315	333.276	loop	interface	interface	0.245161	1	0	0	0	0	0.762193	4.1202	5.93722	5.76766	-3.42112	0.0337718	4.65951	-7.75963	0.173285	0.146292	-1.60413	0.187339	1.77744	0	0	0
S	79	K	Polar	PositiveCharge	5.68	9.74	4.06	105	146	41	89	168.6	79.6	121	3.1	S	B	P	+	L	L	332	332.315	333.276	loop	interface	interface	0.245161	1	0	0	0	1.36	0.814349	5.09923	5.55215	5.38942	-1.73222	-1.2427	2.47665	-4.97043	0.0353879	0.562489	-0.0752559	-0.0773769	0.796642	0	-0.818886	0
S	79	L	Polar	Hydrophobic	5.68	9.71	4.03	105	131	26	89	166.7	77.7	145	-4.6	S	B	P	N	L	B	332	332.315	333.276	loop	interface	interface	0.245161	1	0	0	0	0	1.47121	7.90373	5.937	5.74576	-2.09762	0.0271005	4.03071	-5.41729	0.04574	-0.425136	-0.186146	0.243612	0.549035	0	0	0
S	79	M	Polar	Hydrophobic	5.68	5.74	0.06	105	149	44	89	162.9	73.9	135	-2.7	S	B	P	N	L	B	332	332.315	333.276	loop	interface	interface	0.245161	1	0	0	0	0	0.973527	6.06426	5.96439	5.76764	-3.23932	0.00723363	3.20318	-7.35903	0.101918	0.290554	1.29704	0.0306517	1.53448	0	0	0
S	79	N	Polar	Polar	5.68	5.47	-0.21	105	132	27	89	114.1	25.1	46	2.7	S	S	P	P	L	L	332	332.315	333.276	loop	interface	interface	0.245161	1	0	0	0	0	1.14947	6.35972	1.80488	1.60469	-0.282371	0.0391759	1.23985	-1.56432	-0.0217441	0.811511	2.93135	-0.20331	-0.369187	0	0	0
S	79	P	Polar	Special	5.68	6.3	0.62	105	115	10	89	112.7	23.7	74	0.8	S	P	P	N	L	P	332	332.315	333.276	loop	interface	interface	0.245161	1	0	0	0	0	2.2437	11.689	5.96446	5.76424	0.277339	0.0517245	-3.14897	-2.71274	0.009388	-1.34898	7.03032	-0.197757	0.223745	0	0	0
S	79	Q	Polar	Polar	5.68	6.24	0.56	105	146	41	89	143.8	54.8	68	2.7	S	B	P	P	L	L	332	332.315	333.276	loop	interface	interface	0.245161	1	0	0	0	0	1.17569	6.18456	3.49668	2.44148	-1.01944	-0.00742382	2.0469	-3.04534	-0.0200197	2.28903	0.187843	-0.185155	-0.097117	0	0	0
S	79	R	Polar	PositiveCharge	5.68	6.34	0.66	105	174	69	89	173.4	84.4	110	3.7	S	B	P	+	L	L	332	332.315	333.276	loop	interface	interface	0.245161	1	0	0	0	1.36	0.940812	5.23141	3.35284	3.18876	-2.12019	-4.55531	6.06233	-3.84095	-0.0176544	4.36814	0.221058	0.189742	0.11167	0	-1.61736	0
S	79	T	Polar	Polar	5.68	5.6	-0.08	105	119	14	89	116.1	27.1	58	-0.1	S	S	P	P	L	L	332	332.315	333.276	loop	interface	interface	0.245161	1	0	0	0	0	-0.442609	4.8614	0.990109	1.04445	-1.27961	-0.00380557	2.21118	-2.39842	2.886	0.00961925	-2.07734	3.47922	1.03166	0	0	0
S	79	V	Polar	Hydrophobic	5.68	5.61	-0.07	105	117	12	89	140	51	124	-5	S	S	P	N	L	B	332	332.315	333.276	loop	interface	interface	0.245161	1	0	0	0	0	1.25876	6.92329	5.95496	5.75594	-1.02935	0.0379237	3.06111	-3.40025	0.147376	-1.28702	-2.87105	0.553639	0.962119	0	0	0
S	79	W	Polar	Hydrophobic	5.68	5.89	0.21	105	204	99	89	227.8	138.8	177	0.1	S	B	P	N	L	B	332	332.315	333.276	loop	interface	interface	0.245161	1	0	0	0	0	1.93747	9.83537	5.96724	5.76705	-1.427	0.0364314	3.26538	-3.6411	-0.000287667	-0.712636	0.775975	-0.195684	-0.535676	0	0	0
S	79	Y	Polar	Hydrophobic	5.68	5.66	-0.02	105	181	76	89	193.6	104.6	144	0.5	S	B	P	N	L	B	332	332.315	333.276	loop	interface	interface	0.245161	1	0	0	0	0	1.41738	7.54589	5.95825	5.75808	-1.65688	-1.26566	3.08602	-4.30859	-0.015186	0.413742	-0.177945	-0.245943	-0.464239	0	0	0
D	80	A	negativeCharge	Hydrophobic	5.05	6	0.95	133	89	-44	111.1	88.6	-22.5	126	-5.3	S	S	-	N	L	B	335.642	336.291	337.263	loop	interface	interface	0.243523	3	0	0	0	0	0.104554	0.72325	0.0302033	8.28774	1.89052	2.61009	-5.88894	1.1267	-0.0568461	-5.87757	0.389848	0.00270983	-0.56073	0	-1.7912	0
D	80	G	negativeCharge	Special	5.05	3.29	-1.76	133	75	-58	111.1	60.1	-51	94	-3.1	S	S	-	N	L	B	335.642	336.291	337.263	loop	interface	interface	0.243523	3	0	0	0	0	0.241606	1.96475	0.0336283	8.34903	3.72448	2.72777	-8.71482	3.18671	-0.0532629	-6.06775	0.614767	-0.0440963	-1.43599	0	-1.79169	0
D	80	I	negativeCharge	Hydrophobic	5.05	6.02	0.97	133	131	-2	111.1	166.7	55.6	168	-8	S	B	-	N	L	B	335.642	336.291	337.263	loop	interface	interface	0.243523	3	0	0	0	0	-0.884513	-4.61241	-0.468884	8.04378	-5.66981	1.99341	2.80054	-10.1484	0.482403	-2.1025	2.04642	0.182104	2.0977	0	-1.77149	0
D	80	K	negativeCharge	PositiveCharge	5.05	9.74	4.69	133	146	13	111.1	168.6	57.5	101	0.4	S	B	-	+	L	L	335.642	336.291	337.263	loop	interface	interface	0.243523	3	0	0	0	1.36	-0.16193	0.0885464	-0.952837	7.53222	-3.31021	2.39838	2.4978	-5.43875	0.0266712	-1.33755	1.11306	0.162361	1.06024	0	-2.60261	0
D	80	L	negativeCharge	Hydrophobic	5.05	9.71	4.66	133	131	-2	111.1	166.7	55.6	172	-7.3	S	B	-	N	L	B	335.642	336.291	337.263	loop	interface	interface	0.243523	3	0	0	0	0	-1.27805	-5.44264	-0.341529	8.05967	-6.05457	2.07685	3.63737	-10.7264	0.34715	-2.16634	1.26736	0.227424	2.38968	0	-1.76963	0
D	80	P	negativeCharge	Special	5.05	6.3	1.25	133	115	-18	111.1	112.7	1.6	108	-1.9	S	P	-	N	L	P	335.642	336.291	337.263	loop	interface	interface	0.243523	3	0	0	0	0	-1.16956	-5.28272	3.14275	12.1613	0.970673	2.58879	-8.31116	-2.54942	-1.55943	-6.89661	-3.06266	0.0240599	-2.8497	8.34e-08	-1.79099	8.45e-08
D	80	Q	negativeCharge	Polar	5.05	6.24	1.19	133	146	13	111.1	143.8	32.7	61	0	S	B	-	P	L	L	335.642	336.291	337.263	loop	interface	interface	0.243523	3	0	0	0	0	-0.0904659	0.312262	-0.0352348	1.71324	-2.91565	2.23762	2.79416	-3.18072	0.0440452	0.464392	0.961697	0.0189551	0.896457	0	-1.79024	0
D	80	R	negativeCharge	PositiveCharge	5.05	6.34	1.29	133	174	41	111.1	173.4	62.3	96	1	S	B	-	+	L	L	335.642	336.291	337.263	loop	interface	interface	0.243523	3	0	0	0	1.36	-1.11117	-7.48823	-6.98661	-1.28743	-6.44514	0.693376	9.69654	-5.38994	-1.3984	3.99835	2.71344	0.424574	0.584435	8.34e-08	-3.50699	8.45e-08
D	80	S	negativeCharge	Polar	5.05	5.68	0.63	133	105	-28	111.1	89	-22.1	65	-2.7	S	S	-	P	L	L	335.642	336.291	337.263	loop	interface	interface	0.243523	3	0	0	0	0	0.245088	1.47084	0.0272441	5.42725	1.49564	2.5276	-3.86669	2.17068	0.0987241	-4.32613	-1.27284	0.997065	-0.315907	0	-1.80769	0
D	80	T	negativeCharge	Polar	5.05	5.6	0.55	133	119	-14	111.1	116.1	5	85	-2.8	S	S	-	P	L	L	335.642	336.291	337.263	loop	interface	interface	0.243523	3	0	0	0	0	1.01807	4.90369	-0.0668449	5.24284	-0.936699	2.09151	0.924903	-0.932547	0.0869538	-3.98171	1.99266	2.25232	0.41026	0	-1.76971	0
D	80	V	negativeCharge	Hydrophobic	5.05	5.61	0.56	133	117	-16	111.1	140	28.9	152	-7.7	S	S	-	N	L	B	335.642	336.291	337.263	loop	interface	interface	0.243523	3	0	0	0	0	0.138319	0.604518	-0.148268	8.06568	-2.17882	2.02528	0.213578	-4.16009	-0.0193113	-3.71958	2.22525	0.0713746	1.15024	0	-1.77058	0
D	80	W	negativeCharge	Hydrophobic	5.05	5.89	0.84	133	204	71	111.1	227.8	116.7	181	-2.6	S	B	-	N	L	B	335.642	336.291	337.263	loop	interface	interface	0.243523	3	0	0	0	0	1.95631	7.80379	-0.120364	8.09155	-5.13436	1.89463	3.13433	-7.22805	6.77086	-1.07486	3.22685	0.0113307	0.974396	0	-1.76813	0
R	81	A	PositiveCharge	Hydrophobic	6.34	6	-0.34	174	89	-85	173.4	88.6	-84.8	112	-6.3	B	S	+	N	L	B	335.994	336.234	337.986	loop	interface	interface	0.0766423	2	0	0	0	-1.36	3.39082	11.4257	9.71936	9.28516	13.3558	5.6438	-21.8226	12.3146	-2.48717	-12.3417	-1.50364	-2.24946	-3.21188	8.34e-08	1.51148	8.45e-08
R	81	C	PositiveCharge	Special	6.34	5.07	-1.27	174	121	-53	173.4	108.5	-64.9	180	-7	B	S	+	P	L	C	335.994	336.234	337.986	loop	interface	interface	0.0766423	2	0	0	0	-1.36	4.09557	15.597	9.74444	9.72172	10.4528	5.70502	-18.2484	9.09874	-3.65301	-9.04708	1.50979	-1.20675	-2.54501	8.34e-08	1.5197	8.45e-08
R	81	D	PositiveCharge	negativeCharge	6.34	5.05	-1.29	174	133	-41	173.4	111.1	-62.3	96	-1	B	S	+	-	L	L	335.994	336.234	337.986	loop	interface	interface	0.0766423	2	0	0	0	-1.36	6.39344	24.8918	7.10863	7.12021	9.47963	11.3868	-9.04174	9.15942	-3.74947	-9.04038	0.763618	-1.7252	-2.03	8.34e-08	3.43022	8.45e-08
R	81	E	PositiveCharge	negativeCharge	6.34	3.22	-3.12	174	147	-27	173.4	138.4	-35	54	-1	B	B	+	-	L	L	335.994	336.234	337.986	loop	interface	interface	0.0766423	2	0	0	0	-1.36	5.74039	22.4549	9.96931	10.1179	9.30773	9.28526	-12.8799	7.54428	-3.36402	-8.43898	-0.559956	-1.56987	-1.35499	8.34e-08	3.04322	8.45e-08
R	81	H	PositiveCharge	PositiveCharge	6.34	7.59	1.25	174	155	-19	173.4	153.2	-20.2	29	-1.3	B	B	+	+	L	L	335.994	336.234	337.986	loop	interface	interface	0.0766423	2	0	0	0	-1.24	3.02892	11.5886	5.53114	4.87712	4.63539	1.17681	-3.7131	2.32813	0.063206	-5.52491	1.17249	-1.55375	-1.23863	0	0.108054	2.488
R	81	I	PositiveCharge	Hydrophobic	6.34	6.02	-0.32	174	131	-43	173.4	166.7	-6.7	97	-9	B	B	+	N	L	B	335.994	336.234	337.986	loop	interface	interface	0.0766423	2	0	0	0	-1.36	4.07662	16.1915	9.37959	8.96805	5.11738	5.44061	-11.4082	-0.46723	6.61943	-6.93623	0.178377	-2.32337	0.181127	0	1.62302	0
R	81	L	PositiveCharge	Hydrophobic	6.34	9.71	3.37	174	131	-43	173.4	166.7	-6.7	102	-8.3	B	B	+	N	L	B	335.994	336.234	337.986	loop	interface	interface	0.0766423	2	0	0	0	-1.36	2.19629	6.13335	9.28475	8.459	4.66608	5.52489	-12.3286	-2.17364	-0.492258	-5.69009	-0.592625	-2.19133	-0.196596	0	1.66721	0
R	81	N	PositiveCharge	Polar	6.34	5.47	-0.87	174	132	-42	173.4	114.1	-59.3	86	-1	B	S	+	P	L	L	335.994	336.234	337.986	loop	interface	interface	0.0766423	2	0	0	0	-1.36	3.99682	14.0838	8.08606	-2.16812	8.2252	6.22155	-9.99236	8.29157	-2.1578	-4.05065	1.15764	-1.59782	-1.85189	8.34e-08	2.0685	8.45e-08
R	81	P	PositiveCharge	Special	6.34	6.3	-0.04	174	115	-59	173.4	112.7	-60.7	103	-2.9	B	P	+	N	L	P	335.994	336.234	337.986	loop	interface	interface	0.0766423	2	0	0	0	-1.36	4.24845	17.1226	12.2523	11.9923	11.0229	5.60918	-20.6746	7.59832	3.34525	-10.7154	-2.8144	-1.98567	-10.1755	8.34e-08	1.49231	8.45e-08
R	81	Q	PositiveCharge	Polar	6.34	6.24	-0.1	174	146	-28	173.4	143.8	-29.6	43	-1	B	B	+	P	L	L	335.994	336.234	337.986	loop	interface	interface	0.0766423	2	0	0	0	-1.36	3.48018	13.8408	7.02317	6.29777	6.52958	5.99023	-10.0936	4.99896	-1.62994	-4.38034	-0.462354	-2.1333	-1.09506	8.34e-08	1.70053	8.45e-08
R	81	S	PositiveCharge	Polar	6.34	5.68	-0.66	174	105	-69	173.4	89	-84.4	110	-3.7	B	S	+	P	L	L	335.994	336.234	337.986	loop	interface	interface	0.0766423	2	0	0	0	-1.36	4.12754	14.8463	10.0593	5.60406	12.4224	5.60188	-18.4705	13.3538	-3.83167	-9.54569	-0.218457	-1.6405	-2.1259	8.34e-08	1.51164	8.45e-08
R	81	T	PositiveCharge	Polar	6.34	5.6	-0.74	174	119	-55	173.4	116.1	-57.3	71	-3.8	B	S	+	P	L	L	335.994	336.234	337.986	loop	interface	interface	0.0766423	2	0	0	0	-1.36	3.38643	12.7929	10.0843	5.18104	9.78089	5.7058	-14.4088	8.53552	-2.46109	-9.29612	-0.0464719	-1.80074	-1.50956	8.34e-08	1.51854	8.45e-08
R	81	V	PositiveCharge	Hydrophobic	6.34	5.61	-0.73	174	117	-57	173.4	140	-33.4	96	-8.7	B	S	+	N	L	B	335.994	336.234	337.986	loop	interface	interface	0.0766423	2	0	0	0	-1.36	4.35769	17.2914	9.90104	8.93883	8.27227	5.47999	-14.585	4.83993	4.70734	-9.24149	0.143133	-2.85068	-0.706957	0	1.68601	0
A	82	D	Hydrophobic	negativeCharge	6	5.05	-0.95	89	133	44	88.6	111.1	22.5	126	5.3	S	S	N	-	B	L	334.219	333.695	335.124	loop	interface	interface	0.302326	4	0	0	0	0	1.15447	4.84096	0.0162912	0	-1.42015	-0.427879	4.73097	-0.907862	0.222634	1.28503	0.945838	0.00657557	0.0118245	0	0.389515	0
A	82	F	Hydrophobic	Hydrophobic	6	3.32	-2.68	89	165	76	88.6	189.9	101.3	113	-1	S	B	N	N	B	B	334.219	333.695	335.124	loop	interface	interface	0.302326	4	0	0	0	0	-0.28601	-0.389905	-0.127942	0	-6.34517	-0.0267853	6.18844	-8.62999	0.92178	4.50677	2.74705	0.375945	2.00982	0	0	0
A	82	H	Hydrophobic	PositiveCharge	6	7.59	1.59	89	155	66	88.6	153.2	64.6	86	5	S	B	N	+	B	L	334.219	333.695	335.124	loop	interface	interface	0.302326	4	0	0	0	0.12	0.447131	3.69237	-0.00463718	0	-4.59017	0	6.7731	-4.87084	0.0202429	3.50128	2.52713	0.0477818	1.78075	0	0	0.288485
A	82	K	Hydrophobic	PositiveCharge	6	9.74	3.74	89	146	57	88.6	168.6	80	106	5.7	S	B	N	+	B	L	334.219	333.695	335.124	loop	interface	interface	0.302326	4	0	0	0	1.36	-0.182997	-0.637652	0.210193	0.864946	-2.81389	-0.143633	3.05987	-4.00435	-1.46573	2.86052	1.143	0.0459932	0.90372	8.34e-08	-0.394563	8.45e-08
A	82	L	Hydrophobic	Hydrophobic	6	9.71	3.71	89	131	42	88.6	166.7	78.1	96	-2	S	B	N	N	B	B	334.219	333.695	335.124	loop	interface	interface	0.302326	4	0	0	0	0	-0.340676	-1.61684	-0.00565115	0	-4.4565	0	4.87136	-6.6285	0.13435	3.47954	0.93345	0.055102	1.78064	0	0	0
A	82	N	Hydrophobic	Polar	6	5.47	-0.53	89	132	43	88.6	114.1	25.5	111	5.3	S	S	N	P	B	L	334.219	333.695	335.124	loop	interface	interface	0.302326	4	0	0	0	0	0.795755	3.90827	-0.138788	0.475853	-2.12186	1.7e-06	4.67137	-1.39322	-1.27179	2.10001	1.54112	0.0455773	0.644719	8.34e-08	-1.14e-07	8.45e-08
A	82	P	Hydrophobic	Special	6	6.3	0.3	89	115	26	88.6	112.7	24.1	27	3.4	S	P	N	N	B	P	334.219	333.695	335.124	loop	interface	interface	0.302326	4	0	0	0	0	-0.633006	-2.32985	-0.110598	-0.00611924	-2.57319	-0.0218093	-0.951767	-4.50571	6.34231	1.55437	-2.15721	0.0998883	-2.88258	0	0	0
A	82	R	Hydrophobic	PositiveCharge	6	6.34	0.34	89	174	85	88.6	173.4	84.8	112	6.3	S	B	N	+	B	L	334.219	333.695	335.124	loop	interface	interface	0.302326	4	0	0	0	1.36	-0.0989411	0.629924	0.00942436	-1.84618	-2.88428	-0.117889	3.24648	-3.44635	0.131202	4.67671	1.04442	0.428846	0.855269	0	-0.612451	0
A	82	S	Hydrophobic	Polar	6	5.68	-0.32	89	105	16	88.6	89	0.4	99	2.6	S	S	N	P	B	L	334.219	333.695	335.124	loop	interface	interface	0.302326	4	0	0	0	0	0.503201	3.19579	0.0162912	0	-0.110801	0	1.0361	1.34021	0.0493734	0.990836	-0.109692	-0.0165216	-0.117725	0	0	0
A	82	T	Hydrophobic	Polar	6	5.6	-0.4	89	119	30	88.6	116.1	27.5	58	2.5	S	S	N	P	B	L	334.219	333.695	335.124	loop	interface	interface	0.302326	4	0	0	0	0	0.971664	5.01065	-0.861004	-0.214502	-1.37376	1.67e-06	3.47685	-0.685355	-1.39245	1.55961	4.42158	0.0796773	0.678998	8.34e-08	-1.1e-07	8.45e-08
A	82	V	Hydrophobic	Hydrophobic	6	5.61	-0.39	89	117	28	88.6	140	51.4	64	-2.4	S	S	N	N	B	B	334.219	333.695	335.124	loop	interface	interface	0.302326	4	0	0	0	0	0.244049	1.94375	0.0254684	0	-3.30767	0	4.22338	-4.50517	0.248233	2.39771	2.77578	0.0860199	1.22269	0	0	0
A	82	Y	Hydrophobic	Hydrophobic	6	5.66	-0.34	89	181	92	88.6	193.6	105	112	3.1	S	B	N	N	B	B	334.219	333.695	335.124	loop	interface	interface	0.302326	4	0	0	0	0	-0.274231	-0.67826	-0.0546852	-2.2358	-5.78687	0	6.17493	-7.42222	1.23398	4.6694	2.54018	0.202845	0.942431	0	0	0
R	83	A	PositiveCharge	Hydrophobic	6.34	6	-0.34	174	89	-85	173.4	88.6	-84.8	112	-6.3	B	S	+	N	L	B	335.803	337.528	339.44	strand	interface	interface	0.167883	5	0	0	0	1.84	-0.298335	3.36479	2.80312	9.77944	10.1265	6.65571	-18.6163	7.81695	-2.89481	-11.8853	-1.08631	-0.698783	-1.00856	8.34e-08	1.37241	-0.00780622
R	83	C	PositiveCharge	Special	6.34	5.07	-1.27	174	121	-53	173.4	108.5	-64.9	180	-7	B	S	+	P	L	C	335.803	337.528	339.44	strand	interface	interface	0.167883	5	0	0	0	-0.61	-0.592973	3.0343	3.15074	9.20282	8.40379	6.51699	-16.7727	5.99442	-3.95263	-9.21154	-0.856049	-0.756985	-1.08538	8.34e-08	1.32312	-0.00765637
R	83	E	PositiveCharge	negativeCharge	6.34	3.22	-3.12	174	147	-27	173.4	138.4	-35	54	-1	B	B	+	-	L	L	335.803	337.528	339.44	strand	interface	interface	0.167883	5	0	0	0	-1.36	0.0696959	7.01221	0.617918	6.70844	7.27712	7.70637	-12.8386	4.8506	-3.59375	-6.70534	1.8134	-0.758071	-1.07158	8.34e-08	1.94183	-0.00765637
R	83	G	PositiveCharge	Special	6.34	3.29	-3.05	174	75	-99	173.4	60.1	-113.3	125	-4.1	B	S	+	N	L	B	335.803	337.528	339.44	strand	interface	interface	0.167883	5	0	0	0	-1.36	0.0380451	6.05182	3.7902	10.0411	13.7287	7.608	-22.6627	12.4596	-5.9918	-12.7903	-0.840914	-0.73756	-1.47427	8.34e-08	1.45528	-0.00773649
R	83	H	PositiveCharge	PositiveCharge	6.34	7.59	1.25	174	155	-19	173.4	153.2	-20.2	29	-1.3	B	B	+	+	L	L	335.803	337.528	339.44	strand	interface	interface	0.167883	5	0	0	0	-1.24	-0.404347	4.16607	3.12671	9.25197	5.25283	6.48459	-11.5487	1.81338	-3.6252	-7.71179	-0.0698174	-0.416454	-1.0554	8.34e-08	1.30498	0.303573
R	83	I	PositiveCharge	Hydrophobic	6.34	6.02	-0.32	174	131	-43	173.4	166.7	-6.7	97	-9	B	B	+	N	L	B	335.803	337.528	339.44	strand	interface	interface	0.167883	5	0	0	0	55.75	-0.351278	3.48387	3.13294	9.24212	3.14728	6.53116	-12.2669	-3.38392	1.99319	-6.97499	0.574995	0.165868	-1.15755	8.34e-08	1.32212	8.45e-08
R	83	L	PositiveCharge	Hydrophobic	6.34	9.71	3.37	174	131	-43	173.4	166.7	-6.7	102	-8.3	B	B	+	N	L	B	335.803	337.528	339.44	strand	interface	interface	0.167883	5	0	0	0	28.27	-0.749822	-1.76502	3.14493	9.24254	3.66845	6.48549	-13.2592	-3.11115	-2.80046	-6.99715	0.828486	-0.273887	-1.24325	8.34e-08	1.30745	-0.000471066
R	83	P	PositiveCharge	Special	6.34	6.3	-0.04	174	115	-59	173.4	112.7	-60.7	103	-2.9	B	P	+	N	L	P	335.803	337.528	339.44	strand	interface	interface	0.167883	5	0	0	0	-1.36	5.16611	30.6126	7.55478	9.18435	5.79217	6.52084	-14.0409	1.31502	18.2752	-9.54328	4.74361	-0.533943	-0.634927	8.34e-08	1.31186	0.03289
R	83	Q	PositiveCharge	Polar	6.34	6.24	-0.1	174	146	-28	173.4	143.8	-29.6	43	-1	B	B	+	P	L	L	335.803	337.528	339.44	strand	interface	interface	0.167883	5	0	0	0	-1.36	0.0245868	6.69418	3.13123	9.21829	7.13005	6.58807	-13.0481	4.77857	-3.72882	-8.79382	0.526956	-0.432426	-1.10409	8.34e-08	1.33179	-0.00765637
R	83	T	PositiveCharge	Polar	6.34	5.6	-0.74	174	119	-55	173.4	116.1	-57.3	71	-3.8	B	S	+	P	L	L	335.803	337.528	339.44	strand	interface	interface	0.167883	5	0	0	0	0.93	0.977671	9.9398	2.64959	8.22023	7.59572	6.55315	-14.1043	5.36691	-0.00533465	-8.72989	0.288046	0.77976	-1.08901	8.34e-08	1.32596	8.45e-08
R	83	V	PositiveCharge	Hydrophobic	6.34	5.61	-0.73	174	117	-57	173.4	140	-33.4	96	-8.7	B	S	+	N	L	B	335.803	337.528	339.44	strand	interface	interface	0.167883	5	0	0	0	58.47	0.532602	9.33872	3.74089	10.0274	7.67781	7.10303	-16.5102	3.32637	-1.03627	-9.91607	0.123423	3.38086	-1.35957	8.34e-08	1.42141	8.45e-08
R	83	Y	PositiveCharge	Hydrophobic	6.34	5.66	-0.68	174	181	7	173.4	193.6	20.2	77	-3.2	B	B	+	N	L	B	335.803	337.528	339.44	strand	interface	interface	0.167883	5	0	0	0	17.18	-1.64201	-1.86899	3.10607	3.22165	3.27574	6.75209	-10.8418	-1.77504	-3.54037	-3.21201	0.195434	-0.371404	-1.03144	8.34e-08	1.32919	-0.00856381
S	84	A	Polar	Hydrophobic	5.68	6	0.32	105	89	-16	89	88.6	-0.4	99	-2.6	S	S	P	N	L	B	335.847	335.663	336.74	strand	interface	interface	0.554839	1	0	0	0	0	-0.068629	-0.575347	0.46104	0.49854	0.0787567	0	-0.725959	-0.796829	0.224675	-0.818694	0.784	-0.280876	0	0	0	0
S	84	C	Polar	Special	5.68	5.07	-0.61	105	121	16	89	108.5	19.5	112	-3.3	S	S	P	P	L	C	335.847	335.663	336.74	strand	interface	interface	0.554839	1	0	0	0	0	-0.0386165	-0.328106	0.460949	0.498449	-1.89784	0	1.04661	-3.02064	0.262246	0.82112	1.12278	0.378227	0	0	0	0
S	84	D	Polar	negativeCharge	5.68	5.05	-0.63	105	133	28	89	111.1	22.1	65	2.7	S	S	P	-	L	L	335.847	335.663	336.74	strand	interface	interface	0.554839	1	0	0	0	0	0.511035	0.952122	0	0	-0.588553	-0.606579	0.805909	-1.27686	0.063877	0.409224	2.37665	-0.322824	0	0	0.0912823	0
S	84	E	Polar	negativeCharge	5.68	3.22	-2.46	105	147	42	89	138.4	49.4	80	2.7	S	B	P	-	L	L	335.847	335.663	336.74	strand	interface	interface	0.554839	1	0	0	0	0	-0.299797	-1.86456	-0.00864544	0	-2.73548	-0.323089	2.44499	-4.8008	0.126657	1.50872	2.16838	-0.249789	0	0	0.00449208	0
S	84	G	Polar	Special	5.68	3.29	-2.39	105	75	-30	89	60.1	-28.9	56	-0.4	S	S	P	N	L	B	335.847	335.663	336.74	strand	interface	interface	0.554839	1	0	0	0	0	0.327241	1.05665	0.460949	0.498449	1.47086	0	-2.61286	1.04066	-0.0611903	-0.974004	1.51155	-0.27777	0	0	0	0
S	84	H	Polar	PositiveCharge	5.68	7.59	1.91	105	155	50	89	153.2	64.2	89	2.4	S	B	P	+	L	L	335.847	335.663	336.74	strand	interface	interface	0.554839	1	0	0	0	0.12	0.5245	1.44341	0.46104	0.49854	-0.756798	1.14e-13	1.26379	-1.30427	0.0996891	-0.325655	1.41431	-0.151153	0	0	3.55e-15	0.243912
S	84	L	Polar	Hydrophobic	5.68	9.71	4.03	105	131	26	89	166.7	77.7	145	-4.6	S	B	P	N	L	B	335.847	335.663	336.74	strand	interface	interface	0.554839	1	0	0	0	2.61	-0.733614	-4.247	0.200266	0.498449	-4.89651	0	4.04811	-8.73366	0.221487	1.90119	2.53327	-0.0196027	0	0	0	0
S	84	N	Polar	Polar	5.68	5.47	-0.21	105	132	27	89	114.1	25.1	46	2.7	S	S	P	P	L	L	335.847	335.663	336.74	strand	interface	interface	0.554839	1	0	0	0	0	0.494578	1.33333	-4.55e-13	0	-0.759642	0	0.990879	-1.46773	0.0545628	0.114257	2.72101	-0.320006	0	0	0	0
S	84	Q	Polar	Polar	5.68	6.24	0.56	105	146	41	89	143.8	54.8	68	2.7	S	B	P	P	L	L	335.847	335.663	336.74	strand	interface	interface	0.554839	1	0	0	0	0	-0.6916	-4.34311	0.431072	-4.03848	-3.44633	0	3.83088	-5.03768	0.0897217	3.44143	0.530232	-0.143956	0	0	0	0
S	84	R	Polar	PositiveCharge	5.68	6.34	0.66	105	174	69	89	173.4	84.4	110	3.7	S	B	P	+	L	L	335.847	335.663	336.74	strand	interface	interface	0.554839	1	0	0	0	1.36	-0.655893	-5.65763	0.415566	-11.0081	-4.95071	0.447366	6.14187	-6.5114	0.394837	7.51545	1.65358	0.211201	0	0	0.0326869	0
S	84	T	Polar	Polar	5.68	5.6	-0.08	105	119	14	89	116.1	27.1	58	-0.1	S	S	P	P	L	L	335.847	335.663	336.74	strand	interface	interface	0.554839	1	0	0	0	0	-0.0784974	-0.87879	-1.70763	-1.85763	-2.363	0	2.67486	-3.93837	0.87305	2.03534	2.39504	1.00954	0	0	0	0
S	84	V	Polar	Hydrophobic	5.68	5.61	-0.07	105	117	12	89	140	51	124	-5	S	S	P	N	L	B	335.847	335.663	336.74	strand	interface	interface	0.554839	1	0	0	0	5.7	0.153171	-0.610319	-0.0249055	0	-2.63336	0	2.47966	-4.68706	1.01568	0.947011	1.17406	1.11859	0	0	0	0
I	85	A	Hydrophobic	Hydrophobic	6.02	6	-0.02	131	89	-42	166.7	88.6	-78.1	94	2.7	B	S	N	N	B	B	338.479	339.404	341.611	strand	interface	interface	0.19797	1	0	0	0	0	2.37448	11.7565	0.232189	0	7.0729	0	-4.67162	12.5292	-0.428253	-4.44794	1.81995	-0.303027	0	0	0	-0.0468864
I	85	E	Hydrophobic	negativeCharge	6.02	3.22	-2.8	131	147	16	166.7	138.4	-28.3	134	8	B	B	N	-	B	L	338.479	339.404	341.611	strand	interface	interface	0.19797	1	0	0	0	0	2.35157	10.7209	0.0876286	0	3.57129	-1.34761	1.20247	7.74548	-0.501482	-1.27363	1.79121	-0.220077	0	0	-0.286412	-0.0479671
I	85	G	Hydrophobic	Special	6.02	3.29	-2.73	131	75	-56	166.7	60.1	-106.6	135	4.9	B	S	N	N	B	B	338.479	339.404	341.611	strand	interface	interface	0.19797	1	0	0	0	0	3.34841	16.3174	0.302236	0	9.10749	0	-6.28021	16.0331	-0.832816	-4.74212	3.17038	-0.393237	0	0	0	-0.0473688
I	85	H	Hydrophobic	PositiveCharge	6.02	7.59	1.57	131	155	24	166.7	153.2	-13.5	94	7.7	B	B	N	+	B	L	338.479	339.404	341.611	strand	interface	interface	0.19797	1	0	0	0	0.12	1.4977	6.71292	0.105145	-1.55911	0.579088	8.53e-14	2.12259	4.11911	0.209971	-0.379433	1.2667	-0.198005	0	0	0	0.446856
I	85	L	Hydrophobic	Hydrophobic	6.02	9.71	3.69	131	131	0	166.7	166.7	0	5	0.7	B	B	N	N	B	B	338.479	339.404	341.611	strand	interface	interface	0.19797	1	0	0	0	0	0.0722008	0.612936	-2.55e-11	0	0.143842	0	-0.116071	0.149649	-0.388685	-0.230374	1.15908	-0.0970654	0	0	0	-0.00743751
I	85	N	Hydrophobic	Polar	6.02	5.47	-0.55	131	132	1	166.7	114.1	-52.6	149	8	B	S	N	P	B	L	338.479	339.404	341.611	strand	interface	interface	0.19797	1	0	0	0	0	2.43416	11.8071	0.108336	0	4.98184	0	-1.50624	10.269	-0.574056	-2.77147	1.54953	-0.206648	0	0	0	-0.0431887
I	85	P	Hydrophobic	Special	6.02	6.3	0.28	131	115	-16	166.7	112.7	-54	95	6.1	B	P	N	N	B	P	338.479	339.404	341.611	strand	interface	interface	0.19797	1	0	0	0	0	3.72825	20.1825	6.16155	1.5375	4.26026	0.00201221	-2.20183	7.67733	-1.18157	-3.15805	7.79401	-0.674438	0.00725247	8.34e-08	7.78e-10	-0.0342905
I	85	Q	Hydrophobic	Polar	6.02	6.24	0.22	131	146	15	166.7	143.8	-22.9	109	8	B	B	N	P	B	L	338.479	339.404	341.611	strand	interface	interface	0.19797	1	0	0	0	0	1.48557	7.5827	0.0526516	-2.22741	2.26268	5.68e-14	0.0882616	6.39517	-0.0783162	0.164634	1.19825	-0.229468	0	0	0	-0.0437494
I	85	R	Hydrophobic	PositiveCharge	6.02	6.34	0.32	131	174	43	166.7	173.4	6.7	97	9	B	B	N	+	B	L	338.479	339.404	341.611	strand	interface	interface	0.19797	1	0	0	0	1.36	1.9828	9.46318	-0.561801	-6.49906	-1.30927	1.31107	6.43658	3.94097	-0.28942	4.23685	1.61339	0.346443	0	0	0.284641	-0.0472094
I	85	S	Hydrophobic	Polar	6.02	5.68	-0.34	131	105	-26	166.7	89	-77.7	142	5.3	B	S	N	P	B	L	338.479	339.404	341.611	strand	interface	interface	0.19797	1	0	0	0	0	2.7464	13.3046	0.233709	0	6.84919	0	-3.46951	13.5861	-0.612934	-3.63869	0.706256	-0.301455	0	0	0	-0.0480454
I	85	T	Hydrophobic	Polar	6.02	5.6	-0.42	131	119	-12	166.7	116.1	-50.6	89	5.2	B	S	N	P	B	L	338.479	339.404	341.611	strand	interface	interface	0.19797	1	0	0	0	0	1.9367	9.17681	0.0648124	0	4.80946	0	-1.90766	9.50072	-0.335603	-2.50324	-0.235976	-0.167174	0	0	0	-0.0485279
I	85	V	Hydrophobic	Hydrophobic	6.02	5.61	-0.41	131	117	-14	166.7	140	-26.7	29	0.3	B	S	N	N	B	B	338.479	339.404	341.611	strand	interface	interface	0.19797	1	0	0	0	0	1.42201	6.45481	-5e-11	0	3.44787	0	-1.65465	6.54826	0.223718	-2.02729	-0.174494	0.132634	0	0	0	-0.04123
T	86	A	Polar	Hydrophobic	5.6	6	0.4	119	89	-30	116.1	88.6	-27.5	58	-2.5	S	S	P	N	L	B	337.989	337.633	339.434	strand	interface	interface	0.540698	1	0	0	0	0	0.0650469	0.583641	0.192983	4.84977	1.60538	0	-3.41182	1.23408	-0.0136791	-4.18601	0.800956	-0.488024	-0.142535	0	0	0
T	86	C	Polar	Special	5.6	5.07	-0.53	119	121	2	116.1	108.5	-7.6	149	-3.2	S	S	P	P	L	C	337.989	337.633	339.434	strand	interface	interface	0.540698	1	0	0	0	0	-0.0713424	-0.0153118	0.167194	3.79135	0.153132	0	-1.85695	-0.221712	0.10997	-1.87099	0.158012	-0.445324	-0.142523	0	0	0
T	86	D	Polar	negativeCharge	5.6	5.05	-0.55	119	133	14	116.1	111.1	-5	85	2.8	S	S	P	-	L	L	337.989	337.633	339.434	strand	interface	interface	0.540698	1	0	0	0	0	-0.148691	0.358248	0.633357	-1.06194	-0.467135	-0.501346	3.47851	-0.403518	-1.80002	-0.215677	1.15456	-0.409126	-0.100051	8.34e-08	-0.0494188	8.29e-08
T	86	G	Polar	Special	5.6	3.29	-2.31	119	75	-44	116.1	60.1	-56	59	-0.3	S	S	P	N	L	B	337.989	337.633	339.434	strand	interface	interface	0.540698	1	0	0	0	0	0.27041	1.85019	0.344431	4.79493	2.64323	0	-4.90051	2.54804	-0.0132214	-4.48442	1.44199	-0.524275	-0.123469	0	0	0
T	86	I	Polar	Hydrophobic	5.6	6.02	0.42	119	131	12	116.1	166.7	50.6	89	-5.2	S	B	P	N	L	B	337.989	337.633	339.434	strand	interface	interface	0.540698	1	0	0	0	2.38	-0.579416	-2.70633	-0.0437545	4.86394	-2.7043	0	1.68657	-4.90737	0.0319581	-1.64907	0.423256	-0.407571	0.0145962	0	0	0
T	86	K	Polar	PositiveCharge	5.6	9.74	4.14	119	146	27	116.1	168.6	52.5	78	3.2	S	B	P	+	L	L	337.989	337.633	339.434	strand	interface	interface	0.540698	1	0	0	0	1.36	-0.886307	-4.52591	0.167166	-3.92151	-0.619862	0.164249	-0.254929	-1.8641	0.172906	2.70609	-0.646775	-0.442939	-0.142447	0	0.0137916	0
T	86	L	Polar	Hydrophobic	5.6	9.71	4.11	119	131	12	116.1	166.7	50.6	92	-4.5	S	B	P	N	L	B	337.989	337.633	339.434	strand	interface	interface	0.540698	1	0	0	0	0.55	-0.274794	-1.15122	0.167188	4.85553	-1.27431	0	0.585957	-2.89915	0.0359914	-2.16988	-0.0369979	-0.415551	-0.14251	0	0	0
T	86	P	Polar	Special	5.6	6.3	0.7	119	115	-4	116.1	112.7	-3.4	38	0.9	S	P	P	N	L	P	337.989	337.633	339.434	strand	interface	interface	0.540698	1	0	0	0	0	0.771172	4.36543	0.167203	4.85395	0.422398	0	-4.17586	-1.05844	0.0369481	-3.06826	7.63645	-0.44896	-0.142513	0	0	0
T	86	R	Polar	PositiveCharge	5.6	6.34	0.74	119	174	55	116.1	173.4	57.3	71	3.8	S	B	P	+	L	L	337.989	337.633	339.434	strand	interface	interface	0.540698	1	0	0	0	1.36	-0.983231	-4.24224	-0.0452717	-9.26931	-1.74316	0.3243	1.79936	-2.33791	0.0953915	5.98922	0.998774	-0.078658	0.068009	0	0.0250184	0
T	86	S	Polar	Polar	5.6	5.68	0.08	119	105	-14	116.1	89	-27.1	58	0.1	S	S	P	P	L	L	337.989	337.633	339.434	strand	interface	interface	0.540698	1	0	0	0	0	-0.0786245	-0.439447	0.167184	-1.05138	1.10003	0	-1.64171	1.64656	-0.0032851	0.00959342	-0.198082	-0.468344	-0.111048	0	0	0
T	86	V	Polar	Hydrophobic	5.6	5.61	0.01	119	117	-2	116.1	140	23.9	69	-4.9	S	S	P	N	L	B	337.989	337.633	339.434	strand	interface	interface	0.540698	1	0	0	0	2.52	-0.203656	-0.735426	-0.116693	4.87069	-1.14695	0	0.654774	-2.12837	0.0257789	-2.74242	0.236242	-0.388478	0.0163169	0	0	0
T	86	W	Polar	Hydrophobic	5.6	5.89	0.29	119	204	85	116.1	227.8	111.7	128	0.2	S	B	P	N	L	B	337.989	337.633	339.434	strand	interface	interface	0.540698	1	0	0	0	0	-0.189528	-0.191504	0.125357	4.85658	-1.58891	0	0.715101	-2.58973	0.0360982	-2.48197	1.1947	-0.458732	-0.142464	0	0	0
T	86	Y	Polar	Hydrophobic	5.6	5.66	0.06	119	181	62	116.1	193.6	77.5	92	0.6	S	B	P	N	L	B	337.989	337.633	339.434	strand	interface	interface	0.540698	1	0	0	0	0	0.0291775	0.397003	0.167179	4.8599	0.110468	0	-1.0938	-0.358043	-0.00873357	-3.36328	0.076164	0.00714688	-0.142469	0	0	0
L	87	A	Hydrophobic	Hydrophobic	9.71	6	-3.71	131	89	-42	166.7	88.6	-78.1	96	2	B	S	N	N	B	B	340.862	341.804	343.652	loop	interface	interface	0.149254	2	0	0	0	0	1.58002	7.73983	0.251586	-0.0597986	6.76101	0	-4.53486	12.1601	-0.0770793	-6.19526	-0.461197	-0.104697	0.000352179	0	0	0
L	87	C	Hydrophobic	Special	9.71	5.07	-4.64	131	121	-10	166.7	108.5	-58.2	198	1.3	B	S	N	P	B	C	340.862	341.804	343.652	loop	interface	interface	0.149254	2	0	0	0	0	1.2538	6.59799	0.160049	-0.114686	4.06552	0	-3.09414	9.12314	0.0788993	-2.44344	-1.15966	-0.0176885	0	0	0	0
L	87	D	Hydrophobic	negativeCharge	9.71	5.05	-4.66	131	133	2	166.7	111.1	-55.6	172	7.3	B	S	N	-	B	L	340.862	341.804	343.652	loop	interface	interface	0.149254	2	0	0	0	0	2.21741	11.1144	0.199904	-0.0147284	3.75574	-2.06004	5.79826	9.6873	-0.0155609	-2.87295	-3.1984	-0.0412924	0	1.78e-15	-0.12384	0
L	87	H	Hydrophobic	PositiveCharge	9.71	7.59	-2.12	131	155	24	166.7	153.2	-13.5	99	7	B	B	N	+	B	L	340.862	341.804	343.652	loop	interface	interface	0.149254	2	0	0	0	0.12	2.26305	10.27	-0.30963	-0.565569	-0.443105	0	4.73451	3.4086	2.90122	-0.339412	0.415807	0.00364018	0.061043	-8.88e-16	-3.55e-15	0.463945
L	87	I	Hydrophobic	Hydrophobic	9.71	6.02	-3.69	131	131	0	166.7	166.7	0	5	-0.7	B	B	N	N	B	B	340.862	341.804	343.652	loop	interface	interface	0.149254	2	0	0	0	0	1.21692	5.84265	-0.127509	-0.150932	-0.252499	0	0.57695	-0.463355	5.35855	-0.120976	1.02938	-0.00695435	0.104908	0	0	0
L	87	M	Hydrophobic	Hydrophobic	9.71	5.74	-3.97	131	149	18	166.7	162.9	-3.8	15	1.9	B	B	N	N	B	B	340.862	341.804	343.652	loop	interface	interface	0.149254	2	0	0	0	0	-0.317048	-1.60515	0.000624537	-0.0113903	-2.67881	0	0.776695	-3.1131	0.0782767	2.04525	1.2647	0.0326081	0	0	0	0
L	87	N	Hydrophobic	Polar	9.71	5.47	-4.24	131	132	1	166.7	114.1	-52.6	153	7.3	B	S	N	P	B	L	340.862	341.804	343.652	loop	interface	interface	0.149254	2	0	0	0	0	1.49265	6.17501	-2.10178	-2.34312	3.26945	0	1.47899	9.74673	0.229071	-1.93089	-2.25837	0.0849475	0.0175072	0	0	0
L	87	P	Hydrophobic	Special	9.71	6.3	-3.41	131	115	-16	166.7	112.7	-54	98	5.4	B	P	N	N	B	P	340.862	341.804	343.652	loop	interface	interface	0.149254	2	0	0	0	0	5.06931	28.0368	6.77456	3.57765	3.65847	1.71e-06	-3.45261	5.8792	14.6162	-5.76322	2.60089	0.141594	0.00164269	8.34e-08	7.78e-10	0.00411712
L	87	Q	Hydrophobic	Polar	9.71	6.24	-3.47	131	146	15	166.7	143.8	-22.9	113	7.3	B	B	N	P	B	L	340.862	341.804	343.652	loop	interface	interface	0.149254	2	0	0	0	0	1.60734	7.3878	-1.46907	-2.58609	1.90826	0	1.60558	6.92262	-0.148326	0.819137	0.368487	-0.0328015	0.0192658	0	0	0
L	87	R	Hydrophobic	PositiveCharge	9.71	6.34	-3.37	131	174	43	166.7	173.4	6.7	102	8.3	B	B	N	+	B	L	340.862	341.804	343.652	loop	interface	interface	0.149254	2	0	0	0	1.36	1.0164	3.9962	-3.62923	-3.8984	1.03577	-0.090051	1.12161	5.2882	-0.0593906	2.86818	0.829715	0.352457	0	-8.88e-16	0.177348	0
L	87	S	Hydrophobic	Polar	9.71	5.68	-4.03	131	105	-26	166.7	89	-77.7	145	4.6	B	S	N	P	B	L	340.862	341.804	343.652	loop	interface	interface	0.149254	2	0	0	0	0	1.43166	6.93356	-2.91119	-3.22334	6.21058	0	-1.80769	14.2027	-0.0949066	-3.4425	-1.89843	-0.101638	0.0466029	0	0	0
L	87	T	Hydrophobic	Polar	9.71	5.6	-4.11	131	119	-12	166.7	116.1	-50.6	92	4.5	B	S	N	P	B	L	340.862	341.804	343.652	loop	interface	interface	0.149254	2	0	0	0	0	2.56242	12.8826	-1.41879	-1.75331	4.34644	0	0.279964	10.4699	0.269094	-3.0738	3.41998	0.343081	-0.000318648	0	0	0
L	87	V	Hydrophobic	Hydrophobic	9.71	5.61	-4.1	131	117	-14	166.7	140	-26.7	32	-0.4	B	S	N	N	B	B	340.862	341.804	343.652	loop	interface	interface	0.149254	2	0	0	0	0	2.38773	11.0082	0.0464579	-0.151417	2.67392	0	-0.77195	5.31407	5.77005	-3.31333	1.44628	-0.00592258	0.0979224	0	0	0
L	87	Y	Hydrophobic	Hydrophobic	9.71	5.66	-4.05	131	181	50	166.7	193.6	26.9	36	5.1	B	B	N	N	B	B	340.862	341.804	343.652	loop	interface	interface	0.149254	2	0	0	0	0	0.205011	6.96576	0.151106	-2.22322	-2.7956	0.230207	1.03311	-1.92935	12.5252	0.0155854	0.00500313	-0.0462982	0	0	0	0
G	88	A	Special	Hydrophobic	3.29	6	2.71	75	89	14	60.1	88.6	28.5	60	-2.2	S	S	N	N	B	B	340.252	339.409	340.325	loop	interface	interface	0.317308	1	0	0	0	0	3.41111	16.7575	-0.339373	-0.192254	-3.34132	0.00491219	3.16906	-5.2979	17.8763	0.560832	4.26063	0.0566561	1.02732	0	0	0
G	88	E	Special	negativeCharge	3.29	3.22	-0.07	75	147	72	60.1	138.4	78.3	98	3.1	S	B	N	-	B	L	340.252	339.409	340.325	loop	interface	interface	0.317308	1	0	0	0	0	13.0163	63.7214	0.154689	-4.48979	-10.4542	-5.38491	24.0723	-11.8184	49.1895	10.4517	11.2084	1.094	2.55433	-0.302016	7.78e-10	8.29e-08
G	88	F	Special	Hydrophobic	3.29	3.32	0.03	75	165	90	60.1	189.9	129.8	153	-3.2	S	B	N	N	B	B	340.252	339.409	340.325	loop	interface	interface	0.317308	1	0	0	0	28.46	17.1764	75.7808	-2.72928	-2.51972	-13.5825	0.700271	12.5487	-19.5737	78.7437	5.87243	16.1284	0.192249	4.12639	0.000148617	8.11e-05	8.29e-08
G	88	H	Special	PositiveCharge	3.29	7.59	4.3	75	155	80	60.1	153.2	93.1	98	2.8	S	B	N	+	B	L	340.252	339.409	340.325	loop	interface	interface	0.317308	1	0	0	0	0.12	20.3757	87.4763	-0.351647	-0.214755	-12.4317	0.0197254	19.6577	-14.3943	76.3584	6.40937	11.7034	0.129601	3.5289	-2.66e-15	0	0.590488
G	88	L	Special	Hydrophobic	3.29	9.71	6.42	75	131	56	60.1	166.7	106.6	138	-4.2	S	B	N	N	B	B	340.252	339.409	340.325	loop	interface	interface	0.317308	1	0	0	0	11.99	15.5049	77.945	0.0534434	1.28884	-12.111	0.0190326	13.5855	-19.7231	74.7314	6.13305	11.7807	2.18708	3.87688	8.34e-08	7.78e-10	8.29e-08
G	88	P	Special	Special	3.29	6.3	3.01	75	115	40	60.1	112.7	52.6	42	1.2	S	P	N	N	B	P	340.252	339.409	340.325	loop	interface	interface	0.317308	1	0	0	0	0	12.4732	60.8425	-0.567497	-0.174007	-6.04334	0.00326726	4.00261	-10.7193	64.4417	2.018	7.79121	0.0898754	1.79366	0	0	0
G	88	Q	Special	Polar	3.29	6.24	2.95	75	146	71	60.1	143.8	83.7	87	3.1	S	B	N	P	B	L	340.252	339.409	340.325	loop	interface	interface	0.317308	1	0	0	0	0	14.6174	70.6335	-0.898932	0.3362	-10.5587	0.019473	16.7731	-11.9242	52.3018	8.55681	12.3144	3.71349	2.95128	8.34e-08	7.78e-10	8.29e-08
G	88	R	Special	PositiveCharge	3.29	6.34	3.05	75	174	99	60.1	173.4	113.3	125	4.1	S	B	N	+	B	L	340.252	339.409	340.325	loop	interface	interface	0.317308	1	0	0	0	1.36	15.7928	76.1337	-4.65588	-4.11152	-14.0077	3.89947	22.0014	-13.634	61.1019	11.1735	12.1493	1.75412	3.75879	0.463118	3.55e-15	0
G	88	S	Special	Polar	3.29	5.68	2.39	75	105	30	60.1	89	28.9	56	0.4	S	S	N	P	B	L	340.252	339.409	340.325	loop	interface	interface	0.317308	1	0	0	0	0	7.18151	36.0939	-2.61951	-2.4764	-4.45861	0.00563483	7.91549	-3.08305	23.8592	3.29265	13.611	0.0474975	1.4009	0	0	0
G	88	T	Special	Polar	3.29	5.6	2.31	75	119	44	60.1	116.1	56	59	0.3	S	S	N	P	B	L	340.252	339.409	340.325	loop	interface	interface	0.317308	1	0	0	0	0	9.35728	47.1378	-2.64798	-1.56112	-7.07459	0.00747391	11.8454	-8.49009	41.4811	3.15077	10.2548	0.172055	2.34682	8.34e-08	7.78e-10	8.29e-08
G	88	V	Special	Hydrophobic	3.29	5.61	2.32	75	117	42	60.1	140	79.9	109	-4.6	S	S	N	N	B	B	340.252	339.409	340.325	loop	interface	interface	0.317308	1	0	0	0	26.87	12.4319	57.2601	0.0263439	1.31881	-9.09447	0.00748547	9.79422	-15.1772	56.3335	2.9542	11.019	0.0782746	2.97082	8.34e-08	7.77e-10	8.29e-08
G	88	Y	Special	Hydrophobic	3.29	5.66	2.37	75	181	106	60.1	193.6	133.5	147	0.9	S	B	N	N	B	B	340.252	339.409	340.325	loop	interface	interface	0.317308	1	0	0	0	6.67	12.907	82.6749	-3.14979	-1.83619	-13.4036	0.713536	13.5314	-18.6104	83.1319	6.14218	16.1463	0.00647559	4.08815	0.00317166	-0.000105962	8.29e-08
N	89	A	Polar	Hydrophobic	5.47	6	0.53	132	89	-43	114.1	88.6	-25.5	111	-5.3	S	S	P	N	L	B	338.104	338.946	340.58	loop	interface	interface	0.789744	5	1	0	0	1.41	0.194358	0.881242	-0.0471878	-0.0795993	0.558292	0.000174718	-0.666889	0.831241	4.79e-05	-0.221195	1.25651	-0.750149	-0.164739	0	0	0
N	89	G	Polar	Special	5.47	3.29	-2.18	132	75	-57	114.1	60.1	-54	80	-3.1	S	S	P	N	L	B	338.104	338.946	340.58	loop	interface	interface	0.789744	5	1	0	0	0	-0.233017	-1.1789	-0.0289213	0.0512307	0.895019	-0.000337232	-1.39722	1.1057	-5.07e-05	-0.235014	-0.179704	-1.3896	-0.201897	0	0	0
N	89	L	Polar	Hydrophobic	5.47	9.71	4.24	132	131	-1	114.1	166.7	52.6	153	-7.3	S	B	P	N	L	B	338.104	338.946	340.58	loop	interface	interface	0.789744	5	1	0	0	21.24	0.0468451	0.219811	0	0	-0.876629	0.000622162	0.639285	-1.49285	0.000170508	0.616009	2.04831	-0.715108	0.267001	0	0	0
N	89	P	Polar	Special	5.47	6.3	0.83	132	115	-17	114.1	112.7	-1.4	91	-1.9	S	P	P	N	L	P	338.104	338.946	340.58	loop	interface	interface	0.789744	5	1	0	0	0	-0.976707	-4.54826	-0.144504	-0.205069	-1.48966	0.00714183	0.270123	-2.49081	0.000451979	1.08762	-0.210694	-1.37286	-3.29034	0	0	0
N	89	Q	Polar	Polar	5.47	6.24	0.77	132	146	14	114.1	143.8	29.7	46	0	S	B	P	P	L	L	338.104	338.946	340.58	loop	interface	interface	0.789744	5	1	0	0	0	0.137384	0.300871	-0.01134	-1.23871	0.00113764	0.000866528	0.0742689	0.156982	2.41e-06	0.683985	1.28551	-0.65183	-0.0696869	0	0	0
N	89	T	Polar	Polar	5.47	5.6	0.13	132	119	-13	114.1	116.1	2	65	-2.8	S	S	P	P	L	L	338.104	338.946	340.58	loop	interface	interface	0.789744	5	1	0	0	0	0.391166	1.67004	-0.032154	-0.0625253	0.120091	0.00319673	0.144319	0.447695	8.25e-05	0.0786723	1.83721	-0.866549	-0.0327856	0	0	0
S	90	A	Polar	Hydrophobic	5.68	6	0.32	105	89	-16	89	88.6	-0.4	99	-2.6	S	S	P	N	L	B	338.665	339.201	341.008	loop	interface	interface	0.109677	1	0	0	0	0	1.05454	5.05293	6.57053	6.17203	1.69675	-0.00148694	-3.5118	-1.34815	0.0551555	-2.76845	-0.360504	-1.45114	-0.160631	0	0	0
S	90	G	Polar	Special	5.68	3.29	-2.39	105	75	-30	89	60.1	-28.9	56	-0.4	S	S	P	N	L	B	338.665	339.201	341.008	loop	interface	interface	0.109677	1	0	0	0	0	1.75512	8.24038	6.62736	6.26558	4.57637	-0.00921951	-7.54251	3.15611	-0.000817405	-3.33371	0.090426	-1.5892	-0.161274	0	0	0
S	90	P	Polar	Special	5.68	6.3	0.62	105	115	10	89	112.7	23.7	74	0.8	S	P	P	N	L	P	338.665	339.201	341.008	loop	interface	interface	0.109677	1	0	0	0	0	5.72894	27.9817	6.44203	6.13101	-1.24926	0.00844329	-1.77314	-6.06913	18.6099	-0.907286	8.22929	-1.44023	-3.56949	0	0	0
S	90	T	Polar	Polar	5.68	5.6	-0.08	105	119	14	89	116.1	27.1	58	-0.1	S	S	P	P	L	L	338.665	339.201	341.008	loop	interface	interface	0.109677	1	0	0	0	0	0.0495977	0.644175	0.425221	0.429039	-1.31756	0.00865769	1.78688	-2.70548	1.35379	0.318385	0.746202	-0.400965	-0.158735	0	0	0
T	91	A	Polar	Hydrophobic	5.6	6	0.4	119	89	-30	116.1	88.6	-27.5	58	-2.5	S	S	P	N	L	B	337.116	336.508	337.525	strand	interface	interface	0.476744	2	0	0	0	0	0.558315	3.21866	0.17709	4.84493	2.45375	0	-3.48122	2.99988	-0.689979	-5.13601	2.20639	-0.156178	-0.000849914	0	0	0
T	91	C	Polar	Special	5.6	5.07	-0.53	119	121	2	116.1	108.5	-7.6	149	-3.2	S	S	P	P	L	C	337.116	336.508	337.525	strand	interface	interface	0.476744	2	0	0	0	-0.01	0.161441	1.36893	0.0505244	3.75025	-0.211102	0	-1.14729	0.0952034	-0.663043	-1.81071	1.35193	-0.04683	-0.0501363	0	0	0
T	91	E	Polar	negativeCharge	5.6	3.22	-2.38	119	147	28	116.1	138.4	22.3	65	2.8	S	B	P	-	L	L	337.116	336.508	337.525	strand	interface	interface	0.476744	2	0	0	0	-0.2	-0.114968	0.72331	0.131956	-1.41235	-0.00433077	-0.354956	0.486499	-0.0920699	-2.00021	2.75197	1.67724	-0.435268	0.126375	8.34e-08	-0.025176	8.29e-08
T	91	H	Polar	PositiveCharge	5.6	7.59	1.99	119	155	36	116.1	153.2	37.1	47	2.5	S	B	P	+	L	L	337.116	336.508	337.525	strand	interface	interface	0.476744	2	0	0	0	0.14	0.622644	3.90487	0.136731	3.60375	1.28542	0	-1.32413	1.96287	-0.681277	-3.29282	1.993	-0.0225834	0.126572	0	0	0.243912
T	91	L	Polar	Hydrophobic	5.6	9.71	4.11	119	131	12	116.1	166.7	50.6	92	-4.5	S	B	P	N	L	B	337.116	336.508	337.525	strand	interface	interface	0.476744	2	0	0	0	0	-0.234253	-1.29221	0.409044	6.38711	-3.59004	0.00123696	2.76544	-6.55043	-0.71481	-1.40144	0.755666	0.646024	-0.0413454	8.34e-08	7.77e-10	8.29e-08
T	91	N	Polar	Polar	5.6	5.47	-0.13	119	132	13	116.1	114.1	-2	65	2.8	S	S	P	P	L	L	337.116	336.508	337.525	strand	interface	interface	0.476744	2	0	0	0	-0.28	0.722821	3.63994	-0.0170823	-0.131589	0.986964	0	-0.503881	1.87631	-0.686065	-0.431887	2.5883	-0.0411298	0.1852	0	0	0
T	91	P	Polar	Special	5.6	6.3	0.7	119	115	-4	116.1	112.7	-3.4	38	0.9	S	P	P	N	L	P	337.116	336.508	337.525	strand	interface	interface	0.476744	2	0	0	0	0	1.94061	10.3216	0.0348113	4.73053	2.34364	0	-4.44528	2.81239	-0.704842	-4.55885	10.2156	-0.106384	0.227198	0	0	0
T	91	Q	Polar	Polar	5.6	6.24	0.64	119	146	27	116.1	143.8	27.7	42	2.8	S	B	P	P	L	L	337.116	336.508	337.525	strand	interface	interface	0.476744	2	0	0	0	0	-0.290264	-0.326297	0.555761	0.616983	-1.61222	0.00176384	2.22174	-1.9375	-2.00823	2.22113	-0.107555	-0.278173	-0.0292586	8.34e-08	7.77e-10	8.29e-08
T	91	R	Polar	PositiveCharge	5.6	6.34	0.74	119	174	55	116.1	173.4	57.3	71	3.8	S	B	P	+	L	L	337.116	336.508	337.525	strand	interface	interface	0.476744	2	0	0	0	1.52	-0.388186	-1.63372	-0.29623	-3.3184	-2.22635	0.362066	3.21322	-2.52011	-1.59825	3.62473	1.11502	-0.0107436	-0.00131229	8.34e-08	0.021326	8.29e-08
T	91	S	Polar	Polar	5.6	5.68	0.08	119	105	-14	116.1	89	-27.1	58	0.1	S	S	P	P	L	L	337.116	336.508	337.525	strand	interface	interface	0.476744	2	0	0	0	-0.25	0.280057	1.6094	0.145074	-1.46255	2.02712	0	-1.61527	3.86801	-0.702345	-0.232782	-0.26952	-0.148329	0.0376938	0	0	0
I	92	A	Hydrophobic	Hydrophobic	6.02	6	-0.02	131	89	-42	166.7	88.6	-78.1	94	2.7	B	S	N	N	B	B	338.112	338.972	341.921	strand	interface	interface	0.137056	1	0	0	0	0.57	1.64009	8.28313	0.251421	0.100699	7.42617	0	-6.02757	12.1363	-0.815249	-4.58929	1.10078	-1.26196	0	0	0	-0.0382058
I	92	C	Hydrophobic	Special	6.02	5.07	-0.95	131	121	-10	166.7	108.5	-58.2	198	2	B	S	N	P	B	C	338.112	338.972	341.921	strand	interface	interface	0.137056	1	0	0	0	0.58	0.190647	1.04504	0.0740152	-6.42449	4.23122	0	-4.36134	8.37885	-0.715339	0.374162	0.683272	-1.14556	0	0	0	-0.0497354
I	92	F	Hydrophobic	Hydrophobic	6.02	3.32	-2.7	131	165	34	166.7	189.9	23.2	21	1.7	B	B	N	N	B	B	338.112	338.972	341.921	strand	interface	interface	0.137056	1	0	0	0	0.09	4.03933	18.6328	0.0710394	-0.678722	-1.63697	0.100606	0.720633	-0.720216	22.8186	-0.957375	-0.0251766	-1.06522	0.0166017	0	0	0.00558922
I	92	G	Hydrophobic	Special	6.02	3.29	-2.73	131	75	-56	166.7	60.1	-106.6	135	4.9	B	S	N	N	B	B	338.112	338.972	341.921	strand	interface	interface	0.137056	1	0	0	0	0.57	2.90926	14.2064	0.36184	0.0929326	10.3386	0	-8.04131	17.1879	-0.845481	-4.99135	1.45928	-1.28351	0	0	0	-0.0725436
I	92	H	Hydrophobic	PositiveCharge	6.02	7.59	1.57	131	155	24	166.7	153.2	-13.5	94	7.7	B	B	N	+	B	L	338.112	338.972	341.921	strand	interface	interface	0.137056	1	0	0	0	0.69	2.01543	8.7258	0.136504	-3.48601	0.26833	5.68e-14	4.31554	4.94832	2.8823	-0.479883	0.775096	-1.11148	0.0163322	0	0	0.477083
I	92	L	Hydrophobic	Hydrophobic	6.02	9.71	3.69	131	131	0	166.7	166.7	0	5	0.7	B	B	N	N	B	B	338.112	338.972	341.921	strand	interface	interface	0.137056	1	0	0	0	-0.9	-0.595346	-2.7039	0.0050744	-0.161703	0.340702	0	-1.29088	-0.102268	-0.405347	0.0694627	-0.0516617	-1.12452	0.0178758	0	0	0.0172392
I	92	N	Hydrophobic	Polar	6.02	5.47	-0.55	131	132	1	166.7	114.1	-52.6	149	8	B	S	N	P	B	L	338.112	338.972	341.921	strand	interface	interface	0.137056	1	0	0	0	0.57	1.10902	5.64139	0.143743	-6.29736	3.74244	0	0.502988	9.48692	-0.7367	-1.22343	1.29962	-1.2479	0	0	0	-0.028939
I	92	P	Hydrophobic	Special	6.02	6.3	0.28	131	115	-16	166.7	112.7	-54	95	6.1	B	P	N	N	B	P	338.112	338.972	341.921	strand	interface	interface	0.137056	1	0	0	0	0.57	4.36239	20.3795	6.19836	-0.252218	3.69451	-5.68e-14	-4.34846	5.07599	11.5069	-3.07529	2.67337	-1.04284	0	0	0	-0.0508687
I	92	Q	Hydrophobic	Polar	6.02	6.24	0.22	131	146	15	166.7	143.8	-22.9	109	8	B	B	N	P	B	L	338.112	338.972	341.921	strand	interface	interface	0.137056	1	0	0	0	0.57	1.31288	6.68021	0.155358	-3.0195	1.77416	0	2.44398	6.6248	-0.697475	0.632496	0.041024	-1.27611	0.0178758	0	0	0.00146832
I	92	R	Hydrophobic	PositiveCharge	6.02	6.34	0.32	131	174	43	166.7	173.4	6.7	97	9	B	B	N	+	B	L	338.112	338.972	341.921	strand	interface	interface	0.137056	1	0	0	0	1.47	1.22053	5.90597	-3.2019	-7.86534	-0.430116	1.0228	5.10701	4.58898	-0.615879	4.1289	3.89795	-0.676459	0	0	0	-0.0499807
I	92	S	Hydrophobic	Polar	6.02	5.68	-0.34	131	105	-26	166.7	89	-77.7	142	5.3	B	S	N	P	B	L	338.112	338.972	341.921	strand	interface	interface	0.137056	1	0	0	0	0.57	1.59205	10.3241	0.212028	-2.37741	6.62714	0	-2.79423	13.5615	-0.690393	-2.71295	-0.24006	-1.21159	0	0	0	-0.0498836
I	92	T	Hydrophobic	Polar	6.02	5.6	-0.42	131	119	-12	166.7	116.1	-50.6	89	5.2	B	S	N	P	B	L	338.112	338.972	341.921	strand	interface	interface	0.137056	1	0	0	0	0.57	0.809766	4.96324	0.380613	-5.09546	4.36812	0	-0.24206	9.593	-0.741024	-1.93603	-0.662112	-0.683004	0	0	0	-0.0187974
I	92	V	Hydrophobic	Hydrophobic	6.02	5.61	-0.41	131	117	-14	166.7	140	-26.7	29	0.3	B	S	N	N	B	B	338.112	338.972	341.921	strand	interface	interface	0.137056	1	0	0	0	0.09	0.169842	0.463574	0.0514444	0.0902692	1.68026	0	-2.04094	2.23287	0.145109	-1.89749	-0.0899303	0.30777	0	0	0	-0.0157836
I	92	W	Hydrophobic	Hydrophobic	6.02	5.89	-0.13	131	204	73	166.7	227.8	61.1	61	5.4	B	B	N	N	B	B	338.112	338.972	341.921	strand	interface	interface	0.137056	1	0	0	0	0.24	2.64503	13.2939	1.86003	3.33816	-1.56655	0.00136018	5.67168	1.0701	5.5813	-1.79999	0.552063	-1.39817	0.00574645	8.34e-08	7.77e-10	-0.0160584
T	93	A	Polar	Hydrophobic	5.6	6	0.4	119	89	-30	116.1	88.6	-27.5	58	-2.5	S	S	P	N	L	B	336.081	335.746	337.349	strand	interface	interface	0.622093	4	0	0	0	1	0.0236079	0.279051	0	0	0.969077	0	-1.77027	0.866465	-0.038357	-0.435207	0.748646	-0.0613065	0.10232	0	0	0
T	93	E	Polar	negativeCharge	5.6	3.22	-2.38	119	147	28	116.1	138.4	22.3	65	2.8	S	B	P	-	L	L	336.081	335.746	337.349	strand	interface	interface	0.622093	4	0	0	0	0.75	-0.323526	-1.70436	0	0	-0.655392	-0.181102	-0.019447	-1.32079	-0.0142243	0.509998	-0.0230513	-0.000344609	0.0460262	0	1.07e-14	0
T	93	F	Polar	Hydrophobic	5.6	3.32	-2.28	119	165	46	116.1	189.9	73.8	103	-3.5	S	B	P	N	L	B	336.081	335.746	337.349	strand	interface	interface	0.622093	4	0	0	0	3	-0.256232	-1.54104	-0.097159	0	-2.38386	0	1.64828	-3.58672	0.817416	1.41416	0.557723	0.0891172	0.171448	0	0	0
T	93	G	Polar	Special	5.6	3.29	-2.31	119	75	-44	116.1	60.1	-56	59	-0.3	S	S	P	N	L	B	336.081	335.746	337.349	strand	interface	interface	0.622093	4	0	0	0	0.64	0.389413	1.608	0	0	2.05655	0	-3.19993	2.25935	-0.0572255	-0.514107	1.16101	-0.0976399	-0.00287261	0	0	0
T	93	H	Polar	PositiveCharge	5.6	7.59	1.99	119	155	36	116.1	153.2	37.1	47	2.5	S	B	P	+	L	L	336.081	335.746	337.349	strand	interface	interface	0.622093	4	0	0	0	0.96	-0.450499	-0.782501	-0.0345582	-1.17287	-2.67733	-8.53e-14	3.4729	-3.02998	0.179186	1.70801	0.406845	0.113503	0.0460262	0	3.55e-15	0.251797
T	93	L	Polar	Hydrophobic	5.6	9.71	4.11	119	131	12	116.1	166.7	50.6	92	-4.5	S	B	P	N	L	B	336.081	335.746	337.349	strand	interface	interface	0.622093	4	0	0	0	0.23	-0.509099	-2.53431	0	0	-2.1749	0	1.71101	-3.6247	0.0504833	1.0275	0.360362	0.115935	0.0460262	0	0	0
T	93	N	Polar	Polar	5.6	5.47	-0.13	119	132	13	116.1	114.1	-2	65	2.8	S	S	P	P	L	L	336.081	335.746	337.349	strand	interface	interface	0.622093	4	0	0	0	0	-0.195243	1.02676	-0.413487	-2.73588	-1.33804	0.000773128	3.11816	-1.13306	-1.41727	2.62067	2.43076	-0.105873	0.0491254	8.34e-08	7.77e-10	8.3e-08
T	93	P	Polar	Special	5.6	6.3	0.7	119	115	-4	116.1	112.7	-3.4	38	0.9	S	P	P	N	L	P	336.081	335.746	337.349	strand	interface	interface	0.622093	4	0	0	0	1	1.36162	6.90928	0	0	0.0218552	0	-2.17599	-0.950099	0.0729245	0.403228	9.48367	0.0536887	-0.03657	0	0	0
T	93	Q	Polar	Polar	5.6	6.24	0.64	119	146	27	116.1	143.8	27.7	42	2.8	S	B	P	P	L	L	336.081	335.746	337.349	strand	interface	interface	0.622093	4	0	0	0	1	-0.693916	-2.23808	0	-2.14612	-0.699666	0	0.248271	-1.20328	-0.0151698	1.57229	0.000404705	0.00520172	0.0460262	0	0	0
T	93	R	Polar	PositiveCharge	5.6	6.34	0.74	119	174	55	116.1	173.4	57.3	71	3.8	S	B	P	+	L	L	336.081	335.746	337.349	strand	interface	interface	0.622093	4	0	0	0	2.51	-1.39087	-4.99452	0	-8.74488	-1.62994	0.18067	1.4748	-2.21656	0.0131706	5.36551	0.124334	0.46503	0.0460262	0	-0.0266438	0
T	93	S	Polar	Polar	5.6	5.68	0.08	119	105	-14	116.1	89	-27.1	58	0.1	S	S	P	P	L	L	336.081	335.746	337.349	strand	interface	interface	0.622093	4	0	0	0	-0.29	-0.248933	0.681501	-0.807984	-3.09488	0.277337	0.00234004	1.1299	1.19218	-1.44458	2.24312	1.43208	-0.248017	0.0543929	8.34e-08	7.77e-10	8.3e-08
T	93	V	Polar	Hydrophobic	5.6	5.61	0.01	119	117	-2	116.1	140	23.9	69	-4.9	S	S	P	N	L	B	336.081	335.746	337.349	strand	interface	interface	0.622093	4	0	0	0	2.85	-0.14701	-0.517964	0	0	-1.61511	0	1.75568	-2.36543	0.377909	0.67785	0.60152	0.0496102	0.128751	0	0	0
T	93	Y	Polar	Hydrophobic	5.6	5.66	0.06	119	181	62	116.1	193.6	77.5	92	0.6	S	B	P	N	L	B	336.081	335.746	337.349	strand	interface	interface	0.622093	4	0	0	0	0.49	-0.175669	-1.11311	-0.0969193	0	-2.18301	0	1.60451	-3.19351	0.777566	1.32071	0.552743	0.1048	0.18616	0	0	0
T	94	A	Polar	Hydrophobic	5.6	6	0.4	119	89	-30	116.1	88.6	-27.5	58	-2.5	S	S	P	N	L	B	336.818	337.11	339.229	strand	interface	interface	0.0872093	1	0	0	0	-1.69	1.12295	6.33739	2.70141	7.10349	4.77432	0.0179322	-6.6824	4.80854	-2.22972	-3.58571	-0.307412	-0.265595	-1.49936	8.34e-08	7.77e-10	0.00253043
T	94	C	Polar	Special	5.6	5.07	-0.53	119	121	2	116.1	108.5	-7.6	149	-3.2	S	S	P	P	L	C	336.818	337.11	339.229	strand	interface	interface	0.0872093	1	0	0	0	-0.05	0.79344	5.46186	1.94135	6.33897	1.35397	0.0137675	-4.56374	1.27536	-1.63296	0.438112	0.46951	-0.175493	-0.284522	8.34e-08	7.77e-10	0.00300153
T	94	D	Polar	negativeCharge	5.6	5.05	-0.55	119	133	14	116.1	111.1	-5	85	2.8	S	S	P	-	L	L	336.818	337.11	339.229	strand	interface	interface	0.0872093	1	0	0	0	-0.83	1.22799	12.9537	3.09049	0.687966	-0.0539116	-5.6028	11.7208	1.31348	-1.26277	-0.557346	1.64346	0.0572617	-0.984457	8.34e-08	0.197362	1.71969
T	94	N	Polar	Polar	5.6	5.47	-0.13	119	132	13	116.1	114.1	-2	65	2.8	S	S	P	P	L	L	336.818	337.11	339.229	strand	interface	interface	0.0872093	1	0	0	0	-0.02	1.07189	7.4938	2.94895	1.95961	-0.188898	0.0169702	1.73453	1.1716	-1.91055	0.366576	1.54155	-0.23511	-1.35617	8.34e-08	7.77e-10	0.088576
T	94	P	Polar	Special	5.6	6.3	0.7	119	115	-4	116.1	112.7	-3.4	38	0.9	S	P	P	N	L	P	336.818	337.11	339.229	strand	interface	interface	0.0872093	1	0	0	0	-1.24	2.72313	14.5173	6.66543	7.06665	0.959586	0.0099923	-4.72953	-1.55007	2.7189	-1.76987	5.33275	-0.203237	-1.45885	8.34e-08	7.78e-10	0.0166764
T	94	Q	Polar	Polar	5.6	6.24	0.64	119	146	27	116.1	143.8	27.7	42	2.8	S	B	P	P	L	L	336.818	337.11	339.229	strand	interface	interface	0.0872093	1	0	0	0	0.05	1.64576	10.0001	3.16146	3.731	-2.67272	0.0166858	5.18436	-2.12323	-1.78805	3.73932	0.595375	0.0560414	-0.54392	8.34e-08	7.76e-10	0.0998198
T	94	R	Polar	PositiveCharge	5.6	6.34	0.74	119	174	55	116.1	173.4	57.3	71	3.8	S	B	P	+	L	L	336.818	337.11	339.229	strand	interface	interface	0.0872093	1	0	0	0	0.83	3.00542	16.5911	2.44055	2.05996	-6.7238	0.316341	12.953	-4.89245	1.48466	6.71039	1.61906	0.647869	-0.00892721	8.34e-08	-0.131136	0.106691
T	94	S	Polar	Polar	5.6	5.68	0.08	119	105	-14	116.1	89	-27.1	58	0.1	S	S	P	P	L	L	336.818	337.11	339.229	strand	interface	interface	0.0872093	1	0	0	0	-0.28	0.601706	3.67706	0.0270929	-0.677535	3.19423	0.0112704	-2.86504	5.64021	-0.653799	-0.218741	-0.613774	-0.166851	-0.759238	0	0	0
T	94	V	Polar	Hydrophobic	5.6	5.61	0.01	119	117	-2	116.1	140	23.9	69	-4.9	S	S	P	N	L	B	336.818	337.11	339.229	strand	interface	interface	0.0872093	1	0	0	0	2.5	0.14621	1.56214	2.93843	7.25024	-1.06231	0.00257852	-0.729048	-3.80514	-1.72205	-0.875373	-0.247202	-0.24214	-0.361844	8.34e-08	7.81e-10	0.0541688
Q	95	A	Polar	Hydrophobic	6.24	6	-0.24	146	89	-57	143.8	88.6	-55.2	91	-5.3	B	S	P	N	L	B	334.582	333.279	335.572	loop	interface	interface	0.648889	4	0	0	0	0.49	0.2964	1.64199	0	0	1.02733	-0.0073143	-1.3658	1.34223	-0.0216494	-0.23383	0.92354	-0.0225052	-0.457175	0	0	0
Q	95	F	Polar	Hydrophobic	6.24	3.32	-2.92	146	165	19	143.8	189.9	46.1	116	-6.3	B	B	P	N	L	B	334.582	333.279	335.572	loop	interface	interface	0.648889	4	0	0	0	4.98	-0.1479	-0.717361	0	0	-0.801767	-0.0276409	0.333503	-1.34808	-0.023597	0.547245	0.629868	-0.0268892	0.0501719	0	0	0
Q	95	L	Polar	Hydrophobic	6.24	9.71	3.47	146	131	-15	143.8	166.7	22.9	113	-7.3	B	B	P	N	L	B	334.582	333.279	335.572	loop	interface	interface	0.648889	4	0	0	0	3.02	-0.231739	-1.17878	-0.0190438	0	-1.22165	2.84e-14	1.48835	-1.7326	0.0651316	0.418727	-0.16384	-0.0138441	0.934889	0	0	0
Q	95	N	Polar	Polar	6.24	5.47	-0.77	146	132	-14	143.8	114.1	-29.7	46	0	B	S	P	P	L	L	334.582	333.279	335.572	loop	interface	interface	0.648889	4	0	0	0	1.54	-0.189771	-1.21456	-0.468345	-0.505845	0.263995	2.84e-14	-0.168119	0.468252	-0.000759059	0.520661	-1.38238	0.0579808	0.157515	0	0	0
Q	95	P	Polar	Special	6.24	6.3	0.06	146	115	-31	143.8	112.7	-31.1	76	-1.9	B	P	P	N	L	P	334.582	333.279	335.572	loop	interface	interface	0.648889	4	0	0	0	1.27	1.10586	5.41082	-0.00156094	0	0.0937462	0.0144516	-1.50903	-0.18575	-0.00417493	0.333842	6.64165	0.0276458	0.18587	0	0	0
Q	95	R	Polar	PositiveCharge	6.24	6.34	0.1	146	174	28	143.8	173.4	29.6	43	1	B	B	P	+	L	L	334.582	333.279	335.572	loop	interface	interface	0.648889	4	0	0	0	8.82	-0.262565	-1.21411	0	0	-0.450104	-0.0675296	0.0215675	-0.806478	0.0142591	0.65486	-0.469503	0.328959	0.0840414	0	-0.440143	0
Q	95	S	Polar	Polar	6.24	5.68	-0.56	146	105	-41	143.8	89	-54.8	68	-2.7	B	S	P	P	L	L	334.582	333.279	335.572	loop	interface	interface	0.648889	4	0	0	0	1.57	0.0317168	0.202712	0	0	0.892066	0	-0.914177	1.54244	-0.0326645	-0.0920525	-1.17051	-0.0223958	-0.18333	0	0	0
E	96	A	negativeCharge	Hydrophobic	3.22	6	2.78	147	89	-58	138.4	88.6	-49.8	107	-5.3	B	S	-	N	L	B	337.449	337.544	339.842	loop	surface	surface.external	0.399103	0	0	0	0	11.18	0.185906	0.772866	0.0373631	0.212489	3.1527	4.04799	-6.1193	3.1522	-0.680593	-3.44578	1.34352	-0.350102	-0.810849	0	-0.577623	-3.55e-15
E	96	C	negativeCharge	Special	3.22	5.07	1.85	147	121	-26	138.4	108.5	-29.9	170	-6	B	S	-	P	L	C	337.449	337.544	339.842	loop	surface	surface.external	0.399103	0	0	0	0	8.56	0.836065	4.15839	0.0933705	0.121324	1.68812	3.46858	-4.17741	2.0472	-0.771199	-1.08201	3.50429	-0.188503	-0.577476	0	-0.545376	-3.55e-15
E	96	F	negativeCharge	Hydrophobic	3.22	3.32	0.1	147	165	18	138.4	189.9	51.5	140	-6.3	B	B	-	N	L	B	337.449	337.544	339.842	loop	surface	surface.external	0.399103	0	0	0	0	78.86	-0.334498	-0.0077978	1.39534	0.751469	-0.696575	3.31643	-0.735595	-1.89361	-2.12623	0.120682	1.73673	-1.32299	0.509629	8.34e-08	-0.553442	8.3e-08
E	96	G	negativeCharge	Special	3.22	3.29	0.07	147	75	-72	138.4	60.1	-78.3	98	-3.1	B	S	-	N	L	B	337.449	337.544	339.842	loop	surface	surface.external	0.399103	0	0	0	0	9.79	-0.187668	-0.965757	0.252819	0.181107	5.33715	3.75897	-9.23824	5.79703	-2.34343	-3.29073	0.838847	-1.69233	-1.58222	0	-0.566969	-3.55e-15
E	96	H	negativeCharge	PositiveCharge	3.22	7.59	4.37	147	155	8	138.4	153.2	14.8	40	-0.3	B	B	-	+	L	L	337.449	337.544	339.842	loop	surface	surface.external	0.399103	0	0	0	0	12.16	0.2538	1.65327	0.0793293	0.0492798	-0.192867	3.22517	-0.0763309	0.116731	-0.351949	-0.687022	-0.110498	-0.103544	0.190493	0	-0.538943	0.243912
E	96	I	negativeCharge	Hydrophobic	3.22	6.02	2.8	147	131	-16	138.4	166.7	28.3	134	-8	B	B	-	N	L	B	337.449	337.544	339.842	loop	surface	surface.external	0.399103	0	0	0	0	70.05	2.20226	11.2102	-0.0725431	0.154843	-1.54493	4.22907	-0.655377	-3.66501	7.19615	-0.311501	4.0692	2.45192	0.775865	0	-0.641611	-3.55e-15
E	96	L	negativeCharge	Hydrophobic	3.22	9.71	6.49	147	131	-16	138.4	166.7	28.3	138	-7.3	B	B	-	N	L	B	337.449	337.544	339.842	loop	surface	surface.external	0.399103	0	0	0	0	38.13	-0.147808	-0.0619853	-0.0553993	-0.187608	-1.52553	3.41978	0.11316	-3.08039	0.173404	-0.239825	1.84029	0.0371764	0.31195	0	-0.557048	-3.55e-15
E	96	M	negativeCharge	Hydrophobic	3.22	5.74	2.52	147	149	2	138.4	162.9	24.5	126	-5.4	B	B	-	N	L	B	337.449	337.544	339.842	loop	surface	surface.external	0.399103	0	0	0	0	12.79	0.150157	1.09304	-0.0117566	-0.231206	-2.59315	3.52501	0.252421	-3.9484	0.073075	0.475985	4.07803	0.0470972	0.661843	0	-0.574055	-3.55e-15
E	96	N	negativeCharge	Polar	3.22	5.47	2.25	147	132	-15	138.4	114.1	-24.3	42	0	B	S	-	P	L	L	337.449	337.544	339.842	loop	surface	surface.external	0.399103	0	0	0	0	9.41	0.67767	3.60412	0.0843362	0.137683	0.996592	3.54897	-1.6089	1.62109	-0.62967	-1.25022	-0.0752932	1.34424	-0.176602	0	-0.564717	-3.55e-15
E	96	P	negativeCharge	Special	3.22	6.3	3.08	147	115	-32	138.4	112.7	-25.7	93	-1.9	B	P	-	N	L	P	337.449	337.544	339.842	loop	surface	surface.external	0.399103	0	0	0	0	10.14	2.50104	12.4603	2.81437	2.68916	0.622294	3.36556	-4.9392	-1.24081	10.5119	-1.55347	2.43322	-1.70523	-5.67968	0	-0.537489	-3.55e-15
E	96	Q	negativeCharge	Polar	3.22	6.24	3.02	147	146	-1	138.4	143.8	5.4	29	0	B	B	-	P	L	L	337.449	337.544	339.842	loop	surface	surface.external	0.399103	0	0	0	0	9.32	0.657489	2.80724	-1.88146	-1.87961	-0.307905	3.3501	-0.803938	-0.331563	-0.0725427	1.52162	3.66052	0.0909504	0.420807	0	-0.538943	-3.55e-15
E	96	R	negativeCharge	PositiveCharge	3.22	6.34	3.12	147	174	27	138.4	173.4	35	54	1	B	B	-	+	L	L	337.449	337.544	339.842	loop	surface	surface.external	0.399103	0	0	0	0	4.29	0.792821	4.42356	-2.51271	-3.9041	-0.946675	5.38897	-0.592013	-0.788057	-0.224113	3.02517	5.8181	0.354575	0.329695	0	-1.19559	-7.11e-15
E	96	S	negativeCharge	Polar	3.22	5.68	2.46	147	105	-42	138.4	89	-49.4	80	-2.7	B	S	-	P	L	L	337.449	337.544	339.842	loop	surface	surface.external	0.399103	0	0	0	0	9.56	1.28651	6.44065	-2.34133	-2.67099	2.42697	3.55758	-2.77827	4.51331	-2.55021	-0.220099	7.33254	-0.309281	-0.220101	8.34e-08	-0.519574	8.3e-08
E	96	T	negativeCharge	Polar	3.22	5.6	2.38	147	119	-28	138.4	116.1	-22.3	65	-2.8	B	S	-	P	L	L	337.449	337.544	339.842	loop	surface	surface.external	0.399103	0	0	0	0	11.89	1.26428	7.76498	-1.75787	-1.66074	0.870376	3.57862	-1.73298	1.32457	0.613872	-0.799682	6.38808	1.50759	-0.23518	0	-0.566862	-3.55e-15
E	96	V	negativeCharge	Hydrophobic	3.22	5.61	2.39	147	117	-30	138.4	140	1.6	121	-7.7	B	S	-	N	L	B	337.449	337.544	339.842	loop	surface	surface.external	0.399103	0	0	0	0	74.2	1.98636	9.92113	-0.0463728	0.021352	-0.696033	3.23971	-0.520946	-1.78701	2.55121	-0.809856	3.96374	4.54218	0.625922	0	-0.536852	-3.55e-15
E	96	Y	negativeCharge	Hydrophobic	3.22	5.66	2.44	147	181	34	138.4	193.6	55.2	122	-2.2	B	B	-	N	L	B	337.449	337.544	339.842	loop	surface	surface.external	0.399103	0	0	0	0	26.57	0.0382995	1.8112	1.45667	0.761512	-0.159637	3.76651	-1.57758	-1.25635	-1.89862	-0.3818	1.7846	-0.113107	0.305217	8.34e-08	-0.570994	8.3e-08
C	97	A	Special	Hydrophobic	5.07	6	0.93	121	89	-32	108.5	88.6	-19.9	195	0.7	S	S	P	N	C	B	340.225	339.838	340.523	loop	core	core	0	0	0	0	0	1.33	0.364898	2.05887	0.838794	1.13961	4.19574	0.23872	-3.15258	4.27693	-0.57108	-4.46106	-0.374169	-0.0643748	-0.71242	0	0	-0.00765646
C	97	D	Special	negativeCharge	5.07	5.05	-0.02	121	133	12	108.5	111.1	2.6	154	6	S	S	P	-	C	L	340.225	339.838	340.523	loop	core	core	0	0	0	0	0	-8.4	-0.661661	-2.96728	-3.29542	-11.0865	-0.457708	-0.980141	13.3234	1.60747	2.04664	-1.77814	-2.82413	-0.0542377	-0.751146	-8.34e-08	0.480937	0.0506357
C	97	E	Special	negativeCharge	5.07	3.22	-1.85	121	147	26	108.5	138.4	29.9	170	6	S	B	P	-	C	L	340.225	339.838	340.523	loop	core	core	0	0	0	0	0	-6.66	2.06528	13.4452	0.696431	-3.52601	-3.97367	-4.95312	19.4589	-3.968	7.96467	2.33696	-2.91306	0.705506	-0.621167	8.34e-08	0.420954	1.19571
C	97	G	Special	Special	5.07	3.29	-1.78	121	75	-46	108.5	60.1	-48.4	159	2.9	S	S	P	N	C	B	340.225	339.838	340.523	loop	core	core	0	0	0	0	0	0.96	0.518482	2.00302	1.10723	1.1843	7.4299	0.320035	-7.4727	8.65028	-1.56407	-4.46582	-3.05105	-0.127439	-1.53194	0	0	-0.00765646
C	97	H	Special	PositiveCharge	5.07	7.59	2.52	121	155	34	108.5	153.2	44.7	174	5.7	S	B	P	+	C	L	340.225	339.838	340.523	loop	core	core	0	0	0	0	0	1.62	15.9124	61.5804	-0.108984	-2.57575	-5.94846	0.196763	16.594	-5.57288	59.55	-0.241273	-1.2082	-0.019339	-0.674161	0	-1.42e-14	0.914494
C	97	L	Special	Hydrophobic	5.07	9.71	4.64	121	131	10	108.5	166.7	58.2	198	-1.3	S	B	P	N	C	B	340.225	339.838	340.523	loop	core	core	0	0	0	0	0	23.75	-1.06703	-5.19238	0.26315	0.778577	-5.82581	0.077876	6.90075	-12.2475	7.84269	0.464087	-3.51848	-0.02018	-0.680405	0	0	0.0924818
C	97	P	Special	Special	5.07	6.3	1.23	121	115	-6	108.5	112.7	4.2	169	4.1	S	P	P	N	C	P	340.225	339.838	340.523	loop	core	core	0	0	0	0	0	2.45	5.41129	30.9159	8.02213	5.37901	0.396002	0.0957032	0.477876	-2.69945	24.0666	-3.15672	-1.64258	-0.0454781	-5.36848	8.34e-08	2.2e-09	0.0227644
C	97	Q	Special	Polar	5.07	6.24	1.17	121	146	25	108.5	143.8	35.3	154	6	S	B	P	P	C	L	340.225	339.838	340.523	loop	core	core	0	0	0	0	0	1.75	-0.790456	5.51599	-2.00671	-4.35029	-5.08784	0.0848846	11.057	-4.72991	8.77166	4.13094	-2.8473	0.400412	-0.785054	8.34e-08	2.2e-09	0.0931863
C	97	S	Special	Polar	5.07	5.68	0.61	121	105	-16	108.5	89	-19.5	112	3.3	S	S	P	P	C	L	340.225	339.838	340.523	loop	core	core	0	0	0	0	0	-0.64	0.155566	1.45937	-0.976541	-1.62828	3.00623	0.226373	1.13186	5.93299	-0.603041	-1.79854	-3.83617	0.000969501	-0.69111	0	0	0.00352311
C	97	T	Special	Polar	5.07	5.6	0.53	121	119	-2	108.5	116.1	7.6	149	3.2	S	S	P	P	C	L	340.225	339.838	340.523	loop	core	core	0	0	0	0	0	4.98	-0.0871725	0.522347	-1.47471	-1.14449	-0.840903	-0.0240335	5.84274	-0.735005	1.11435	-1.80388	-0.785293	0.363778	-0.0303001	0	0	0.00979216
A	98	C	Hydrophobic	Special	6	5.07	-0.93	89	121	32	88.6	108.5	19.9	195	-0.7	S	S	N	P	B	C	342.071	341.945	343.549	loop	interface	interface	0.0155039	1	0	0	0	-14.22	1.03102	7.51834	-0.265382	-2.58803	-3.05795	0.00322574	2.19299	-2.93531	5.17549	4.82385	0.0354021	4.13405	-0.0601182	-8.34e-08	-2.2e-09	-8.3e-08
A	98	G	Hydrophobic	Special	6	3.29	-2.71	89	75	-14	88.6	60.1	-28.5	60	2.2	S	S	N	N	B	B	342.071	341.945	343.549	loop	interface	interface	0.0155039	1	0	0	0	-3.73	-0.990684	-5.44934	0.924304	1.46027	3.00946	-0.00615481	-3.06679	4.68996	-6.92874	-0.389896	-5.09756	-0.0441961	-0.995563	8.34e-08	5.15e-09	8.3e-08
A	98	H	Hydrophobic	PositiveCharge	6	7.59	1.59	89	155	66	88.6	153.2	64.6	86	5	S	B	N	+	B	L	342.071	341.945	343.549	loop	interface	interface	0.0155039	1	0	0	0	-11.1	16.2645	86.7308	-0.604997	-4.34479	-7.7834	-0.0354597	16.8746	-7.4777	83.8666	4.27383	0.0667728	1.08234	0.355607	0	1.92e-13	0.813042
A	98	I	Hydrophobic	Hydrophobic	6	6.02	0.02	89	131	42	88.6	166.7	78.1	94	-2.7	S	B	N	N	B	B	342.071	341.945	343.549	loop	interface	interface	0.0155039	1	0	0	0	65.92	3.98344	25.05	-0.485082	-0.227467	-7.40055	-0.0260814	8.64293	-13.5942	29.1201	5.03307	0.141634	3.8456	0.223461	0	0	0
A	98	L	Hydrophobic	Hydrophobic	6	9.71	3.71	89	131	42	88.6	166.7	78.1	96	-2	S	B	N	N	B	B	342.071	341.945	343.549	loop	interface	interface	0.0155039	1	0	0	0	33.47	5.38838	23.5794	-0.556568	-0.262661	-7.81462	-0.0690852	6.82993	-14.7074	34.6585	4.92025	0.128113	0.452979	0.466649	0	0	0
A	98	Q	Hydrophobic	Polar	6	6.24	0.24	89	146	57	88.6	143.8	55.2	91	5.3	S	B	N	P	B	L	342.071	341.945	343.549	loop	interface	interface	0.0155039	1	0	0	0	-4.26	3.532	24.1234	-0.655876	-3.09696	-7.78671	-0.1732	14.2226	-7.52786	18.5231	8.86641	0.0537685	1.69815	0.300879	-8.34e-08	-1.93e-09	-8.3e-08
A	98	S	Hydrophobic	Polar	6	5.68	-0.32	89	105	16	88.6	89	0.4	99	2.6	S	S	N	P	B	L	342.071	341.945	343.549	loop	interface	interface	0.0155039	1	0	0	0	-3.71	-0.506521	3.31002	0.971766	-3.38716	-1.15311	-0.012422	5.73706	2.06282	-2.5456	2.33427	-2.58687	1.88925	-0.0523947	8.34e-08	2.19e-09	8.3e-08
A	98	T	Hydrophobic	Polar	6	5.6	-0.4	89	119	30	88.6	116.1	27.5	58	2.5	S	S	N	P	B	L	342.071	341.945	343.549	loop	interface	interface	0.0155039	1	0	0	0	0.46	0.970293	5.16088	-0.431529	-6.52601	-3.91968	-0.0189843	7.10304	-4.12211	9.13942	2.85887	0.0515618	1.0263	0.123994	-8.34e-08	-2.46e-09	-8.3e-08
A	98	V	Hydrophobic	Hydrophobic	6	5.61	-0.39	89	117	28	88.6	140	51.4	64	-2.4	S	S	N	N	B	B	342.071	341.945	343.549	loop	interface	interface	0.0155039	1	0	0	0	68.87	0.225914	5.09185	-0.363043	-0.23545	-5.37417	-0.0239752	5.68103	-9.78371	10.1016	2.26571	0.0854281	2.73846	0.115955	0	0	0
N	99	A	Polar	Hydrophobic	5.47	6	0.53	132	89	-43	114.1	88.6	-25.5	111	-5.3	S	S	P	N	L	B	342.448	342.735	343.253	loop	interface	interface	0.0512821	4	0	0	0	157.88	0.315701	2.75181	6.82237	6.74086	6.27215	0.412326	-10.0508	4.72977	-2.10707	-4.07834	-5.94646	-0.0430095	-0.842884	0	0	0
N	99	C	Polar	Special	5.47	5.07	-0.4	132	121	-11	114.1	108.5	-5.6	139	-6	S	S	P	P	L	C	342.448	342.735	343.253	loop	interface	interface	0.0512821	4	0	0	0	41.33	0.93676	4.03273	6.57465	6.48767	2.93848	0.337109	-8.09994	0.934401	-1.63529	0.35426	-3.83379	-0.0248259	-0.626982	0	0	0
N	99	D	Polar	negativeCharge	5.47	5.05	-0.42	132	133	1	114.1	111.1	-3	23	0	S	S	P	-	L	L	342.448	342.735	343.253	loop	interface	interface	0.0512821	4	0	0	0	-129.94	1.59775	6.58916	0.661447	0.637688	1.09338	1.31723	6.46185	0.904855	-1.73662	-1.09147	-3.3595	-0.00404077	-0.12827	0	1.70435	0
N	99	E	Polar	negativeCharge	5.47	3.22	-2.25	132	147	15	114.1	138.4	24.3	42	0	S	B	P	-	L	L	342.448	342.735	343.253	loop	interface	interface	0.0512821	4	0	0	0	-128.8	3.87863	16.4615	6.75477	5.30604	-0.753925	1.55994	6.70852	-2.8827	-0.833399	2.30259	-3.53232	0.0800737	-0.463244	0	1.75194	0
N	99	F	Polar	Hydrophobic	5.47	3.32	-2.15	132	165	33	114.1	189.9	75.8	158	-6.3	S	B	P	N	L	B	342.448	342.735	343.253	loop	interface	interface	0.0512821	4	0	0	0	346.7	0.857594	7.43941	6.52843	7.44902	-5.39318	0.0182153	0.368002	-12.3282	12.3932	0.658752	-1.97849	-0.285041	0.379958	8.34e-08	0.00351634	0.00527455
N	99	G	Polar	Special	5.47	3.29	-2.18	132	75	-57	114.1	60.1	-54	80	-3.1	S	S	P	N	L	B	342.448	342.735	343.253	loop	interface	interface	0.0512821	4	0	0	0	16.81	0.192632	2.04463	6.98906	6.83442	9.61781	0.589015	-12.7849	10.4738	-3.72789	-4.37931	-11.5118	-0.0556108	-1.16478	0	0	0
N	99	L	Polar	Hydrophobic	5.47	9.71	4.24	132	131	-1	114.1	166.7	52.6	153	-7.3	S	B	P	N	L	B	342.448	342.735	343.253	loop	interface	interface	0.0512821	4	0	0	0	314.82	-0.447294	-0.84514	6.52086	5.88467	-2.81377	-0.191525	-2.48646	-10.6945	4.75105	2.1009	-5.54876	1.6369	-0.262949	-8.34e-08	-0.00446715	-8.3e-08
N	99	M	Polar	Hydrophobic	5.47	5.74	0.27	132	149	17	114.1	162.9	48.8	142	-5.4	S	B	P	N	L	B	342.448	342.735	343.253	loop	interface	interface	0.0512821	4	0	0	0	193.12	-0.660155	-4.48797	6.53587	6.69672	-4.48811	-0.382874	-0.946629	-11.4079	-0.396263	3.50569	-3.61676	0.0123174	0.0758357	0	0	0
N	99	P	Polar	Special	5.47	6.3	0.83	132	115	-17	114.1	112.7	-1.4	91	-1.9	S	P	P	N	L	P	342.448	342.735	343.253	loop	interface	interface	0.0512821	4	0	0	0	-7.67	1.43213	13.7996	6.7079	6.74037	3.85239	0.388087	-11.8046	-0.572491	22.2967	-2.36262	-11.4054	-0.0407078	-0.859126	0	0	0
N	99	R	Polar	PositiveCharge	5.47	6.34	0.87	132	174	42	114.1	173.4	59.3	86	1	S	B	P	+	L	L	342.448	342.735	343.253	loop	interface	interface	0.0512821	4	0	0	0	-78.53	-0.170579	-0.591203	2.67097	1.12571	-5.7496	-5.81393	8.92335	-6.30673	0.427686	6.80798	-1.30772	0.47245	-0.0626407	-8.34e-08	-1.84138	-8.3e-08
N	99	S	Polar	Polar	5.47	5.68	0.21	132	105	-27	114.1	89	-25.1	46	-2.7	S	S	P	P	L	L	342.448	342.735	343.253	loop	interface	interface	0.0512821	4	0	0	0	27.21	0.628408	4.04779	4.4966	4.43737	4.95306	0.330899	-5.23842	6.55105	-1.84361	-1.33891	-8.26981	-0.0304406	-0.647566	0	0	0
N	99	T	Polar	Polar	5.47	5.6	0.13	132	119	-13	114.1	116.1	2	65	-2.8	S	S	P	P	L	L	342.448	342.735	343.253	loop	interface	interface	0.0512821	4	0	0	0	125.89	2.91609	14.1822	6.82237	6.67612	2.42105	0.349569	-1.43519	1.03106	3.1341	-0.966658	-3.82904	-0.0212062	-0.400518	0	0	0
V	100	A	Hydrophobic	Hydrophobic	5.61	6	0.39	117	89	-28	140	88.6	-51.4	64	2.4	S	S	N	N	B	B	344.254	344.104	345.461	loop	interface	interface	0.0689655	2	0	0	0	-238.95	2.09993	10.8329	0.588439	1.01469	4.81042	0.205037	-2.41618	8.61339	-1.90426	-3.05375	3.36424	-0.388781	-0.121049	8.34e-08	2.19e-09	-0.000338089
V	100	C	Hydrophobic	Special	5.61	5.07	-0.54	117	121	4	140	108.5	-31.5	192	1.7	S	S	N	P	B	C	344.254	344.104	345.461	loop	interface	interface	0.0689655	2	0	0	0	-262.67	1.27678	7.39578	0.064968	0.236696	2.25903	0.293757	-2.5371	5.15791	-0.470892	0.700651	2.128	-0.437245	0.00385344	0	0	0
V	100	F	Hydrophobic	Hydrophobic	5.61	3.32	-2.29	117	165	48	140	189.9	49.9	50	1.4	S	B	N	N	B	B	344.254	344.104	345.461	loop	interface	interface	0.0689655	2	0	0	0	7.79	0.906367	12.6642	0.035113	-0.322525	-6.60985	0.639147	4.50177	-8.53084	17.96	2.46571	2.17483	0.308093	-0.0926307	0	0	0.0427514
V	100	G	Hydrophobic	Special	5.61	3.29	-2.32	117	75	-42	140	60.1	-79.9	109	4.6	S	S	N	N	B	B	344.254	344.104	345.461	loop	interface	interface	0.0689655	2	0	0	0	-265.62	3.4484	18.9227	0.850027	0.305434	7.41605	0.415366	-5.20833	12.6441	-0.694743	-3.35701	6.9881	-0.436266	-0.312416	0	0	0
V	100	I	Hydrophobic	Hydrophobic	5.61	6.02	0.41	117	131	14	140	166.7	26.7	29	-0.3	S	B	N	N	B	B	344.254	344.104	345.461	loop	interface	interface	0.0689655	2	0	0	0	-7.76	-0.607161	-1.86611	-0.0658134	0.0476865	-2.17964	-0.162921	0.992435	-4.2242	0.157906	2.93533	0.342	0.291095	-0.00662462	0	0	0
V	100	L	Hydrophobic	Hydrophobic	5.61	9.71	4.1	117	131	14	140	166.7	26.7	32	0.4	S	B	N	N	B	B	344.254	344.104	345.461	loop	interface	interface	0.0689655	2	0	0	0	-102.3	-0.580116	-2.70406	0.149355	1.04237	-2.35253	0.194739	-0.0509974	-5.97012	-0.537545	2.83609	1.59937	0.384028	-0.169684	8.34e-08	2.19e-09	0.00117957
V	100	P	Hydrophobic	Special	5.61	6.3	0.69	117	115	-2	140	112.7	-27.3	68	5.8	S	P	N	N	B	P	344.254	344.104	345.461	loop	interface	interface	0.0689655	2	0	0	0	-267.77	3.63074	18.6457	2.71513	2.27518	1.57684	-0.549928	-1.63573	3.28434	7.42039	-1.1574	5.12836	-0.411515	0.652388	0	0	0
V	100	R	Hydrophobic	PositiveCharge	5.61	6.34	0.73	117	174	57	140	173.4	33.4	96	8.7	S	B	N	+	B	L	344.254	344.104	345.461	loop	interface	interface	0.0689655	2	0	0	0	-273.48	1.50496	7.91081	0.185096	1.06603	-2.98624	1.28728	5.81058	-0.319167	-1.53833	3.49257	1.33786	0.00558852	0.374603	8.34e-08	-0.430807	0.000363728
V	100	S	Hydrophobic	Polar	5.61	5.68	0.07	117	105	-12	140	89	-51	124	5	S	S	N	P	B	L	344.254	344.104	345.461	loop	interface	interface	0.0689655	2	0	0	0	-263.51	2.36881	12.7509	-0.384115	-0.00396913	3.73118	0.105999	0.265272	9.5969	-1.36594	-0.29864	1.47278	-0.367246	-0.188625	8.34e-08	2.19e-09	-0.00136249
V	100	T	Hydrophobic	Polar	5.61	5.6	-0.01	117	119	2	140	116.1	-23.9	69	4.9	S	S	N	P	B	L	344.254	344.104	345.461	loop	interface	interface	0.0689655	2	0	0	0	-246.67	0.75812	4.93479	-0.977053	-0.899913	1.7169	0.190026	0.825424	4.68897	-0.319132	0.144239	0	-0.434664	-0.0503136	0	0	0
V	100	Y	Hydrophobic	Hydrophobic	5.61	5.66	0.05	117	181	64	140	193.6	53.6	55	5.5	S	B	N	N	B	B	344.254	344.104	345.461	loop	interface	interface	0.0689655	2	0	0	0	-152.53	3.55276	19.108	0.0490059	-0.336363	-7.94466	0.64675	9.02461	-8.3954	20.6044	3.06543	2.32312	0.0179873	-0.0953521	0	0	0.0531447
V	101	A	Hydrophobic	Hydrophobic	5.61	6	0.39	117	89	-28	140	88.6	-51.4	64	2.4	S	S	N	N	B	B	347.849	348.442	350.35	strand	interface	interface	0	3	0	0	0	-255.21	1.6975	8.27097	0.501054	0.177773	5.69262	0	-4.51099	9.73994	-1.56424	-2.13571	1.47335	-1.10283	-2.51985	0	0	0
V	101	C	Hydrophobic	Special	5.61	5.07	-0.54	117	121	4	140	108.5	-31.5	192	1.7	S	S	N	P	B	C	347.849	348.442	350.35	strand	interface	interface	0	3	0	0	0	-280.21	1.35032	6.78438	-0.444241	-0.659948	2.36816	0	-1.80676	6.69015	-1.49421	2.36423	0.868759	-1.10175	-1.16417	0	0	0
V	101	D	Hydrophobic	negativeCharge	5.61	5.05	-0.56	117	133	16	140	111.1	-28.9	152	7.7	S	S	N	-	B	L	347.849	348.442	350.35	strand	interface	interface	0	3	0	0	0	-288.59	4.33971	20.5538	-0.87486	-0.152669	1.37511	-2.86092	16.9709	6.92329	-2.98151	0.244326	1.18521	-1.27037	-0.217677	8.34e-08	-0.137072	2.1324
V	101	E	Hydrophobic	negativeCharge	5.61	3.22	-2.39	117	147	30	140	138.4	-1.6	121	7.7	S	B	N	-	B	L	347.849	348.442	350.35	strand	interface	interface	0	3	0	0	0	-288.59	4.02108	15.6342	-4.10783	-3.01891	-1.95397	-4.60644	19.7554	2.40052	-0.466485	4.68633	1.64966	-0.905555	0.537939	8.34e-08	-0.0195162	2.22103
V	101	F	Hydrophobic	Hydrophobic	5.61	3.32	-2.29	117	165	48	140	189.9	49.9	50	1.4	S	B	N	N	B	B	347.849	348.442	350.35	strand	interface	interface	0	3	0	0	0	9.95	8.9291	50.0062	1.1141	2.27793	-6.76827	1.69e-06	8.78403	-7.67161	46.191	1.36484	4.01936	0.621659	4.13505	8.34e-08	2.19e-09	0.0732003
V	101	G	Hydrophobic	Special	5.61	3.29	-2.32	117	75	-42	140	60.1	-79.9	109	4.6	S	S	N	N	B	B	347.849	348.442	350.35	strand	interface	interface	0	3	0	0	0	-283.99	3.32504	16.4246	1.28765	0.380546	9.17208	0	-7.46977	15.5243	-1.63699	-2.11246	2.43261	-1.15333	-3.5579	0	0	0
V	101	I	Hydrophobic	Hydrophobic	5.61	6.02	0.41	117	131	14	140	166.7	26.7	29	-0.3	S	B	N	N	B	B	347.849	348.442	350.35	strand	interface	interface	0	3	0	0	0	-8.11	-0.471666	-2.82741	-0.293036	-0.0171638	-2.8077	0	2.11704	-5.02399	-0.835647	2.66954	0.783032	0.580505	0.839722	0	0	0
V	101	K	Hydrophobic	PositiveCharge	5.61	9.74	4.13	117	146	29	140	168.6	28.6	97	8.1	S	B	N	+	B	L	347.849	348.442	350.35	strand	interface	interface	0	3	0	0	0	-287.39	4.77853	21.6384	-8.68086	-7.81934	-4.3792	-0.864216	17.5961	-2.16392	18.1541	7.32219	3.81813	-1.05301	0.919963	0	-0.406827	0.115279
V	101	L	Hydrophobic	Hydrophobic	5.61	9.71	4.1	117	131	14	140	166.7	26.7	32	0.4	S	B	N	N	B	B	347.849	348.442	350.35	strand	interface	interface	0	3	0	0	0	-106.47	1.68582	7.71962	-0.388171	-0.77174	-3.02425	-1.69e-06	2.39017	-5.35849	12.3044	2.89762	0.59372	-0.989006	1.21213	-8.34e-08	-2.19e-09	0.0654023
V	101	P	Hydrophobic	Special	5.61	6.3	0.69	117	115	-2	140	112.7	-27.3	68	5.8	S	P	N	N	B	P	347.849	348.442	350.35	strand	interface	interface	0	3	0	0	0	-287.27	7.46944	33.52	8.15243	2.39058	3.08489	1.69e-06	-2.66752	4.26578	18.6575	-1.06645	1.85515	-1.15166	-2.34761	8.34e-08	2.19e-09	-0.000708923
V	101	R	Hydrophobic	PositiveCharge	5.61	6.34	0.73	117	174	57	140	173.4	33.4	96	8.7	S	B	N	+	B	L	347.849	348.442	350.35	strand	interface	interface	0	3	0	0	0	-287.38	7.85929	43.1102	-3.55668	-2.9281	-8.13774	-1.90814	20.979	-0.576778	28.1632	7.0537	4.5623	0.138052	2.65693	0	-0.860609	0.182002
V	101	S	Hydrophobic	Polar	5.61	5.68	0.07	117	105	-12	140	89	-51	124	5	S	S	N	P	B	L	347.849	348.442	350.35	strand	interface	interface	0	3	0	0	0	-282.69	2.31069	11.594	-1.34326	-1.70536	4.5662	0	0.725527	12.2525	-1.49285	0.51256	-0.799198	-1.12215	-2.25043	0	0	0
V	101	T	Hydrophobic	Polar	5.61	5.6	-0.01	117	119	2	140	116.1	-23.9	69	4.9	S	S	N	P	B	L	347.849	348.442	350.35	strand	interface	interface	0	3	0	0	0	-264.07	0.741202	3.79582	-1.48958	-1.61609	1.70585	0	3.12849	6.1478	-1.48671	0.469761	-1.97372	-1.08998	-0.588787	0	0	0
V	101	W	Hydrophobic	Hydrophobic	5.61	5.89	0.28	117	204	87	140	227.8	87.8	88	5.1	S	B	N	N	B	B	347.849	348.442	350.35	strand	interface	interface	0	3	0	0	0	-42.19	11.0227	54.5546	-2.06702	-0.705688	-11.2514	1.69e-06	16.0528	-11.9388	50.2783	1.78551	6.00936	6.21696	5.51618	8.34e-08	2.19e-09	0.174511
V	102	A	Hydrophobic	Hydrophobic	5.61	6	0.39	117	89	-28	140	88.6	-51.4	64	2.4	S	S	N	N	B	B	348.779	348.699	350.611	strand	interface	interface	0.0574713	1	0	0	0	-256.44	2.40706	12.0842	0.435518	0.863795	5.13565	-0.0140349	-2.50123	9.33552	-1.62775	-2.97717	3.71855	-0.263787	-1.78896	8.34e-08	-0.0208307	8.3e-08
V	102	C	Hydrophobic	Special	5.61	5.07	-0.54	117	121	4	140	108.5	-31.5	192	1.7	S	S	N	P	B	C	348.779	348.699	350.611	strand	interface	interface	0.0574713	1	0	0	0	-281.43	1.94823	10.0551	0.331463	0.863131	2.03784	-0.00471877	-1.27142	5.79678	-1.27177	1.5625	2.29069	-0.250565	-1.1315	8.34e-08	-0.0288045	8.3e-08
V	102	D	Hydrophobic	negativeCharge	5.61	5.05	-0.56	117	133	16	140	111.1	-28.9	152	7.7	S	S	N	-	B	L	348.779	348.699	350.611	strand	interface	interface	0.0574713	1	0	0	0	-288.59	3.92699	19.5713	0.112374	0	1.22706	-0.848395	12.1808	6.47643	0.181948	-0.269773	0.962999	-0.258753	-0.490994	0	-0.193349	0
V	102	F	Hydrophobic	Hydrophobic	5.61	3.32	-2.29	117	165	48	140	189.9	49.9	50	1.4	S	B	N	N	B	B	348.779	348.699	350.611	strand	interface	interface	0.0574713	1	0	0	0	10.52	12.0644	31.7418	-0.177817	-0.321847	-3.14753	-0.918154	6.09586	-1.82527	19.4475	1.725	3.77437	7.0607	1.65345	8.34e-08	0.0290751	8.3e-08
V	102	G	Hydrophobic	Special	5.61	3.29	-2.32	117	75	-42	140	60.1	-79.9	109	4.6	S	S	N	N	B	B	348.779	348.699	350.611	strand	interface	interface	0.0574713	1	0	0	0	-285.41	3.67146	18.2436	0.920703	0.864943	8.65076	1.69e-06	-6.22332	14.807	-1.51158	-3.60703	4.64466	-0.302487	-4.01761	8.34e-08	2.19e-09	8.3e-08
V	102	I	Hydrophobic	Hydrophobic	5.61	6.02	0.41	117	131	14	140	166.7	26.7	29	-0.3	S	B	N	N	B	B	348.779	348.699	350.611	strand	interface	interface	0.0574713	1	0	0	0	-8.12	-0.30726	-1.0507	-0.193502	0.862628	-2.26368	0.0461675	1.68353	-4.18364	-0.476458	2.74111	0.202379	0.526874	0.740809	8.34e-08	0.00388816	8.3e-08
V	102	L	Hydrophobic	Hydrophobic	5.61	9.71	4.1	117	131	14	140	166.7	26.7	32	0.4	S	B	N	N	B	B	348.779	348.699	350.611	strand	interface	interface	0.0574713	1	0	0	0	-106.75	0.0691959	3.17145	0.206255	0.857642	-3.95519	0.177857	3.92695	-6.71143	2.91954	3.28607	2.66039	-0.187922	1.25716	8.34e-08	-0.00870301	8.3e-08
V	102	P	Hydrophobic	Special	5.61	6.3	0.69	117	115	-2	140	112.7	-27.3	68	5.8	S	P	N	N	B	P	348.779	348.699	350.611	strand	interface	interface	0.0574713	1	0	0	0	-288.59	5.74354	28.5272	6.21915	0.517058	2.35341	-0.320088	-2.88162	3.1565	13.0963	-1.08228	7.61624	-0.171022	-2.87068	8.34e-08	0.0235415	8.3e-08
V	102	R	Hydrophobic	PositiveCharge	5.61	6.34	0.73	117	174	57	140	173.4	33.4	96	8.7	S	B	N	+	B	L	348.779	348.699	350.611	strand	interface	interface	0.0574713	1	0	0	0	-286.65	1.25475	8.77386	-5.15493	-4.75448	-2.06894	-0.451298	7.68792	2.29048	-0.93955	6.62741	4.85721	0.933739	1.25979	8.34e-08	-0.253703	8.3e-08
V	102	S	Hydrophobic	Polar	5.61	5.68	0.07	117	105	-12	140	89	-51	124	5	S	S	N	P	B	L	348.779	348.699	350.611	strand	interface	interface	0.0574713	1	0	0	0	-283.99	3.55416	17.6341	0.418351	0.581332	4.3716	-0.299924	2.13935	11.6016	-1.62823	-0.511357	1.26442	-0.32731	-2.14024	8.34e-08	0.0242799	8.3e-08
V	102	T	Hydrophobic	Polar	5.61	5.6	-0.01	117	119	2	140	116.1	-23.9	69	4.9	S	S	N	P	B	L	348.779	348.699	350.611	strand	interface	interface	0.0574713	1	0	0	0	-265.36	2.11638	11.0151	0.299906	0.479053	1.83213	-0.343215	4.30517	6.23659	-1.61827	0.188053	-0.268897	-0.114298	-0.510569	8.34e-08	0.0189225	8.3e-08
V	102	W	Hydrophobic	Hydrophobic	5.61	5.89	0.28	117	204	87	140	227.8	87.8	88	5.1	S	B	N	N	B	B	348.779	348.699	350.611	strand	interface	interface	0.0574713	1	0	0	0	-42.07	15.5176	48.6726	-0.32098	0.863138	-3.57851	-0.0107657	9.78374	-0.209635	18.57	1.02287	6.42488	16.1385	3.84737	8.34e-08	-0.0106207	8.3e-08
V	102	Y	Hydrophobic	Hydrophobic	5.61	5.66	0.05	117	181	64	140	193.6	53.6	55	5.5	S	B	N	N	B	B	348.779	348.699	350.611	strand	interface	interface	0.0574713	1	0	0	0	-160.65	3.04989	37.0965	-0.448514	-2.52643	-4.49148	0.0137366	9.2552	-2.53502	17.9339	3.24657	4.50937	12.0972	2.66306	8.34e-08	0.0419746	8.3e-08
G	103	A	Special	Hydrophobic	3.29	6	2.71	75	89	14	60.1	88.6	28.5	60	-2.2	S	S	N	N	B	B	352.427	352.324	353.053	loop	core	core	0	0	0	0	0	260.34	3.04015	14.743	0.238191	0.864943	-3.59286	1.69e-06	3.02005	-6.41997	19.6394	-0.0464408	0.952358	0.0872607	1.80071	8.34e-08	2.19e-09	8.3e-08
G	103	E	Special	negativeCharge	3.29	3.22	-0.07	75	147	72	60.1	138.4	78.3	98	3.1	S	B	N	-	B	L	352.427	352.324	353.053	loop	core	core	0	0	0	0	0	-284.66	14.7557	65.3234	-1.04443	-0.948447	-10.4839	-3.73515	21.5069	-14.2418	61.8794	7.35451	3.54805	1.71329	3.28722	8.34e-08	-0.225028	8.3e-08
G	103	F	Special	Hydrophobic	3.29	3.32	0.03	75	165	90	60.1	189.9	129.8	153	-3.2	S	B	N	N	B	B	352.427	352.324	353.053	loop	core	core	0	0	0	0	0	321.85	21.8767	103.093	-3.16783	-2.12651	-15.7439	0.34318	10.1414	-25.6086	127.424	3.97437	5.13978	2.7189	4.24626	8.34e-08	2.19e-09	-0.000990563
G	103	H	Special	PositiveCharge	3.29	7.59	4.3	75	155	80	60.1	153.2	93.1	98	2.8	S	B	N	+	B	L	352.427	352.324	353.053	loop	core	core	0	0	0	0	0	-145.38	24.0067	124.272	-1.76179	-4.77757	-13.5046	2.25e-12	17.8231	-17.9593	134.757	4.58061	4.24802	0.0533379	3.50737	0	-1.14e-13	0.813042
G	103	P	Special	Special	3.29	6.3	3.01	75	115	40	60.1	112.7	52.6	42	1.2	S	P	N	N	B	P	352.427	352.324	353.053	loop	core	core	0	0	0	0	0	-288.59	10.4561	48.5039	6.61439	0.864943	-6.23406	1.69e-06	4.49263	-11.9921	47.7873	1.335	0.683762	4.95197	3.75133	8.34e-08	2.19e-09	8.3e-08
G	103	S	Special	Polar	3.29	5.68	2.39	75	105	30	60.1	89	28.9	56	0.4	S	S	N	P	B	L	352.427	352.324	353.053	loop	core	core	0	0	0	0	0	50.59	7.43564	36.5769	-0.244022	0.240937	-4.76487	1.69e-06	9.12009	-3.72463	28.6748	2.65258	1.30172	3.32019	2.13249	8.34e-08	2.19e-09	8.3e-08
G	103	T	Special	Polar	3.29	5.6	2.31	75	119	44	60.1	116.1	56	59	0.3	S	S	N	P	B	L	352.427	352.324	353.053	loop	core	core	0	0	0	0	0	237.28	13.2641	65.1689	-2.77888	-1.98972	-8.23437	1.69e-06	10.1272	-11.7275	68.6954	2.7138	4.38656	3.97646	3.77563	8.34e-08	2.19e-09	8.3e-08
Y	104	A	Hydrophobic	Hydrophobic	5.66	6	0.34	181	89	-92	193.6	88.6	-105	112	-3.1	B	S	N	N	B	B	354.52	356.491	359.406	loop	interface	interface	0.0190114	6	0	0	0	-178.09	4.30303	21.1574	3.16009	3.22398	12.5034	-0.268591	-8.35419	18.5434	-0.167438	-4.44562	-2.09367	-0.94388	-3.9639	0	0	0
Y	104	D	Hydrophobic	negativeCharge	5.66	5.05	-0.61	181	133	-48	193.6	111.1	-82.5	160	2.2	B	S	N	-	B	L	354.52	356.491	359.406	loop	interface	interface	0.0190114	6	0	0	0	-283.98	5.46893	27.3664	3.16969	3.25935	9.03323	-0.8887	2.87132	15.2261	-0.206867	-1.93962	-2.43744	-0.764655	-2.52535	0	0.0439882	-3.55e-15
Y	104	E	Hydrophobic	negativeCharge	5.66	3.22	-2.44	181	147	-34	193.6	138.4	-55.2	122	2.2	B	B	N	-	B	L	354.52	356.491	359.406	loop	interface	interface	0.0190114	6	0	0	0	-283.87	5.50603	27.5088	3.11802	3.21185	6.26406	-1.41289	5.15533	10.7466	-0.157651	0.416398	0.4428	-0.390848	-1.23546	0	0.115158	0
Y	104	F	Hydrophobic	Hydrophobic	5.66	3.32	-2.34	181	165	-16	193.6	189.9	-3.7	22	-4.1	B	B	N	N	B	B	354.52	356.491	359.406	loop	interface	interface	0.0190114	6	0	0	0	177.34	-0.530286	-1.76007	3.18525	3.29661	0.388078	-0.264513	-3.90914	-2.32568	-0.0202534	-0.332258	-1.36181	-0.416358	-0.854371	0	0	0
Y	104	G	Hydrophobic	Special	5.66	3.29	-2.37	181	75	-106	193.6	60.1	-133.5	147	-0.9	B	S	N	N	B	B	354.52	356.491	359.406	loop	interface	interface	0.0190114	6	0	0	0	-266	5.1107	25.5234	3.24124	3.32022	15.2382	-0.267122	-10.667	23.2203	-0.366866	-4.49687	-2.72022	-0.978572	-5.79141	0	0	0
Y	104	I	Hydrophobic	Hydrophobic	5.66	6.02	0.36	181	131	-50	193.6	166.7	-26.9	33	-5.8	B	B	N	N	B	B	354.52	356.491	359.406	loop	interface	interface	0.0190114	6	0	0	0	163.8	3.70006	19.895	3.1519	3.19634	3.80332	-0.450513	-2.35548	3.0924	7.11657	0.678238	0.864257	0.797929	0.985527	0	0	0
Y	104	K	Hydrophobic	PositiveCharge	5.66	9.74	4.08	181	146	-35	193.6	168.6	-25	85	2.6	B	B	N	+	B	L	354.52	356.491	359.406	loop	interface	interface	0.0190114	6	0	0	0	-233.98	4.54106	21.1713	1.40561	-3.05294	3.05359	0.188543	9.41883	5.03095	-0.0473589	5.22797	0.372736	-0.507246	-0.979786	0	0.0806492	0
Y	104	P	Hydrophobic	Special	5.66	6.3	0.64	181	115	-66	193.6	112.7	-80.9	110	0.3	B	P	N	N	B	P	354.52	356.491	359.406	loop	interface	interface	0.0190114	6	0	0	0	-279.45	1.28778	6.92046	3.2612	3.36603	9.2948	-0.270083	-10.2489	11.6203	-0.291407	-2.80448	-6.03432	-0.972702	-4.56239	0	0	0
Y	104	R	Hydrophobic	PositiveCharge	5.66	6.34	0.68	181	174	-7	193.6	173.4	-20.2	77	3.2	B	B	N	+	B	L	354.52	356.491	359.406	loop	interface	interface	0.0190114	6	0	0	0	-233.89	3.76496	19.1614	-1.88555	-1.27938	-0.163729	0.165509	10.046	6.40018	-0.0386004	4.9833	0.291541	0.980539	1.28674	0	-0.338411	0
Y	104	S	Hydrophobic	Polar	5.66	5.68	0.02	181	105	-76	193.6	89	-104.6	144	-0.5	B	S	N	P	B	L	354.52	356.491	359.406	loop	interface	interface	0.0190114	6	0	0	0	-260.86	5.3625	26.8125	3.29642	3.36691	11.95	-0.267225	-5.8063	19.9415	-0.330733	-2.87824	-1.57614	-0.883658	-3.77662	0	0	0
Y	104	T	Hydrophobic	Polar	5.66	5.6	-0.06	181	119	-62	193.6	116.1	-77.5	92	-0.6	B	S	N	P	B	L	354.52	356.491	359.406	loop	interface	interface	0.0190114	6	0	0	0	-203.98	7.11002	34.8663	3.14024	3.33692	9.16701	-0.261093	-1.68592	14.9802	6.18703	-1.82431	1.1585	0.667729	-2.21659	0	0	0
Y	104	V	Hydrophobic	Hydrophobic	5.66	5.61	-0.05	181	117	-64	193.6	140	-53.6	55	-5.5	B	S	N	N	B	B	354.52	356.491	359.406	loop	interface	interface	0.0190114	6	0	0	0	170.04	4.74385	24.3385	3.11935	3.11754	6.75324	-0.501998	-3.68771	8.68472	6.64689	-2.1295	1.90254	0.433428	-0.166124	0	0	0
Y	104	W	Hydrophobic	Hydrophobic	5.66	5.89	0.23	181	204	23	193.6	227.8	34.2	37	-0.4	B	B	N	N	B	B	354.52	356.491	359.406	loop	interface	interface	0.0190114	6	0	0	0	30.48	0.651665	3.54062	3.31087	3.38101	-3.78824	-0.262875	2.53881	-6.97375	3.72185	0.050103	1.46345	0.0993857	0.622359	0	0	0
G	105	A	Special	Hydrophobic	3.29	6	2.71	75	89	14	60.1	88.6	28.5	60	-2.2	S	S	N	N	B	B	351.384	351.193	352.363	loop	surface	surface.internal	0.471154	0	0	0	0	281.75	2.63273	13.1628	0.0423107	0	-1.86857	0	2.25825	-2.82827	8.713	0.0442241	6.70068	0.1012	2.10268	0	0	0
G	105	C	Special	Special	3.29	5.07	1.78	75	121	46	60.1	108.5	48.4	159	-2.9	S	S	N	P	B	C	351.384	351.193	352.363	loop	surface	surface.internal	0.471154	0	0	0	0	105.44	3.82941	19.0797	0.0423107	0	-2.10063	0	2.54201	-2.95101	9.1292	1.03045	11.3649	0.0223979	2.60694	0	0	0
G	105	D	Special	negativeCharge	3.29	5.05	1.76	75	133	58	60.1	111.1	51	94	3.1	S	S	N	-	B	L	351.384	351.193	352.363	loop	surface	surface.internal	0.471154	0	0	0	0	-211.76	4.14023	20.2365	0.0423107	0	-2.43357	0.986885	3.04287	-3.46099	9.24524	0.403985	11.5527	0.0230787	2.96094	0	0.834074	0
G	105	H	Special	PositiveCharge	3.29	7.59	4.3	75	155	80	60.1	153.2	93.1	98	2.8	S	B	N	+	B	L	351.384	351.193	352.363	loop	surface	surface.internal	0.471154	0	0	0	0	-86.52	3.83066	19.2899	0.0404023	0	-3.19169	-0.959206	4.19414	-4.182	9.21816	1.66317	12.0893	0.209419	4.0967	0	-0.853342	1.06151
G	105	I	Special	Hydrophobic	3.29	6.02	2.73	75	131	56	60.1	166.7	106.6	135	-4.9	S	B	N	N	B	B	351.384	351.193	352.363	loop	surface	surface.internal	0.471154	0	0	0	0	396.69	4.53674	23.5563	-0.263935	0	-6.84765	0	7.72556	-10.3626	10.6852	2.50089	13.5699	6.5489	7.05972	0	-3.55e-15	0
G	105	L	Special	Hydrophobic	3.29	9.71	6.42	75	131	56	60.1	166.7	106.6	138	-4.2	S	B	N	N	B	B	351.384	351.193	352.363	loop	surface	surface.internal	0.471154	0	0	0	0	385.37	3.56547	17.406	-0.296537	0	-6.6412	0	8.07081	-9.85443	9.76731	2.4701	13.5683	0.321716	6.87719	0	-3.55e-15	0
G	105	N	Special	Polar	3.29	5.47	2.18	75	132	57	60.1	114.1	54	80	3.1	S	S	N	P	B	L	351.384	351.193	352.363	loop	surface	surface.internal	0.471154	0	0	0	0	-68.51	3.75655	18.7069	0.0423107	0	-2.64633	0	3.23894	-3.76876	9.36012	0.807177	11.647	0.0264048	3.19042	0	0	0
G	105	P	Special	Special	3.29	6.3	3.01	75	115	40	60.1	112.7	52.6	42	1.2	S	P	N	N	B	P	351.384	351.193	352.363	loop	surface	surface.internal	0.471154	0	0	0	0	-274.68	8.96351	46.9215	5.3053	1.96544	-5.53424	-0.622932	2.94798	-10.1809	40.5678	1.54848	10.8619	0.0145907	-4.60345	0.00534298	0.0427984	8.3e-08
G	105	Q	Special	Polar	3.29	6.24	2.95	75	146	71	60.1	143.8	83.7	87	3.1	S	B	N	P	B	L	351.384	351.193	352.363	loop	surface	surface.internal	0.471154	0	0	0	0	-66.69	3.53191	17.2081	-2.73394	-3.3957	-3.5026	-1.68e-06	4.26683	-4.64766	10.9356	3.78568	12.0972	0.402735	4.38962	-8.34e-08	-2.18e-09	-8.3e-08
G	105	R	Special	PositiveCharge	3.29	6.34	3.05	75	174	99	60.1	173.4	113.3	125	4.1	S	B	N	+	B	L	351.384	351.193	352.363	loop	surface	surface.internal	0.471154	0	0	0	0	-189.62	3.36638	16.3078	0.0330001	0	-3.71253	-2.01626	4.24097	-5.28184	9.14141	2.92516	12.2402	0.420768	3.91652	0	-1.68307	0
G	105	S	Special	Polar	3.29	5.68	2.39	75	105	30	60.1	89	28.9	56	0.4	S	S	N	P	B	L	351.384	351.193	352.363	loop	surface	surface.internal	0.471154	0	0	0	0	38.39	3.81101	18.9212	-2.41782	-2.46013	-2.45748	0	3.53313	-2.29138	9.06994	2.73619	12.0429	1.16586	2.602	0	-3.55e-15	0
G	105	T	Special	Polar	3.29	5.6	2.31	75	119	44	60.1	116.1	56	59	0.3	S	S	N	P	B	L	351.384	351.193	352.363	loop	surface	surface.internal	0.471154	0	0	0	0	245.19	5.03727	26.9132	-0.0144648	0	-3.09408	0	6.42325	-3.09354	9.54855	0.98171	12.0074	4.15442	3.93104	0	3.55e-15	0
G	105	V	Special	Hydrophobic	3.29	5.61	2.32	75	117	42	60.1	140	79.9	109	-4.6	S	S	N	N	B	B	351.384	351.193	352.363	loop	surface	surface.internal	0.471154	0	0	0	0	397.28	5.11945	24.9971	0.0118417	0	-4.06115	0	4.97013	-5.75751	9.91918	1.05153	12.675	6.18809	5.0042	0	-3.55e-15	0
G	105	Y	Special	Hydrophobic	3.29	5.66	2.37	75	181	106	60.1	193.6	133.5	147	0.9	S	B	N	N	B	B	351.384	351.193	352.363	loop	surface	surface.internal	0.471154	0	0	0	0	379.53	3.72291	18.4617	0.0232259	0	-3.42339	0	4.06333	-4.71637	9.3315	1.21401	11.78	0.189434	3.67021	0	7.11e-15	0
V	106	A	Hydrophobic	Hydrophobic	5.61	6	0.39	117	89	-28	140	88.6	-51.4	64	2.4	S	S	N	N	B	B	351.788	352.24	354.048	loop	interface	interface	0.172414	1	0	0	0	-122.05	0.403229	1.70447	0	0	3.39465	0	-3.20118	5.34762	-0.0307186	-2.06408	-1.57379	-0.168028	-0.649988	0	0	0
V	106	C	Hydrophobic	Special	5.61	5.07	-0.54	117	121	4	140	108.5	-31.5	192	1.7	S	S	N	P	B	C	351.788	352.24	354.048	loop	interface	interface	0.172414	1	0	0	0	-138.82	0.513212	2.44104	0	0	1.56048	0	-2.21139	3.18553	-0.0160086	0.190578	-0.101201	-0.166954	-0.72147	0	0	0
V	106	D	Hydrophobic	negativeCharge	5.61	5.05	-0.56	117	133	16	140	111.1	-28.9	152	7.7	S	S	N	-	B	L	351.788	352.24	354.048	loop	interface	interface	0.172414	1	0	0	0	-204.64	0.410253	1.79962	-1.63559	-3.15438	2.16591	-1.7639	1.49619	4.58919	-1.49774	2.30954	-0.111006	0.151002	-1.10989	8.34e-08	-0.749582	8.3e-08
V	106	E	Hydrophobic	negativeCharge	5.61	3.22	-2.39	117	147	30	140	138.4	-1.6	121	7.7	S	B	N	-	B	L	351.788	352.24	354.048	loop	interface	interface	0.172414	1	0	0	0	-204.61	-0.197464	-0.424963	-3.45881	-5.50802	1.09647	-1.28621	1.67432	2.74059	-1.34916	6.26492	0.157876	-0.00407271	-1.03907	8.34e-08	-0.752858	8.3e-08
V	106	F	Hydrophobic	Hydrophobic	5.61	3.32	-2.29	117	165	48	140	189.9	49.9	50	1.4	S	B	N	N	B	B	351.788	352.24	354.048	loop	interface	interface	0.172414	1	0	0	0	7.17	-0.547576	-2.15303	0.196514	-1.66106	-2.98887	0.79442	2.89054	-3.64817	-0.988514	3.15676	0.0902738	-0.130414	0.0177378	8.34e-08	0.135486	8.3e-08
V	106	G	Hydrophobic	Special	5.61	3.29	-2.32	117	75	-42	140	60.1	-79.9	109	4.6	S	S	N	N	B	B	351.788	352.24	354.048	loop	interface	interface	0.172414	1	0	0	0	-132.64	1.08777	6.00307	0	0	5.7595	0	-5.33099	9.23145	-0.0644785	-2.11566	-1.28561	-0.19113	-1.25812	0	0	0
V	106	H	Hydrophobic	PositiveCharge	5.61	7.59	1.98	117	155	38	140	153.2	13.2	84	7.4	S	B	N	+	B	L	351.788	352.24	354.048	loop	interface	interface	0.172414	1	0	0	0	-132.73	0.662382	4.2038	-0.53346	-0.483234	-2.12204	-0.0521113	4.49184	-0.777748	0.670195	1.82192	1.03334	-0.154032	0.157112	0	0	0.30913
V	106	I	Hydrophobic	Hydrophobic	5.61	6.02	0.41	117	131	14	140	166.7	26.7	29	-0.3	S	B	N	N	B	B	351.788	352.24	354.048	loop	interface	interface	0.172414	1	0	0	0	-4.95	-0.438525	-1.65682	0	0	-3.02791	-0.038215	2.74949	-5.35649	0.445351	1.81211	0.797039	0.961802	0.879774	0	0	0
V	106	L	Hydrophobic	Hydrophobic	5.61	9.71	4.1	117	131	14	140	166.7	26.7	32	0.4	S	B	N	N	B	B	351.788	352.24	354.048	loop	interface	interface	0.172414	1	0	0	0	-60.27	-0.664641	-4.01386	0	0	-2.61124	-0.0192287	1.77868	-4.7006	0.12069	1.90649	-0.385195	-0.103464	0.213784	0	0	0
V	106	M	Hydrophobic	Hydrophobic	5.61	5.74	0.13	117	149	32	140	162.9	22.9	21	2.3	S	B	N	N	B	B	351.788	352.24	354.048	loop	interface	interface	0.172414	1	0	0	0	-116.79	-1.03777	-4.76946	-0.196514	-0.864944	-3.51715	-0.0487394	1.09043	-5.20283	1.65961	2.8103	-0.353819	-0.145801	-0.532988	-8.34e-08	-2.17e-09	-8.3e-08
V	106	N	Hydrophobic	Polar	5.61	5.47	-0.14	117	132	15	140	114.1	-25.9	133	7.7	S	S	N	P	B	L	351.788	352.24	354.048	loop	interface	interface	0.172414	1	0	0	0	-132.15	0.634197	4.69735	0	0	1.19131	0	0.467832	3.44007	-0.0126807	-0.0873409	-0.137288	-0.164545	-0.812368	0	0	0
V	106	P	Hydrophobic	Special	5.61	6.3	0.69	117	115	-2	140	112.7	-27.3	68	5.8	S	P	N	N	B	P	351.788	352.24	354.048	loop	interface	interface	0.172414	1	0	0	0	-143.85	1.61304	8.56099	0	0	0.899905	0	-2.84138	0.790477	13.6429	-0.771194	-3.00743	-0.152261	-3.4386	0	0	0
V	106	Q	Hydrophobic	Polar	5.61	6.24	0.63	117	146	29	140	143.8	3.8	96	7.7	S	B	N	P	B	L	351.788	352.24	354.048	loop	interface	interface	0.172414	1	0	0	0	-132.37	-0.126762	0.447985	-2.17964	-4.10739	-0.530615	-0.626643	2.44776	1.17197	-1.484	5.0485	0.711248	-0.0987788	-1.06779	8.34e-08	0.0955676	8.3e-08
V	106	R	Hydrophobic	PositiveCharge	5.61	6.34	0.73	117	174	57	140	173.4	33.4	96	8.7	S	B	N	+	B	L	351.788	352.24	354.048	loop	interface	interface	0.172414	1	0	0	0	-185.7	-0.149054	1.20026	-0.751633	-0.0826472	-1.57288	-3.84324	5.68983	0.614579	-1.32407	3.73461	-1.79736	0.211219	-0.301057	0.00176617	0.320085	8.3e-08
V	106	S	Hydrophobic	Polar	5.61	5.68	0.07	117	105	-12	140	89	-51	124	5	S	S	N	P	B	L	351.788	352.24	354.048	loop	interface	interface	0.172414	1	0	0	0	-131.35	0.897645	4.707	0.196514	-1.24522	2.90676	0.0643304	-0.699245	6.62439	-1.46902	0.21768	-1.76881	-0.168338	-0.556857	8.34e-08	0.0479557	8.3e-08
V	106	T	Hydrophobic	Polar	5.61	5.6	-0.01	117	119	2	140	116.1	-23.9	69	4.9	S	S	N	P	B	L	351.788	352.24	354.048	loop	interface	interface	0.172414	1	0	0	0	-124.95	0.599475	4.03375	0	0	1.49705	0	0.388982	3.57679	-0.0286018	-0.47423	-0.796725	-0.129524	-0.694845	0	0	0
V	106	W	Hydrophobic	Hydrophobic	5.61	5.89	0.28	117	204	87	140	227.8	87.8	88	5.1	S	B	N	N	B	B	351.788	352.24	354.048	loop	interface	interface	0.172414	1	0	0	0	-26.48	0.0682306	2.27939	0	0	-6.9603	-0.251002	7.09521	-8.42923	5.65747	3.6334	1.66481	-0.130969	0.515889	0	0	0
V	106	Y	Hydrophobic	Hydrophobic	5.61	5.66	0.05	117	181	64	140	193.6	53.6	55	5.5	S	B	N	N	B	B	351.788	352.24	354.048	loop	interface	interface	0.172414	1	0	0	0	-84.7	-1.46826	-2.85625	-0.0141012	-6.06674	-4.15019	0.509027	6.18257	-4.27771	-1.03621	4.85892	1.0777	-0.153355	0.56307	0.00230762	0.211537	8.3e-08
W	107	A	Hydrophobic	Hydrophobic	5.89	6	0.11	204	89	-115	227.8	88.6	-139.2	148	-2.7	B	S	N	N	B	B	349.127	346.779	350.089	loop	interface	interface	0.375439	2	0	0	0	-5.24	2.91978	15.8323	0.196175	0.86459	9.1627	0.224966	-2.43187	15.9862	-1.74918	-6.22906	-0.0802914	-0.0462369	0.11672	8.34e-08	-0.0657058	8.3e-08
W	107	G	Hydrophobic	Special	5.89	3.29	-2.6	204	75	-129	227.8	60.1	-167.7	184	-0.5	B	S	N	N	B	B	349.127	346.779	350.089	loop	interface	interface	0.375439	2	0	0	0	-6.28	3.3512	17.5758	0.189551	0.865474	10.0409	0.219827	-3.31629	17.3651	-1.62974	-6.15852	0.116444	-0.0582968	0.0121873	8.34e-08	-0.0586221	8.3e-08
W	107	L	Hydrophobic	Hydrophobic	5.89	9.71	3.82	204	131	-73	227.8	166.7	-61.1	61	-4.7	B	B	N	N	B	B	349.127	346.779	350.089	loop	interface	interface	0.375439	2	0	0	0	-2.92	1.30285	7.18398	0.195662	0.865195	5.12845	0.00969814	-1.20117	7.84264	-1.5568	-3.63708	-0.496079	0.0368714	-0.00120213	8.34e-08	-0.00340964	8.3e-08
W	107	P	Hydrophobic	Special	5.89	6.3	0.41	204	115	-89	227.8	112.7	-115.1	147	0.7	B	P	N	N	B	P	349.127	346.779	350.089	loop	interface	interface	0.375439	2	0	0	0	-131.85	2.44341	13.3062	0.196181	0.86527	8.38292	0.205249	-3.24815	14.2316	-1.68048	-5.57849	0.0454165	-0.050644	0.451809	8.34e-08	-0.0627182	8.3e-08
W	107	R	Hydrophobic	PositiveCharge	5.89	6.34	0.45	204	174	-30	227.8	173.4	-54.4	101	3.6	B	B	N	+	B	L	349.127	346.779	350.089	loop	interface	interface	0.375439	2	0	0	0	-59.79	2.58748	12.4247	-2.2038	-1.53427	6.06141	0.268685	0.494039	11.7694	-1.72947	-1.87577	0.565386	0.382227	0.55685	8.34e-08	0.226854	8.3e-08
W	107	T	Hydrophobic	Polar	5.89	5.6	-0.29	204	119	-85	227.8	116.1	-111.7	128	-0.2	B	S	N	P	B	L	349.127	346.779	350.089	loop	interface	interface	0.375439	2	0	0	0	-5.98	2.45953	13.716	0.191842	0.864916	8.05889	0.174646	-1.56746	14.1568	-1.61208	-5.57897	-1.30065	0.389054	0.181857	8.34e-08	-0.0609452	8.3e-08
W	107	V	Hydrophobic	Hydrophobic	5.89	5.61	-0.28	204	117	-87	227.8	140	-87.8	88	-5.1	B	S	N	N	B	B	349.127	346.779	350.089	loop	interface	interface	0.375439	2	0	0	0	0.85	2.52103	13.2396	0.195811	0.865342	7.39455	0.182995	-0.530946	13.2249	-1.68246	-5.37928	-0.998747	0.0403271	0.263647	8.34e-08	-0.0728429	8.3e-08
W	107	Y	Hydrophobic	Hydrophobic	5.89	5.66	-0.23	204	181	-23	227.8	193.6	-34.2	37	0.4	B	B	N	N	B	B	349.127	346.779	350.089	loop	interface	interface	0.375439	2	0	0	0	-4.77	0.984545	5.78749	0	0	3.04567	0.206893	-0.963362	5.42179	-0.285884	-1.5252	-0.0880868	-0.0243316	0	0	0	0
P	108	A	Special	Hydrophobic	6.3	6	-0.3	115	89	-26	112.7	88.6	-24.1	27	-3.4	P	S	N	N	P	B	350.307	349.495	350.307	loop	core	core	0.0314465	0	0	0	0	357.13	3.22097	16.0485	0.156271	0	4.07451	0	0.831191	8.22066	-0.127367	-1.90828	4.74263	0.0588521	-0.0187147	0	0	0
P	108	C	Special	Special	6.3	5.07	-1.23	115	121	6	112.7	108.5	-4.2	169	-4.1	P	S	N	P	P	C	350.307	349.495	350.307	loop	core	core	0.0314465	0	0	0	0	299.35	3.96535	19.7582	-0.899377	-0.831083	-0.0819195	0	2.83941	3.60585	0.807539	3.14171	6.81322	4.36281	0.229548	0	0	0
P	108	D	Special	negativeCharge	6.3	5.05	-1.25	115	133	18	112.7	111.1	-1.6	108	1.9	P	S	N	-	P	L	350.307	349.495	350.307	loop	core	core	0.0314465	0	0	0	0	111.09	6.1573	32.0766	0.255347	1.42981	-0.474801	0.739552	17.0548	4.59724	1.28408	1.08033	5.8598	0.606224	0.189139	8.34e-08	-0.355806	8.3e-08
P	108	G	Special	Special	6.3	3.29	-3.01	115	75	-40	112.7	60.1	-52.6	42	-1.2	P	S	N	N	P	B	350.307	349.495	350.307	loop	core	core	0.0314465	0	0	0	0	258.42	4.26921	21.5566	0.157503	0	7.62153	0	-2.25161	13.9762	-0.399101	-2.70074	5.24984	-0.0970516	-0.616367	0	0	0
P	108	H	Special	PositiveCharge	6.3	7.59	1.29	115	155	40	112.7	153.2	40.5	77	1.6	P	B	N	+	P	L	350.307	349.495	350.307	loop	core	core	0.0314465	0	0	0	0	247.19	9.95082	52.1794	-0.0613239	-1.13986	-5.63732	-1.14e-13	13.84	-2.97461	35.9047	3.69643	7.75059	0.110473	0.631215	-3.55e-15	-2.49e-14	0.690379
P	108	I	Special	Hydrophobic	6.3	6.02	-0.28	115	131	16	112.7	166.7	54	95	-6.1	P	B	N	N	P	B	350.307	349.495	350.307	loop	core	core	0.0314465	0	0	0	0	568.69	4.48695	22.1014	-0.26958	-0.0358634	-6.26484	-0.282667	11.6341	-8.71167	9.58823	4.206	11.1741	1.06358	1.36711	0	0	0
P	108	K	Special	PositiveCharge	6.3	9.74	3.44	115	146	31	112.7	168.6	55.9	103	2.3	P	B	N	+	P	L	350.307	349.495	350.307	loop	core	core	0.0314465	0	0	0	0	447.74	6.48432	33.7048	-0.0841265	-0.616397	-4.79175	-0.724779	14.711	-4.08532	12.3504	7.08355	8.08598	1.61768	0.872043	-8.88e-16	0.158538	0
P	108	L	Special	Hydrophobic	6.3	9.71	3.41	115	131	16	112.7	166.7	54	98	-5.4	P	B	N	N	P	B	350.307	349.495	350.307	loop	core	core	0.0314465	0	0	0	0	526.85	7.38243	35.179	-1.10747	-0.359754	-4.65799	-0.203609	9.45932	-6.82461	23.1618	4.47371	9.55366	1.72986	1.18361	8.34e-08	-0.0459074	8.3e-08
P	108	N	Special	Polar	6.3	5.47	-0.83	115	132	17	112.7	114.1	1.4	91	1.9	P	S	N	P	P	L	350.307	349.495	350.307	loop	core	core	0.0314465	0	0	0	0	251.07	5.12851	25.8999	0.159947	0.864944	-1.81143	1.68e-06	12.1468	3.18025	0.461113	2.27664	7.04236	1.57922	0.134202	8.34e-08	2.17e-09	8.3e-08
P	108	R	Special	PositiveCharge	6.3	6.34	0.04	115	174	59	112.7	173.4	60.7	103	2.9	P	B	N	+	P	L	350.307	349.495	350.307	loop	core	core	0.0314465	0	0	0	0	435.77	6.60953	32.2721	-0.432571	-1.0371	-6.12731	-1.04312	15.0693	-1.93286	6.98426	8.18906	9.31972	2.94024	0.912485	8.34e-08	0.342532	8.3e-08
P	108	S	Special	Polar	6.3	5.68	-0.62	115	105	-10	112.7	89	-23.7	74	-0.8	P	S	N	P	P	L	350.307	349.495	350.307	loop	core	core	0.0314465	0	0	0	0	265.58	3.87759	19.4491	-1.87849	-1.86414	2.67085	0	5.30431	9.80604	-0.0252598	0.711568	4.62187	0.102308	0.0409554	0	0	0
P	108	T	Special	Polar	6.3	5.6	-0.7	115	119	4	112.7	116.1	3.4	38	-0.9	P	S	N	P	P	L	350.307	349.495	350.307	loop	core	core	0.0314465	0	0	0	0	332.09	4.21905	21.0538	-0.0824232	0	-0.985462	0	9.34186	2.00917	0.805295	1.53556	7.67004	0.759757	0.256291	0	0	0
P	108	V	Special	Hydrophobic	6.3	5.61	-0.69	115	117	2	112.7	140	27.3	68	-5.8	P	S	N	N	P	B	350.307	349.495	350.307	loop	core	core	0.0314465	0	0	0	0	571.12	3.33422	16.82	-0.287374	0	-3.043	-0.0751991	7.79201	-3.80967	4.68093	1.07289	8.96357	1.52584	0.577188	0	0	0
P	108	W	Special	Hydrophobic	6.3	5.89	-0.41	115	204	89	112.7	227.8	115.1	147	-0.7	P	B	N	N	P	B	350.307	349.495	350.307	loop	core	core	0.0314465	0	0	0	0	509.87	11.3176	52.0576	-0.297513	-0.237924	-7.933	-0.0866278	12.6655	-7.9214	36.1633	3.99413	10.8376	4.89456	1.51993	8.34e-08	-0.0210185	8.3e-08
P	108	Y	Special	Hydrophobic	6.3	5.66	-0.64	115	181	66	112.7	193.6	80.9	110	-0.3	P	B	N	N	P	B	350.307	349.495	350.307	loop	core	core	0.0314465	0	0	0	0	535.53	9.32529	49.8778	0.25402	0.857472	-4.76725	-0.0274661	9.05384	-4.04033	35.3266	2.79859	7.96123	2.46108	1.2721	8.34e-08	2.17e-09	8.3e-08
D	109	A	negativeCharge	Hydrophobic	5.05	6	0.95	133	89	-44	111.1	88.6	-22.5	126	-5.3	S	S	-	N	L	B	350.272	350.436	352.505	loop	surface	surface.internal	0.585492	0	0	0	0	9.44	0.0792918	1.01882	0	0	0.809317	1.09259	-1.12979	0.881724	1.33362	-1.31546	-1.55473	0.0134589	-0.0903622	0	0.888097	0
D	109	C	negativeCharge	Special	5.05	5.07	0.02	133	121	-12	111.1	108.5	-2.6	154	-6	S	S	-	P	L	C	350.272	350.436	352.505	loop	surface	surface.internal	0.585492	0	0	0	0	8.27	0.0935771	0.968189	0	0	0.165577	1.12992	-0.388274	0.288209	-0.00330667	-0.689128	-0.42269	-0.000850949	-0.0275676	0	0.888734	0
D	109	F	negativeCharge	Hydrophobic	5.05	3.32	-1.73	133	165	32	111.1	189.9	78.8	177	-6.3	S	B	-	N	L	B	350.272	350.436	352.505	loop	surface	surface.internal	0.585492	0	0	0	0	9.44	-0.308813	-1.2373	0	0	-2.60863	1.2227	2.18728	-3.77585	0.0639261	0.28277	0.492489	0.0109844	0.361756	0	0.887027	0
D	109	G	negativeCharge	Special	5.05	3.29	-1.76	133	75	-58	111.1	60.1	-51	94	-3.1	S	S	-	N	L	B	350.272	350.436	352.505	loop	surface	surface.internal	0.585492	0	0	0	0	8.12	-0.55845	-0.666177	0	0	1.93743	1.15094	-2.87383	2.18212	-2.13236	-1.40597	-0.403039	-0.00830118	-0.221457	0	0.886832	0
D	109	H	negativeCharge	PositiveCharge	5.05	7.59	2.54	133	155	22	111.1	153.2	42.1	81	-0.3	S	B	-	+	L	L	350.272	350.436	352.505	loop	surface	surface.internal	0.585492	0	0	0	0	9.29	-0.220124	0.135279	0	0	-0.547489	1.12846	0.660701	-0.594459	0.0395045	-0.750022	-0.94402	0.0108691	-0.144973	0	0.887822	0.243912
D	109	I	negativeCharge	Hydrophobic	5.05	6.02	0.97	133	131	-2	111.1	166.7	55.6	168	-8	S	B	-	N	L	B	350.272	350.436	352.505	loop	surface	surface.internal	0.585492	0	0	0	0	9.44	1.18245	6.46184	0	0	-3.04005	1.02258	3.91226	-4.23646	-1.07908	0.340262	8.59072	0.0642609	0.50775	0	0.887348	0
D	109	K	negativeCharge	PositiveCharge	5.05	9.74	4.69	133	146	13	111.1	168.6	57.5	101	0.4	S	B	-	+	L	L	350.272	350.436	352.505	loop	surface	surface.internal	0.585492	0	0	0	0	3.66	-0.0864674	0.0644142	0	0	-1.2959	1.29027	0.875889	-1.93309	0.155003	-0.35847	0.174356	0.0256837	-0.00525857	0	1.13068	0
D	109	L	negativeCharge	Hydrophobic	5.05	9.71	4.66	133	131	-2	111.1	166.7	55.6	172	-7.3	S	B	-	N	L	B	350.272	350.436	352.505	loop	surface	surface.internal	0.585492	0	0	0	0	9.28	0.449824	2.51214	0	0	-1.64927	1.12838	1.97822	-2.32691	0.206336	-0.273809	2.36997	0.191934	0.205199	0	0.887286	0
D	109	M	negativeCharge	Hydrophobic	5.05	5.74	0.69	133	149	16	111.1	162.9	51.8	160	-5.4	S	B	-	N	L	B	350.272	350.436	352.505	loop	surface	surface.internal	0.585492	0	0	0	0	9.44	0.312862	1.8977	0	0	-2.86708	1.12762	2.58423	-4.08132	0.320644	0.378762	3.51007	0.0374604	0.246459	0	0.887313	0
D	109	P	negativeCharge	Special	5.05	6.3	1.25	133	115	-18	111.1	112.7	1.6	108	-1.9	S	P	-	N	L	P	350.272	350.436	352.505	loop	surface	surface.internal	0.585492	0	0	0	0	1.93	1.73354	9.65829	0	0	-1.52653	0.96381	0.37764	-2.64043	4.4758	-0.044804	6.39698	0.768866	0.11474	0	0.886963	0
D	109	Q	negativeCharge	Polar	5.05	6.24	1.19	133	146	13	111.1	143.8	32.7	61	0	S	B	-	P	L	L	350.272	350.436	352.505	loop	surface	surface.internal	0.585492	0	0	0	0	9.18	-0.457185	0.246972	-1.04133	-0.3729	-1.08061	1.0177	1.752	-1.1221	-0.870181	0.794111	0.166696	0.0714298	0.0769757	8.34e-08	0.932173	8.3e-08
D	109	R	negativeCharge	PositiveCharge	5.05	6.34	1.29	133	174	41	111.1	173.4	62.3	96	1	S	B	-	+	L	L	350.272	350.436	352.505	loop	surface	surface.internal	0.585492	0	0	0	0	3.66	-0.293769	0.25029	0	0	-1.23539	1.41131	0.629259	-1.59135	0.0704085	-0.494192	-0.341627	0.342701	-0.0341324	0	1.45917	0
D	109	S	negativeCharge	Polar	5.05	5.68	0.63	133	105	-28	111.1	89	-22.1	65	-2.7	S	S	-	P	L	L	350.272	350.436	352.505	loop	surface	surface.internal	0.585492	0	0	0	0	8.94	-0.4096	-1.14386	-2.72061	-2.0668	0.429374	1.11393	-0.0850733	1.18705	-1.39642	1.13339	0.378365	-0.00360376	-0.101833	-7.2e-05	0.886615	8.3e-08
D	109	T	negativeCharge	Polar	5.05	5.6	0.55	133	119	-14	111.1	116.1	5	85	-2.8	S	S	-	P	L	L	350.272	350.436	352.505	loop	surface	surface.internal	0.585492	0	0	0	0	9.13	0.291688	1.60413	-0.556049	-0.556049	-0.225769	1.0452	1.27517	0.419894	-1.30405	-0.540803	0.843758	0.320659	0.091305	0	0.882177	0
D	109	V	negativeCharge	Hydrophobic	5.05	5.61	0.56	133	117	-16	111.1	140	28.9	152	-7.7	S	S	-	N	L	B	350.272	350.436	352.505	loop	surface	surface.internal	0.585492	0	0	0	0	9.44	0.306508	2.24451	0	0	-1.16917	1.02178	2.56815	-0.807151	-1.25449	-0.783392	1.70502	0.0767136	0.279203	0	0.887046	0
D	109	Y	negativeCharge	Hydrophobic	5.05	5.66	0.61	133	181	48	111.1	193.6	82.5	160	-2.2	S	B	-	N	L	B	350.272	350.436	352.505	loop	surface	surface.internal	0.585492	0	0	0	0	9.1	-0.249397	-1.05694	-0.147717	0.711143	-2.11041	0.918645	2.41062	-2.94388	-1.18546	-0.184762	0.622032	-0.0161599	0.226502	8.34e-08	0.869008	8.3e-08
Y	110	A	Hydrophobic	Hydrophobic	5.66	6	0.34	181	89	-92	193.6	88.6	-105	112	-3.1	B	S	N	N	B	B	351.891	350.184	353.051	loop	surface	surface.internal	0.288973	0	0	0	0	0.05	1.97543	11.0546	0.354272	13.9425	9.33986	2.42546	-11.3901	11.9035	-2.01263	-11.1083	-2.05655	-0.426418	-0.490707	-0.00307325	0.0859718	8.3e-08
Y	110	C	Hydrophobic	Special	5.66	5.07	-0.59	181	121	-60	193.6	108.5	-85.1	194	-3.8	B	S	N	P	B	C	351.891	350.184	353.051	loop	surface	surface.internal	0.288973	0	0	0	0	-0.7	2.10366	11.6569	0.258613	14.5645	6.94116	1.8392	-8.91208	9.39751	-1.99474	-8.61737	-1.61814	-0.346265	-0.199537	0.0146514	0.129914	8.3e-08
Y	110	E	Hydrophobic	negativeCharge	5.66	3.22	-2.44	181	147	-34	193.6	138.4	-55.2	122	2.2	B	B	N	-	B	L	351.891	350.184	353.051	loop	surface	surface.internal	0.288973	0	0	0	0	-1.48	2.57317	12.6232	0.37423	14.2675	7.25188	4.52628	-8.95542	9.08376	-2.0094	-9.08149	-1.91058	-0.340734	-0.391774	0.0141342	-0.596958	8.3e-08
Y	110	G	Hydrophobic	Special	5.66	3.29	-2.37	181	75	-106	193.6	60.1	-133.5	147	-0.9	B	S	N	N	B	B	351.891	350.184	353.051	loop	surface	surface.internal	0.288973	0	0	0	0	-2.02	2.16625	12.5954	0.726371	12.594	11.1475	2.94188	-13.5247	14.5087	-2.14042	-10.7144	-2.5753	-0.428189	-0.506817	-0.0188549	0.0788602	8.3e-08
Y	110	H	Hydrophobic	PositiveCharge	5.66	7.59	1.93	181	155	-26	193.6	153.2	-40.4	83	1.9	B	B	N	+	B	L	351.891	350.184	353.051	loop	surface	surface.internal	0.288973	0	0	0	0	0.2	2.40597	12.6531	-1.5385	7.87422	5.71857	1.87418	-4.78169	8.47133	-1.85808	-5.70922	2.01296	0.2346	-0.113875	0.0149156	0.0717344	0.268122
Y	110	I	Hydrophobic	Hydrophobic	5.66	6.02	0.36	181	131	-50	193.6	166.7	-26.9	33	-5.8	B	B	N	N	B	B	351.891	350.184	353.051	loop	surface	surface.internal	0.288973	0	0	0	0	-0.62	2.3324	10.7622	0.477908	14.4752	4.67206	1.99592	-6.04053	5.05245	-2.0563	-7.85706	0.314797	-0.375075	0.0469868	0.0140611	0.088775	8.3e-08
Y	110	K	Hydrophobic	PositiveCharge	5.66	9.74	4.08	181	146	-35	193.6	168.6	-25	85	2.6	B	B	N	+	B	L	351.891	350.184	353.051	loop	surface	surface.internal	0.288973	0	0	0	0	16.47	1.6169	9.31882	0.274908	9.67453	5.82911	0.650658	-8.40016	6.57782	-1.83325	-2.02471	-1.52024	-0.267499	-0.228649	0.0143592	0.343293	8.3e-08
Y	110	L	Hydrophobic	Hydrophobic	5.66	9.71	4.05	181	131	-50	193.6	166.7	-26.9	36	-5.1	B	B	N	N	B	B	351.891	350.184	353.051	loop	surface	surface.internal	0.288973	0	0	0	0	-1.1	1.61057	8.96841	0.196533	15.4137	3.60169	1.67059	-5.91237	2.95091	-1.6968	-6.8225	-0.424189	-0.155777	0.0804946	0.0137622	0.132884	8.3e-08
Y	110	N	Hydrophobic	Polar	5.66	5.47	-0.19	181	132	-49	193.6	114.1	-79.5	143	2.2	B	S	N	P	B	L	351.891	350.184	353.051	loop	surface	surface.internal	0.288973	0	0	0	0	-0.25	2.82593	14.4045	0.457596	14.0099	7.55699	2.42436	-8.1349	10.3582	-2.03001	-9.74502	-0.256139	-0.339996	-0.152655	0.0143136	0.0892407	8.3e-08
Y	110	P	Hydrophobic	Special	5.66	6.3	0.64	181	115	-66	193.6	112.7	-80.9	110	0.3	B	P	N	N	B	P	351.891	350.184	353.051	loop	surface	surface.internal	0.288973	0	0	0	0	1.08	1.08882	6.3149	0.375427	13.8146	7.66607	2.27466	-10.966	9.00994	-1.84918	-8.95002	-4.81366	-0.347406	-0.259374	-0.00308459	0.10352	8.3e-08
Y	110	Q	Hydrophobic	Polar	5.66	6.24	0.58	181	146	-35	193.6	143.8	-49.8	99	2.2	B	B	N	P	B	L	351.891	350.184	353.051	loop	surface	surface.internal	0.288973	0	0	0	0	0.23	1.94383	11.1344	0.333543	13.0007	6.51324	2.30165	-8.70904	7.84584	-1.99186	-6.60605	-1.40132	-0.257433	-0.347152	-0.00387972	0.10909	8.3e-08
Y	110	R	Hydrophobic	PositiveCharge	5.66	6.34	0.68	181	174	-7	193.6	173.4	-20.2	77	3.2	B	B	N	+	B	L	351.891	350.184	353.051	loop	surface	surface.internal	0.288973	0	0	0	0	16.56	0.796925	10.8686	0.451118	9.27203	5.91742	0.470173	-8.16559	7.59075	-1.85198	-2.03078	-1.46425	0.0415192	-0.470017	-0.00282088	0.641048	8.3e-08
Y	110	S	Hydrophobic	Polar	5.66	5.68	0.02	181	105	-76	193.6	89	-104.6	144	-0.5	B	S	N	P	B	L	351.891	350.184	353.051	loop	surface	surface.internal	0.288973	0	0	0	0	0.1	2.86735	14.0084	0.378076	13.8433	9.10061	2.47614	-9.57566	13.112	-2.04292	-10.2685	-2.6865	-0.412034	-0.320544	-0.00278805	0.0867735	8.3e-08
Y	110	T	Hydrophobic	Polar	5.66	5.6	-0.06	181	119	-62	193.6	116.1	-77.5	92	-0.6	B	S	N	P	B	L	351.891	350.184	353.051	loop	surface	surface.internal	0.288973	0	0	0	0	0.34	2.59633	13.9744	0.278953	15.1655	7.49364	1.86228	-8.42181	9.88638	-1.94486	-9.92183	-0.174955	-0.389091	-0.312695	0.0141008	0.126112	8.3e-08
Y	110	V	Hydrophobic	Hydrophobic	5.66	5.61	-0.05	181	117	-64	193.6	140	-53.6	55	-5.5	B	S	N	N	B	B	351.891	350.184	353.051	loop	surface	surface.internal	0.288973	0	0	0	0	-0.73	2.30967	12.2826	0.280624	15.1432	6.51686	1.74529	-7.98041	7.9173	-1.93117	-9.45005	0.244009	-0.340385	-0.198563	0.0147319	0.122574	8.3e-08
L	111	A	Hydrophobic	Hydrophobic	9.71	6	-3.71	131	89	-42	166.7	88.6	-78.1	96	2	B	S	N	N	B	B	355.282	356.323	358.819	loop	interface	interface	0.0597015	1	0	0	0	0	2.07441	13.2101	0.291357	0.188029	9.8417	1.43757	-8.86013	15.9017	-0.0898861	-5.04498	-0.326792	-0.128408	-0.954248	0	0	0
L	111	D	Hydrophobic	negativeCharge	9.71	5.05	-4.66	131	133	2	166.7	111.1	-55.6	172	7.3	B	S	N	-	B	L	355.282	356.323	358.819	loop	interface	interface	0.0597015	1	0	0	0	-0.05	3.88245	19.8782	0.221282	0.0637693	5.22398	-1.92342	7.36697	12.678	-0.0187578	-2.20636	0.0303432	0.0271494	-0.460721	0	-1.58469	-3.55e-15
L	111	E	Hydrophobic	negativeCharge	9.71	3.22	-6.49	131	147	16	166.7	138.4	-28.3	138	7.3	B	B	N	-	B	L	355.282	356.323	358.819	loop	interface	interface	0.0597015	1	0	0	0	0	3.33872	14.9935	-2.09699	-2.00228	2.07863	-2.33589	10.0444	8.31299	-1.33307	2.72095	0.998258	0.00537477	0.171938	8.34e-08	-1.39888	8.3e-08
L	111	G	Hydrophobic	Special	9.71	3.29	-6.42	131	75	-56	166.7	60.1	-106.6	138	4.2	B	S	N	N	B	B	355.282	356.323	358.819	loop	interface	interface	0.0597015	1	0	0	0	-0.15	3.28702	20.439	0.3178	0.36352	13.0515	2.24385	-12.7071	20.4837	-0.0640047	-5.37132	2.31159	-0.190392	-1.14386	0	0	0
L	111	H	Hydrophobic	PositiveCharge	9.71	7.59	-2.12	131	155	24	166.7	153.2	-13.5	99	7	B	B	N	+	B	L	355.282	356.323	358.819	loop	interface	interface	0.0597015	1	0	0	0	0.12	3.84721	26.497	-1.00329	-0.944777	-1.0519	0.314207	7.70912	4.47823	13.941	-0.358334	2.66994	-0.0145637	0.932405	-8.88e-16	-7.11e-15	0.757319
L	111	I	Hydrophobic	Hydrophobic	9.71	6.02	-3.69	131	131	0	166.7	166.7	0	5	-0.7	B	B	N	N	B	B	355.282	356.323	358.819	loop	interface	interface	0.0597015	1	0	0	0	0	1.18113	13.3088	-0.0203355	-0.0315075	0.00294569	-0.429202	1.09722	0.564463	7.29629	-0.137802	0.147774	4.81893	0.510438	0	0	0
L	111	M	Hydrophobic	Hydrophobic	9.71	5.74	-3.97	131	149	18	166.7	162.9	-3.8	15	1.9	B	B	N	N	B	B	355.282	356.323	358.819	loop	interface	interface	0.0597015	1	0	0	0	0	0.321854	2.87619	-0.0350956	0.016895	-2.23319	-0.106596	1.66004	-1.41218	0.00740991	2.15905	2.82374	-0.0038727	0.951468	0	-3.55e-15	0
L	111	N	Hydrophobic	Polar	9.71	5.47	-4.24	131	132	1	166.7	114.1	-52.6	153	7.3	B	S	N	P	B	L	355.282	356.323	358.819	loop	interface	interface	0.0597015	1	0	0	0	-0.04	2.23468	14.0813	-1.6239	-1.68259	4.1346	0.685745	1.41516	11.9076	0.120257	-1.40931	0.575395	-0.0416762	-0.419271	0	0	0
L	111	P	Hydrophobic	Special	9.71	6.3	-3.41	131	115	-16	166.7	112.7	-54	98	5.4	B	P	N	N	B	P	355.282	356.323	358.819	loop	interface	interface	0.0597015	1	0	0	0	-0.01	4.78738	28.13	5.3091	7.51657	7.2403	4.63331	-7.07415	10.7522	4.3326	-3.60056	-2.27094	1.39124	-1.30047	0.0132161	-0.112866	8.3e-08
L	111	S	Hydrophobic	Polar	9.71	5.68	-4.03	131	105	-26	166.7	89	-77.7	145	4.6	B	S	N	P	B	L	355.282	356.323	358.819	loop	interface	interface	0.0597015	1	0	0	0	-0.02	2.81292	14.6694	0.998194	-8.8706	8.72059	1.17626	-4.71366	17.5624	-1.37931	-2.59638	-0.162388	3.94065	-0.796751	0.000222534	-0.00659993	8.3e-08
L	111	T	Hydrophobic	Polar	9.71	5.6	-4.11	131	119	-12	166.7	116.1	-50.6	92	4.5	B	S	N	P	B	L	355.282	356.323	358.819	loop	interface	interface	0.0597015	1	0	0	0	0	2.57062	15.6247	1.08546	-4.57694	6.06503	1.36724	-1.69863	12.5312	3.91193	-2.52227	-0.941956	0.419281	-0.220009	0.000567725	-0.0162313	8.3e-08
L	111	V	Hydrophobic	Hydrophobic	9.71	5.61	-4.1	131	117	-14	166.7	140	-26.7	32	-0.4	B	S	N	N	B	B	355.282	356.323	358.819	loop	interface	interface	0.0597015	1	0	0	0	0	2.04145	16.2075	0.279667	1.03231	3.83622	0.0924899	-1.69508	7.1178	4.85978	-2.98417	-0.275144	3.94957	0.00764829	0.000665415	-0.00659885	8.3e-08
K	112	A	PositiveCharge	Hydrophobic	9.74	6	-3.74	146	89	-57	168.6	88.6	-80	106	-5.7	B	S	+	N	L	B	355.252	355.167	357.491	loop	interface	interface	0.601695	1	0	0	0	-1.36	-0.137964	-1.43842	0.220339	0.654605	2.55223	0.900765	-3.99044	3.18225	-0.0208226	-1.95615	-2.16269	-0.0271093	-1.70164	0	-0.791388	0
K	112	C	PositiveCharge	Special	9.74	5.07	-4.67	146	121	-25	168.6	108.5	-60.1	202	-6.4	B	S	+	P	L	C	355.252	355.167	357.491	loop	interface	interface	0.601695	1	0	0	0	-1.36	0.585838	1.26278	0.0243207	-0.246775	0.980554	0.915268	-1.90186	1.79882	-0.00272686	0.125986	0.331397	-0.00743513	-0.571076	0	-0.754761	0
K	112	D	PositiveCharge	negativeCharge	9.74	5.05	-4.69	146	133	-13	168.6	111.1	-57.5	101	-0.4	B	S	+	-	L	L	355.252	355.167	357.491	loop	interface	interface	0.601695	1	0	0	0	-1.36	-0.170877	-3.09541	-3.38475	-2.6361	1.14026	1.33332	-0.534274	2.02906	-0.0172756	1.24928	0.194597	0.232374	-0.703842	0	-2.7019	0
K	112	F	PositiveCharge	Hydrophobic	9.74	3.32	-6.42	146	165	19	168.6	189.9	21.3	102	-6.7	B	B	+	N	L	B	355.252	355.167	357.491	loop	interface	interface	0.601695	1	0	0	0	-1.36	0.00381005	-0.52355	0.019475	0.716313	-0.605212	0.495914	0.300511	-0.793911	-0.00377678	0.126104	-0.0448922	0.0177611	0.475111	0	-0.751837	0
K	112	G	PositiveCharge	Special	9.74	3.29	-6.45	146	75	-71	168.6	60.1	-108.5	127	-3.5	B	S	+	N	L	B	355.252	355.167	357.491	loop	interface	interface	0.601695	1	0	0	0	-1.36	0.556973	1.81662	0.335246	0	4.08585	0.703701	-5.82124	5.57585	-0.0764726	-1.69537	-0.535654	-0.0353416	-2.21514	0	-0.719946	0
K	112	H	PositiveCharge	PositiveCharge	9.74	7.59	-2.15	146	155	9	168.6	153.2	-15.4	32	-0.7	B	B	+	+	L	L	355.252	355.167	357.491	loop	interface	interface	0.601695	1	0	0	0	-1.24	0.695927	1.41758	-0.894023	-3.50343	0.804735	0.523204	0.509369	2.14766	-0.0409857	1.14047	0.810809	-0.00612255	-0.730804	0	-0.52241	0.448312
K	112	I	PositiveCharge	Hydrophobic	9.74	6.02	-3.72	146	131	-15	168.6	166.7	-1.9	102	-8.4	B	B	+	N	L	B	355.252	355.167	357.491	loop	interface	interface	0.601695	1	0	0	0	-1.36	0.779863	1.61971	0.173306	4.8493	-0.745207	1.3668	1.55565	-1.06965	-1.33516	-2.93895	0.458698	0.0772625	-0.338198	8.34e-08	-0.772336	8.3e-08
K	112	L	PositiveCharge	Hydrophobic	9.74	9.71	-0.03	146	131	-15	168.6	166.7	-1.9	107	-7.7	B	B	+	N	L	B	355.252	355.167	357.491	loop	interface	interface	0.601695	1	0	0	0	-1.36	-0.0420643	-1.13987	0.314905	4.76568	-0.583925	1.50583	0.256278	-1.33911	-1.32669	-3.03093	-1.03884	0.036789	0.233201	8.34e-08	-0.699568	-0.000287877
K	112	P	PositiveCharge	Special	9.74	6.3	-3.44	146	115	-31	168.6	112.7	-55.9	103	-2.3	B	P	+	N	L	P	355.252	355.167	357.491	loop	interface	interface	0.601695	1	0	0	0	-1.36	-1.47884	-7.96896	0.332159	3.74446	-0.069328	0.774863	-2.32105	-1.0394	-1.10559	-2.87025	-4.84167	0.0192959	-1.12818	8.34e-08	-0.592848	0.000391166
K	112	Q	PositiveCharge	Polar	9.74	6.24	-3.5	146	146	0	168.6	143.8	-24.8	53	-0.4	B	B	+	P	L	L	355.252	355.167	357.491	loop	interface	interface	0.601695	1	0	0	0	-1.36	0.587282	-1.46729	-2.33466	-3.71984	0.503177	0.8084	-0.00889	1.17162	-0.0176289	2.7666	0.105796	0.00548011	-0.622949	0	-0.747343	-3.55e-15
K	112	R	PositiveCharge	PositiveCharge	9.74	6.34	-3.4	146	174	28	168.6	173.4	4.8	26	0.6	B	B	+	+	L	L	355.252	355.167	357.491	loop	interface	interface	0.601695	1	0	0	0	0	-0.457478	-0.425217	0.426135	-7.04603	-0.425122	-0.273741	2.25233	0.869405	-1.34615	4.62146	-0.754958	0.532555	-0.195824	8.34e-08	0.746623	-0.0277155
K	112	S	PositiveCharge	Polar	9.74	5.68	-4.06	146	105	-41	168.6	89	-79.6	121	-3.1	B	S	+	P	L	L	355.252	355.167	357.491	loop	interface	interface	0.601695	1	0	0	0	-1.36	0.301072	0.999958	-2.85273	-0.978387	1.40895	0.663638	-0.954956	3.45547	-0.577255	-1.38983	1.46532	1.51877	-0.986322	8.34e-08	-0.759781	0.00074166
K	112	T	PositiveCharge	Polar	9.74	5.6	-4.14	146	119	-27	168.6	116.1	-52.5	78	-3.2	B	S	+	P	L	L	355.252	355.167	357.491	loop	interface	interface	0.601695	1	0	0	0	-1.36	0.766804	2.90737	-1.66062	0.725023	0.109848	0.887982	0.875682	1.01958	-0.255484	-1.95335	2.34672	1.48341	-0.300029	8.34e-08	-0.672733	0.00130537
K	112	V	PositiveCharge	Hydrophobic	9.74	5.61	-4.13	146	117	-29	168.6	140	-28.6	97	-8.1	B	S	+	N	L	B	355.252	355.167	357.491	loop	interface	interface	0.601695	1	0	0	0	-1.36	0.969156	2.68281	0.00715291	-2.27e-13	0.273283	0.644072	0.822215	1.00154	0.144044	-0.448738	0.660952	0.292685	-0.345728	0	-0.714397	0
K	112	W	PositiveCharge	Hydrophobic	9.74	5.89	-3.85	146	204	58	168.6	227.8	59.2	110	-3	B	B	+	N	L	B	355.252	355.167	357.491	loop	interface	interface	0.601695	1	0	0	0	-1.36	0.453926	0.95776	-0.394557	4.14868	-1.66491	1.25319	2.74443	-1.79788	-1.39843	-2.18444	0.859351	0.0850687	0.528138	8.34e-08	-0.692601	-0.000150498
K	112	Y	PositiveCharge	Hydrophobic	9.74	5.66	-4.08	146	181	35	168.6	193.6	25	85	-2.6	B	B	+	N	L	B	355.252	355.167	357.491	loop	interface	interface	0.601695	1	0	0	0	-1.36	0.152685	-0.880625	0.0272517	-2.18295	-0.363907	0.226519	0.895384	-0.0112464	0.00270544	1.24132	-0.152993	0.24274	0.00830156	0	-0.805441	-3.55e-15
D	113	A	negativeCharge	Hydrophobic	5.05	6	0.95	133	89	-44	111.1	88.6	-22.5	126	-5.3	S	S	-	N	L	B	357.049	356.465	359.339	helix	interface	interface	0.316062	2	0	0	0	-0.01	-0.221965	2.92015	-1.67086	4.50062	3.72275	5.5476	-9.21265	3.07829	-1.27811	-1.18019	-1.55319	-0.923292	-0.737667	-2.17e-05	1.94576	-0.0565442
D	113	C	negativeCharge	Special	5.05	5.07	0.02	133	121	-12	111.1	108.5	-2.6	154	-6	S	S	-	P	L	C	357.049	356.465	359.339	helix	interface	interface	0.316062	2	0	0	0	0	0.0846061	5.28213	-1.50853	4.25828	1.41392	5.09061	-7.39961	0.51561	-1.06513	2.31485	0.692403	-0.903334	-0.120747	8.34e-08	1.93765	-0.0645842
D	113	F	negativeCharge	Hydrophobic	5.05	3.32	-1.73	133	165	32	111.1	189.9	78.8	177	-6.3	S	B	-	N	L	B	357.049	356.465	359.339	helix	interface	interface	0.316062	2	0	0	0	-0.12	-0.120353	2.79061	-1.50761	6.86888	-2.6775	6.18035	-4.18802	-6.36525	-0.399915	2.30086	1.37906	-0.718721	0.884682	2.3e-05	2.18928	-0.27083
D	113	G	negativeCharge	Special	5.05	3.29	-1.76	133	75	-58	111.1	60.1	-51	94	-3.1	S	S	-	N	L	B	357.049	356.465	359.339	helix	interface	interface	0.316062	2	0	0	0	-0.01	0.0755624	8.12167	-1.05702	3.09331	5.38258	5.58773	-10.8576	5.94801	-0.70636	-0.999927	0.601078	-0.712065	-1.08434	8.34e-08	1.92195	-0.0799915
D	113	H	negativeCharge	PositiveCharge	5.05	7.59	2.54	133	155	22	111.1	153.2	42.1	81	-0.3	S	B	-	+	L	L	357.049	356.465	359.339	helix	interface	interface	0.316062	2	0	0	0	0.12	0.218256	3.42004	-1.14871	-0.0155719	-1.4942	4.83444	-0.842181	-1.90303	-1.04398	1.32348	1.95875	-0.385466	0.355805	8.34e-08	2.10232	0.0341837
D	113	I	negativeCharge	Hydrophobic	5.05	6.02	0.97	133	131	-2	111.1	166.7	55.6	168	-8	S	B	-	N	L	B	357.049	356.465	359.339	helix	interface	interface	0.316062	2	0	0	0	-0.01	-0.0735829	1.56399	-1.35189	5.22221	-2.64622	4.68398	-2.02877	-6.42342	-0.871298	2.92533	0.657515	-0.419249	0.99215	8.34e-08	1.87597	-0.0601788
D	113	L	negativeCharge	Hydrophobic	5.05	9.71	4.66	133	131	-2	111.1	166.7	55.6	172	-7.3	S	B	-	N	L	B	357.049	356.465	359.339	helix	interface	interface	0.316062	2	0	0	0	-0.01	-0.303189	0.518498	-1.22049	7.3555	-0.973176	5.3244	-6.12758	-4.85243	-0.736587	0.955055	-0.405914	-0.747202	0.538151	8.34e-08	2.17671	-0.229785
D	113	N	negativeCharge	Polar	5.05	5.47	0.42	133	132	-1	111.1	114.1	3	23	0	S	S	-	P	L	L	357.049	356.465	359.339	helix	interface	interface	0.316062	2	0	0	0	-0.01	0.0485753	0.998806	-0.53119	-4.03078	-0.37047	5.72436	-2.73908	-0.0902712	-0.835833	1.18722	1.00053	-0.273879	0.0647654	8.34e-08	2.2022	-0.243997
D	113	P	negativeCharge	Special	5.05	6.3	1.25	133	115	-18	111.1	112.7	1.6	108	-1.9	S	P	-	N	L	P	357.049	356.465	359.339	helix	interface	interface	0.316062	2	0	0	0	0	-1.49002	-3.97893	-0.95669	4.65241	1.64723	5.5269	-8.25732	0.340591	-0.956078	0.687133	-7.93279	-0.563912	-4.75404	8.34e-08	1.94436	-0.110757
D	113	R	negativeCharge	PositiveCharge	5.05	6.34	1.29	133	174	41	111.1	173.4	62.3	96	1	S	B	-	+	L	L	357.049	356.465	359.339	helix	interface	interface	0.316062	2	0	0	0	1.07	-0.649332	3.38768	-2.03168	5.49519	1.3389	4.89158	-7.68316	-0.390879	-1.251	1.60148	-0.822591	-0.866015	-0.14363	8.34e-08	3.1552	-0.0493434
D	113	S	negativeCharge	Polar	5.05	5.68	0.63	133	105	-28	111.1	89	-22.1	65	-2.7	S	S	-	P	L	L	357.049	356.465	359.339	helix	interface	interface	0.316062	2	0	0	0	-0.01	-0.0464776	6.16202	-1.42249	1.79795	1.99557	5.65629	-5.11982	3.36219	-0.921193	0.541373	-1.1645	-0.459157	-0.257283	8.34e-08	2.18178	-0.285981
D	113	T	negativeCharge	Polar	5.05	5.6	0.55	133	119	-14	111.1	116.1	5	85	-2.8	S	S	-	P	L	L	357.049	356.465	359.339	helix	interface	interface	0.316062	2	0	0	0	0	0.136514	8.37445	-0.739499	2.92529	0.778017	5.75023	-3.62373	0.746607	-1.11144	1.04474	1.03378	-0.385131	0.102612	8.34e-08	2.19027	-0.234697
D	113	W	negativeCharge	Hydrophobic	5.05	5.89	0.84	133	204	71	111.1	227.8	116.7	181	-2.6	S	B	-	N	L	B	357.049	356.465	359.339	helix	interface	interface	0.316062	2	0	0	0	-0.01	-0.117441	2.71205	-1.83043	5.85455	-3.4774	5.17414	-1.54747	-6.97868	-1.12864	4.21515	1.47886	-0.880658	1.0341	8.34e-08	1.92885	-0.096231
D	113	Y	negativeCharge	Hydrophobic	5.05	5.66	0.61	133	181	48	111.1	193.6	82.5	160	-2.2	S	B	-	N	L	B	357.049	356.465	359.339	helix	interface	interface	0.316062	2	0	0	0	-0.12	-0.100972	2.33391	-2.03239	4.67629	-2.26265	5.53203	-3.46993	-5.38955	-1.08939	4.0392	1.11873	-0.617635	0.792864	8.34e-08	1.91564	-0.086427
S	114	A	Polar	Hydrophobic	5.68	6	0.32	105	89	-16	89	88.6	-0.4	99	-2.6	S	S	P	N	L	B	359.401	359.329	361.122	helix	interface	interface	0.193548	2	0	0	0	0	0.12438	-1.46106	0.183584	6.49833	0.156034	-0.0633245	-1.64412	-1.96721	-1.38261	-4.38857	1.12426	0.00426224	-0.265741	8.34e-08	0.0183061	8.26e-08
S	114	D	Polar	negativeCharge	5.68	5.05	-0.63	105	133	28	89	111.1	22.1	65	2.7	S	S	P	-	L	L	359.401	359.329	361.122	helix	interface	interface	0.193548	2	0	0	0	0	0.167367	-0.691258	-1.01344	3.36555	-1.89055	-4.31149	8.43297	-2.96127	-1.05871	0.928065	-0.485641	0.0507594	0.594786	8.34e-08	-2.17986	0.432368
S	114	E	Polar	negativeCharge	5.68	3.22	-2.46	105	147	42	89	138.4	49.4	80	2.7	S	B	P	-	L	L	359.401	359.329	361.122	helix	interface	interface	0.193548	2	0	0	0	0	-0.0255711	-5.42604	0.152119	-0.313782	-2.25669	-3.21988	1.89175	-5.2023	-1.32602	5.23298	1.04196	0.00757665	0.616037	8.34e-08	-1.41688	-0.0168626
S	114	F	Polar	Hydrophobic	5.68	3.32	-2.36	105	165	60	89	189.9	100.9	155	-3.6	S	B	P	N	L	B	359.401	359.329	361.122	helix	interface	interface	0.193548	2	0	0	0	-0.01	0.251132	-3.15205	0.1433	10.8939	-4.65098	-0.107041	0.238219	-9.97317	-0.424846	-2.01498	1.70342	1.00991	1.42907	8.34e-08	-0.137911	0.168119
S	114	G	Polar	Special	5.68	3.29	-2.39	105	75	-30	89	60.1	-28.9	56	-0.4	S	S	P	N	L	B	359.401	359.329	361.122	helix	interface	interface	0.193548	2	0	0	0	0	0.347309	1.94877	-0.24879	4.52744	1.92092	-0.0939386	-2.03925	1.6052	-1.07327	-4.11486	1.44924	-0.0119734	-1.15787	8.34e-08	0.0557498	-0.0277155
S	114	H	Polar	PositiveCharge	5.68	7.59	1.91	105	155	50	89	153.2	64.2	89	2.4	S	B	P	+	L	L	359.401	359.329	361.122	helix	interface	interface	0.193548	2	0	0	0	0.11	0.695933	0.613898	0.106443	-0.993782	-4.4063	0.246808	6.34196	-6.90463	-1.14974	4.81864	1.92687	0.212689	1.03052	8.34e-08	0.00655077	0.408387
S	114	I	Polar	Hydrophobic	5.68	6.02	0.34	105	131	26	89	166.7	77.7	142	-5.3	S	B	P	N	L	B	359.401	359.329	361.122	helix	interface	interface	0.193548	2	0	0	0	-0.01	-0.325514	-4.55622	0.198007	5.97536	-4.69534	-0.0276265	2.28459	-10.3123	-1.18952	0.507864	2.54556	0.170482	1.95223	8.34e-08	0.0143756	-0.0277155
S	114	K	Polar	PositiveCharge	5.68	9.74	4.06	105	146	41	89	168.6	79.6	121	3.1	S	B	P	+	L	L	359.401	359.329	361.122	helix	interface	interface	0.193548	2	0	0	0	1.35	-0.0610854	-2.55332	0.11799	6.56109	-2.68644	0.322632	0.0252404	-6.79785	-1.26105	-0.490061	0.99877	0.00838737	1.00112	8.34e-08	0.615483	0.0324895
S	114	L	Polar	Hydrophobic	5.68	9.71	4.03	105	131	26	89	166.7	77.7	145	-4.6	S	B	P	N	L	B	359.401	359.329	361.122	helix	interface	interface	0.193548	2	0	0	0	-0.02	0.0278972	-4.94745	0.073254	7.37598	-3.93765	0.481876	1.1259	-9.25008	-1.16486	-0.628506	0.521054	0.414867	1.44678	8.34e-08	-0.0278237	0.0685333
S	114	N	Polar	Polar	5.68	5.47	-0.21	105	132	27	89	114.1	25.1	46	2.7	S	S	P	P	L	L	359.401	359.329	361.122	helix	interface	interface	0.193548	2	0	0	0	-0.01	-0.154077	-3.90518	0.119007	-2.97819	-2.18247	0.252223	3.23849	-3.57084	-1.11285	2.15493	0.0741176	0.0979108	0.752415	8.34e-08	-0.0273417	0.0298304
S	114	P	Polar	Special	5.68	6.3	0.62	105	115	10	89	112.7	23.7	74	0.8	S	P	P	N	L	P	359.401	359.329	361.122	helix	interface	interface	0.193548	2	0	0	0	0	0.470827	-3.50268	0.0921791	7.15522	-1.0199	0.0666879	-4.65064	-4.97332	4.23918	-3.7211	-0.828322	0.0271482	-5.01073	8.34e-08	0.0648195	0.045369
S	114	Q	Polar	Polar	5.68	6.24	0.56	105	146	41	89	143.8	54.8	68	2.7	S	B	P	P	L	L	359.401	359.329	361.122	helix	interface	interface	0.193548	2	0	0	0	-0.01	0.129095	-3.92904	0.319559	0.949018	-1.99169	0.28852	0.32495	-4.89949	-1.3461	1.62945	0.813551	0.0187909	0.69285	8.34e-08	-0.0356018	8.26e-08
S	114	R	Polar	PositiveCharge	5.68	6.34	0.66	105	174	69	89	173.4	84.4	110	3.7	S	B	P	+	L	L	359.401	359.329	361.122	helix	interface	interface	0.193548	2	0	0	0	1.35	0.0998848	-1.08705	0.307527	3.69487	-2.99552	-0.340892	2.05549	-5.88433	-1.32956	0.540958	1.13588	0.476069	0.511191	8.34e-08	1.26977	-0.0173288
S	114	T	Polar	Polar	5.68	5.6	-0.08	105	119	14	89	116.1	27.1	58	-0.1	S	S	P	P	L	L	359.401	359.329	361.122	helix	interface	interface	0.193548	2	0	0	0	0	0.374825	-0.0590546	-0.0664459	-0.910079	-1.61367	-0.0192438	2.2733	-3.49475	0.0414922	1.45044	1.59371	0.686186	0.666723	0	0	0
S	114	V	Polar	Hydrophobic	5.68	5.61	-0.07	105	117	12	89	140	51	124	-5	S	S	P	N	L	B	359.401	359.329	361.122	helix	interface	interface	0.193548	2	0	0	0	0	0.105151	-2.93693	0.100648	8.81189	-2.31788	0.250551	-0.383706	-6.65131	-1.24722	-3.19064	1.65685	0.138925	1.35964	8.34e-08	-0.0912109	-0.0138378
S	114	Y	Polar	Hydrophobic	5.68	5.66	-0.02	105	181	76	89	193.6	104.6	144	0.5	S	B	P	N	L	B	359.401	359.329	361.122	helix	interface	interface	0.193548	2	0	0	0	-0.01	0.0536559	0.198416	0.0675604	6.92056	-4.91556	0.655543	2.07919	-9.67946	-0.745776	0.737899	1.86615	3.1507	1.4223	8.34e-08	-0.0356174	0.0972311
E	115	A	negativeCharge	Hydrophobic	3.22	6	2.78	147	89	-58	138.4	88.6	-49.8	107	-5.3	B	S	-	N	L	B	360.477	359.821	361.231	helix	interface	interface	0.224215	2	0	0	0	0	0.503082	3.05707	4.67717	10.3817	4.99053	5.21267	-12.1716	4.51002	-1.39213	-11.8677	-2.74092	0.0846919	-0.529877	8.34e-08	1.3726	8.26e-08
E	115	F	negativeCharge	Hydrophobic	3.22	3.32	0.1	147	165	18	138.4	189.9	51.5	140	-6.3	B	B	-	N	L	B	360.477	359.821	361.231	helix	interface	interface	0.224215	2	0	0	0	0	-0.4381	0.487293	4.59143	7.64148	-2.1428	5.95511	-4.40546	-5.46879	-0.476395	-6.0267	-0.694921	-0.018428	1.36781	8.34e-08	1.53278	8.26e-08
E	115	H	negativeCharge	PositiveCharge	3.22	7.59	4.37	147	155	8	138.4	153.2	14.8	40	-0.3	B	B	-	+	L	L	360.477	359.821	361.231	helix	interface	interface	0.224215	2	0	0	0	0.12	0.407943	2.76042	4.58149	3.77363	-0.475096	5.17599	-2.66531	-0.99404	-1.23335	-5.7138	-1.4826	0.0697597	0.958953	8.34e-08	1.44938	0.274388
E	115	Q	negativeCharge	Polar	3.22	6.24	3.02	147	146	-1	138.4	143.8	5.4	29	0	B	B	-	P	L	L	360.477	359.821	361.231	helix	interface	interface	0.224215	2	0	0	0	0	0.222416	-0.333516	-2.74813	4.45799	0.0747265	5.9585	-5.92682	-0.338845	-1.38505	-3.17371	1.35123	0.00101233	1.18965	8.34e-08	1.39557	8.26e-08
E	115	R	negativeCharge	PositiveCharge	3.22	6.34	3.12	147	174	27	138.4	173.4	35	54	1	B	B	-	+	L	L	360.477	359.821	361.231	helix	interface	interface	0.224215	2	0	0	0	1.35	1.25707	6.52999	-0.0519181	4.17699	-2.19362	7.41596	-0.742518	-1.73826	0.31736	-2.65298	-0.766135	0.491513	1.63507	8.34e-08	2.2736	8.26e-08
E	115	S	negativeCharge	Polar	3.22	5.68	2.46	147	105	-42	138.4	89	-49.4	80	-2.7	B	S	-	P	L	L	360.477	359.821	361.231	helix	interface	interface	0.224215	2	0	0	0	0	0.745091	3.76627	1.54789	8.86265	3.96589	5.98909	-8.91927	5.65703	-1.32395	-10.184	-3.26424	0.00277656	0.535356	8.34e-08	1.43239	8.26e-08
E	115	T	negativeCharge	Polar	3.22	5.6	2.38	147	119	-28	138.4	116.1	-22.3	65	-2.8	B	S	-	P	L	L	360.477	359.821	361.231	helix	interface	interface	0.224215	2	0	0	0	0	0.84557	4.04963	1.85743	7.50043	3.1616	5.54227	-6.21777	4.14122	-1.11035	-9.45395	-3.13611	0.0432566	0.429029	8.34e-08	1.7216	8.26e-08
E	115	Y	negativeCharge	Hydrophobic	3.22	5.66	2.44	147	181	34	138.4	193.6	55.2	122	-2.2	B	B	-	N	L	B	360.477	359.821	361.231	helix	interface	interface	0.224215	2	0	0	0	0	0.393221	1.22743	4.58466	6.07409	-1.54895	5.33761	-3.9259	-3.94286	-1.24718	-5.03764	-0.601556	0.000660564	0.854117	8.34e-08	1.53451	8.26e-08
A	116	C	Hydrophobic	Special	6	5.07	-0.93	89	121	32	88.6	108.5	19.9	195	-0.7	S	S	N	P	B	C	361.16	361.512	363.06	loop	interface	interface	0.0310078	2	0	0	0	0	-0.00926976	-0.471922	-0.976962	-1.0125	-4.08239	-0.638796	4.03793	-3.42815	0.00901108	4.79601	0.688236	0.135688	1.45102	0	0	0
A	116	G	Hydrophobic	Special	6	3.29	-2.71	89	75	-14	88.6	60.1	-28.5	60	2.2	S	S	N	N	B	B	361.16	361.512	363.06	loop	interface	interface	0.0310078	2	0	0	0	0	0.320699	5.09071	0.220282	0	4.33483	0.677519	-4.50848	6.71472	-0.0146735	-0.00736184	-2.15368	-0.173199	-1.44374	0	0	0.000757934
A	116	H	Hydrophobic	PositiveCharge	6	7.59	1.59	89	155	66	88.6	153.2	64.6	86	5	S	B	N	+	B	L	361.16	361.512	363.06	loop	interface	interface	0.0310078	2	0	0	0	0.12	1.40441	54.9167	-2.34965	-2.834	-10.0603	-1.42349	17.1953	-9.64428	56.7828	4.22957	1.8234	0.384353	2.20704	0	-3.91e-14	0.813042
A	116	P	Hydrophobic	Special	6	6.3	0.3	89	115	26	88.6	112.7	24.1	27	3.4	S	P	N	N	B	P	361.16	361.512	363.06	loop	interface	interface	0.0310078	2	0	0	0	0	2.45129	21.4915	-0.0753141	0	-4.1048	-0.656167	0.584825	-7.2878	31.5899	1.43155	-0.0522766	0.0614969	-1.74477	0	0	0
A	116	R	Hydrophobic	PositiveCharge	6	6.34	0.34	89	174	85	88.6	173.4	84.8	112	6.3	S	B	N	+	B	L	361.16	361.512	363.06	loop	interface	interface	0.0310078	2	0	0	0	1.36	-2.50184	40.2232	-2.35891	-2.09772	-8.98726	-4.03899	19.5108	-6.49139	31.4604	9.31351	2.26075	0.266229	0.34223	-0.105024	1.49779	-0.00698451
A	116	S	Hydrophobic	Polar	6	5.68	-0.32	89	105	16	88.6	89	0.4	99	2.6	S	S	N	P	B	L	361.16	361.512	363.06	loop	interface	interface	0.0310078	2	0	0	0	0	0.141427	4.4784	-1.88782	-2.06177	-1.33291	-0.161842	5.55479	2.54204	0.369725	2.63903	-1.63098	0.448137	0.496317	0	0	0
A	116	T	Hydrophobic	Polar	6	5.6	-0.4	89	119	30	88.6	116.1	27.5	58	2.5	S	S	N	P	B	L	361.16	361.512	363.06	loop	interface	interface	0.0310078	2	0	0	0	0	0.608475	4.4901	-0.781632	-0.702999	-4.63858	-0.710363	8.62185	-3.99457	2.41938	2.60443	1.45674	0.215845	1.58445	0	0	0
T	117	A	Polar	Hydrophobic	5.6	6	0.4	119	89	-30	116.1	88.6	-27.5	58	-2.5	S	S	P	N	L	B	364.212	364.713	366.695	loop	interface	interface	0.0232558	2	0	0	0	0	1.32715	-1.31988	0	0.783411	3.50837	-0.00723034	-8.04837	3.08855	-0.476289	-2.60452	3.47994	-0.944962	-0.674326	0	0	-0.0987875
T	117	C	Polar	Special	5.6	5.07	-0.53	119	121	2	116.1	108.5	-7.6	149	-3.2	S	S	P	P	L	C	364.212	364.713	366.695	loop	interface	interface	0.0232558	2	0	0	0	0	-0.566502	-6.82813	-0.622872	1.50881	0.199278	-0.00529544	-5.37181	-0.177343	-0.758774	0.985899	-1.20628	-1.33492	-0.0368267	0	0	-0.044822
T	117	I	Polar	Hydrophobic	5.6	6.02	0.42	119	131	12	116.1	166.7	50.6	89	-5.2	S	B	P	N	L	B	364.212	364.713	366.695	loop	interface	interface	0.0232558	2	0	0	0	0	0.854748	4.61125	-0.191806	0.426766	-5.43564	0.0559409	2.33916	-10.9897	12.2675	2.436	4.46317	-0.871221	1.36311	-8.34e-08	2.67e-07	0.111044
T	117	L	Polar	Hydrophobic	5.6	9.71	4.11	119	131	12	116.1	166.7	50.6	92	-4.5	S	B	P	N	L	B	364.212	364.713	366.695	loop	interface	interface	0.0232558	2	0	0	0	0	-0.558451	12.9983	-0.0976417	1.45556	-5.46353	0.0256868	3.0179	-11.6948	21.5938	2.19483	-0.297741	2.25245	1.75544	0	0	0.0118608
T	117	N	Polar	Polar	5.6	5.47	-0.13	119	132	13	116.1	114.1	-2	65	2.8	S	S	P	P	L	L	364.212	364.713	366.695	loop	interface	interface	0.0232558	2	0	0	0	0	-0.0750909	3.53522	-4.41616	-3.48719	-2.29419	-0.0223064	3.35695	-0.834123	10.0316	1.05305	0.07625	0.130502	0.916024	-8.34e-08	2.67e-07	-0.0591915
T	117	P	Polar	Special	5.6	6.3	0.7	119	115	-4	116.1	112.7	-3.4	38	0.9	S	P	P	N	L	P	364.212	364.713	366.695	loop	interface	interface	0.0232558	2	0	0	0	0	0.402657	-8.28869	-0.196517	0.60098	0.441532	0.011369	-7.81057	-2.61577	1.16453	-1.11941	2.62965	-1.34417	-3.90449	-8.34e-08	2.67e-07	-0.0503133
T	117	Q	Polar	Polar	5.6	6.24	0.64	119	146	27	116.1	143.8	27.7	42	2.8	S	B	P	P	L	L	364.212	364.713	366.695	loop	interface	interface	0.0232558	2	0	0	0	0	1.01542	15.7089	-0.505405	1.10336	-4.18333	0.209155	7.16301	-3.51282	6.40618	4.39622	3.97947	0.509179	0.176157	8.34e-08	-2.67e-07	0.143907
T	117	S	Polar	Polar	5.6	5.68	0.08	119	105	-14	116.1	89	-27.1	58	0.1	S	S	P	P	L	L	364.212	364.713	366.695	loop	interface	interface	0.0232558	2	0	0	0	0	1.49873	2.97206	0	-2.32446	2.53068	0.00769274	-4.29556	4.80455	-0.38222	0.049212	3.52722	-0.868674	-0.187936	0	0	-0.0763703
T	117	V	Polar	Hydrophobic	5.6	5.61	0.01	119	117	-2	116.1	140	23.9	69	-4.9	S	S	P	N	L	B	364.212	364.713	366.695	loop	interface	interface	0.0232558	2	0	0	0	0	-0.203002	-0.119216	-0.195909	1.36713	-1.62125	0.0231955	-1.09473	-4.81277	8.12611	-0.254277	0.574983	-2.27221	0.474994	-8.34e-08	2.67e-07	0.0405159
A	118	H	Hydrophobic	PositiveCharge	6	7.59	1.59	89	155	66	88.6	153.2	64.6	86	5	S	B	N	+	B	L	363.009	362.364	363.3	loop	interface	interface	0.0387597	2	0	0	0	0.12	7.51324	45.5728	-0.25953	-0.184376	-8.99959	-0.015606	19.9567	-9.05576	34.2584	4.22612	2.04318	2.79019	2.15863	-8.88e-16	-7.11e-14	0.813042
A	118	I	Hydrophobic	Hydrophobic	6	6.02	0.02	89	131	42	88.6	166.7	78.1	94	-2.7	S	B	N	N	B	B	363.009	362.364	363.3	loop	interface	interface	0.0387597	2	0	0	0	0	0.145959	12.0041	-0.146313	0.642567	-8.52563	-0.0316374	9.94282	-15.1015	14.4908	4.60685	1.45089	4.67521	2.12275	8.34e-08	-2.67e-07	7.2e-08
A	118	P	Hydrophobic	Special	6	6.3	0.3	89	115	26	88.6	112.7	24.1	27	3.4	S	P	N	N	B	P	363.009	362.364	363.3	loop	interface	interface	0.0387597	2	0	0	0	0	-0.784892	-4.33403	0	-0.0735686	-2.96409	-0.0555475	0.754557	-5.75101	6.01327	1.26679	-3.69098	0.166538	-3.45465	0	0	0
A	118	S	Hydrophobic	Polar	6	5.68	-0.32	89	105	16	88.6	89	0.4	99	2.6	S	S	N	P	B	L	363.009	362.364	363.3	loop	interface	interface	0.0387597	2	0	0	0	0	0.224352	5.0862	-1.01732	-0.967776	-0.821458	0.0332805	3.28614	2.28061	0.0603715	2.64577	-0.448146	0.0347288	0.411004	0	0	0
A	118	T	Hydrophobic	Polar	6	5.6	-0.4	89	119	30	88.6	116.1	27.5	58	2.5	S	S	N	P	B	L	363.009	362.364	363.3	loop	interface	interface	0.0387597	2	0	0	0	0	1.01726	8.61243	-0.588296	-2.88886	-4.11462	-0.0906786	8.04081	-4.34839	9.4147	2.60587	-0.71977	1.30166	0.904224	0	0	0
A	118	V	Hydrophobic	Hydrophobic	6	5.61	-0.39	89	117	28	88.6	140	51.4	64	-2.4	S	S	N	N	B	B	363.009	362.364	363.3	loop	interface	interface	0.0387597	2	0	0	0	0	-0.141412	-0.0531613	-0.225404	-0.513181	-5.84469	-0.184951	6.28375	-10.0322	6.25837	2.13014	0.0619639	2.01303	1.68663	0	0	0
E	119	A	negativeCharge	Hydrophobic	3.22	6	2.78	147	89	-58	138.4	88.6	-49.8	107	-5.3	B	S	-	N	L	B	362.176	363.46	366.249	loop	interface	interface	0.00896861	6	0	0	0	0	0.274233	-10.4661	2.636	9.34893	7.83874	-8.34687	-19.2324	7.92953	-1.75173	-7.43128	-0.933799	0.286945	-0.838125	-3.53e-05	-0.810212	7.2e-08
E	119	C	negativeCharge	Special	3.22	5.07	1.85	147	121	-26	138.4	108.5	-29.9	170	-6	B	S	-	P	L	C	362.176	363.46	366.249	loop	interface	interface	0.00896861	6	0	0	0	0	0.175101	-13.1746	2.11675	8.01778	4.30157	-8.41602	-16.9168	4.16778	-1.68355	-3.08732	-1.21038	0.343194	-0.342609	0.000116586	-0.807769	7.2e-08
E	119	G	negativeCharge	Special	3.22	3.29	0.07	147	75	-72	138.4	60.1	-78.3	98	-3.1	B	S	-	N	L	B	362.176	363.46	366.249	loop	interface	interface	0.00896861	6	0	0	0	0	0.158711	-6.67404	2.97346	8.90747	11.0544	-7.73539	-22.9853	13.1071	-1.58088	-7.81498	-1.81335	-0.0307049	-1.55347	8.34e-08	-0.755852	7.2e-08
E	119	I	negativeCharge	Hydrophobic	3.22	6.02	2.8	147	131	-16	138.4	166.7	28.3	134	-8	B	B	-	N	L	B	362.176	363.46	366.249	loop	interface	interface	0.00896861	6	0	0	0	0	0.643218	-13.6164	2.18328	9.36849	-1.76314	-8.37832	-11.5077	-8.55321	5.38346	-2.11533	1.83069	0.748586	0.563848	0.000178874	-0.813337	7.2e-08
E	119	L	negativeCharge	Hydrophobic	3.22	9.71	6.49	147	131	-16	138.4	166.7	28.3	138	-7.3	B	B	-	N	L	B	362.176	363.46	366.249	loop	interface	interface	0.00896861	6	0	0	0	0	0.163633	-16.9316	2.39373	8.68294	-1.61363	-8.05246	-9.36086	-7.42372	-0.21277	-2.58663	1.0314	0.981636	0.704947	8.34e-08	-0.771223	7.2e-08
E	119	M	negativeCharge	Hydrophobic	3.22	5.74	2.52	147	149	2	138.4	162.9	24.5	126	-5.4	B	B	-	N	L	B	362.176	363.46	366.249	loop	interface	interface	0.00896861	6	0	0	0	0	0.325121	-17.408	2.02895	9.13178	-2.98033	-8.19423	-8.56863	-7.78128	-1.51061	-1.1661	1.79721	0.643461	-0.00722653	0.000344596	-0.808537	7.2e-08
E	119	P	negativeCharge	Special	3.22	6.3	3.08	147	115	-32	138.4	112.7	-25.7	93	-1.9	B	P	-	N	L	P	362.176	363.46	366.249	loop	interface	interface	0.00896861	6	0	0	0	0	-0.279455	-10.0214	2.46101	8.94653	3.17959	-7.9902	-18.3304	-0.549557	12.0935	-6.05584	-3.14027	0.180344	-5.76631	8.34e-08	-0.816131	7.2e-08
E	119	R	negativeCharge	PositiveCharge	3.22	6.34	3.12	147	174	27	138.4	173.4	35	54	1	B	B	-	+	L	L	362.176	363.46	366.249	loop	interface	interface	0.00896861	6	0	0	0	1.36	-0.0779316	-7.23068	1.52481	1.71163	-6.89319	-17.3531	7.97737	-3.55117	4.82544	1.60305	2.29869	1.8616	0.550334	0.000361945	-1.26366	0.0275485
E	119	S	negativeCharge	Polar	3.22	5.68	2.46	147	105	-42	138.4	89	-49.4	80	-2.7	B	S	-	P	L	L	362.176	363.46	366.249	loop	interface	interface	0.00896861	6	0	0	0	0	-0.0630877	-11.3448	1.81431	4.9417	6.97867	-8.11568	-16.6789	9.71113	-1.56119	-4.76583	-3.08999	0.229163	-0.476744	8.34e-08	-0.808223	7.2e-08
E	119	T	negativeCharge	Polar	3.22	5.6	2.38	147	119	-28	138.4	116.1	-22.3	65	-2.8	B	S	-	P	L	L	362.176	363.46	366.249	loop	interface	interface	0.00896861	6	0	0	0	0	0.536889	-5.09491	0.114894	5.36523	3.76853	-7.64953	-12.3422	4.17039	-0.283972	-4.56332	1.04857	6.03729	-0.103621	0.000147141	-0.760884	7.11e-15
E	119	V	negativeCharge	Hydrophobic	3.22	5.61	2.39	147	117	-30	138.4	140	1.6	121	-7.7	B	S	-	N	L	B	362.176	363.46	366.249	loop	interface	interface	0.00896861	6	0	0	0	0	0.763882	-15.6752	2.1572	8.38454	1.05045	-8.51702	-13.1492	-3.23382	-0.230396	-4.81806	2.53325	0.950783	0.423078	1.26e-05	-0.802931	8.88e-14
E	119	Y	negativeCharge	Hydrophobic	3.22	5.66	2.44	147	181	34	138.4	193.6	55.2	122	-2.2	B	B	-	N	L	B	362.176	363.46	366.249	loop	interface	interface	0.00896861	6	0	0	0	0	0.163837	-12.3073	2.35291	-0.0966073	-7.56263	-9.43431	-2.11096	-11.4796	11.2187	-2.96721	5.1455	3.44625	0.593316	0.000500773	-0.767394	-0.0523575
D	120	P	negativeCharge	Special	5.05	6.3	1.25	133	115	-18	111.1	112.7	1.6	108	-1.9	S	P	-	N	L	P	359.959	359.916	360.955	loop	interface	interface	0.0984456	2	0	0	0	0	1.21504	2.68869	2.34827	11.4654	0.952224	0.819829	-14.8038	-3.77171	9.68288	-1.32759	-3.19319	0.0710104	-6.09898	-0.279355	0.724683	8.53e-14
D	120	Q	negativeCharge	Polar	5.05	6.24	1.19	133	146	13	111.1	143.8	32.7	61	0	S	B	-	P	L	L	359.959	359.916	360.955	loop	interface	interface	0.0984456	2	0	0	0	0	1.2448	9.91185	1.67793	9.94165	-1.83111	0.821866	-4.23101	-3.353	0.500315	4.96606	1.40035	-0.430421	0.290944	-0.279296	0.728524	8.88e-14
D	120	R	negativeCharge	PositiveCharge	5.05	6.34	1.29	133	174	41	111.1	173.4	62.3	96	1	S	B	-	+	L	L	359.959	359.916	360.955	loop	interface	interface	0.0984456	2	0	0	0	1.36	1.362	6.649	-1.34404	8.28165	-3.16152	0.866158	-3.32309	-4.15637	0.416044	6.83169	0.962759	0.816186	0.0727183	-0.596767	1.05629	8.88e-14
Q	121	A	Polar	Hydrophobic	6.24	6	-0.24	146	89	-57	143.8	88.6	-55.2	91	-5.3	B	S	P	N	L	B	356.171	354.994	357.562	loop	interface	interface	0.408889	5	1	0	0	0	0.591693	3.93401	3.101	2.94792	4.21242	-0.00215455	-5.55422	4.76102	-0.0271113	-5.80745	0.466832	-0.164252	-0.140379	0	0	0
Q	121	C	Polar	Special	6.24	5.07	-1.17	146	121	-25	143.8	108.5	-35.3	154	-6	B	S	P	P	L	C	356.171	354.994	357.562	loop	interface	interface	0.408889	5	1	0	0	0	0.460426	2.96013	3.09379	2.96414	2.70644	0	-4.08815	3.23917	-0.0128782	-3.94166	-0.86435	-0.136378	-0.0963813	0	0	0
Q	121	D	Polar	negativeCharge	6.24	5.05	-1.19	146	133	-13	143.8	111.1	-32.7	61	0	B	S	P	-	L	L	356.171	354.994	357.562	loop	interface	interface	0.408889	5	1	0	0	0	0.593999	3.44455	3.08696	2.9905	2.8378	1.09812	-2.60192	3.38424	-0.025736	-4.55849	-1.96067	-0.161255	-0.0967161	0	-0.644998	0
Q	121	E	Polar	negativeCharge	6.24	3.22	-3.02	146	147	1	143.8	138.4	-5.4	29	0	B	B	P	-	L	L	356.171	354.994	357.562	loop	interface	interface	0.408889	5	1	0	0	0	0.116859	2.05152	3.12357	2.99614	1.61806	0.842843	-2.79452	1.13698	-0.0224698	-3.70288	-0.468618	-0.0568099	-0.0499374	0	-0.620782	0
Q	121	F	Polar	Hydrophobic	6.24	3.32	-2.92	146	165	19	143.8	189.9	46.1	116	-6.3	B	B	P	N	L	B	356.171	354.994	357.562	loop	interface	interface	0.408889	5	1	0	0	0	0.15855	-0.611398	2.99166	3.06114	0.12268	1.29e-07	-2.39761	-1.17084	0.0237953	-3.16699	0.0537975	-0.129035	0.00367793	-8.26e-14	4.9e-09	-8.53e-14
Q	121	G	Polar	Special	6.24	3.29	-2.95	146	75	-71	143.8	60.1	-83.7	87	-3.1	B	S	P	N	L	B	356.171	354.994	357.562	loop	interface	interface	0.408889	5	1	0	0	0	0.825346	6.98475	3.17351	2.89813	6.04739	-0.00133954	-7.51022	7.55685	-0.0237374	-6.15725	1.18851	-0.187089	-0.093169	0	0	0
Q	121	I	Polar	Hydrophobic	6.24	6.02	-0.22	146	131	-15	143.8	166.7	22.9	109	-8	B	B	P	N	L	B	356.171	354.994	357.562	loop	interface	interface	0.408889	5	1	0	0	0	0.240078	0.327372	2.83735	2.95118	-0.732081	0.00366613	-0.820398	-3.02788	0.15562	-2.67118	-0.988973	2.62004	-0.0241548	-5.13e-05	6.6e-05	-8.53e-14
Q	121	K	Polar	PositiveCharge	6.24	9.74	3.5	146	146	0	143.8	168.6	24.8	53	0.4	B	B	P	+	L	L	356.171	354.994	357.562	loop	interface	interface	0.408889	5	1	0	0	1.36	0.118479	-0.646636	0.246784	1.20013	0.394233	-0.428401	0.0217251	-0.664365	-0.0163644	-1.17151	-0.464911	-0.175843	0.0188164	-7.82e-14	0.411888	-8.53e-14
Q	121	L	Polar	Hydrophobic	6.24	9.71	3.47	146	131	-15	143.8	166.7	22.9	113	-7.3	B	B	P	N	L	B	356.171	354.994	357.562	loop	interface	interface	0.408889	5	1	0	0	0	0.17921	-2.07338	2.80692	2.99567	0.0950877	1.29e-07	-2.12076	-1.93957	-0.0926078	-2.92224	-0.781747	-0.114131	-0.0108988	-7.55e-14	4.9e-09	-8.53e-14
Q	121	M	Polar	Hydrophobic	6.24	5.74	-0.5	146	149	3	143.8	162.9	19.1	101	-5.4	B	B	P	N	L	B	356.171	354.994	357.562	loop	interface	interface	0.408889	5	1	0	0	0	0.14512	-2.19964	2.78544	3.03976	-0.84243	1.29e-07	-1.91329	-2.97358	-0.0072239	-2.75856	0.563851	-0.0936151	0.0190698	-8.08e-14	4.9e-09	-8.53e-14
Q	121	P	Polar	Special	6.24	6.3	0.06	146	115	-31	143.8	112.7	-31.1	76	-1.9	B	P	P	N	L	P	356.171	354.994	357.562	loop	interface	interface	0.408889	5	1	0	0	0	-0.585599	7.53518	6.71463	2.89993	1.7991	-0.0152248	-4.90197	0.0437105	8.02939	-3.96676	-4.33952	1.27188	0.0102553	0	7.11e-15	0
Q	121	R	Polar	PositiveCharge	6.24	6.34	0.1	146	174	28	143.8	173.4	29.6	43	1	B	B	P	+	L	L	356.171	354.994	357.562	loop	interface	interface	0.408889	5	1	0	0	1.36	-0.159442	-0.159127	-0.923554	-0.479881	-0.560265	-1.11502	0.778817	-0.314355	0.00217681	1.03082	0.600574	0.197178	0.049591	-8.97e-14	0.624385	-8.53e-14
Q	121	S	Polar	Polar	6.24	5.68	-0.56	146	105	-41	143.8	89	-54.8	68	-2.7	B	S	P	P	L	L	356.171	354.994	357.562	loop	interface	interface	0.408889	5	1	0	0	0	0.626982	6.32096	1.26806	1.12721	3.99738	0	-4.78752	5.80541	-0.019308	-3.2689	2.09442	0.104209	-0.139919	0	0	0
Q	121	T	Polar	Polar	6.24	5.6	-0.64	146	119	-27	143.8	116.1	-27.7	42	-2.8	B	S	P	P	L	L	356.171	354.994	357.562	loop	interface	interface	0.408889	5	1	0	0	0	0.323577	5.27511	1.54272	1.22906	1.80483	0.00050825	-1.22058	2.45496	0.252765	-2.98147	-0.384001	2.57632	-0.0808219	-7.11e-14	4.9e-09	-9.24e-14
Q	121	V	Polar	Hydrophobic	6.24	5.61	-0.63	146	117	-29	143.8	140	-3.8	96	-7.7	B	S	P	N	L	B	356.171	354.994	357.562	loop	interface	interface	0.408889	5	1	0	0	0	0.321705	-0.167747	2.74568	2.68018	0.887012	0.00425709	-2.09602	-0.24914	0.406651	-3.55477	-0.95698	-0.0346066	-0.0546182	-8.17e-14	4.9e-09	-9.95e-14
Q	121	Y	Polar	Hydrophobic	6.24	5.66	-0.58	146	181	35	143.8	193.6	49.8	99	-2.2	B	B	P	N	L	B	356.171	354.994	357.562	loop	interface	interface	0.408889	5	1	0	0	0	0.217575	-1.45238	2.81942	2.92488	-0.404588	1.29e-07	-1.91873	-1.89793	0.0667499	-2.84538	-0.0409004	-0.155903	0.0562956	-7.82e-14	4.9e-09	-9.95e-14
P	122	A	Special	Hydrophobic	6.3	6	-0.3	115	89	-26	112.7	88.6	-24.1	27	-3.4	P	S	N	N	P	B	355.391	354.861	355.589	loop	interface	interface	0.0628931	1	0	0	0	0	0.818227	8.86181	0.0621342	0.262026	2.66987	0.533541	-0.606863	4.2654	-0.152501	-1.60677	3.53842	-0.103445	-0.0790955	-8.53e-14	4.9e-09	-9.95e-14
P	122	C	Special	Special	6.3	5.07	-1.23	115	121	6	112.7	108.5	-4.2	169	-4.1	P	S	N	P	P	C	355.391	354.861	355.589	loop	interface	interface	0.0628931	1	0	0	0	0	1.41548	11.1137	0.0883135	-1.08088	-0.0645325	0.258941	2.20262	1.83542	-0.155073	2.67623	5.3386	0.0140688	-0.0778307	1.2e-13	-4.9e-09	6.04e-14
P	122	G	Special	Special	6.3	3.29	-3.01	115	75	-40	112.7	60.1	-52.6	42	-1.2	P	S	N	N	P	B	355.391	354.861	355.589	loop	interface	interface	0.0628931	1	0	0	0	0	1.20394	11.1221	0.0629345	0.403431	5.70461	0.913858	-4.35397	8.57995	-0.272893	-1.82425	2.06685	-0.158419	-0.0804121	0	0	0
P	122	H	Special	PositiveCharge	6.3	7.59	1.29	115	155	40	112.7	153.2	40.5	77	1.6	P	B	N	+	P	L	355.391	354.861	355.589	loop	interface	interface	0.0628931	1	0	0	0	0.12	2.2962	19.7174	0.223365	0.924861	-3.96754	-0.79132	10.6753	-1.58505	0.800584	2.76937	6.30672	3.83337	-0.0435828	0.000904323	0.000843048	0.526014
P	122	K	Special	PositiveCharge	6.3	9.74	3.44	115	146	31	112.7	168.6	55.9	103	2.3	P	B	N	+	P	L	355.391	354.861	355.589	loop	interface	interface	0.0628931	1	0	0	0	1.36	1.17896	12.9524	0.354008	-10.7116	-5.27996	-3.16861	16.2471	-4.29442	0.205986	10.6417	4.91969	2.98899	0.00661457	-0.0160041	1.065	0.000476912
P	122	L	Special	Hydrophobic	6.3	9.71	3.41	115	131	16	112.7	166.7	54	98	-5.4	P	B	N	N	P	B	355.391	354.861	355.589	loop	interface	interface	0.0628931	1	0	0	0	0	0.32068	9.35444	0.56613	1.21061	-4.97979	-1.23786	8.11022	-6.84716	0.0632268	3.51095	5.55947	3.34485	0.0388639	-0.0111278	0.0649199	4.97e-14
P	122	S	Special	Polar	6.3	5.68	-0.62	115	105	-10	112.7	89	-23.7	74	-0.8	P	S	N	P	P	L	355.391	354.861	355.589	loop	interface	interface	0.0628931	1	0	0	0	0	1.35968	11.4606	0.62809	-4.61379	1.52574	0.506668	3.75455	5.98613	1.91854	1.00012	0.749676	0.00492519	-0.0662699	6.39e-14	-4.9e-09	3.55e-15
P	122	T	Special	Polar	6.3	5.6	-0.7	115	119	4	112.7	116.1	3.4	38	-0.9	P	S	N	P	P	L	355.391	354.861	355.589	loop	interface	interface	0.0628931	1	0	0	0	0	2.95249	17.5259	-1.82644	-1.46548	-1.64152	0.220352	7.97482	1.1359	6.10824	1.48699	5.10176	0.431266	-0.0298364	6.48e-14	-4.9e-09	0
P	122	V	Special	Hydrophobic	6.3	5.61	-0.69	115	117	2	112.7	140	27.3	68	-5.8	P	S	N	N	P	B	355.391	354.861	355.589	loop	interface	interface	0.0628931	1	0	0	0	0	3.47132	18.2681	-0.139625	1.70617	-2.72969	-0.0989871	6.27812	-3.69	5.99665	0.853555	6.91551	3.17635	-0.108494	5.51e-14	-4.9e-09	-1.07e-14
T	123	A	Polar	Hydrophobic	5.6	6	0.4	119	89	-30	116.1	88.6	-27.5	58	-2.5	S	S	P	N	L	B	352.669	352.782	353.869	strand	interface	interface	0.343023	6	1	0	0	0	0.0977248	1.96595	0.0134281	0	1.44867	0	-2.75944	1.21762	-0.0199263	-1.07362	3.19786	-0.0586415	-0.0316967	0	0	0
T	123	C	Polar	Special	5.6	5.07	-0.53	119	121	2	116.1	108.5	-7.6	149	-3.2	S	S	P	P	L	C	352.669	352.782	353.869	strand	interface	interface	0.343023	6	1	0	0	0	-0.00277327	0.219761	-0.0497349	-1.05978	-0.22859	-1.32e-07	-1.54759	-0.287533	-0.0262652	1.23543	2.16108	0.0227405	-0.0594146	-3.82e-14	-4.9e-09	-1.42e-14
T	123	E	Polar	negativeCharge	5.6	3.22	-2.38	119	147	28	116.1	138.4	22.3	65	2.8	S	B	P	-	L	L	352.669	352.782	353.869	strand	interface	interface	0.343023	6	1	0	0	0	0.122096	0.779848	0.0133486	-9.64e-07	-0.713012	0.68294	-0.592749	-1.68586	0.0060855	0.51064	2.76283	-0.061525	0.0384903	0.0115682	-0.154411	1.07e-14
T	123	G	Polar	Special	5.6	3.29	-2.31	119	75	-44	116.1	60.1	-56	59	-0.3	S	S	P	N	L	B	352.669	352.782	353.869	strand	interface	interface	0.343023	6	1	0	0	0	0.800153	6.0257	0.0113011	0.019077	3.34204	0	-5.18031	3.99132	-0.0501866	-1.09141	5.05607	-0.0660145	-0.0362573	0	0	-0.00620235
T	123	H	Polar	PositiveCharge	5.6	7.59	1.99	119	155	36	116.1	153.2	37.1	47	2.5	S	B	P	+	L	L	352.669	352.782	353.869	strand	interface	interface	0.343023	6	1	0	0	0.12	-0.157178	0.259369	-0.0881931	-4.38469	-1.58366	-2.27e-13	1.73667	-1.64061	0.0659482	3.34575	2.52617	-0.0611832	0.0205936	-3.2e-14	9.59e-14	0.343184
T	123	I	Polar	Hydrophobic	5.6	6.02	0.42	119	131	12	116.1	166.7	50.6	89	-5.2	S	B	P	N	L	B	352.669	352.782	353.869	strand	interface	interface	0.343023	6	1	0	0	0	-0.95781	-4.42562	-0.332873	0.00537134	-3.99073	-0.00705226	3.59217	-7.03622	0.0200084	2.2136	1.0718	0.0387758	0.29678	-6.3e-05	-0.000399584	-3.55e-15
T	123	L	Polar	Hydrophobic	5.6	9.71	4.11	119	131	12	116.1	166.7	50.6	92	-4.5	S	B	P	N	L	B	352.669	352.782	353.869	strand	interface	interface	0.343023	6	1	0	0	0	-0.866679	-3.51156	0.00208154	0	-2.7529	0	0.880509	-5.40725	0.0261885	1.42516	2.30768	0.00697905	0.088662	0	0	0
T	123	P	Polar	Special	5.6	6.3	0.7	119	115	-4	116.1	112.7	-3.4	38	0.9	S	P	P	N	L	P	352.669	352.782	353.869	strand	interface	interface	0.343023	6	1	0	0	0	2.55748	13.0794	4.08122	-0.0726149	-0.531564	-0.00584342	-1.1024	-2.15481	6.40002	0.172241	6.35386	-0.0607389	0.0638675	7.99e-15	4.9e-09	7.11e-15
T	123	Q	Polar	Polar	5.6	6.24	0.64	119	146	27	116.1	143.8	27.7	42	2.8	S	B	P	P	L	L	352.669	352.782	353.869	strand	interface	interface	0.343023	6	1	0	0	0	-0.792332	-3.11431	-0.0676581	-5.38094	-1.35021	0	0.419728	-1.84397	0.119307	3.76609	1.26775	-0.0444058	-0.0146331	0	0	0
T	123	S	Polar	Polar	5.6	5.68	0.08	119	105	-14	116.1	89	-27.1	58	0.1	S	S	P	P	L	L	352.669	352.782	353.869	strand	interface	interface	0.343023	6	1	0	0	0	0.578075	3.96838	0.0133735	-9.64e-07	1.35539	1.32e-07	-1.83954	2.46274	-0.0223333	-0.31105	2.37303	-0.0632338	-0.0271358	8.88e-15	4.9e-09	7.11e-15
T	123	V	Polar	Hydrophobic	5.6	5.61	0.01	119	117	-2	116.1	140	23.9	69	-4.9	S	S	P	N	L	B	352.669	352.782	353.869	strand	interface	interface	0.343023	6	1	0	0	0	-0.384058	-1.25521	-0.0713983	-9.64e-07	-0.783602	1.32e-07	0.715189	-1.41245	-0.000247872	0.125684	0.232665	-0.0610526	0.00291224	6.31e-14	4.9e-09	1.07e-14
Q	124	A	Polar	Hydrophobic	6.24	6	-0.24	146	89	-57	143.8	88.6	-55.2	91	-5.3	B	S	P	N	L	B	349.805	349.629	351.163	loop	surface	surface.internal	0.36	0	0	0	0	0	0.806863	4.09424	0.0473002	4.85862	4.55769	0.22825	-5.84668	5.67578	-0.0238019	-5.47018	0.0536601	-0.00762059	-0.0300963	0.017373	0.0038499	-1.07e-14
Q	124	C	Polar	Special	6.24	5.07	-1.17	146	121	-25	143.8	108.5	-35.3	154	-6	B	S	P	P	L	C	349.805	349.629	351.163	loop	surface	surface.internal	0.36	0	0	0	0	0	0.387339	1.77147	-0.0321184	5.052	2.09874	0.102816	-4.03489	2.89349	-0.184717	-2.97864	-1.14137	-0.00384092	0.00601452	0	0	0
Q	124	E	Polar	negativeCharge	6.24	3.22	-3.02	146	147	1	143.8	138.4	-5.4	29	0	B	B	P	-	L	L	349.805	349.629	351.163	loop	surface	surface.internal	0.36	0	0	0	0	0	1.05291	3.90263	0.0108288	4.68272	1.26066	1.88866	-0.87656	1.23579	0.047915	-2.87928	-0.805312	-0.0648456	-0.0517848	0.0370006	-0.63494	-1.07e-14
Q	124	G	Polar	Special	6.24	3.29	-2.95	146	75	-71	143.8	60.1	-83.7	87	-3.1	B	S	P	N	L	B	349.805	349.629	351.163	loop	surface	surface.internal	0.36	0	0	0	0	0	2.50012	12.4378	0.0932753	4.98292	6.76046	0.237126	-8.46441	9.09676	-0.205082	-5.58912	5.70515	-0.178247	-0.1324	-0.000628279	-0.000378192	-1.07e-14
Q	124	I	Polar	Hydrophobic	6.24	6.02	-0.22	146	131	-15	143.8	166.7	22.9	109	-8	B	B	P	N	L	B	349.805	349.629	351.163	loop	surface	surface.internal	0.36	0	0	0	0	0	0.933155	3.96523	-0.00840705	4.69006	0.374477	0.0801431	-0.865083	-0.77065	0.010551	-2.95259	0.39457	2.98908	0.109698	0.0184853	0.0046005	-2.13e-14
Q	124	L	Polar	Hydrophobic	6.24	9.71	3.47	146	131	-15	143.8	166.7	22.9	113	-7.3	B	B	P	N	L	B	349.805	349.629	351.163	loop	surface	surface.internal	0.36	0	0	0	0	0	-0.26317	-1.03652	-0.0213593	5.052	-1.02386	-0.0143386	-0.698887	-3.84469	1.37296	-2.10296	-0.215122	0.459732	0.0517132	0	0	0
Q	124	N	Polar	Polar	6.24	5.47	-0.77	146	132	-14	143.8	114.1	-29.7	46	0	B	S	P	P	L	L	349.805	349.629	351.163	loop	surface	surface.internal	0.36	0	0	0	0	0	0.228143	3.849	-1.3496	1.15569	1.51398	0.107089	-0.430173	3.25752	2.38907	-2.23483	-0.78282	0.223074	0.116848	0	0	0
Q	124	P	Polar	Special	6.24	6.3	0.06	146	115	-31	143.8	112.7	-31.1	76	-1.9	B	P	P	N	L	P	349.805	349.629	351.163	loop	surface	surface.internal	0.36	0	0	0	0	0	2.07046	9.74312	0.0846431	4.88048	3.39809	0.218701	-6.0969	3.58789	0.0342691	-4.00361	7.79522	-0.15443	-0.0353494	-0.000849947	-0.000371016	-2.13e-14
Q	124	R	Polar	PositiveCharge	6.24	6.34	0.1	146	174	28	143.8	173.4	29.6	43	1	B	B	P	+	L	L	349.805	349.629	351.163	loop	surface	surface.internal	0.36	0	0	0	0	1.36	-0.325846	-1.32393	0.00819326	0.6315	-0.751274	-2.04783	-0.0157741	-0.749219	0.0788298	1.087	-0.53195	0.410577	-0.00012955	0	0.55602	0
Q	124	S	Polar	Polar	6.24	5.68	-0.56	146	105	-41	143.8	89	-54.8	68	-2.7	B	S	P	P	L	L	349.805	349.629	351.163	loop	surface	surface.internal	0.36	0	0	0	0	0	1.27552	6.12908	0.0273492	0.979199	3.69647	0.224834	-2.10425	6.86306	0.277751	-3.14885	-0.781135	0.0300437	0.0794662	0.0522284	0.0123806	-2.13e-14
[truncated: 8,356 more rows]
[truncated: 6 more columns]
