# Supplementary figures and images for: Globally defining the effects of mutations in a picornavirus capsid
Source: eLife journal article supplement (doi:10.7554/elife.64256), 2021-01-12

Figure 5-figure supplement 1

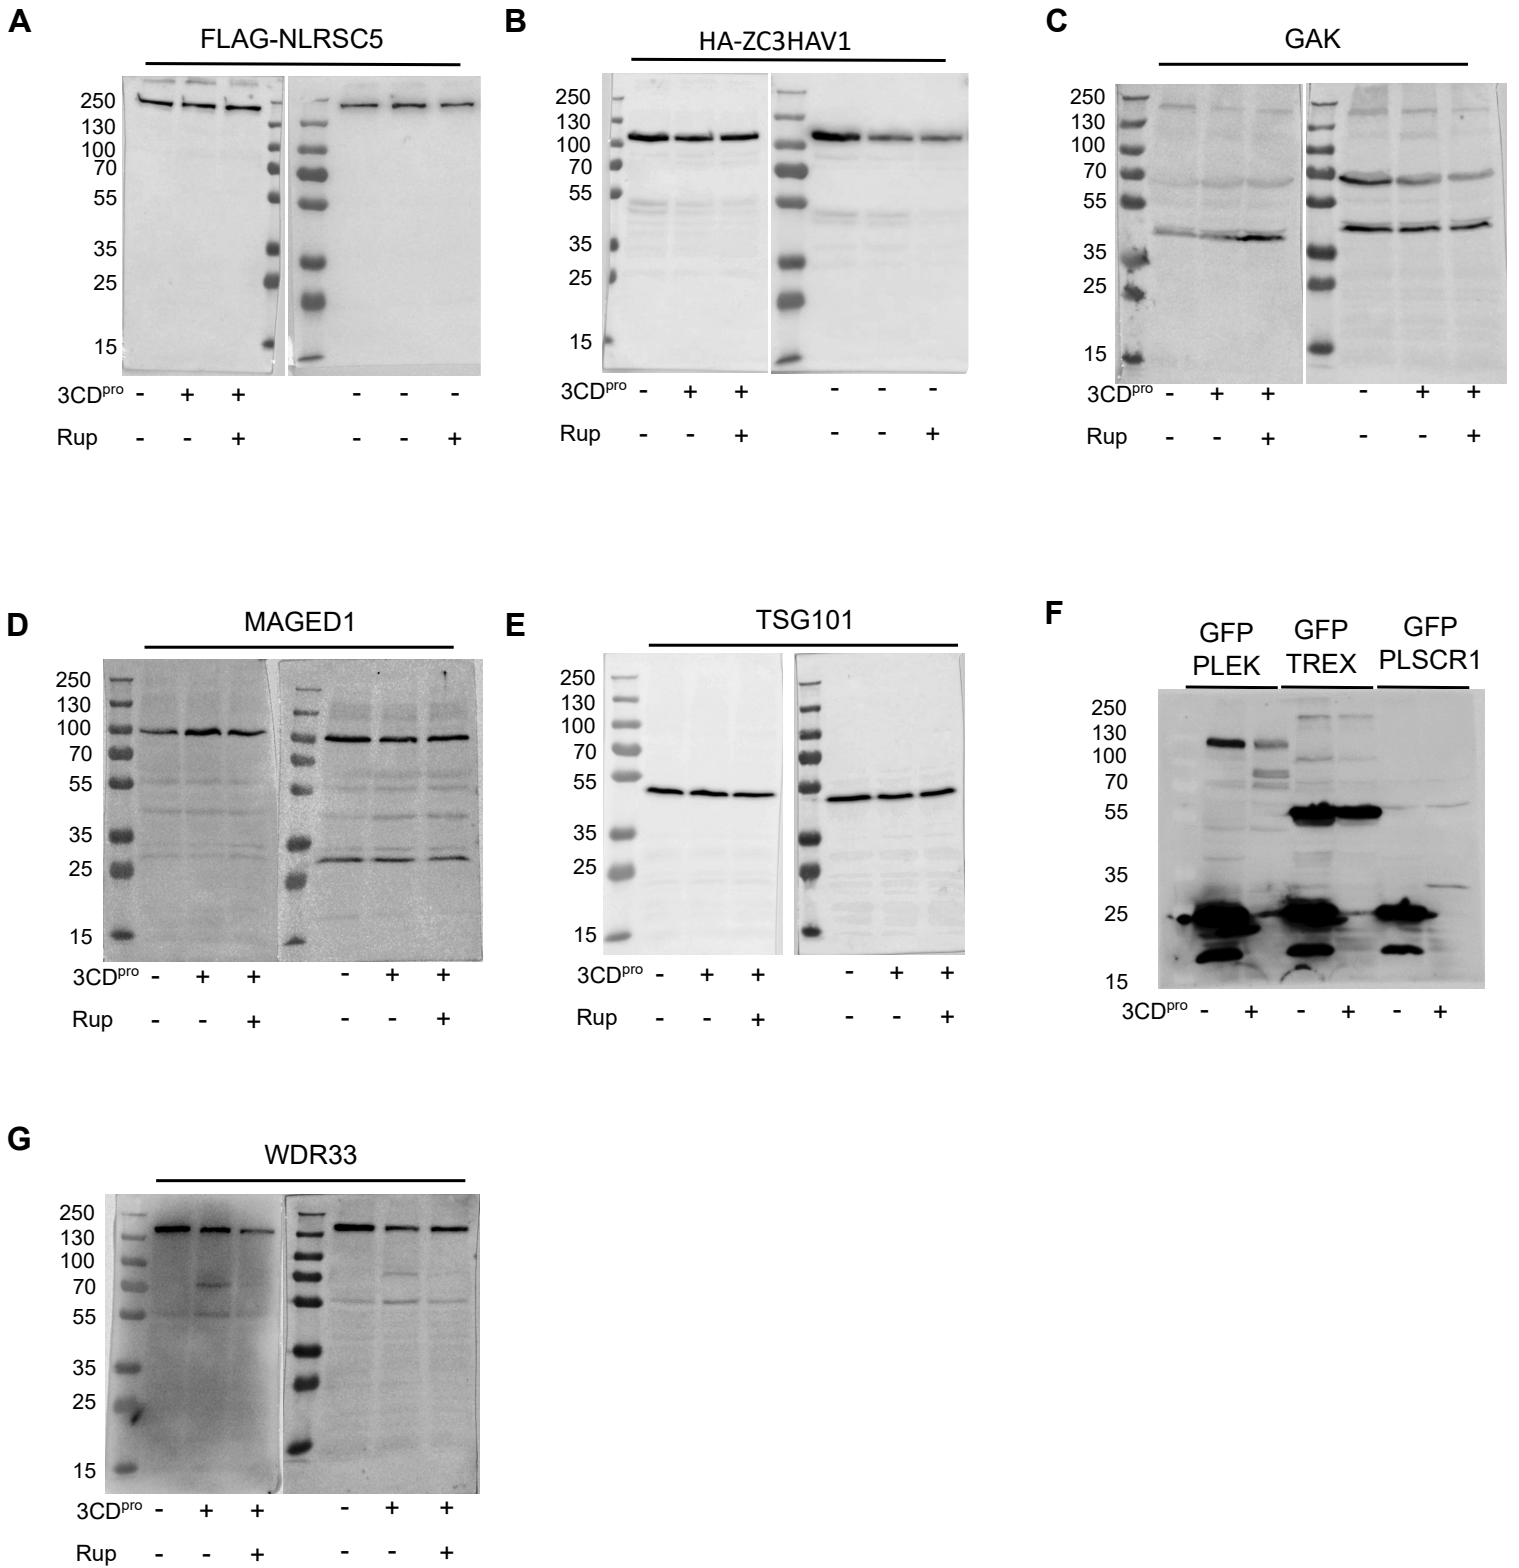

Supplement: supp [file elife-64256-supp-v1.zip]

**A**

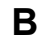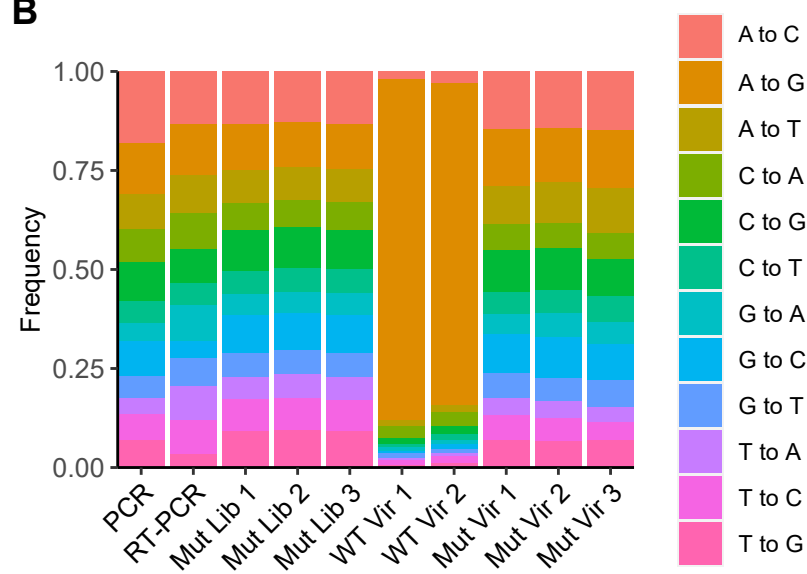

Supplement: supp [file elife-64256-supp-v1.zip]

Figure 3-figure supplement 1

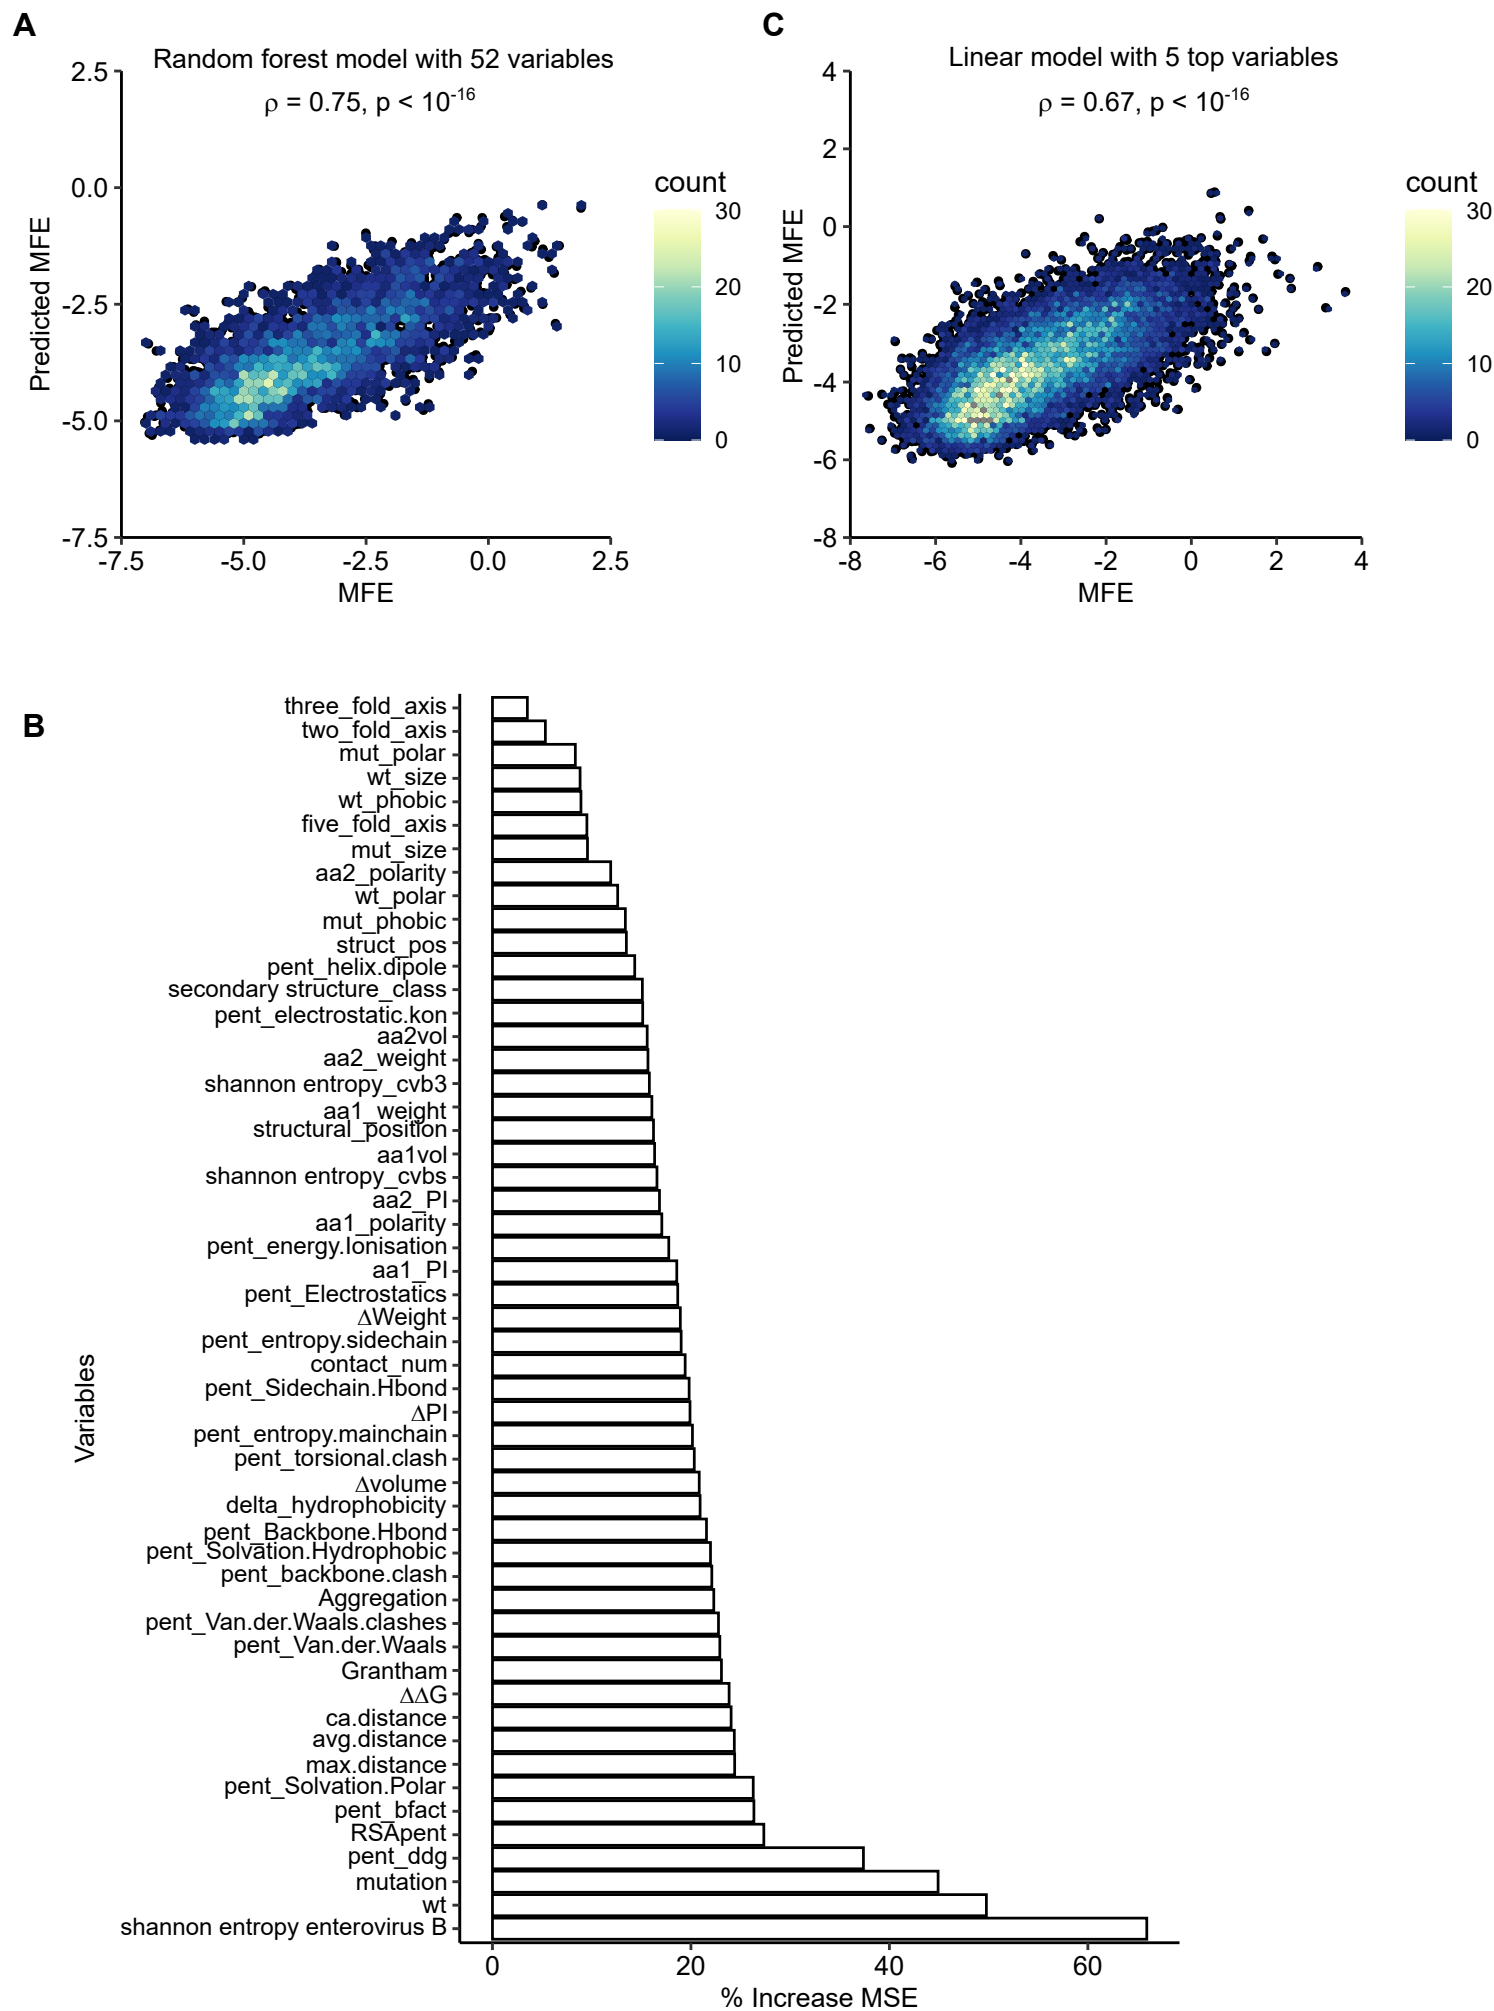

Supplement: supp [file elife-64256-supp-v1.zip]

Figure 4-figure supplement 1

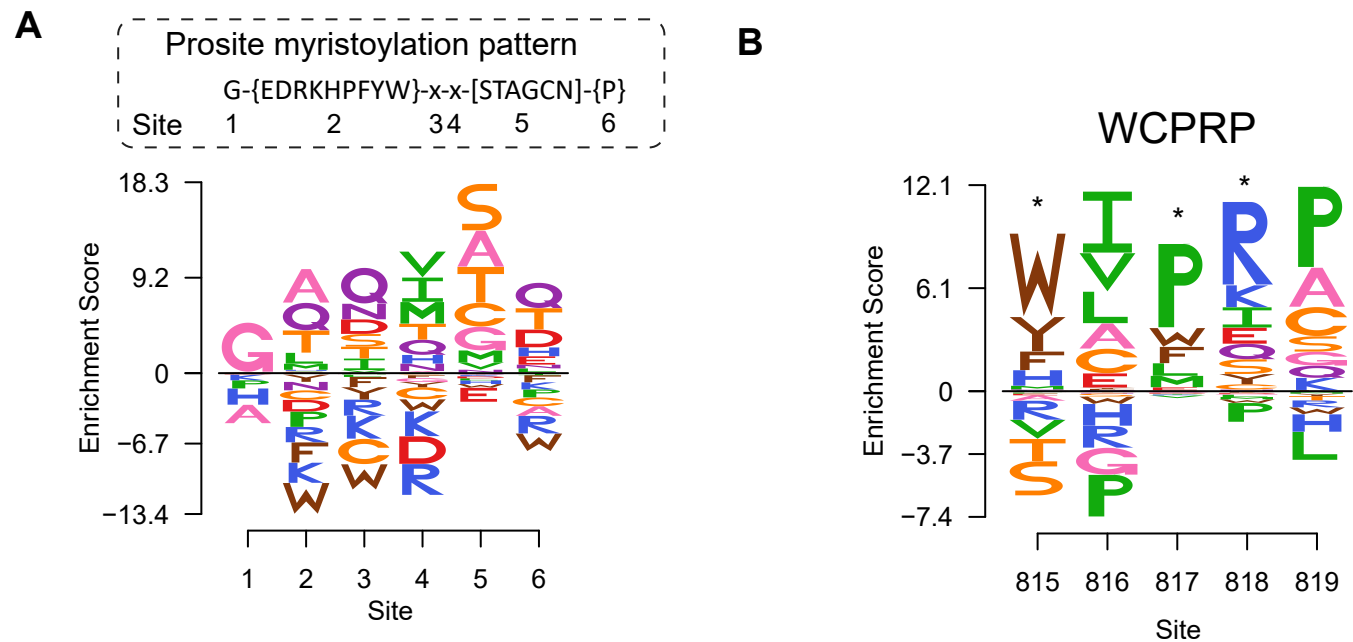

Supplement: supp [file elife-64256-supp-v1.zip]

Figure 2-figure supplement 1

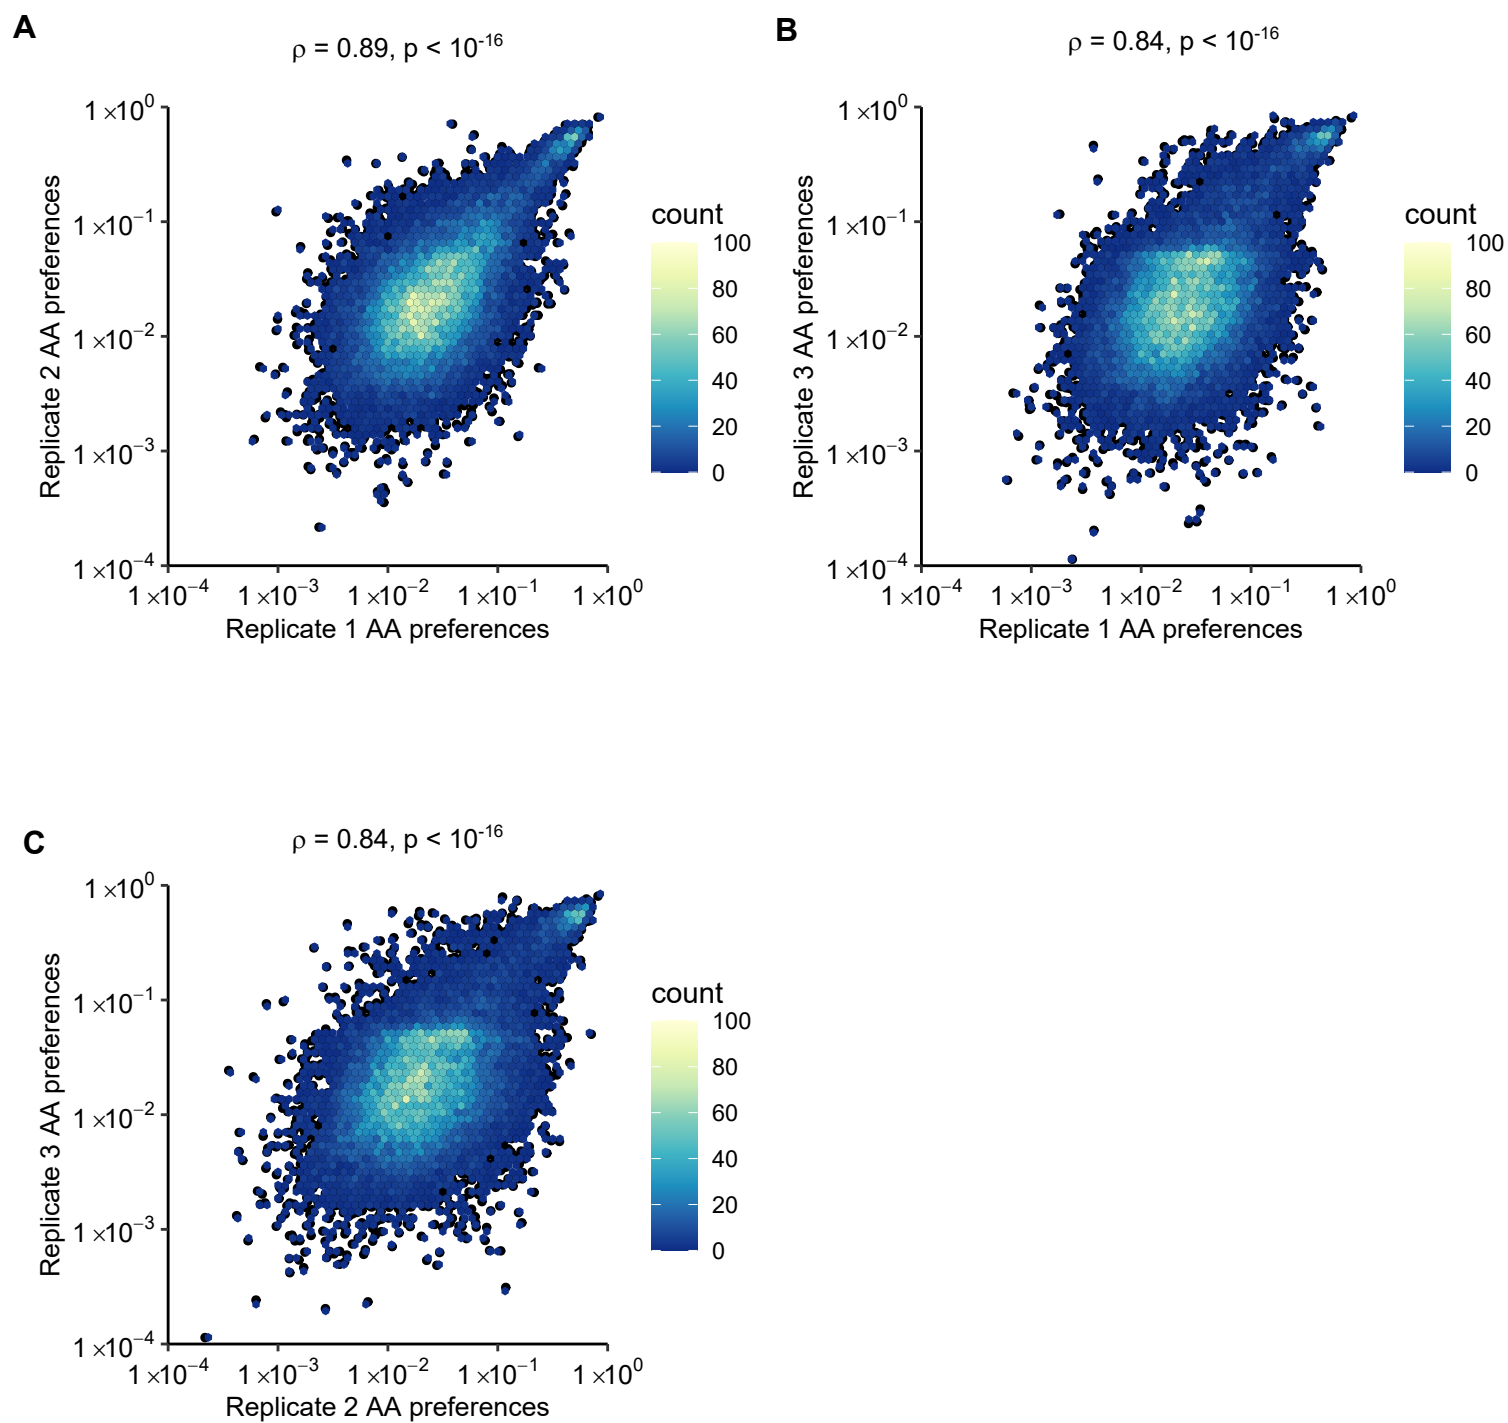

Supplement: supp [file elife-64256-supp-v1.zip]

Figure 1-figure supplement 1

**A**

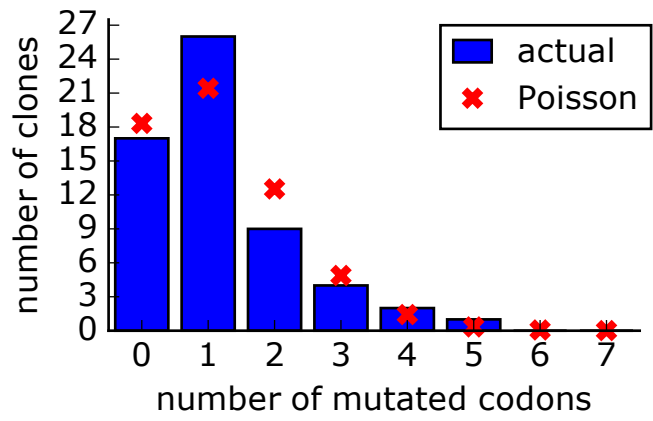

**B**

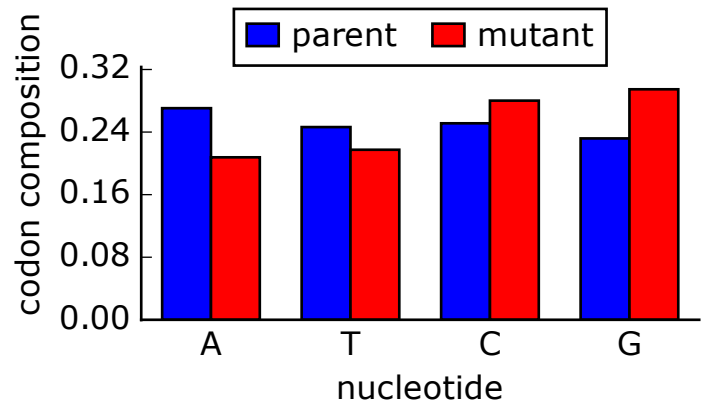

**C**

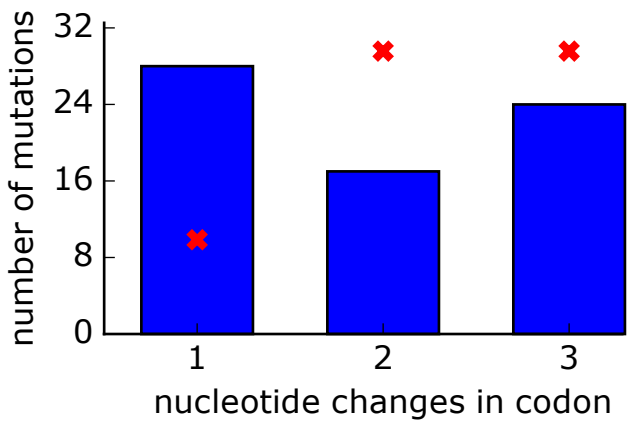

**D**

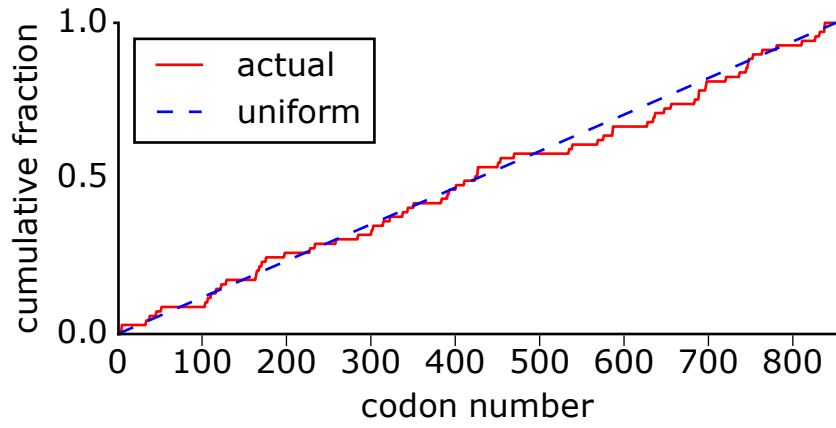

**E**

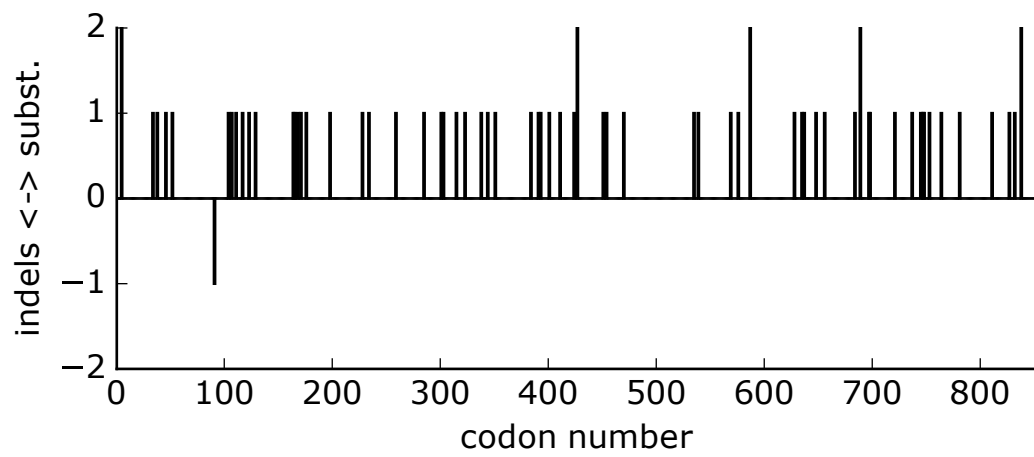

Supplement: supp [file elife-64256-supp-v1.zip]
